# Supplementary material for: Potential of Near-Infrared Spectroscopy (NIRS) for Efficient Classification Based on Postharvest Storage Time, Cultivar and Maturity in Coconut Water
Source: MDPI journal article supplement (doi:10.3390/foods12122415), 2023-06-20
Supplement: s1 [file s1]

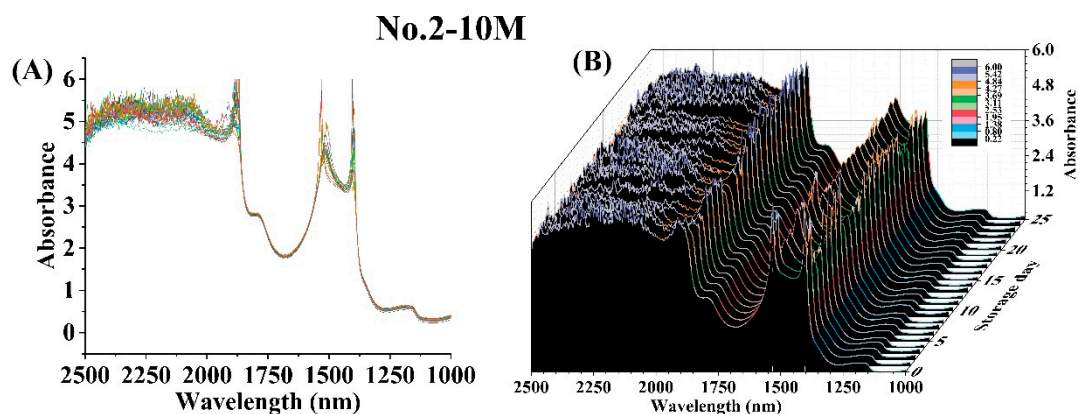

Figure S1. The two-dimensional (A) and three-dimensional (B) plots of average raw spectra at each postharvest storage time for No.2-10M.

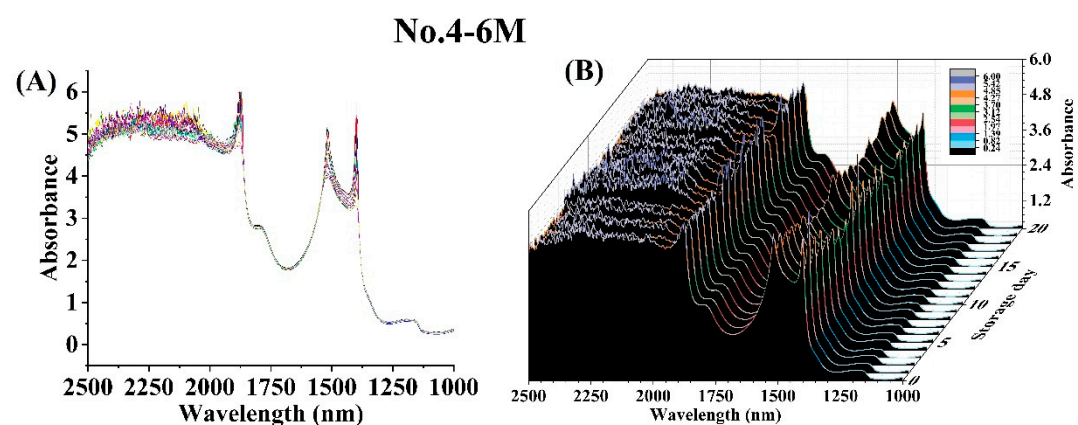

Figure S2. The two-dimensional (A) and three-dimensional (B) plots of average raw spectra at each postharvest storage time for No.4-6M.

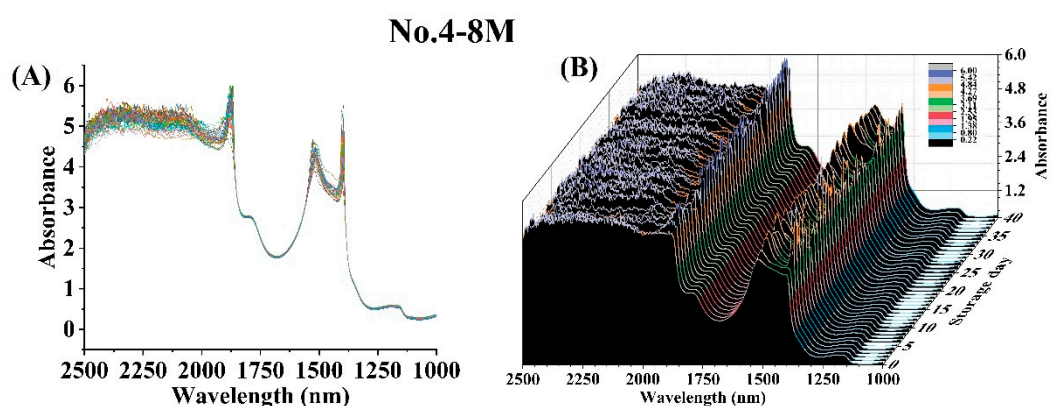

Figure S3. The two-dimensional (A) and three-dimensional (B) plots of average raw spectra at each postharvest storage time for No.4-8M.

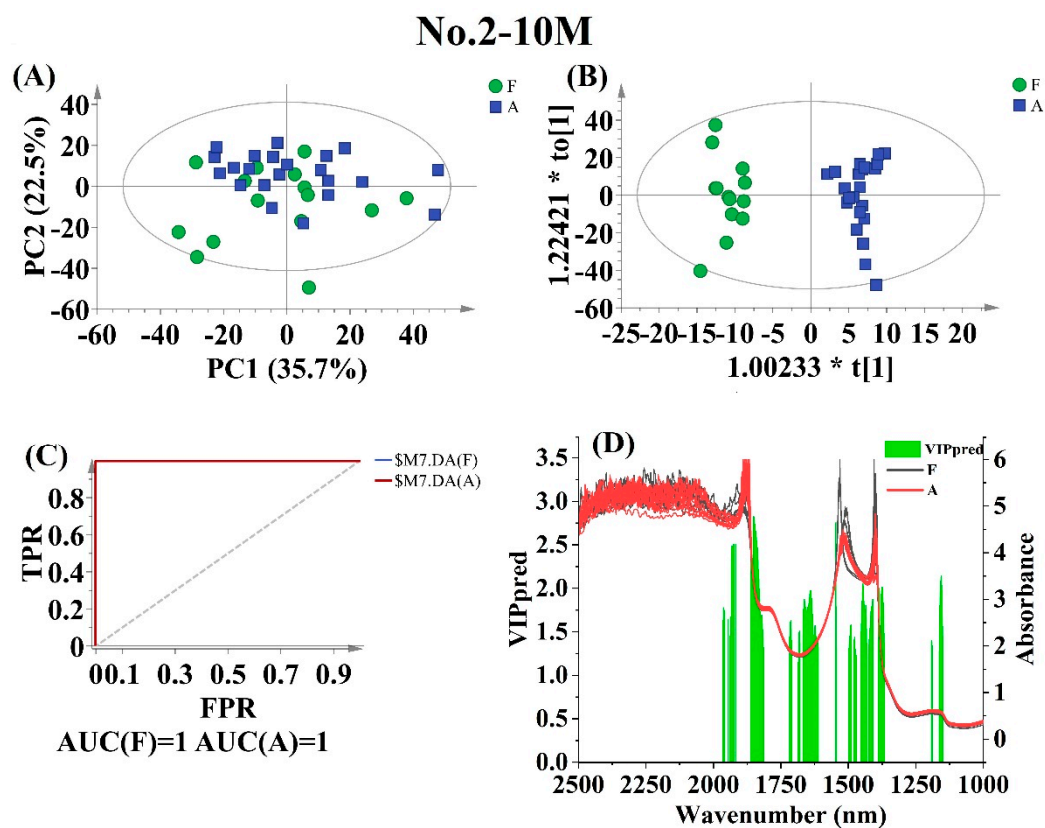

Figure S4. Discrimination results for No.2-10M according to postharvest storage time. Score scatter plot based on PCA analysis (A), Score scatter plot based on OPLS-DA analysis (B), AUC prediction value (C), and characteristic wavelengths (VIP > 1 and  $p < 0.05$ ) (D). The ellipse represents the Hotelling  $T^2$  with 95% confidence interval.

## No.4-6M

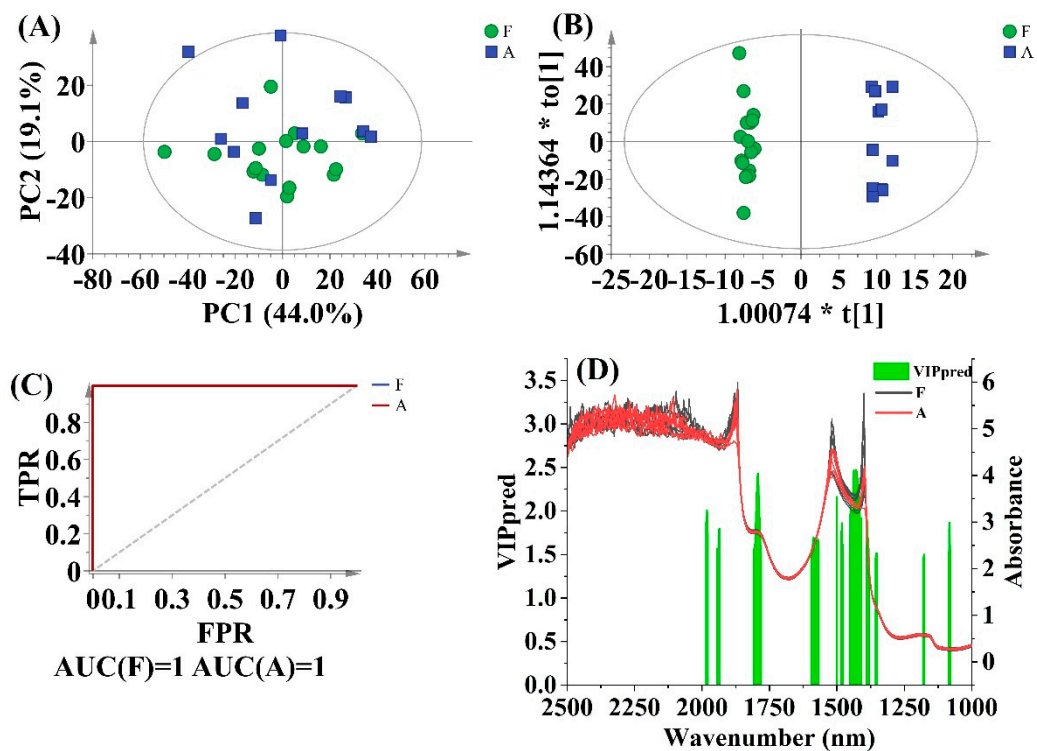

Figure S5. Discrimination results for No.4-6M according to postharvest storage time. Score scatter plot based on PCA analysis (A), Score scatter plot based on OPLS-DA analysis (B), AUC prediction value (C), and characteristic wavelengths (VIP > 1 and  $p < 0.05$ ) (D). The ellipse represents the Hotelling  $T^2$  with 95% confidence interval.

# No.4-8M

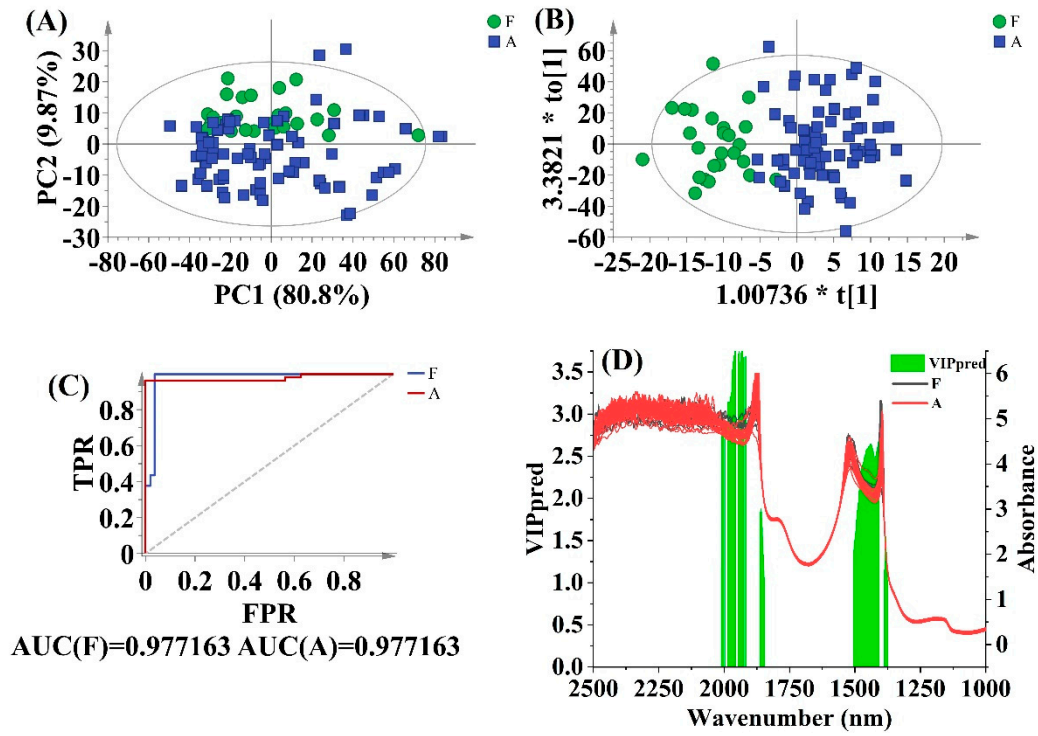

Figure S6. Discrimination results for No.4-8M according to postharvest storage time. Score scatter plot based on PCA analysis (A), Score scatter plot based on OPLS-DA analysis (B), AUC prediction value (C), and characteristic wavelengths (VIP > 1 and  $p < 0.05$ ) (D). The ellipse represents the Hotelling  $T^2$  with 95% confidence interval.
