# Supplementary material for: Potential of Near-Infrared Spectroscopy (NIRS) for Efficient Classification Based on Postharvest Storage Time, Cultivar and Maturity in Coconut Water
Source: Foods. 2023 Jun 20;12(12):2415. doi: 10.3390/foods12122415 (PMC10297207; doi:10.3390/foods12122415)
Supplement: Supplementary file 1 [file foods-12-02415-s001.zip › Supplementary Table.xlsx]

## Sheet: Table S1
Table S1 The mean, standard deviation, range, and coefficient of variation for biochemical traits in the coconut water samples from postharvest nuts for Wenye No.2 at developmental stage of 8 months.
	TSS							pH							TSS:pH							Reducing sugar content (%)							Soluble sugar content (%)
Storage day	Mean	N	SD	Min	Max	CV (%)		Mean	N	SD	Min	Max	CV (%)		Mean	N	SD	Min	Max	CV (%)		Mean	N	SD	Min	Max	CV (%)		Mean	N	SD	Min	Max	CV (%)
0	6.7333	6	0.44572	6.1	7.3	6.61964		5.0722	6	0.13205	4.94	5.29	2.60341		1.328	6	0.08888	1.18	1.41	6.69277		4.1688	6	0.26803	3.84	4.5	6.42943		4.7392	6	0.55896	4.18	5.52	11.7944
1	5.04	5	0.23022	4.8	5.4	4.56786		5.008	5	0.06585	4.93	5.1	1.3149		1.0066	5	0.05043	0.94	1.07	5.00993		4.377	5	0.273	4.09	4.77	6.23715		4.2111	5	0.26322	3.87	4.47	6.25062
2	5.56	5	0.31305	5.1	5.9	5.6304		5.3327	5	0.13877	5.15	5.47	2.60225		1.0429	5	0.05942	0.97	1.11	5.69757		4.2015	5	0.19603	3.94	4.44	4.66571		5.755	5	0.1335	5.53	5.88	2.31972
3	5.1867	5	0.40729	4.5	5.5	7.85258		5.1593	5	0.21573	4.99	5.53	4.18138		1.0058	5	0.07704	0.89	1.08	7.65957		4.1427	5	0.18169	3.83	4.26	4.38579		5.4476	5	0.40876	4.76	5.81	7.50349
4	5.4	5	0.45154	4.97	6.13	8.36185		5.396	5	0.21178	5.08	5.6	3.92476		1.0011	5	0.08096	0.95	1.14	8.0871		4.0607	5	0.28511	3.81	4.53	7.0212		5.5105	5	0.3392	5.18	5.91	6.15552
5	5.3733	5	0.36998	5.1	5.97	6.88553		5.2387	5	0.26447	5.03	5.62	5.04839		1.0281	5	0.09415	0.94	1.19	9.15767		4.1865	5	0.29802	3.8	4.59	7.1186		5.47	5	0.34177	5.15	6.02	6.24808
6	5.2	5	0.07071	5.1	5.3	1.35981		5.434	5	0.10644	5.34	5.61	1.95878		0.9571	5	0.01348	0.94	0.97	1.40842		3.3482	5	0.19464	3.11	3.61	5.81327		4.2181	5	0.10848	4.1	4.37	2.57177
7	5.192	5	0.33597	4.8	5.73	6.47092		5.0947	5	0.13031	4.94	5.24	2.55776		1.0189	5	0.0551	0.97	1.1	5.40779		3.7181	5	0.13846	3.54	3.88	3.72395		4.1932	5	0.30894	3.74	4.55	7.36764
8	5.3	5	0.23214	5.03	5.67	4.38		5.242	5	0.08815	5.12	5.35	1.68161		1.011	5	0.03937	0.96	1.06	3.89416		3.874	5	0.13938	3.64	3.98	3.59783		4.5391	5	0.15568	4.33	4.73	3.42975
9	4.98	5	0.37014	4.5	5.5	7.43253		5.404	5	0.26442	5.16	5.73	4.89304		0.9217	5	0.05545	0.85	0.96	6.01606		3.5276	5	0.20065	3.31	3.82	5.688		4.3131	5	0.20202	4.11	4.6	4.68387
10	5	5	0.18708	4.8	5.2	3.7416		5.21	5	0.15494	4.99	5.39	2.9739		0.9598	5	0.02704	0.92	0.99	2.81725		3.8081	5	0.10415	3.71	3.93	2.73496		4.096	5	0.23417	3.69	4.29	5.71704
11	5.9433	5	0.47193	5.3	6.6	7.94054		5.1673	5	0.08626	5.06	5.27	1.66934		1.1503	5	0.08984	1.01	1.25	7.81014		3.8166	5	0.23841	3.42	4.02	6.24666		4.3118	5	0.31356	3.95	4.68	7.27214
12	5.16	5	0.35071	4.7	5.6	6.79671		5.4027	5	0.31101	5.05	5.72	5.75657		0.9561	5	0.0593	0.87	1.03	6.20228		3.4887	5	0.32535	2.95	3.73	9.32582		4.046	5	0.32697	3.57	4.4	8.08131
13	5.2	5	0.18708	5	5.5	3.59769		5.306	5	0.25701	5.1	5.59	4.84376		0.9825	5	0.0712	0.89	1.08	7.24682		3.4691	5	0.36296	3.04	3.89	10.4627		4.1362	5	0.22056	3.77	4.36	5.33243
14	5.92	5	0.08367	5.8	6	1.41334		5.3667	5	0.27492	5.08	5.79	5.1227		1.1058	5	0.06624	1	1.16	5.99023		3.8081	5	0.45759	3	4.13	12.0162		4.3311	5	0.20755	4.08	4.55	4.79209
15	4.74	5	0.26077	4.4	5.1	5.50148		5.436	5	0.1639	5.24	5.69	3.01508		0.8719	5	0.03947	0.81	0.92	4.5269		3.7969	5	0.2016	3.55	4.04	5.30959		4.3968	5	0.16446	4.21	4.59	3.74045
16	5.52	5	0.29496	5.2	5.8	5.34348		5.3193	5	0.12282	5.18	5.45	2.30895		1.0373	5	0.03637	0.99	1.08	3.50622		3.847	5	0.19122	3.62	4.09	4.97063		4.4756	5	0.36357	4.01	4.96	8.12338
17	4.88	5	0.57184	4.3	5.8	11.718		5.4293	5	0.06635	5.36	5.52	1.22207		0.8984	5	0.09946	0.79	1.05	11.0708		3.6064	5	0.21223	3.29	3.78	5.88482		4.4086	5	0.15901	4.15	4.58	3.60681
18	4.98	5	0.87006	3.6	5.9	17.4711		5.2633	5	0.18032	5.02	5.46	3.42599		0.9491	5	0.18401	0.68	1.15	19.3878		3.8519	5	0.45941	3.26	4.42	11.9268		4.6849	5	0.53493	3.84	5.28	11.4182
19	5.3067	5	1.26038	3.73	6.9	23.7507		5.2567	5	0.08466	5.15	5.35	1.61052		1.0072	5	0.22564	0.71	1.29	22.4027		3.6806	5	0.29759	3.36	4	8.08537		4.4891	5	0.53279	3.86	5.04	11.8685
20	5.36	5	0.76681	4.7	6.5	14.3062		5.244	5	0.17188	5.09	5.52	3.27765		1.0255	5	0.17134	0.89	1.28	16.7079		3.8684	5	0.31861	3.63	4.4	8.23622		4.6525	5	0.54023	4.08	5.43	11.6116
21	4.9	5	0.29155	4.6	5.3	5.95		5.2853	5	0.26951	5.08	5.75	5.09924		0.927	5	0.02619	0.91	0.97	2.82524		4.143	5	0.55094	3.3	4.74	13.2981		4.5999	5	0.65141	3.57	5.18	14.1614
22	5.64	5	0.86487	4.7	6.7	15.3346		5.3113	5	0.09538	5.16	5.41	1.79579		1.0622	5	0.16372	0.89	1.24	15.4133		4.0716	5	0.4499	3.43	4.46	11.0497		4.4598	5	0.57806	3.54	5.03	12.9616
23	5.06	5	0.55045	4.6	5.8	10.8785		5.322	5	0.26214	5.18	5.79	4.92559		0.951	5	0.09761	0.88	1.12	10.2639		3.6659	5	0.42074	3.31	4.27	11.4771		3.9072	5	0.47007	3.55	4.59	12.0309
24	5.26	5	0.93167	4.7	6.9	17.7124		5.4393	5	0.12091	5.31	5.55	2.2229		0.969	5	0.18673	0.85	1.3	19.2704		4.2019	5	0.63103	3.24	4.77	15.0177		4.8438	5	0.25006	4.46	5.1	5.16248
25	4.48	5	0.46583	3.7	4.8	10.398		5.3027	5	0.10417	5.23	5.46	1.96447		0.8443	5	0.07989	0.71	0.9	9.46228		3.3783	5	0.35834	3.02	3.96	10.6071		3.9655	5	0.44597	3.48	4.59	11.2462
26	5.38	5	0.23875	5.1	5.7	4.43773		5.5473	5	0.15188	5.4	5.75	2.73791		0.9713	5	0.06784	0.9	1.06	6.98445		3.2477	5	0.6999	2.65	4.36	21.5506		3.8775	5	0.38983	3.35	4.4	10.0536
27	5.84	5	0.34351	5.5	6.3	5.88202		5.4833	5	0.06005	5.4	5.56	1.09514		1.0648	5	0.05664	1	1.13	5.31931		3.6302	5	0.64266	2.91	4.33	17.7032		4.2015	5	0.62409	3.58	5.03	14.854
28	5.4	5	0.57009	4.4	5.8	10.5572		5.5553	5	0.15604	5.39	5.73	2.80885		0.9736	5	0.11557	0.77	1.07	11.8704		3.5381	5	0.23337	3.3	3.86	6.59591		3.7636	5	0.70205	2.52	4.24	18.6537
29	5.26	5	0.39115	4.8	5.7	7.43631		5.514	5	0.23073	5.21	5.74	4.18444		0.953	5	0.03581	0.92	1.01	3.75761		3.1387	5	0.34572	2.67	3.49	11.0148		3.6493	5	0.23084	3.27	3.85	6.3256
30	5.78	5	0.29496	5.4	6.2	5.10311		5.5567	5	0.06115	5.47	5.63	1.10047		1.0408	5	0.06452	0.96	1.13	6.19908		3.6992	5	0.51293	3.21	4.55	13.866		4.1244	5	0.41071	3.77	4.81	9.95805
31	5.62	5	0.49699	5.2	6.3	8.84324		5.4869	5	0.13531	5.3	5.67	2.46606		1.0263	5	0.11444	0.94	1.19	11.1507		3.3451	5	0.93046	2.44	4.67	27.8156		3.8902	5	0.60823	3.43	4.9	15.6349
32	5.32	5	0.46583	4.7	5.8	8.7562		5.5107	5	0.16192	5.37	5.77	2.93828		0.9674	5	0.10411	0.82	1.06	10.7618		3.3044	5	0.78246	2.5	4.15	23.6793		3.8083	5	0.49832	3.31	4.55	13.0851
33	5.26	5	0.37148	4.8	5.8	7.06236		5.4027	5	0.24577	4.97	5.57	4.54902		0.9777	5	0.11558	0.86	1.17	11.8216		3.0753	5	0.40291	2.41	3.46	13.1015		3.6524	5	0.32394	3.32	4.19	8.86924
34	5.2267	5	0.76063	4	6.1	14.5528		5.508	5	0.17313	5.37	5.81	3.14325		0.9486	5	0.13491	0.75	1.12	14.222		2.8256	5	0.59142	2.3	3.84	20.9308		3.4033	5	0.679	2.45	4.36	19.9512
35	5.24	5	0.48785	4.5	5.8	9.31011		5.418	5	0.22973	5.17	5.62	4.24013		0.9687	5	0.09828	0.8	1.05	10.1456		2.4389	5	0.54217	1.75	3.24	22.2301		3.1292	5	0.66448	2.26	3.92	21.2348
36	5.32	5	0.32711	4.8	5.6	6.14868		5.5447	5	0.19409	5.33	5.79	3.50046		0.9618	5	0.08719	0.83	1.03	9.06529		2.4007	5	0.64823	1.57	3.3	27.0017		3.0968	5	0.43149	2.49	3.54	13.9334
37	5.04	5	0.38471	4.6	5.5	7.63313		5.4993	5	0.3027	5.11	5.92	5.50434		0.9185	5	0.08496	0.83	1.04	9.24986		2.4427	5	0.35431	2.04	2.84	14.5049		3.1243	5	0.24521	2.88	3.41	7.84848
38	5.38	5	0.33466	4.9	5.7	6.22045		5.546	5	0.24837	5.26	5.95	4.47836		0.9713	5	0.07012	0.89	1.08	7.21919		2.8596	5	0.57466	2.11	3.63	20.0958		3.7124	5	0.31455	3.26	4.05	8.47296
39	5.1	5	0.47958	4.6	5.6	9.40353		5.7187	5	0.25012	5.29	5.91	4.37372		0.8922	5	0.07824	0.81	0.96	8.76933		2.8596	5	0.35215	2.26	3.19	12.3147		3.528	5	0.50463	2.82	4.02	14.3036
N: number of samples; SD: Standard deviation; Min: minimum value; Max: maximum value; CV: coefficient of variance.

## Sheet: Table S2
Table S2 The mean, standard deviation, range, and coefficient of variation for biochemical traits in the coconut water samples from postharvest nuts for Wenye No.2 at developmental stage of 10 months.
	TSS							pH							TSS:pH							Reducing sugar content (%)							Soluble sugar content (%)
Storage day	Mean	N	SD	Min	Max	CV (%)		Mean	N	SD	Min	Max	CV (%)		Mean	N	SD	Min	Max	CV (%)		Mean	N	SD	Min	Max	CV (%)		Mean	N	SD	Min	Max	CV (%)
0	7.1556	3	0.05092	7.1	7.2	0.71161		5.2933	3	0.15191	5.15	5.45	2.86985		1.3527	3	0.04821	1.3	1.4	3.56398		4.576	3	0.44368	4.06	4.86	9.6958		5.4222	3	0.19816	5.19	5.56	3.65461
1	5.2333	3	0.30551	4.9	5.5	5.83781		5.1644	3	0.12659	5.08	5.31	2.4512		1.0131	3	0.04599	0.96	1.04	4.53953		4.2473	3	0.3356	3.91	4.58	7.90149		5.4113	3	0.48	5.09	5.96	8.87033
2	5.4667	3	0.20817	5.3	5.7	3.80796		5.22	3	0.23333	4.99	5.45	4.46992		1.0475	3	0.01431	1.03	1.06	1.36611		4.1696	3	0.50261	3.59	4.48	12.0542		5.4091	3	0.27845	5.2	5.72	5.14781
3	4.7	3	0.6	4.1	5.3	12.766		5.2444	3	0.23191	4.98	5.38	4.42205		0.8974	3	0.11901	0.76	0.99	13.2616		3.4066	3	0.73596	2.64	4.11	21.6039		4.2232	3	0.78615	3.69	5.13	18.615
4	5.8333	3	0.45092	5.4	6.3	7.7301		5.5956	3	0.135	5.45	5.72	2.41261		1.0438	3	0.10078	0.96	1.16	9.65511		4.1568	3	0.31092	3.88	4.5	7.47979		5.5908	3	0.39265	5.29	6.04	7.02315
5	5.2333	3	0.23094	5.1	5.5	4.41289		5.3267	3	0.20984	5.09	5.49	3.9394		0.9827	3	0.03317	0.94	1	3.37539		3.8538	3	0.34821	3.64	4.26	9.0355		5.0055	3	0.21753	4.83	5.25	4.34582
6	5.2444	3	0.17105	5.1	5.43	3.26157		5.3044	3	0.41299	4.83	5.58	7.7858		0.9945	3	0.11295	0.93	1.12	11.3575		3.6582	3	0.26968	3.37	3.91	7.37193		5.0041	3	0.0967	4.89	5.06	1.93242
7	5.0889	3	0.10184	5	5.2	2.00122		5.44	3	0.22835	5.18	5.58	4.19761		0.9362	3	0.02762	0.91	0.97	2.95022		3.4019	3	0.79127	2.49	3.86	23.2596		4.8545	3	0.27611	4.56	5.11	5.68771
8	6.6444	3	0.13878	6.53	6.8	2.08868		5.5	3	0.13748	5.35	5.62	2.49964		1.2082	3	0.01393	1.19	1.22	1.15295		3.5222	3	0.45155	3.01	3.86	12.8201		4.6465	3	0.06455	4.6	4.72	1.38922
9	4.8333	3	0.40415	4.4	5.2	8.36178		5.6344	3	0.19277	5.42	5.79	3.4213		0.86	3	0.09996	0.76	0.96	11.6233		3.2782	3	0.29425	3	3.58	8.97596		4.5567	3	0.36002	4.25	4.95	7.90089
10	5.2778	3	0.06939	5.2	5.33	1.31475		5.6911	3	0.25678	5.41	5.91	4.51196		0.9283	3	0.03246	0.9	0.96	3.49671		3.5019	3	0.82763	2.78	4.41	23.6337		4.6552	3	0.37784	4.26	5.01	8.11651
11	5.7	3	0.2	5.5	5.9	3.50877		5.5333	3	0.20984	5.37	5.77	3.79231		1.0302	3	0.01192	1.02	1.04	1.15706		3.1141	3	0.07942	3.02	3.16	2.55034		4.5494	3	0.19003	4.37	4.75	4.17703
12	5.4667	3	0.35119	5.1	5.8	6.42417		5.5022	3	0.22623	5.34	5.76	4.11163		0.996	3	0.09802	0.89	1.07	9.84137		3.959	3	0.98062	3.26	5.08	24.7694		4.7457	3	0.1853	4.55	4.92	3.90459
13	4.9667	3	0.15275	4.8	5.1	3.07548		5.6311	3	0.05004	5.58	5.68	0.888636		0.882	3	0.02594	0.85	0.9	2.94104		2.9565	3	0.21481	2.71	3.11	7.26569		4.2458	3	0.10448	4.13	4.32	2.46078
14	5.7667	3	0.25166	5.5	6	4.36402		5.4278	3	0.07275	5.36	5.51	1.34032		1.0624	3	0.04219	1.03	1.11	3.9712		3.5076	3	0.623	2.79	3.94	17.7614		4.4947	3	0.12084	4.36	4.59	2.6885
15	4.9	3	0.45826	4.5	5.4	9.35224		5.4356	3	0.40383	4.97	5.72	7.42935		0.9013	3	0.04458	0.86	0.94	4.94619		3.7294	3	0.60521	3.07	4.26	16.2281		4.467	3	0.41513	4.18	4.94	9.29326
16	6.0111	3	0.38345	5.63	6.4	6.37903		5.5633	3	0.17521	5.38	5.73	3.14939		1.0804	3	0.0588	1.05	1.15	5.44243		3.1731	3	0.84542	2.36	4.04	26.6433		4.1882	3	0.57547	3.67	4.81	13.7403
17	4.5	3	0.2	4.3	4.7	4.44444		5.2622	3	0.24065	5.12	5.54	4.57318		0.8553	3	0.01936	0.84	0.88	2.26353		2.2273	3	0.52986	1.7	2.76	23.7893		3.6321	3	0.41576	3.23	4.06	11.4468
18	4.8	3	0.1	4.7	4.9	2.08333		5.3878	3	0.269	5.08	5.59	4.99276		0.8929	3	0.06152	0.86	0.96	6.88991		2.4731	3	0.42481	1.99	2.78	17.1772		4.0554	3	0.21881	3.87	4.29	5.39552
19	5	3	0.2	4.8	5.2	4		5.4478	3	0.25565	5.15	5.61	4.69272		0.9182	3	0.0238	0.89	0.93	2.59203		2.8053	3	0.92563	2.04	3.83	32.9958		4.2305	3	0.48095	3.74	4.7	11.3686
20	4.8333	3	0.05774	4.8	4.9	1.19463		5.4856	3	0.35719	5.07	5.7	6.51141		0.8834	3	0.05473	0.85	0.95	6.19538		2.8934	3	0.36213	2.56	3.28	12.5157		4.2969	3	0.32731	3.97	4.62	7.61735
21	4.3667	3	0.41633	3.9	4.7	9.5342		5.22	3	0.25239	5.05	5.51	4.83506		0.8359	3	0.057	0.77	0.88	6.819		2.2699	3	0.43921	1.76	2.54	19.3493		3.5387	3	0.40912	3.07	3.82	11.5613
22	4.9	3	0.17321	4.8	5.1	3.5349		5.5033	3	0.12342	5.4	5.64	2.24265		0.891	3	0.04813	0.85	0.94	5.4018		2.4071	3	0.33533	2.05	2.71	13.9309		4.0065	3	0.26688	3.79	4.3	6.66118
23	5.0333	3	1.00664	4.1	6.1	19.9996		5.7022	3	0.2495	5.44	5.94	4.3755		0.8874	3	0.20989	0.72	1.12	23.6522		2.9296	3	0.88003	2.4	3.95	30.0393		4.2575	3	0.49109	3.74	4.72	11.5347
24	4.7	3	0.2	4.5	4.9	4.25532		5.5056	3	0.18201	5.31	5.67	3.30591		0.8538	3	0.02857	0.83	0.89	3.34622		3.1427	3	0.55251	2.54	3.62	17.5807		3.8992	3	0.27632	3.58	4.1	7.08658
25	4.9	3	0.34641	4.7	5.3	7.06959		5.55	3	0.25392	5.26	5.75	4.57514		0.8861	3	0.105	0.82	1.01	11.8497		2.5963	3	0.31855	2.23	2.8	12.2694		3.9313	3	0.2931	3.61	4.19	7.45555
N: number of samples; SD: Standard deviation; Min: minimum value; Max: maximum value; CV: coefficient of variance.

## Sheet: Table S3
Table S3 The mean, standard deviation, range, and coefficient of variation for biochemical traits in the coconut water samples from postharvest nuts for Wenye No.4 at developmental stage of 6 months.
	TSS							pH							TSS:pH							Reducing sugar content (%)							Soluble sugar content (%)
Storage day	Mean	N	SD	Min	Max	CV (%)		Mean	N	SD	Min	Max	CV (%)		Mean	N	SD	Min	Max	CV (%)		Mean	N	SD	Min	Max	CV (%)		Mean	N	SD	Min	Max	CV (%)
0	7.2889	3	1.39297	5.77	8.5	19.1108		4.7578	3	0.08113	4.67	4.83	1.7052		1.5318	3	0.28803	1.21	1.76	18.8034		4.367	3	0.39038	3.95	4.72	8.93932		4.2123	3	0.31159	3.85	4.4	7.39715
1	5.4333	3	0.60645	5.07	6.13	11.1617		4.8744	3	0.14804	4.71	4.99	3.03709		1.1179	3	0.16068	1.02	1.3	14.3734		5.1394	3	0.05371	5.09	5.2	1.04506		5.331	3	0.44553	4.88	5.77	8.35734
2	6.3889	3	1.10017	5.17	7.3	17.22		4.7033	3	0.04163	4.67	4.75	0.885123		1.3577	3	0.22758	1.1	1.54	16.7622		5.0921	3	0.12765	4.95	5.2	2.50682		4.9639	3	0.34046	4.75	5.36	6.85872
3	6.9333	3	0.25166	6.7	7.2	3.62973		4.8978	3	0.10668	4.82	5.02	2.17812		1.4167	3	0.07921	1.33	1.49	5.59116		4.4353	3	0.24883	4.17	4.66	5.61022		4.8048	3	0.30421	4.47	5.06	6.33138
4	6.4	3	0.26458	6.2	6.7	4.13406		4.6178	3	0.24077	4.35	4.81	5.21395		1.3875	3	0.06536	1.32	1.45	4.71063		3.5502	3	0.95426	2.96	4.65	26.879		3.7445	3	0.89431	3.03	4.75	23.8833
5	5.1667	3	0.45092	4.7	5.6	8.72743		4.7856	3	0.08579	4.69	4.84	1.79267		1.0789	3	0.07838	1	1.16	7.26481		4.2636	3	0.33423	3.9	4.56	7.83915		4.5341	3	0.57013	3.89	4.96	12.5743
6	5.0444	3	0.36868	4.7	5.43	7.3087		4.7433	3	0.08505	4.66	4.83	1.79306		1.0631	3	0.06722	0.99	1.12	6.32302		4.0109	3	0.27534	3.83	4.33	6.86479		4.2042	3	0.45683	3.87	4.72	10.866
7	4.8667	3	0.15275	4.7	5	3.13868		4.8533	3	0.03055	4.82	4.88	0.629469		1.0028	3	0.03515	0.97	1.04	3.50519		4.6122	3	0.14083	4.46	4.74	3.05342		5.342	3	0.23223	5.1	5.57	4.34725
8	5.0778	3	0.2269	4.9	5.33	4.46847		4.8022	3	0.06336	4.74	4.87	1.3194		1.0574	3	0.04661	1.03	1.11	4.40798		4.3839	3	0.06568	4.32	4.45	1.49821		5.2967	3	0.19291	5.07	5.42	3.64208
9	4.7	3	0.43589	4.4	5.2	9.27426		4.8478	3	0.08336	4.76	4.93	1.71954		0.9698	3	0.09242	0.89	1.07	9.5298		4.2952	3	0.25751	4.03	4.55	5.9953		5.0012	3	0.38627	4.72	5.44	7.72355
10	4.9222	3	0.30246	4.6	5.2	6.14481		4.8067	3	0.00882	4.8	4.82	0.183494		1.024	3	0.06313	0.96	1.08	6.16504		4.634	3	0.43682	4.23	5.1	9.42641		5.0143	3	0.46836	4.56	5.5	9.34049
11	5.0333	3	0.11547	4.9	5.1	2.29412		4.9289	3	0.04501	4.88	4.97	0.913185		1.0213	3	0.02549	0.99	1.04	2.49584		3.9431	3	1.27302	2.47	4.73	32.2848		4.3159	3	1.37992	2.72	5.14	31.9729
12	5.9333	3	0.25166	5.7	6.2	4.24148		4.8611	3	0.05004	4.81	4.91	1.0294		1.2205	3	0.04779	1.19	1.27	3.91561		4.8705	3	0.35066	4.6	5.27	7.19967		5.2602	3	0.30667	5.01	5.6	5.83001
13	4.9333	3	0.75719	4.4	5.8	15.3485		4.8867	3	0.1701	4.76	5.08	3.48088		1.007	3	0.11972	0.91	1.14	11.8888		4.7348	3	0.18605	4.52	4.86	3.92942		5.007	3	0.53585	4.53	5.59	10.702
14	5.1	3	0.1	5	5.2	1.96078		4.91	3	0.05239	4.85	4.95	1.06701		1.0386	3	0.01098	1.03	1.05	1.05719		4.4977	3	0.13396	4.38	4.64	2.97841		4.6815	3	0.23985	4.48	4.95	5.12336
15	4.7444	3	0.3203	4.4	5.03	6.75112		4.9722	3	0.0631	4.9	5.02	1.26906		0.9547	3	0.07363	0.88	1.03	7.71237		4.4586	3	0.2644	4.17	4.7	5.93011		4.5983	3	0.30092	4.26	4.82	6.54416
16	5.4667	3	0.03333	5.43	5.5	0.609691		4.96	3	0.12288	4.87	5.1	2.47742		1.1025	3	0.02232	1.08	1.12	2.02449		4.4376	3	0.11319	4.31	4.53	2.5507		4.7975	3	0.09961	4.7	4.9	2.07629
17	5.6333	3	0.65064	5	6.3	11.5499		4.9533	3	0.18586	4.74	5.1	3.75225		1.1389	3	0.14166	0.98	1.25	12.4383		4.461	3	0.28385	4.14	4.68	6.36292		4.7049	3	0.38553	4.3	5.06	8.19422
18	4.2	3	0.75498	3.5	5	17.9757		5.0456	3	0.03097	5.02	5.08	0.613802		0.833	3	0.1544	0.69	1	18.5354		3.9501	3	0.48644	3.44	4.41	12.3146		4.3882	3	0.45553	3.98	4.88	10.3808
19	5.0333	3	0.51316	4.6	5.6	10.1953		4.93	3	0.17088	4.75	5.09	3.46613		1.0204	3	0.086	0.93	1.1	8.42807		4.5462	3	0.22129	4.3	4.72	4.86758		4.945	3	0.41301	4.67	5.42	8.35207
20	5.8	3	0.2	5.6	6	3.44828		5.0144	3	0.07647	4.93	5.07	1.52501		1.1572	3	0.0568	1.11	1.22	4.9084		4.1977	3	0.07287	4.14	4.28	1.73595		4.6319	3	0.02581	4.6	4.65	0.557223
N: number of samples; SD: Standard deviation; Min: minimum value; Max: maximum value; CV: coefficient of variance.

## Sheet: Table S4
Table S4 The mean, standard deviation, range, and coefficient of variation for biochemical traits in the coconut water samples from postharvest nuts for Wenye No.4 at developmental stage of 8 months.
	TSS							pH							TSS:pH							Reducing sugar content (%)							Soluble sugar content (%)
Storage day	Mean	N	SD	Min	Max	CV (%)		Mean	N	SD	Min	Max	CV (%)		Mean	N	SD	Min	Max	CV (%)		Mean	N	SD	Min	Max	CV (%)		Mean	N	SD	Min	Max	CV (%)
0	9.6056	6	0.56467	8.9	10.2	5.87855		5.3	6	0.27236	4.95	5.54	5.13887		1.8123	6	0.04808	1.73	1.86	2.65298		4.7506	6	0.25558	4.32	5.02	5.37995		6.2829	6	0.34528	5.74	6.64	5.49555
1	5.9667	5	0.57591	5.37	6.8	9.65207		5.226	5	0.24013	5.02	5.62	4.59491		1.1402	5	0.07048	1.05	1.21	6.18137		4.4439	5	0.48751	3.62	4.85	10.9703		6.0552	5	0.38527	5.71	6.71	6.36263
2	5.9667	5	0.65362	5.3	6.83	10.9545		5.1273	5	0.28119	4.77	5.5	5.48417		1.1625	5	0.09176	1.06	1.24	7.89333		4.8471	5	0.60238	4.23	5.83	12.4276		6.2767	5	0.62798	5.62	7.01	10.0049
3	7.8067	5	0.59039	6.8	8.3	7.56261		5.4953	5	0.31285	4.95	5.7	5.69305		1.4197	5	0.04526	1.37	1.46	3.188		4.2036	5	1.29184	2.06	5.45	30.7318		6.2102	5	0.45019	5.6	6.85	7.2492
4	7.9933	5	0.48614	7.2	8.5	6.08184		5.272	5	0.33231	4.7	5.54	6.3033		1.5167	5	0.03586	1.48	1.56	2.36434		4.5225	5	0.24136	4.33	4.92	5.33687		6.1743	5	0.47787	5.43	6.75	7.73966
5	5.64	5	0.29665	5.3	6.1	5.25975		5.2633	5	0.26876	5.09	5.72	5.1063		1.0716	5	0.02097	1.04	1.1	1.95689		4.2733	5	0.22495	4.01	4.61	5.26408		5.3012	5	0.48548	4.57	5.93	9.15793
6	6.0933	5	0.62601	5.4	6.87	10.2737		5.4247	5	0.21988	5.07	5.66	4.05331		1.1229	5	0.10196	1	1.27	9.08006		4.2028	5	0.44801	3.53	4.59	10.6598		5.8117	5	0.65366	4.93	6.52	11.2473
7	6.2893	5	0.08889	6.2	6.4	1.41335		5.5793	5	0.09275	5.48	5.71	1.66239		1.1277	5	0.03254	1.09	1.16	2.88552		3.6612	5	0.50777	2.9	4.17	13.869		4.9436	5	0.07493	4.81	4.99	1.5157
8	5.7933	5	0.38759	5.3	6.2	6.69031		5.512	5	0.26627	5.23	5.8	4.83073		1.0504	5	0.02501	1.01	1.08	2.381		3.5955	5	0.24165	3.26	3.85	6.7209		5.0487	5	0.20134	4.79	5.29	3.98796
9	5.5467	5	0.392	5.2	6.07	7.06727		5.0893	5	0.25688	4.88	5.47	5.04745		1.0894	5	0.04039	1.05	1.16	3.70755		3.6901	5	0.73049	2.79	4.41	19.7959		4.5859	5	0.16434	4.43	4.86	3.58359
10	5.8333	5	0.26771	5.5	6.1	4.58934		5.424	5	0.30658	4.98	5.72	5.65229		1.0774	5	0.0606	0.98	1.12	5.62465		4.5982	5	0.75701	3.58	5.26	16.4632		5.5455	5	0.28577	5.17	5.78	5.15319
11	5.6933	5	0.49688	5.1	6.3	8.72745		5.24	5	0.24503	4.94	5.46	4.67615		1.0869	5	0.08366	0.95	1.17	7.69712		4.0145	5	0.3589	3.65	4.54	8.94009		5.4675	5	0.38621	5.06	5.95	7.06374
12	6.5333	5	0.63026	5.8	7.5	9.64689		5	5	0.04836	4.95	5.05	0.9672		1.3067	5	0.12445	1.15	1.49	9.52399		4.4265	5	0.20675	4.17	4.71	4.67073		5.1365	5	0.2904	4.68	5.46	5.65366
13	5.18	5	0.29496	4.9	5.6	5.69421		5.3693	5	0.34068	5.04	5.83	6.34496		0.9686	5	0.09421	0.87	1.11	9.72641		3.9523	5	0.4722	3.4	4.53	11.9475		5.1356	5	0.3431	4.58	5.5	6.68082
14	5.6067	5	0.36773	5	5.9	6.55876		5.2887	5	0.4053	4.93	5.85	7.66351		1.0651	5	0.1096	0.96	1.2	10.2901		3.9453	5	0.41926	3.39	4.39	10.6268		4.9544	5	0.36471	4.43	5.36	7.36134
15	5.52	5	0.57184	4.8	6.2	10.3594		5.2853	5	0.24473	5.01	5.61	4.63039		1.0434	5	0.08418	0.96	1.18	8.06786		3.8508	5	0.31597	3.46	4.19	8.20531		5.006	5	0.29167	4.66	5.37	5.82641
16	5.82	5	0.37014	5.5	6.4	6.35979		5.4593	5	0.36302	5.15	5.94	6.64957		1.0715	5	0.11906	0.93	1.24	11.1115		3.5578	5	0.42182	3.1	4.03	11.8562		5.0201	5	0.34898	4.75	5.59	6.95165
17	6.08	5	1.07098	4.6	7	17.6148		5.21	5	0.27988	4.99	5.56	5.37198		1.1649	5	0.18436	0.91	1.38	15.8263		3.5727	5	0.51873	2.87	4.2	14.5193		4.5702	5	0.96184	3.16	5.42	21.0459
18	6.1	5	0.8	4.8	6.8	13.1148		5.3167	5	0.29329	4.96	5.76	5.51639		1.1559	5	0.20251	0.83	1.33	17.5197		3.7584	5	0.61344	2.83	4.31	16.3218		4.7798	5	0.34333	4.37	5.16	7.18294
19	5.3	5	1.0583	4.1	6.3	19.9679		5.3533	5	0.35701	5.07	5.9	6.66897		0.9856	5	0.15548	0.8	1.14	15.7752		3.6191	5	0.3391	3.3	4.03	9.36973		4.8141	5	0.82648	3.84	5.68	17.1679
20	6.1733	5	0.765	5.2	6.8	12.3921		5.3527	5	0.3566	5.07	5.9	6.66206		1.1618	5	0.1942	0.88	1.34	16.7154		3.6187	5	0.29585	3.25	3.92	8.17559		4.4152	5	0.41488	4.04	5.09	9.39663
21	5.46	5	0.78294	4.6	6.5	14.3396		5.6433	5	0.37977	5.21	5.95	6.72957		0.9641	5	0.08289	0.88	1.09	8.59766		3.1602	5	0.43819	2.5	3.62	13.8659		4.7275	5	0.68777	3.67	5.55	14.5483
22	5.6333	5	0.29814	5.3	6.1	5.29246		5.5827	5	0.37454	5.02	6	6.70894		1.013	5	0.08913	0.91	1.11	8.79862		2.8557	5	0.54341	2.22	3.69	19.029		4.4874	5	0.28669	4.13	4.85	6.38878
23	6.24	5	1.63493	4.6	8.7	26.2008		5.58	5	0.44906	4.97	5.98	8.04767		1.1334	5	0.36896	0.82	1.75	32.5534		2.9647	5	0.2706	2.74	3.4	9.1274		4.5434	5	0.59781	3.54	5.1	13.1578
24	5.44	5	0.21909	5.2	5.6	4.02739		5.5987	5	0.19577	5.39	5.86	3.4967		0.9736	5	0.07128	0.89	1.04	7.32128		2.6827	5	0.41566	2.03	3.04	15.4941		4.6906	5	0.22841	4.29	4.85	4.86953
25	6.34	5	0.98387	4.8	7.2	15.5185		5.564	5	0.11908	5.39	5.7	2.14019		1.1416	5	0.19143	0.85	1.32	16.7686		2.4259	5	0.62832	1.94	3.18	25.9005		4.7865	5	0.54165	4.22	5.54	11.3162
26	6.04	5	0.31305	5.5	6.3	5.18295		5.778	5	0.15305	5.62	5.98	2.64884		1.0455	5	0.05289	0.98	1.12	5.05882		2.454	5	0.70547	1.84	3.63	28.7478		4.7028	5	0.32246	4.43	5.13	6.85677
27	5.1	5	0.57009	4.3	5.9	11.1782		5.7213	5	0.14852	5.54	5.94	2.59591		0.8923	5	0.10881	0.76	1.06	12.1943		2.6722	5	0.80513	2.15	4.1	30.1299		4.4335	5	0.50056	3.75	5.17	11.2904
28	5.64	5	0.43932	5.2	6.3	7.78936		5.5007	5	0.21399	5.26	5.71	3.89023		1.0288	5	0.11798	0.91	1.19	11.4677		3.3769	5	1.0108	2.3	4.4	29.9328		4.568	5	0.5336	4	5.13	11.6813
29	5.46	5	1.32778	4.5	7.4	24.3183		5.5327	5	0.2888	5.24	5.93	5.21987		0.9895	5	0.25121	0.78	1.38	25.3876		4.0327	5	0.70822	3.25	4.72	17.5619		5.1945	5	0.4332	4.61	5.81	8.33959
30	6.52	5	0.71903	5.6	7.2	11.0281		5.648	5	0.13426	5.49	5.85	2.37712		1.1547	5	0.1291	0.99	1.31	11.1804		3.5125	5	0.75219	2.2	4	21.4147		5.3355	5	0.63081	4.46	6.01	11.8229
31	6.26	5	0.48785	5.8	7	7.79313		5.7573	5	0.03004	5.74	5.81	0.521772		1.0875	5	0.0875	1	1.22	8.04598		2.6251	5	1.07994	1.74	4.04	41.139		4.979	5	0.5649	4.27	5.57	11.3457
32	5.66	5	0.2881	5.3	6.1	5.09011		5.7627	5	0.068	5.67	5.84	1.18		0.9822	5	0.04873	0.93	1.06	4.96131		2.1937	5	0.63765	1.8	3.32	29.0673		4.3744	5	0.31301	4.16	4.91	7.1555
33	6.3	5	0.12247	6.1	6.4	1.94397		5.5547	5	0.31859	5.09	5.94	5.7355		1.1377	5	0.08028	1.06	1.26	7.05634		3.302	5	0.31424	3	3.74	9.51666		5.3044	5	0.29107	4.94	5.57	5.48733
34	6.42	5	0.58052	5.5	7.1	9.04237		5.7827	5	0.17655	5.47	5.89	3.05307		1.1089	5	0.07467	1.01	1.22	6.7337		3.3541	5	0.98236	1.64	4.1	29.2883		4.9108	5	0.77905	3.78	5.94	15.864
35	6.36	5	0.35071	5.9	6.8	5.51431		5.632	5	0.28079	5.29	5.9	4.98562		1.1338	5	0.11724	1	1.27	10.3404		3.6687	5	0.70996	2.59	4.32	19.3518		5.0373	5	0.41382	4.45	5.58	8.21512
36	6.48	5	0.31937	6	6.9	4.92855		5.6373	5	0.3787	5.11	6	6.71775		1.1541	5	0.10178	1.02	1.27	8.81899		3.8824	5	0.44665	3.19	4.37	11.5045		5.2821	5	0.48535	4.7	6.02	9.18858
37	6.16	5	0.50794	5.5	6.8	8.24578		5.5927	5	0.17546	5.44	5.88	3.1373		1.1033	5	0.11101	0.99	1.24	10.0616		3.8092	5	0.46832	3.22	4.48	12.2944		4.8889	5	0.83859	4.23	6.05	17.1529
38	5.96	5	0.79561	4.9	7	13.3492		5.728	5	0.18033	5.5	5.93	3.14822		1.0428	5	0.15868	0.87	1.27	15.2167		3.7952	5	0.27269	3.46	4.13	7.18513		4.6739	5	0.70637	3.9	5.59	15.1131
39	6.62	5	0.249	6.3	7	3.76133		5.622	5	0.25805	5.36	6.05	4.59		1.1783	5	0.03779	1.13	1.23	3.20716		3.8404	5	0.47114	3.2	4.36	12.268		5.2278	5	0.24145	4.98	5.59	4.61858
40	5.88	5	0.41473	5.5	6.5	7.05323		5.748	5	0.12274	5.62	5.86	2.13535		1.0236	5	0.08029	0.97	1.16	7.84388		2.5881	5	0.7353	1.93	3.74	28.4108		4.4125	5	0.56633	3.9	5.31	12.8347
N: number of samples; SD: Standard deviation; Min: minimum value; Max: maximum value; CV: coefficient of variance.

## Sheet: Table S5
Table S5 The average raw spectra of coconut water samples from postharvest nuts for Wenye No.2 at developmental stage of 8 months.
Wavelength (nm)	Storage day
	0	1	2	3	4	5	6	7	8	9	10	11	12	13	14	15	16	17	18	19	20	21	22	23	24	25	26	27	28	29	30	31	32	33	34	35	36	37	38	39
2500	4.68249	4.3672	4.65048	4.5515	4.64282	4.56333	4.60589	4.43482	4.84047	4.77047	4.61403	4.55944	4.57319	4.68371	4.64373	4.58721	4.4912	4.44898	4.53522	4.66404	4.45898	4.7245	4.6041	4.83248	4.63359	4.51442	4.34696	4.43484	4.58638	4.11457	4.01656	4.45836	4.65119	4.52699	4.57558	4.60657	4.42027	4.76626	4.63718	4.61184
2497.5	4.76788	4.39445	4.69334	4.59407	4.72903	4.61609	4.54786	4.48333	4.84198	4.57581	4.70463	4.59174	4.6907	4.60717	4.70323	4.63866	4.52987	4.48376	4.5779	4.6863	4.62307	4.74987	4.64072	4.79549	4.58278	4.60462	4.50045	4.49637	4.725	4.14532	4.05227	4.63974	4.5938	4.58184	4.61814	4.5923	4.44512	4.82066	4.67806	4.66383
2495.01	4.70949	4.42464	4.7511	4.86881	4.90386	4.65405	4.50991	4.50403	4.76044	4.68679	4.82011	4.65849	4.66222	4.68372	4.61014	4.7312	4.58088	4.50127	4.66156	4.66334	4.50408	4.85505	4.73142	4.7963	4.56742	4.712	4.49468	4.57074	4.68533	4.17367	4.08965	4.65339	4.60994	4.47532	4.70348	4.6518	4.48027	4.63063	4.65649	4.59517
2492.52	4.91439	4.43389	4.61725	4.73933	4.98097	4.66514	4.49632	4.56542	4.65443	4.83571	4.92518	4.83327	4.75146	4.73831	4.6223	4.7447	4.70521	4.51138	4.63521	4.74999	4.60666	4.76385	4.65788	4.79108	4.57131	4.77969	4.61187	4.55679	4.79812	4.19002	4.11959	4.58339	4.58739	4.72007	4.80867	4.60032	4.50663	4.81429	4.65766	4.61434
2490.04	4.89395	4.49309	4.67462	4.65807	4.77227	4.67953	4.57965	4.64262	4.87341	4.8015	5.1069	4.82695	4.69478	4.75234	4.66524	4.82536	4.73254	4.52967	4.63815	4.62563	4.61933	4.97703	4.72999	4.73948	4.90499	4.75285	4.63757	4.49434	4.88436	4.19055	4.13981	4.59278	4.51168	4.76526	4.77466	4.64525	4.5159	4.99917	4.76339	4.72422
2487.56	4.98546	4.63835	4.71219	4.7409	4.72913	4.69499	4.64702	4.64278	4.87087	5.0233	4.96344	4.87908	4.70653	4.94737	4.70525	4.74967	4.76174	4.5685	4.61206	4.62425	4.7184	4.9591	4.80887	4.6736	4.82375	4.69754	4.6291	4.59419	4.95443	4.18415	4.16431	4.5671	4.56005	4.66783	4.726	4.62378	4.54747	5.00476	4.85965	4.81276
2485.09	5.09689	4.59634	4.80398	5.03962	4.66467	4.65129	4.59556	4.7905	4.84099	4.95	4.9022	4.96348	4.75566	4.90421	4.76283	4.78316	4.77119	4.65065	4.61938	4.75735	4.79006	4.82846	4.93287	4.60813	4.8024	4.63785	4.60575	4.62522	4.88512	4.18245	4.19687	4.62404	4.60902	4.72255	4.79779	4.62398	4.59023	5.02028	4.70081	4.88326
2482.62	5.1934	4.64922	4.84626	4.76114	4.66784	4.68332	4.65286	4.7362	4.89752	4.82312	4.8705	4.90488	4.88694	4.78164	4.82909	4.81161	4.8019	4.77857	4.66955	4.71385	4.80171	4.71345	4.79445	4.73855	4.87659	4.71451	4.60214	4.58145	4.98105	4.18948	4.2272	4.69027	4.74436	4.64924	4.7147	4.63741	4.57448	5.02189	4.79931	4.88059
2480.16	5.19289	4.71202	4.90761	4.8333	4.70973	4.64959	4.77085	4.73463	5.02988	4.84328	4.91302	4.80943	4.92158	4.91203	4.8545	4.77066	4.82345	4.73309	4.72523	4.72802	4.84593	4.8041	4.86569	4.76157	4.86912	4.89809	4.62657	4.5671	5.06798	4.21096	4.24346	4.68157	4.80587	4.68669	4.69512	4.80066	4.59625	4.82736	4.90264	4.98119
2477.7	5.2876	4.69631	4.85423	4.83837	4.73021	4.73566	4.80754	4.74767	5.01826	4.96317	5.01378	4.82719	4.68445	4.90451	4.85451	4.86981	4.77031	4.72886	4.68252	4.78449	4.91162	4.84793	4.93994	4.75185	4.89899	4.8188	4.73481	4.57124	5.08982	4.24006	4.24395	4.79439	4.784	4.87439	4.75398	4.74495	4.67647	4.83606	4.9917	5.08875
2475.25	5.34255	4.74689	4.87276	4.79373	4.74797	4.75531	4.90063	4.72252	5.00134	5.01224	4.89446	4.93757	4.83531	5.0215	4.92857	4.7866	4.80163	4.8614	4.77865	4.73506	4.86628	4.81558	4.85211	4.83045	5.03232	4.88091	4.72103	4.66281	5.07435	4.26771	4.24217	4.74886	4.87371	4.79743	4.76343	4.77411	4.70783	4.85941	4.96204	4.97318
2472.8	5.28237	4.8306	4.8598	4.89055	4.84979	4.93704	4.91033	4.72341	5.02533	5.19357	4.90386	4.94867	4.75679	4.93765	4.8267	4.80125	4.82441	4.9155	4.7738	4.70075	4.81395	4.83573	4.91044	4.96912	5.07833	4.77948	4.77492	4.69601	4.99904	4.29131	4.24744	4.75487	4.85934	4.80823	4.81124	4.86753	4.74123	4.79905	4.9113	4.95622
2470.36	5.15951	4.89829	4.9304	4.91056	4.7716	4.95152	4.82251	4.78401	5.0617	5.14468	4.91291	4.83396	4.84057	5.00092	4.88568	4.86127	4.70069	4.86201	4.89236	4.69126	4.88288	4.8637	5.03429	4.96012	5.05536	4.80077	4.73674	4.72571	4.93449	4.31403	4.26716	4.78488	4.88062	4.75799	4.86083	4.83691	4.76054	4.89947	4.96136	5.00937
2467.92	4.9764	4.9288	4.93233	5.02001	4.83237	4.9045	4.95817	4.75321	4.96583	5.1536	4.972	4.91084	4.87256	4.96604	4.89314	4.94573	4.95037	4.86963	4.89673	4.78487	4.85637	4.95572	4.95091	4.92789	4.98639	4.85627	4.66	4.73793	4.90282	4.33722	4.29977	4.80979	4.86262	4.83458	4.89779	4.81346	4.76416	4.90507	4.86582	4.87044
2465.48	4.98145	4.86849	4.91858	4.91973	4.9319	4.98807	4.98128	4.76309	5.0984	5.25455	5.05905	4.91707	4.98147	5.19632	4.98478	4.94597	4.79109	4.82758	4.94485	4.84863	4.76007	4.93817	4.95458	4.86618	4.96808	4.78318	4.63608	4.81525	4.87033	4.3541	4.33467	4.83432	4.90584	4.8135	4.91	4.77828	4.78488	4.99769	4.82092	4.9151
2463.05	4.98206	4.87159	4.98285	4.99786	4.98302	5.16326	4.84727	4.88912	5.10837	5.20317	4.99722	4.84457	5.14125	4.98376	4.93934	4.87755	4.77004	4.93738	4.90406	4.93159	4.74092	4.94835	5.00052	4.94313	4.91468	4.75782	4.66545	4.84635	5.03015	4.36392	4.35218	4.894	4.86706	4.91277	4.93137	4.82996	4.81935	5.11969	4.97693	5.09718
2460.63	5.0418	4.79089	4.96207	5.05951	5.0437	5.16112	5.03042	4.9364	5.19088	5.02238	4.97213	4.84924	5.03463	5.06771	4.8775	4.85968	4.78773	4.95769	4.86203	5.02864	4.79661	5.0261	4.97039	4.97769	4.82756	4.83236	4.72717	4.85066	5.11733	4.37682	4.36368	4.9533	4.86106	4.94087	4.91593	4.83675	4.73383	5.17742	4.99245	5.08301
2458.21	5.107	4.7964	4.96798	5.10656	5.09367	5.29997	4.9422	4.97697	5.1073	5.03885	4.9717	4.96697	5.13358	4.99935	4.86971	4.89525	4.8045	4.96746	4.8453	5.09314	4.85702	5.03311	5.05769	4.95362	4.80639	4.84276	4.74849	4.91681	5.11515	4.39969	4.37619	4.9177	4.93947	4.92518	5.11025	4.89822	4.85495	5.2964	5.09414	5.06331
2455.8	5.15431	4.78739	4.96103	4.98473	5.14231	5.25618	5.06684	4.93311	5.07604	5.08941	5.08063	5.02214	5.05473	4.84058	4.98071	4.84887	4.83647	4.97655	4.77823	4.98622	4.95542	5.04853	5.04124	5.11471	4.84081	4.90112	4.66756	4.94279	5.22759	4.42036	4.39585	5.03452	4.89917	4.92877	4.99994	4.8742	4.90705	5.20375	5.06619	5.02695
2453.39	5.09619	4.85677	4.93983	5.09586	5.07825	5.1367	5.04388	4.99959	5.02745	5.07739	5.08725	5.13618	5.04211	4.77537	4.92227	4.83433	4.82508	5.01091	5.01285	4.94461	4.95111	5.02176	4.94089	5.08721	5.01157	4.96672	4.65624	4.90462	5.20044	4.42871	4.41564	4.9599	4.91647	4.90294	4.94768	4.88109	4.86427	5.18072	5.05892	5.0739
2450.98	5.1881	4.84228	5.03692	5.08796	5.10527	5.06999	5.02426	4.96286	4.98929	5.26265	5.01091	5.12623	5.17142	4.82523	5.03069	4.90615	4.91618	4.89612	4.94135	4.82568	4.97379	5.19799	4.99268	5.02318	4.90287	5.0122	4.73697	4.95863	5.19527	4.43592	4.42928	4.92957	4.93256	5.13288	4.95719	4.82841	4.866	5.01991	5.01767	5.06334
2448.58	5.13848	4.86288	4.94659	5.05043	5.04505	5.12336	5.0498	4.94085	4.98717	5.27255	4.96478	5.15193	5.18052	4.94894	5.02593	5.11411	4.87991	4.82795	4.99951	4.91204	4.99437	5.14616	4.93077	5.08414	5.02805	4.95065	4.7112	4.88975	5.18424	4.45775	4.42786	4.92181	5.0546	5.01176	5.09255	4.9199	4.90157	4.98844	5.07988	5.06399
2446.18	5.13423	4.81472	4.94198	5.05415	4.98901	5.1151	4.99743	4.91795	5.17542	5.2987	5.04476	5.17924	5.16984	4.92503	5.0188	5.08763	4.91886	4.82767	4.95518	4.9262	4.99916	5.22775	4.88314	4.9995	5.14285	4.90348	4.81479	4.87139	5.19157	4.48473	4.41819	4.94979	5.16827	4.95089	5.15326	4.9538	4.95915	4.99769	5.0598	5.09332
2443.79	5.18807	4.85702	4.99087	5.114	5.01978	5.03946	5.1198	4.91036	5.16678	5.06235	5.05084	5.14718	5.1706	5.08265	4.88113	5.11753	5.07109	4.87093	4.94471	5.03114	5.02128	5.11132	5.02408	5.08838	5.08732	4.90619	4.78741	4.83654	5.21448	4.49739	4.41465	4.97144	4.98892	4.98818	5.00993	5.00205	4.89887	5.18628	5.05294	5.01201
2441.41	5.19159	4.91474	4.98401	4.94941	5.09957	5.09849	5.05629	4.91957	5.09361	5.10333	5.09593	5.00671	5.04452	5.2063	4.90641	5.02068	5.18209	4.8802	4.98378	5.02114	4.93301	5.03492	5.04384	5.03188	5.09925	4.94487	4.79022	4.80273	5.15357	4.49012	4.42274	4.98736	4.94118	4.985	4.95421	4.98947	4.89118	5.23535	5.0268	5.02444
2439.02	5.12501	4.94188	5.02637	5.08784	5.04278	5.00392	5.0135	4.94176	5.17216	5.1972	5.15109	4.95235	5.02867	5.05434	4.97758	4.97447	5.06213	4.912	4.99066	4.99559	4.90273	5.04376	5.02343	5.05973	5.03101	4.99806	4.76778	4.8198	5.05264	4.48284	4.43658	4.93925	5.02264	5.0281	4.9662	4.98436	4.79528	5.137	4.95329	5.08783
2436.65	5.08979	4.96926	5.04688	5.06228	4.96937	4.89992	4.96046	4.97762	5.11515	5.1155	5.13124	5.22036	5.13986	5.08981	5.02408	4.94604	5.14435	4.94117	5.00499	4.9724	4.9343	5.0901	5.00518	5.14412	5.0342	5.07838	4.85709	4.90429	5.17324	4.4847	4.45738	4.95106	4.95404	5.05267	4.91461	4.97522	4.78138	5.14145	5.07192	5.00219
2434.27	5.15644	4.90743	5.13062	5.05765	5.15456	4.9167	5.01442	4.96947	5.09096	5.15707	5.08485	5.27635	5.17008	5.0936	4.98995	4.96064	5.10009	5.05012	5.02872	4.97461	5.0181	5.0884	5.00013	5.04168	5.08203	5.14112	4.93425	4.9661	5.22974	4.49332	4.47956	5.03441	5.03651	5.06776	4.90239	4.96763	4.80264	5.09498	5.07738	4.99719
2431.91	5.26313	4.97801	5.37663	5.04073	5.01189	5.01173	5.05615	4.99674	5.0649	5.3491	5.06974	5.28662	5.18083	5.16241	4.95386	4.88404	5.03877	5.07437	5.04596	4.93746	4.99655	5.07457	4.95873	5.02157	5.0545	5.02635	4.97133	5.09614	5.20723	4.50237	4.49917	5.0495	4.96168	5.11931	4.91384	4.99157	4.85858	5.09057	5.15409	5.04888
2429.54	5.29043	5.05225	5.27596	5.05897	5.18739	5.07504	5.03647	5.07514	5.1084	5.30051	5.15322	5.3081	5.15254	5.13982	4.97897	4.86736	5.17596	5.07593	4.90509	4.85135	5.03794	5.11344	4.98891	4.99117	4.97766	5.15301	4.98649	5.0103	5.27746	4.50396	4.5151	5.074	4.95549	5.12702	5.03678	5.0319	4.99195	5.14541	5.19179	5.03866
2427.18	5.38349	5.10646	5.13246	5.05037	5.15359	5.11776	5.14359	4.93816	5.2439	5.39034	5.14426	5.42824	5.20337	5.17461	5.07459	4.93454	5.17189	5.05748	4.93282	4.8775	5.10934	5.12604	5.07923	4.92906	5.08532	5.10099	4.97134	5.09855	5.28455	4.50089	4.53085	5.07598	5.00614	5.09948	4.96037	5.13175	5.02739	5.24094	5.22912	5.05907
2424.83	5.40195	5.04013	5.10324	5.25415	5.08563	5.11707	4.9289	5.06779	5.35351	5.42259	5.25502	5.32333	5.08389	5.05798	5.14449	4.94391	5.12593	5.11051	5.02631	4.94789	5.16544	5.11924	5.13518	4.89861	5.00442	5.04691	5.05833	5.0577	5.38413	4.50112	4.5449	5.10229	5.0214	5.16104	5.07104	5.10025	5.01711	5.12111	5.22077	5.11248
2422.48	5.27513	4.993	5.12243	5.31434	4.97895	5.13138	4.92461	5.10153	5.37916	5.36285	5.16879	5.27659	5.17848	5.08479	5.25776	5.02809	5.08212	5.1302	5.02512	5.0302	5.11437	5.1725	5.19613	4.8936	4.99838	5.16463	5.06035	4.98177	5.47352	4.51409	4.55614	5.0088	5.02051	5.13721	5.056	5.10342	5.00263	5.16045	5.24731	5.10043
2420.14	5.28346	5.00598	5.10932	5.206	4.99708	5.13649	4.82939	4.93483	5.11763	5.24201	5.28383	5.21412	5.37857	5.04238	5.13059	5.00848	5.04276	5.13916	4.89654	4.99988	5.03238	5.26774	5.16467	4.93281	4.92328	5.21305	4.9893	4.99974	5.33925	4.5421	4.55931	5.06041	5.10692	5.07585	5.07869	5.01728	5.05449	5.10473	5.19944	5.13581
2417.79	5.47033	4.97544	5.10849	5.21323	5.15438	5.08357	4.97377	4.96376	5.14556	5.20714	5.10484	5.13319	5.31808	5.15725	5.14737	5.03829	5.00783	5.0056	4.93818	4.99371	4.92041	5.2966	5.12405	4.97589	5.03609	5.15939	5.16608	5.06794	5.32558	4.5749	4.56533	5.06286	5.13429	5.15846	5.03324	4.99177	5.0028	5.30863	5.25917	5.08598
2415.46	5.4023	4.97849	5.10631	5.1489	5.16508	5.07038	5.02307	4.89006	5.14848	5.25872	5.11585	5.41111	5.24927	5.07153	5.09369	4.97426	5.06439	5.01389	5.09023	4.96736	4.87469	5.32513	5.07105	5.02656	5.11246	5.159	5.06109	5.05234	5.28019	4.59805	4.5728	5.06999	5.2732	5.24311	5.12476	4.95294	4.96212	5.14663	5.23567	5.13166
2413.13	5.45021	5.01128	5.043	5.06576	5.18897	5.12049	5.15556	4.95836	5.16968	5.24544	5.06431	5.17353	5.17321	5.10828	5.21858	5.00774	5.03491	5.05853	5.13571	4.95643	4.9425	5.27059	5.05737	5.11602	5.1164	5.02093	4.90169	4.9955	5.25125	4.61455	4.58353	4.96359	5.13405	5.30072	5.09642	4.95416	4.98284	5.23667	5.2663	5.11052
2410.8	5.35338	5.01262	5.05929	5.02849	5.12788	5.1435	5.22804	4.87382	5.17188	5.15299	5.08279	5.1856	5.15931	5.12977	5.19826	5.14882	5.03167	4.96666	5.13545	4.96057	4.94435	5.27662	4.96238	5.13944	5.06225	5.05588	4.93917	4.97588	5.27645	4.6152	4.5907	4.94971	5.10963	5.1297	5.11101	5.00259	4.91423	5.43323	5.30354	5.13468
2408.48	5.2309	4.9929	5.02785	5.07223	5.20098	5.23149	5.1845	4.86109	5.22589	5.22586	5.26668	5.25398	5.16793	5.11318	5.21836	5.16176	5.04195	4.94346	5.10026	4.98641	5.00761	5.06668	4.9561	5.06859	5.15451	5.05712	4.98423	5.00713	5.25208	4.6025	4.58725	4.97964	5.04837	4.99664	5.15314	5.11125	4.89694	5.43019	5.34109	4.97709
2406.16	5.48246	5.08762	4.99386	5.14329	5.22082	5.2162	5.16563	4.88447	5.13077	5.3192	5.30167	5.349	5.17951	5.13226	5.29867	5.18528	4.98659	4.96826	4.93976	5.01339	5.03472	5.23135	5.00453	4.96021	5.20443	5.1141	5.06529	5.03405	5.28545	4.58718	4.58108	5.05337	5.09271	4.9948	5.16486	5.15955	4.90624	5.4802	5.19422	5.03836
2403.85	5.36092	5.05661	4.98156	5.11296	5.42199	5.26623	5.1395	4.92055	5.10348	5.33903	5.27579	5.2391	5.15587	5.12618	5.30569	5.20705	5.04599	5.00582	5.14006	5.03955	5.04058	5.23943	4.9986	4.95188	5.17397	5.14655	5.10546	4.97058	5.2855	4.57762	4.57506	5.03068	5.1623	4.91123	5.09796	5.24992	5.00313	5.35813	5.26072	5.06437
2401.54	5.17372	5.12722	5.16718	5.17251	5.25794	5.35563	4.9684	4.94927	5.23285	5.18782	5.31698	5.27635	5.23121	5.29025	5.27709	5.08748	5.05742	5.02923	5.18494	5.01889	5.03209	5.26734	5.04346	5.03805	5.25373	5.29703	5.16394	4.98851	5.28991	4.57605	4.56684	4.98404	5.25614	4.91273	5.16267	5.2074	5.03277	5.32234	5.12195	5.14125
2399.23	5.16792	5.18092	5.07021	5.28771	5.32222	5.41774	5.07795	4.99316	5.16357	5.03917	5.35562	5.22538	5.23824	5.27688	5.27594	5.14028	5.13115	5.00008	5.17222	4.96408	5.02115	5.19941	5.05988	5.09433	5.26159	5.20933	5.20453	5.08765	5.20084	4.57672	4.55805	4.97623	5.17687	5.00118	5.11994	5.30261	4.98813	5.2573	5.18284	5.15632
2396.93	5.28331	5.19223	5.10509	5.31691	5.37678	5.4327	5.18957	5.08708	5.33422	5.15524	5.25425	5.29596	5.37924	5.16931	5.28277	5.1438	5.01974	5.04811	5.09853	4.95593	5.1243	5.30532	4.98089	5.06136	5.35271	5.1611	5.13037	5.13492	5.17098	4.57903	4.55615	5.01512	5.16011	5.14355	5.11529	5.21422	5.08191	5.27236	5.19618	5.22443
2394.64	5.38866	5.08743	5.09139	5.27731	5.41805	5.32499	5.08537	4.99551	5.18151	5.17834	5.24746	5.43755	5.44481	5.11467	5.27869	5.18101	5.09211	5.04965	5.0638	4.99615	5.21034	5.27429	5.17839	5.11764	5.43959	5.16307	5.08183	4.9735	5.15781	4.5805	4.57181	5.0695	5.11692	5.13989	5.11549	5.29688	5.13042	5.1906	5.21412	5.1243
2392.34	5.33276	5.04862	5.04398	5.1266	5.28874	5.37978	5.18036	5.08732	5.21818	5.31315	5.3338	5.46167	5.33687	5.12698	5.33011	5.12709	5.1696	5.0501	5.11563	5.07381	5.13341	5.26365	5.16147	5.12962	5.37018	5.10872	5.13792	5.15308	5.2208	4.58724	4.59373	5.13709	5.04153	5.15037	5.19928	5.15221	5.31403	5.19749	5.29946	5.11646
2390.06	5.35992	5.05901	5.11193	5.14296	5.21936	5.11196	5.20342	5.20088	5.11974	5.37465	5.47976	5.4427	5.41392	5.20698	5.45857	5.09075	5.08685	5.0957	5.11405	5.08261	5.14739	5.13475	5.27768	5.23629	5.27098	5.03054	5.0587	5.05575	5.13374	4.59461	4.61369	5.17273	5.10447	5.20225	5.15843	5.12292	5.43008	5.10241	5.41137	5.3034
2387.77	5.54023	5.08152	5.148	5.23606	5.23722	5.0648	5.13898	5.2602	5.0788	5.41359	5.41884	5.38447	5.51003	5.22458	5.4031	5.04617	5.12197	5.05517	5.11976	5.06749	5.13754	5.16285	5.35659	5.1541	5.12002	5.04475	5.02108	5.0314	5.26836	4.60333	4.61805	5.04885	5.10201	5.13751	5.14109	5.26859	5.39878	5.10749	5.39563	5.32025
2385.5	5.36084	5.09313	5.34856	5.28882	5.2049	5.20674	5.18794	5.21854	5.19128	5.42725	5.39717	5.41706	5.53329	5.24053	5.31888	5.01057	5.12514	5.00615	5.13913	5.07912	5.16437	5.21249	5.32949	5.27153	5.12521	5.12562	5.07489	5.02515	5.16051	4.60445	4.61298	5.02415	5.15355	5.08902	5.16119	5.21079	5.3892	5.18092	5.3489	5.14237
2383.22	5.43607	5.03611	5.25213	5.29284	5.29931	5.19829	5.32839	5.19757	5.27424	5.43375	5.30343	5.35529	5.32132	5.29567	5.3404	4.92355	5.08221	5.11671	5.12529	5.11366	5.14331	5.14244	5.30791	5.19442	5.13083	5.14935	5.04002	5.12563	5.1812	4.60502	4.60309	5.05792	5.1754	5.11645	5.22517	5.15164	5.27895	5.17964	5.3155	5.14389
2380.95	5.33316	5.04978	5.18482	5.42493	5.15034	5.31829	5.247	5.17679	5.31517	5.30545	5.37357	5.37952	5.25081	5.55072	5.16412	4.90429	5.10849	5.15456	5.12176	5.02837	5.21535	5.12584	5.17826	5.24491	5.13588	5.18261	5.07477	5.19196	5.23497	4.61231	4.59305	5.04637	5.28729	5.14628	5.36477	5.34067	5.17238	5.24069	5.34571	5.28299
2378.69	5.54242	5.00786	5.33119	5.42449	5.2113	5.3377	5.10943	5.09515	5.07323	5.38681	5.41167	5.50343	5.20971	5.34266	5.19321	4.96562	5.21499	5.23505	5.18755	5.00341	5.21295	5.32792	5.14961	5.1665	5.21703	5.18939	5.09889	5.15841	5.29075	4.6256	4.59399	5.12013	5.24702	5.19264	5.30609	5.3194	5.19077	5.25794	5.38601	5.14393
2376.43	5.54503	5.17435	5.35763	5.41359	5.22793	5.24507	5.17156	5.25431	5.12567	5.34828	5.50143	5.57482	5.24736	5.51936	5.35233	5.08821	5.13189	5.24157	5.08961	4.99426	5.2193	5.16977	5.11843	5.14727	5.30635	5.19334	5.16148	5.12775	5.35077	4.63772	4.60882	5.1798	5.31883	5.23143	5.23168	5.21857	5.14478	5.31747	5.25125	5.10194
2374.17	5.44174	5.25277	5.31361	5.41191	5.19993	5.27874	5.19453	5.13425	5.08613	5.29454	5.35871	5.7463	5.45194	5.50359	5.27303	5.23509	5.10762	5.11746	5.07516	4.99596	5.19404	5.28934	5.1832	5.09358	5.33538	5.22946	5.11909	5.01489	5.18424	4.65011	4.64474	5.21999	5.26329	5.15748	5.23897	5.24812	5.1233	5.29256	5.28251	5.09568
2371.92	5.31972	5.24512	5.2793	5.30971	5.27177	5.26152	5.15161	5.19626	5.17631	5.28954	5.42781	5.6876	5.24413	5.41581	5.30465	5.29818	5.19569	5.06034	4.97753	5.02435	5.09714	5.30951	5.28944	5.24758	5.27311	5.06185	5.05659	5.04806	5.15041	4.66925	4.69178	5.12204	5.29085	5.17351	5.24234	5.23596	5.06194	5.3516	5.27437	5.15038
2369.67	5.4304	5.0375	5.49025	5.12058	5.32484	5.31718	5.11262	5.2296	5.28191	5.37753	5.35703	5.54556	5.17446	5.46598	5.23733	5.26246	5.2255	5.0709	5.01492	5.03164	5.02712	5.28254	5.30863	4.98608	5.24581	5.20325	5.05057	4.96712	5.17299	4.68971	4.73056	5.14348	5.20063	5.10546	5.19938	5.2114	5.04858	5.32408	5.25719	5.08649
2367.42	5.47463	5.04431	5.2882	5.17616	5.26341	5.19429	5.11566	5.14138	5.25227	5.41246	5.42781	5.3688	5.17811	5.62412	5.19398	5.25639	5.34788	5.10248	5.03224	4.9035	5.01069	5.44216	5.29027	5.10833	5.22336	5.12643	5.02409	4.96521	5.19938	4.70184	4.73549	5.00853	5.196	5.15753	5.14302	5.13756	5.06856	5.23854	5.29988	5.19824
2365.18	5.4145	5.12391	5.27888	5.1253	5.3516	5.22572	5.07332	5.22184	5.25053	5.41502	5.46194	5.31911	5.21194	5.6611	5.22551	5.32969	5.35365	5.11277	5.11766	4.90223	5.06986	5.30388	5.2349	5.19404	5.11821	5.17554	5.02677	4.94111	5.25506	4.69807	4.69655	4.97203	5.17084	5.2023	5.15548	5.08543	5.09417	5.22907	5.30266	5.14891
2362.95	5.26472	5.16597	5.33407	5.20136	5.29292	5.21903	5.10161	5.13922	5.34361	5.38225	5.39018	5.33475	5.36033	5.36833	5.15637	5.39411	5.25671	5.18081	5.21557	5.07304	5.04229	5.33269	5.16358	5.199	5.15749	5.19146	5.06605	4.91778	5.22744	4.66729	4.65915	5.02842	5.11937	5.16687	5.28566	5.08384	5.12521	5.18258	5.30438	5.19242
2360.72	5.28323	5.15807	5.26482	5.2214	5.36268	5.04154	5.13314	5.13045	5.27619	5.40934	5.45584	5.37252	5.45583	5.44925	5.18808	5.24661	5.2856	5.16016	5.19707	5.06064	5.04272	5.3342	5.14352	5.16934	5.13961	5.25657	5.17194	4.89693	5.23358	4.63673	4.63647	5.06006	5.09973	5.22058	5.14421	5.1382	5.01852	5.2419	5.19387	5.1507
2358.49	5.18468	5.06845	5.23703	5.16007	5.39174	5.1507	5.04911	5.07816	5.21475	5.45535	5.23186	5.31462	5.37656	5.60003	5.13847	5.1798	5.29774	5.11972	5.19173	5.04725	5.12755	5.31711	5.04645	5.1264	5.11423	5.24161	5.1878	4.89375	5.27744	4.62387	4.63861	5.10292	5.14606	5.21538	5.15682	5.04664	5.0259	5.30405	5.13299	5.12774
2356.27	5.22184	5.0762	5.15895	5.26737	5.46384	5.24982	5.07721	5.16791	5.19741	5.44675	5.29617	5.32183	5.34	5.2729	5.14052	5.18738	5.17787	5.14486	5.06607	4.99567	5.16034	5.24311	5.15469	5.1605	5.18622	5.25142	5.23008	4.93888	5.28723	4.62381	4.65864	5.13582	5.18119	5.19781	5.14965	5.14233	5.0474	5.43611	5.22925	5.17254
2354.05	5.18624	5.12107	5.18661	5.29874	5.37345	5.11469	5.04169	5.17966	5.03925	5.35036	5.41285	5.33491	5.32977	5.20442	5.08052	5.2344	5.1127	5.04404	5.05085	4.95799	5.1035	5.22785	5.05985	5.18159	5.32071	5.30096	5.12508	4.96306	5.27201	4.64211	4.68133	5.16413	5.16995	5.16854	5.10999	5.0989	5.09096	5.48495	5.25044	5.12938
2351.83	5.21114	5.12746	5.31293	5.35058	5.39105	5.18848	5.0502	5.1928	5.14467	5.37802	5.53418	5.46779	5.30355	5.27202	5.04304	5.14154	5.17411	4.99996	5.0844	4.95943	5.09785	5.28991	5.07704	5.21246	5.35563	5.18658	5.10657	5.03451	5.2736	4.65604	4.69877	5.19455	5.19062	5.21645	5.09106	5.16601	5.1994	5.43618	5.32123	5.24827
2349.62	5.25232	5.11581	5.23575	5.52995	5.29675	5.10428	5.07763	5.17896	5.13374	5.45072	5.44592	5.46032	5.27668	5.49551	5.11879	5.09109	5.17984	5.02947	5.14131	4.99944	5.14448	5.40391	5.04099	5.17113	5.24004	5.17547	5.09519	5.14849	5.22662	4.66182	4.70664	5.10614	5.17885	5.12646	5.11169	5.17835	5.16247	5.33259	5.32043	5.35616
2347.42	5.15632	5.17173	5.26907	5.59863	5.37253	5.16907	5.08135	5.20546	5.07695	5.4085	5.45492	5.40417	5.47849	5.34596	5.2149	5.0418	5.20036	5.00891	5.07164	5.06528	5.18098	5.40782	5.0592	5.07864	5.58365	5.34	5.046	5.10663	5.10118	4.67203	4.70863	4.96114	5.07827	5.05492	5.15468	5.20444	5.17292	5.22372	5.41726	5.22981
2345.22	5.22545	5.12332	5.24804	5.33311	5.38256	5.1462	5.04457	5.24526	5.15086	5.53257	5.35647	5.46795	5.26683	5.33655	5.17048	5.03362	5.27959	5.10442	5.12285	5.05948	5.24447	5.42414	5.09979	5.13297	5.3325	5.36809	5.03999	5.08057	5.08302	4.68788	4.71189	4.99159	5.11785	5.09219	5.18584	5.23964	5.10318	5.26735	5.65645	5.33243
2343.02	5.31211	5.13023	5.26465	5.37024	5.29996	5.15231	5.19625	5.19161	5.09488	5.32104	5.28683	5.45238	5.34928	5.31711	5.28122	5.04226	5.18208	5.0953	5.19551	5.1053	5.33899	5.28873	5.11389	5.09606	5.41624	5.43099	5.08746	4.99974	5.03809	4.70294	4.71421	4.93352	5.23291	5.13372	5.26713	5.26723	5.13204	5.24548	5.54603	5.22787
2340.82	5.38248	5.16058	5.28972	5.30853	5.27581	5.24544	5.20939	5.18725	5.11818	5.41702	5.2172	5.39175	5.26132	5.26938	5.3419	5.11116	5.15391	5.19232	5.23168	4.99561	5.34935	5.39242	5.11911	5.17071	5.34403	5.46041	5.13157	5.1323	5.09	4.69942	4.70969	4.9829	5.21641	5.32378	5.19731	5.19039	5.15188	5.20281	5.52625	5.20464
2338.63	5.4122	5.16922	5.25109	5.38765	5.30126	5.35569	5.23838	5.22415	5.09255	5.33851	5.25825	5.38787	5.31384	5.27682	5.50895	5.20547	5.22055	5.31813	5.27374	5.00777	5.40141	5.36743	5.10468	5.18257	5.28182	5.60174	5.16022	5.15066	5.06619	4.68512	4.70116	4.99692	5.22702	5.47927	5.20613	5.12118	5.27237	5.27543	5.35964	5.15604
2336.45	5.36815	5.07163	5.33857	5.19741	5.35569	5.41933	5.21209	5.30939	5.05669	5.2177	5.41014	5.41126	5.2741	5.3218	5.4033	5.24184	5.31381	5.25769	5.33972	5.02459	5.35877	5.42078	5.04265	5.13282	5.17153	5.49804	5.23056	5.21717	4.99605	4.68185	4.70026	5.04098	5.29872	5.51201	5.15174	5.06272	5.30932	5.1865	5.2598	5.2409
2334.27	5.30147	5.07969	5.36752	5.32964	5.42566	5.26769	5.20534	5.23448	5.14874	5.15995	5.4016	5.45717	5.3627	5.49551	5.27555	5.21374	5.18868	5.11299	5.2187	5.09984	5.3802	5.48432	5.04429	5.18012	5.13486	5.08998	5.31128	5.14187	5.08187	4.69856	4.70131	5.03499	5.32409	5.36166	5.17091	5.02867	5.24579	5.25335	5.18393	5.12807
2332.09	5.55011	5.11752	5.25962	5.26041	5.41536	5.18229	5.17032	5.14519	5.2177	5.24842	5.3959	5.54728	5.56829	5.42685	5.21275	5.18602	5.16318	5.06967	5.28616	5.12215	5.29493	5.391	5.11575	5.16051	5.29095	5.21422	5.26797	5.04712	5.06063	4.72596	4.709	5.01813	5.27536	5.3738	5.10395	5.05282	5.1489	5.34391	5.16035	5.21626
2329.92	5.35916	5.12665	5.35529	5.29709	5.5164	5.1894	5.07931	5.07796	5.30687	5.26938	5.48516	5.62428	5.39464	5.47046	5.08952	5.16224	5.13396	5.10825	5.22226	5.18261	5.20506	5.25802	5.30166	5.10665	5.16479	5.42371	5.19824	5.05668	5.06171	4.74342	4.71848	5.01228	5.38713	5.3073	5.04421	5.07698	5.16639	5.29513	5.27467	5.23445
2327.75	5.27828	5.13064	5.40531	5.19294	5.57857	5.19251	5.09708	5.01752	5.40902	5.29429	5.44456	5.51331	5.58959	5.50635	5.17018	5.09519	5.14839	5.10259	5.17601	5.19419	5.17605	5.37264	5.34704	5.1142	5.20276	5.50995	5.30009	5.05091	5.15134	4.75381	4.73469	5.01066	5.39477	5.21553	4.99427	5.18211	5.28802	5.29713	5.32661	5.41387
2325.58	5.26484	5.09985	5.27388	5.19631	5.44618	5.14549	5.11225	5.10538	5.40615	5.33139	5.4523	5.43475	5.52112	5.49707	5.23112	5.01853	5.09188	5.06865	5.16411	5.21791	5.30268	5.30467	5.37644	5.12002	5.35259	5.3023	5.26207	5.05024	5.03246	4.7415	4.75722	5.02212	5.27591	5.15775	4.98996	5.19907	5.31713	5.24626	5.42815	5.44524
2323.42	5.23897	5.11405	5.2572	5.20881	5.54902	5.11033	5.24852	5.09941	5.28993	5.31406	5.48594	5.38693	5.51096	5.46621	5.36712	5.06048	5.08276	5.04496	5.16349	5.092	5.3462	5.40457	5.30946	5.18002	5.32513	5.17621	5.32522	5.11432	5.13835	4.71892	4.7731	5.03635	5.16867	5.15509	5.04036	5.25229	5.28813	5.32498	5.47809	5.24933
2321.26	5.25476	5.13854	5.35774	5.26895	5.4597	5.20673	5.24307	5.11144	5.31214	5.31457	5.58204	5.44652	5.47418	5.42637	5.3352	5.03879	5.26284	4.98456	5.23696	5.04188	5.3537	5.27369	5.2178	5.25255	5.40142	5.12109	5.33168	5.16323	5.09281	4.72105	4.78193	5.04339	5.17858	5.20789	5.13805	5.31606	5.30252	5.36644	5.43067	5.21488
2319.11	5.265	5.18129	5.41967	5.34335	5.39638	5.22435	5.18458	5.0658	5.31629	5.24877	5.5402	5.47285	5.36732	5.40244	5.24093	5.05991	5.21958	5.03744	5.20844	5.12121	5.48504	5.2817	5.243	5.1869	5.41358	5.13049	5.25902	5.23798	5.0881	4.73683	4.78477	5.03197	5.08309	5.18592	5.21717	5.30521	5.24272	5.34249	5.41454	5.23477
2316.96	5.29624	5.21441	5.56177	5.32184	5.36392	5.25334	5.06266	5.06539	5.37822	5.27249	5.25415	5.33531	5.54931	5.3774	5.35329	5.10228	5.21346	5.10856	5.20141	5.16518	5.41067	5.16271	5.12669	5.16507	5.37365	5.2607	5.30004	5.23491	5.10429	4.74489	4.78319	5.03442	5.12484	5.22472	5.26497	5.32113	5.31728	5.30406	5.3649	5.3317
2314.81	5.26297	5.15973	5.46559	5.32174	5.32704	5.18535	5.06667	5.07066	5.29607	5.32853	5.30699	5.39215	5.58218	5.42414	5.2615	5.15155	5.15847	5.14066	5.1005	5.25861	5.46194	5.12121	5.27071	5.27345	5.40442	5.4327	5.32418	5.22882	5.11133	4.75283	4.78348	4.9871	5.13734	5.30332	5.18429	5.26866	5.22456	5.19813	5.2616	5.33174
2312.67	5.30239	5.19643	5.39763	5.39445	5.35494	5.19033	5.04817	5.04843	5.35535	5.45233	5.3249	5.48857	5.46	5.46871	5.20323	5.13269	5.20757	5.20118	5.21719	5.24872	5.41067	5.14961	5.2887	5.30916	5.43711	5.30723	5.29421	5.16807	5.14063	4.76379	4.73385	4.99864	5.11552	5.26664	5.07162	5.31502	5.12082	5.13689	5.20205	5.26451
2310.54	5.33459	5.21606	5.40355	5.35612	5.31112	5.20699	5.21214	5.04471	5.35276	5.37493	5.36115	5.47924	5.40207	5.43728	5.16015	5.12377	5.27969	5.15181	5.16462	5.26944	5.4122	5.28983	5.31747	5.2066	5.37629	5.27545	5.21706	5.14212	5.11456	4.77233	4.74027	5.00907	5.24108	5.31785	5.21469	5.31265	5.33706	5.15032	5.32913	5.26787
2308.4	5.2773	5.28425	5.33579	5.3118	5.37712	5.22509	5.14916	5.11098	5.20092	5.26937	5.29837	5.48183	5.38469	5.39855	5.20185	5.12172	5.20495	5.16	5.16282	5.21421	5.33891	5.31285	5.24489	5.247	5.39079	5.38379	5.26158	5.10723	5.10253	4.7613	4.76319	5.07664	5.23322	5.23569	5.10307	5.21482	5.36261	5.26263	5.25318	5.24881
2306.27	5.37257	5.22565	5.25652	5.29579	5.39037	5.1133	5.20864	5.03998	5.25983	5.29083	5.2875	5.54881	5.45512	5.21629	5.29942	5.08544	5.17039	5.2401	5.20227	5.23414	5.35296	5.34955	5.11862	5.24471	5.39734	5.44471	5.37328	5.02694	5.09249	4.74748	4.79145	5.07869	5.20804	5.20836	5.07851	5.28813	5.29931	5.18983	5.21485	5.28102
2304.15	5.3761	5.17696	5.23294	5.41112	5.37182	5.04805	5.14815	5.10553	5.35699	5.28707	5.22593	5.6611	5.38962	5.28042	5.22479	5.14545	5.17156	5.28352	5.20352	5.19931	5.34977	5.4231	5.21007	5.26294	5.36564	5.50284	5.40595	5.01156	5.14625	4.74081	4.85004	5.06269	5.18927	5.18511	5.14647	5.25129	5.23316	5.15988	5.26194	5.08423
2302.03	5.37975	5.26049	5.12037	5.37581	5.27586	5.05811	5.18543	5.06661	5.40929	5.31808	5.25386	5.65846	5.38765	5.23796	5.12999	5.06319	5.15039	5.25467	5.18822	5.03179	5.33936	5.4567	5.20173	5.00542	5.28324	5.43115	5.37615	5.09737	5.13478	4.73933	4.82522	5.08701	5.22427	5.24927	5.20104	5.25279	5.39084	5.16217	5.35902	5.05135
2299.91	5.43253	5.23496	5.21612	5.40268	5.33812	5.01248	5.11462	5.14095	5.35447	5.32783	5.35358	5.48065	5.29931	5.29814	5.04925	5.20084	5.14125	5.16461	5.15888	5.08553	5.48302	5.40353	5.24173	5.14712	5.19425	5.28042	5.28196	5.16578	5.03812	4.74704	4.79732	5.13143	5.15141	5.32056	5.23369	5.20029	5.36265	5.17083	5.31955	5.13284
2297.79	5.56596	5.38175	5.2876	5.41047	5.25347	5.05108	5.13785	5.20874	5.29692	5.45046	5.42167	5.46375	5.38765	5.37421	5.22476	5.25365	5.17331	5.1274	5.18902	5.29334	5.49869	5.27009	5.2343	5.18914	5.23847	5.23521	5.21204	5.12921	5.11398	4.7486	4.77915	4.99553	5.16009	5.32144	5.11547	5.11597	5.30366	5.29012	5.32418	5.15564
2295.68	5.43983	5.32425	5.2337	5.38826	5.1544	5.12499	5.2557	5.31238	5.27821	5.40398	5.39351	5.47247	5.33331	5.39984	5.25289	5.21603	5.14847	5.20028	5.08827	5.2788	5.52719	5.35727	5.19399	5.24257	5.22439	5.43313	5.1523	5.03734	5.08282	4.74173	4.77021	4.981	5.28434	5.23376	5.20202	5.20069	5.31126	5.28432	5.32741	5.10412
2293.58	5.31702	5.23839	5.22127	5.26853	5.2532	5.18119	5.25575	5.22218	5.26343	5.46041	5.23922	5.48893	5.41441	5.36552	5.3295	5.20035	5.12618	5.13302	5.04854	5.24963	5.56911	5.39261	5.27039	5.12817	5.26184	5.30656	5.15932	5.07507	5.0937	4.73837	4.75623	5.08234	5.31788	5.15215	5.13241	5.19404	5.20403	5.26325	5.46798	5.1469
2291.48	5.36936	5.09639	5.29735	5.24048	5.24213	5.14737	5.20488	5.14858	5.25313	5.42496	5.20402	5.46273	5.41536	5.39642	5.19544	5.10999	5.16822	5.07115	5.07427	5.23817	5.47381	5.39989	5.32878	5.24426	5.35996	5.45883	5.16102	5.16152	5.1183	4.73363	4.73947	5.03974	5.30954	5.15595	5.19291	5.29063	5.23181	5.33094	5.48992	5.30176
2289.38	5.33699	5.08738	5.22914	5.27487	5.35526	5.16543	5.15666	5.12647	5.24181	5.2767	5.30359	5.44081	5.32573	5.2112	5.20969	5.15456	5.2251	5.11185	5.22332	5.31139	5.46375	5.51344	5.32879	5.20967	5.40273	5.33816	5.20986	5.09307	5.13143	4.72577	4.72429	4.94842	5.3245	5.10886	5.20065	5.24766	5.22594	5.27115	5.4275	5.26313
2287.28	5.34292	5.17695	5.30028	5.24171	5.44303	5.16345	5.15076	5.05582	5.22147	5.32519	5.36552	5.30989	5.36892	5.38304	5.30626	5.08314	5.19499	5.12105	5.23794	5.27115	5.38662	5.46739	5.33872	5.18062	5.35333	5.35793	5.21701	5.15799	5.13366	4.70844	4.70649	5.00866	5.27832	5.20774	5.2764	5.32937	5.37352	5.28545	5.40533	5.31843
2285.19	5.34362	5.35238	5.34576	5.2222	5.37477	5.20316	5.09421	5.04565	5.29127	5.31691	5.46376	5.36172	5.32245	5.35518	5.30944	5.2291	5.21401	5.17204	5.15951	5.25094	5.48321	5.38116	5.31609	5.22412	5.30153	5.28869	5.1489	5.11863	5.1557	4.70851	4.71301	4.98565	5.30856	5.30999	5.29037	5.21919	5.27536	5.1547	5.34346	5.28714
2283.11	5.36092	5.40142	5.24048	5.22572	5.28051	5.23794	5.08313	5.11204	5.26372	5.32123	5.29814	5.26588	5.44084	5.37625	5.22511	5.13733	5.23082	5.22904	5.06481	5.35865	5.47615	5.43217	5.2235	5.14213	5.52094	5.30642	5.14113	5.10834	5.14329	4.72487	4.73931	4.986	5.45025	5.25113	5.18992	5.14074	5.38367	5.35001	5.33993	5.24872
2281.02	5.31672	5.37177	5.23966	5.23651	5.34223	5.16859	5.12578	5.17748	5.29208	5.28298	5.20947	5.17038	5.3421	5.39005	5.16688	5.12674	5.19381	5.19769	5.04636	5.21504	5.49063	5.45204	5.19387	5.20248	5.50521	5.36841	5.21647	5.08767	5.07762	4.76257	4.77188	4.95939	5.27564	5.20691	5.18608	5.2191	5.34934	5.28769	5.29477	5.1752
2278.94	5.42445	5.36093	5.15106	5.22834	5.22879	5.1319	5.11235	5.11997	5.32082	5.32758	5.36256	5.09968	5.41186	5.15767	5.16488	5.15857	5.17846	5.24078	5.09933	5.17955	5.50635	5.23891	5.15763	5.13226	5.45194	5.42613	5.11429	5.07868	5.0637	4.79145	4.79318	4.94925	5.24169	5.18073	5.24489	5.08275	5.21627	5.3075	5.34245	5.16615
2276.87	5.40893	5.25997	5.19512	5.15626	5.31396	5.15939	5.10688	5.05125	5.47712	5.38036	5.30753	5.14093	5.43262	5.21303	5.15399	5.14323	5.16743	5.16751	5.14021	5.15626	5.49488	5.27818	5.125	5.27192	5.47213	5.36489	5.11389	5.0882	5.07097	4.79665	4.7983	4.94294	5.2817	5.14586	5.34978	5.05722	5.18706	5.2431	5.34539	5.18008
2274.8	5.62793	5.2437	5.25966	5.14917	5.27846	5.13923	5.11397	5.04604	5.41092	5.29148	5.27524	5.18009	5.38224	5.13841	5.20382	5.09185	5.21523	5.1855	5.22456	5.18619	5.38293	5.35763	5.13358	5.19374	5.36592	5.3595	5.16835	5.12554	5.10039	4.80028	4.78793	4.93879	5.30235	5.1669	5.32519	5.16996	5.19936	5.25943	5.35369	5.10758
2272.73	5.53645	5.24338	5.22836	5.23781	5.31845	5.06507	5.04688	5.07168	5.26469	5.25705	5.34067	5.24503	5.49693	5.21177	5.32727	5.11311	5.21066	5.18616	5.20423	5.24559	5.35551	5.52926	5.1628	5.19291	5.29519	5.39414	5.11733	5.15621	5.18008	4.8072	4.77983	4.9486	5.30818	5.12765	5.16208	5.16505	5.24056	5.22181	5.2848	5.20495
2270.66	5.37892	5.18829	5.20573	5.25193	5.26733	5.05047	5.14065	5.14587	5.4069	5.23176	5.40455	5.30983	5.45717	5.28548	5.21896	5.1393	5.26621	5.19268	5.19028	5.25825	5.3528	5.36487	5.18558	5.14861	5.40222	5.25708	5.14243	5.22664	5.0851	4.80047	4.76833	4.97375	5.16461	5.13633	5.10214	5.18138	5.18558	5.21774	5.22602	5.27287
2268.6	5.35439	5.22098	5.13873	5.26987	5.30009	5.11428	5.11601	5.17172	5.2857	5.25415	5.43264	5.24183	5.37567	5.29302	5.27927	5.18476	5.28381	5.17345	5.19649	5.28746	5.32307	5.49006	5.06924	5.20202	5.32104	5.28056	5.14241	5.18624	5.08349	4.80887	4.77808	5.0319	5.20518	5.13614	5.10833	5.22139	5.34432	5.23307	5.25073	5.28831
2266.55	5.30702	5.18933	5.16424	5.1481	5.25253	5.07794	5.20777	5.13949	5.24084	5.19638	5.52817	5.24516	5.30369	5.47526	5.25948	5.20325	5.23503	5.08218	5.16929	5.29327	5.37357	5.42499	5.03404	5.16452	5.49041	5.24967	5.23115	5.15914	5.01792	4.81355	4.7981	5.00708	5.18537	5.19801	5.10283	5.30444	5.26674	5.16334	5.25366	5.27337
2264.49	5.32566	5.1793	5.19577	5.17088	5.20555	5.25894	5.13976	5.17326	5.15688	5.19336	5.40728	5.32161	5.26953	5.50636	5.34006	5.19437	5.19245	5.06582	5.23681	5.23984	5.41198	5.44784	5.12273	5.15374	5.34378	5.34572	5.28879	5.14571	4.9633	4.81434	4.80608	5.08951	5.19897	5.26984	5.1265	5.30302	5.27883	5.16727	5.27118	5.26816
2262.44	5.40457	5.2193	5.18623	5.32976	5.09432	5.20487	5.1223	5.287	5.32937	5.22053	5.38617	5.31162	5.30723	5.49571	5.29094	5.19141	5.1844	5.06391	5.2763	5.2232	5.34907	5.33731	5.13227	5.24521	5.25908	5.37374	5.30811	5.19389	4.90619	4.81477	4.80299	5.07142	5.13614	5.28264	5.15562	5.28648	5.26836	5.21101	5.23082	5.24164
2260.4	5.32123	5.23365	5.23512	5.40848	5.14007	5.15426	5.12743	5.21136	5.20309	5.26137	5.30411	5.39607	5.44146	5.38668	5.22347	5.10327	5.16009	5.07139	5.33434	5.19052	5.48349	5.33715	5.12064	5.32438	5.34778	5.31085	5.27217	5.0862	4.90938	4.79557	4.81175	5.03994	5.1842	5.34351	5.20681	5.25829	5.30277	5.17155	5.27057	5.23675
2258.36	5.35535	5.25775	5.25841	5.34789	5.3019	5.14646	5.14162	5.23509	5.20009	5.21317	5.37319	5.43199	5.38124	5.30967	5.16108	5.06415	5.12935	5.0938	5.21872	5.24181	5.34386	5.24431	5.11191	5.3174	5.35535	5.37165	5.3436	5.12059	4.9681	4.78194	4.82815	5.01445	5.23326	5.2028	5.18625	5.34924	5.32589	5.1525	5.32373	5.22184
2256.32	5.26115	5.15966	5.33819	5.34068	5.34386	5.04674	5.17148	5.15842	5.31102	5.24261	5.33013	5.44946	5.39575	5.24635	5.10046	5.02208	5.10807	5.13016	5.10772	5.31659	5.26557	5.29846	5.11035	5.24178	5.44982	5.40353	5.3593	5.22155	5.01429	4.76531	4.84344	4.99649	5.20634	5.14807	5.17124	5.40301	5.26193	5.08248	5.35412	5.33793
2254.28	5.14002	5.2023	5.33433	5.42062	5.23932	5.03212	5.18465	5.11162	5.3468	5.32032	5.27725	5.34631	5.35824	5.24573	5.08949	5.02181	5.11666	5.12357	5.07066	5.27201	5.29204	5.2836	5.1141	5.21435	5.39722	5.34768	5.43222	5.22184	5.17031	4.7538	4.85713	4.98057	5.18549	5.14628	5.1458	5.28737	5.31046	5.24663	5.3533	5.31009
2252.25	5.21526	5.15956	5.30544	5.29694	5.25505	5.0305	5.15078	5.10013	5.31891	5.23673	5.24326	5.24826	5.33624	5.33975	5.1544	5.05821	5.08493	5.06387	5.05839	5.2141	5.4117	5.29707	5.131	5.10637	5.43018	5.35849	5.40226	5.23077	5.15368	4.74553	4.85891	4.98442	5.23288	5.12749	5.14928	5.32062	5.32573	5.29971	5.33786	5.32764
2250.23	5.33071	5.08151	5.27898	5.58659	5.20902	5.12255	5.08831	5.0672	5.33259	5.27525	5.20527	5.2485	5.325	5.21338	5.19418	5.05044	5.10578	5.02938	5.08131	5.24865	5.41126	5.30874	5.1347	5.13692	5.51427	5.35381	5.36083	5.28283	5.10808	4.74826	4.83267	4.99865	5.33173	5.18909	5.12213	5.37222	5.4163	5.29104	5.39936	5.55594
2248.2	5.36519	5.12096	5.35147	5.34705	5.18397	5.09522	5.06093	5.04543	5.31919	5.3122	5.18426	5.31993	5.25938	5.1787	5.26961	5.16933	5.12022	5.01011	5.05625	5.30832	5.33153	5.19421	5.1657	5.19801	5.45794	5.22849	5.33176	5.21875	5.09184	4.74133	4.80457	5.02799	5.33584	5.30239	5.06256	5.2136	5.242	5.33599	5.33641	5.44244
2246.18	5.35185	5.20532	5.32805	5.33453	5.09791	5.10332	5.03298	4.96747	5.37834	5.25639	5.14685	5.31962	5.26531	5.28626	5.23768	5.07327	5.08876	4.98999	5.13134	5.21003	5.43446	5.18066	5.09346	5.19251	5.54637	5.29103	5.3416	5.23631	5.13066	4.73077	4.77718	5.08229	5.27069	5.181	5.13251	5.1877	5.19422	5.41603	5.26614	5.40257
2244.17	5.3032	5.2263	5.35845	5.32114	5.1521	5.00072	5.03732	4.95281	5.35801	5.24914	5.14978	5.21179	5.28752	5.21456	5.18829	5.11688	4.98178	4.99488	5.109	5.20088	5.44847	5.25176	5.12444	5.23209	5.50423	5.40383	5.2258	5.29025	5.07185	4.71866	4.74948	5.16302	5.23655	5.27734	5.06453	5.34166	5.20654	5.3414	5.21027	5.42658
2242.15	5.42921	5.30783	5.34173	5.19865	5.15702	5.02884	5.05783	4.99327	5.40593	5.24516	5.14779	5.31322	5.25151	5.31622	5.18276	5.07787	5.06384	5.02731	5.08686	5.22361	5.52394	5.20845	5.09621	5.19905	5.4752	5.27402	5.22251	5.35606	5.08604	4.71611	4.75089	5.10976	5.16132	5.29414	5.12918	5.2804	5.19915	5.31214	5.24562	5.28583
2240.14	5.40845	5.35535	5.33294	5.25584	5.17216	4.99656	5.06072	5.04926	5.27534	5.22548	5.15274	5.22053	5.24011	5.29373	5.21003	5.0539	5.0537	5.04169	5.03607	5.23317	5.43518	5.1894	4.98673	5.14304	5.3876	5.18616	5.30641	5.47656	5.0921	4.73353	4.76711	5.11001	5.06076	5.36878	5.14913	5.22849	5.12181	5.3108	5.29735	5.3176
2238.14	5.30423	5.3361	5.35728	5.22887	5.23745	4.98258	5.15024	5.01619	5.14296	5.24992	5.19276	5.23956	5.24992	5.16567	5.29244	5.05174	5.14318	5.02204	4.99014	5.23768	5.45194	5.17728	5.00557	5.06712	5.40419	5.24098	5.26342	5.4107	5.07584	4.76737	4.80295	5.06124	5.05097	5.33035	5.10908	5.42326	5.09698	5.27136	5.31508	5.26856
2236.14	5.36907	5.41485	5.33897	5.32439	5.28991	4.95885	5.15277	4.99398	5.18691	5.26036	5.24916	5.12198	5.24379	5.24474	5.3311	5.0074	5.02444	4.99638	4.9517	5.23593	5.44402	5.11572	5.01695	5.09323	5.36486	5.284	5.20825	5.32257	5.03178	4.78012	4.82984	4.97964	5.09292	5.35235	5.11294	5.20623	5.23291	5.38374	5.30458	5.34038
2234.14	5.29096	5.27954	5.24873	5.20038	5.30698	4.92917	5.16715	5.06308	5.22174	5.25878	5.25096	5.19983	5.23799	5.1854	5.1672	4.98244	5.01327	4.96543	4.98222	5.29191	5.45503	5.2299	5.07856	5.12336	5.45003	5.2505	5.17344	5.24762	5.01678	4.7815	4.84003	4.93522	5.18324	5.17559	5.02873	5.26241	5.29807	5.34744	5.37762	5.27715
2232.14	5.35159	5.22415	5.1787	5.11973	5.26249	4.92009	5.12362	5.02954	5.29402	5.29592	5.21508	5.33303	5.31484	5.24512	5.22675	4.98681	5.10313	4.9468	4.99205	5.37099	5.34493	5.21681	5.02745	5.16625	5.52086	5.41367	5.18231	5.14496	5.04335	4.76329	4.80949	4.89004	5.15003	5.12735	5.04704	5.28624	5.33479	5.47844	5.36018	5.26145
2230.15	5.38534	5.26481	5.18512	5.12556	5.15066	4.96266	5.10679	4.99258	5.43676	5.30921	5.15068	5.30004	5.2141	5.21079	5.26145	4.90377	5.14808	4.91566	4.96998	5.28034	5.31677	5.17795	5.04774	5.2727	5.55313	5.41637	5.12224	5.13061	5.06514	4.74119	4.77322	4.87981	5.09533	5.29325	4.97708	5.30974	5.26016	5.391	5.40432	5.33234
2228.16	5.28067	5.22868	5.17775	5.26794	5.19192	5.02563	5.10919	4.95139	5.42985	5.27115	5.23051	5.24473	5.31574	5.18144	5.22246	4.89975	5.07991	4.88497	4.97384	5.21917	5.26329	5.15133	5.0104	5.24374	5.44205	5.34972	5.22348	5.07864	5.06112	4.72903	4.74796	4.88487	5.21554	5.3889	4.99629	5.33168	5.27121	5.35038	5.35911	5.28419
2226.18	5.27115	5.11942	5.25597	5.2967	5.1365	5.07085	5.12485	4.94717	5.29062	5.19462	5.26864	5.24243	5.26906	5.19303	5.12602	4.93847	5.03627	4.85813	4.98897	5.15595	5.44285	5.18272	5.0298	5.28517	5.41375	5.31526	5.28545	5.07043	5.08014	4.7246	4.74748	4.89191	5.10548	5.33331	4.98863	5.34632	5.26501	5.31514	5.25765	5.31746
2224.2	5.145	5.16822	5.20207	5.27248	5.20607	5.05591	5.02113	4.96735	5.32961	5.23028	5.30479	5.12261	5.20654	5.10831	5.11144	4.92987	4.99211	4.84935	4.99929	5.12538	5.43634	5.18055	5.02765	5.28684	5.331	5.31156	5.17959	5.03159	5.04899	4.72817	4.76617	4.89973	5.12938	5.27424	5.02762	5.32528	5.30842	5.2907	5.2243	5.30842
2222.22	5.23405	5.13183	5.23733	5.175	5.10704	5.01408	5.00017	4.97722	5.2316	5.23681	5.30981	5.07999	5.27771	5.13133	5.12244	4.90502	5.01387	4.84033	5.00513	5.29371	5.44703	5.21854	5.02502	5.38627	5.38371	5.28358	5.12561	5.06969	5.01621	4.74814	4.78911	4.91351	5.02671	5.30927	5.09345	5.44127	5.22717	5.2903	5.27714	5.21707
2220.25	5.21371	5.12739	5.27445	5.11286	5.05607	4.96337	5.00538	4.95215	5.19453	5.14576	5.12682	5.09329	5.24731	5.073	5.18802	4.9312	4.99363	4.83316	5.01366	5.18243	5.49771	5.22061	5.05589	5.28822	5.40493	5.26716	5.13152	5.02652	4.986	4.76837	4.80028	4.89419	5.04748	5.27143	5.06546	5.47066	5.2188	5.23599	5.20402	5.29206
2218.28	5.35529	5.19665	5.31086	5.25941	5.05154	4.9363	5.04409	4.94164	5.2485	5.22619	5.13252	5.10895	5.19489	5.13081	5.20631	4.94691	4.99207	4.8546	4.99822	5.17167	5.33494	5.18232	5.07515	5.28378	5.44777	5.29533	5.20462	5.05996	4.96109	4.77298	4.80813	4.88923	5.08323	5.17897	5.04737	5.37884	5.17503	5.29332	5.2055	5.19522
2216.31	5.27372	5.25193	5.28583	5.20321	5.01299	4.93398	5.00368	4.93715	5.30907	5.16172	5.25647	5.17757	5.20278	5.12736	5.26421	4.96909	5.01452	4.88862	5.02089	5.23149	5.32686	5.04129	5.09338	5.16934	5.4914	5.35637	5.18909	5.19165	4.92948	4.76907	4.80687	4.87375	5.12084	5.10474	5.01152	5.36714	5.21681	5.33013	5.25107	5.2292
2214.35	5.32423	5.26652	5.30295	5.1161	4.96839	4.9447	4.9998	4.97601	5.26426	5.23291	5.21823	5.15789	5.19346	5.05339	5.23803	5.0044	5.0515	4.92081	5.02174	5.28823	5.26219	5.04386	5.0057	5.13789	5.40532	5.29754	5.2808	5.14619	4.92076	4.7525	4.79733	4.87357	5.09293	5.11262	4.97863	5.38085	5.1734	5.28536	5.20539	5.20848
2212.39	5.31691	5.26529	5.21478	5.12949	4.97136	4.94222	5.0089	5.00273	5.23237	5.18683	5.1623	5.12561	5.26977	5.19045	5.21144	5.04101	5.05493	4.93247	4.99368	5.27177	5.29333	5.03438	4.96686	5.18997	5.35427	5.31537	5.24957	5.17262	4.89218	4.72855	4.78086	4.88345	5.12402	5.24018	4.97774	5.26558	5.19155	5.21556	5.23966	5.19397
2210.43	5.22398	5.34391	5.14779	5.15349	5.032	4.91581	4.96796	4.94751	5.13374	5.16807	5.16105	5.17754	5.11572	5.12068	5.20565	5.03058	5.05197	4.93901	4.98492	5.28592	5.222	5.01812	4.93137	5.22953	5.43311	5.24243	5.20408	5.12945	4.87276	4.71061	4.76887	4.8909	5.10845	5.22667	5.00926	5.2112	5.24282	5.24397	5.29299	5.30946
2208.48	5.32653	5.36051	5.15305	5.10364	5.0217	4.90327	5.00843	5.02245	5.13711	5.16359	5.13591	5.11917	5.12534	4.95806	5.1789	4.99797	5.00034	4.93455	4.91781	5.27567	5.37106	5.04902	4.92915	5.25809	5.38733	5.29446	5.16137	5.23455	4.87066	4.69886	4.76581	4.87294	5.04857	5.17682	5.04778	5.24052	5.25718	5.1999	5.26927	5.27004
2206.53	5.32481	5.33175	5.16363	5.27208	5.12859	4.90094	5.01991	4.98495	5.21646	5.14759	5.1763	5.07743	5.26552	5.09321	5.1676	4.92603	4.93397	4.90288	4.89314	5.25851	5.33332	5.1322	4.95082	5.26212	5.44244	5.39852	5.16541	5.14787	4.88333	4.69324	4.76467	4.84293	5.0098	5.09704	4.98873	5.30964	5.30772	5.20161	5.29883	5.23486
2204.59	5.16885	5.24761	5.23708	5.15543	5.14769	4.91553	5.06608	4.91755	5.15619	5.05735	5.08112	5.07009	5.22517	5.08547	5.08439	4.87678	4.89637	4.88134	4.92355	5.26263	5.41915	5.13136	5.00388	5.20671	5.39473	5.33077	5.07682	5.0984	4.892	4.68046	4.7595	4.81714	4.96871	5.13951	5.03611	5.32931	5.32828	5.13853	5.34614	5.2532
2202.64	5.16568	5.08109	5.15984	5.18878	5.2137	4.91206	5.0407	4.91722	5.2015	5.03478	5.17854	5.08671	5.17246	5.0435	5.08675	4.85065	4.88067	4.86079	4.94868	5.32527	5.35542	5.10052	4.9937	5.19395	5.47329	5.39089	5.02884	5.08184	4.90275	4.67563	4.75304	4.79984	4.95402	5.11661	5.01162	5.30063	5.27306	5.2138	5.25526	5.36614
2200.7	5.20774	5.11559	5.24587	5.11066	5.17808	4.91448	5.05394	4.97339	5.1765	5.07148	5.11545	5.11329	5.17164	5.05362	5.11073	4.85415	4.89131	4.84802	4.93712	5.31364	5.31942	5.05904	4.98278	5.31844	5.45784	5.31482	5.0421	5.07065	4.89649	4.67816	4.76373	4.80508	4.97985	5.11348	5.00969	5.29632	5.23897	5.12081	5.27116	5.46694
2198.77	5.12945	5.12839	5.1623	5.1982	5.14771	4.9109	5.0877	4.93566	5.12061	5.04239	5.08659	5.15104	5.20738	5.08861	5.16509	4.86275	4.92154	4.83848	4.88524	5.19769	5.30608	5.09032	4.9714	5.14377	5.28502	5.21775	5.10086	5.06633	4.90067	4.69105	4.76563	4.82079	4.99259	5.16595	5.00919	5.30439	5.30446	5.21079	5.2469	5.48078
2196.84	5.24348	5.09968	5.11842	5.23782	5.16272	4.92541	4.99861	4.93618	5.14085	5.06542	5.14714	5.14571	5.20702	5.1381	5.13086	4.88501	4.93212	4.8574	4.84324	5.13843	5.36023	5.06554	4.95579	5.12328	5.3462	5.24817	5.1469	5.06925	4.87818	4.70958	4.75668	4.82219	5.02688	5.2174	5.00364	5.26349	5.30173	5.37601	5.27619	5.37962
2194.91	5.23256	5.11811	5.31019	5.27664	5.14334	4.9634	4.95553	4.96127	5.16652	5.07491	5.08238	5.16015	5.22014	5.21057	5.13551	4.92183	4.92025	4.86415	4.81969	5.28509	5.30138	5.09413	4.96902	5.10277	5.28191	5.34106	5.21478	5.02821	4.87045	4.72708	4.73935	4.81805	5.07107	5.22112	5.01678	5.32175	5.23751	5.35747	5.33869	5.32394
2192.98	5.16143	5.16266	5.26708	5.31132	5.12853	5.01578	4.9827	4.98401	5.27453	5.14075	5.07637	5.18476	5.19808	5.26	5.14593	4.9776	4.93784	4.86841	4.81246	5.22029	5.24548	5.13841	4.97978	5.08518	5.31583	5.34542	5.14352	5.00628	4.87731	4.73238	4.71878	4.8184	5.09557	5.18111	5.00827	5.22545	5.22567	5.34798	5.40322	5.32521
2191.06	5.16806	5.13797	5.22685	5.22729	5.12324	4.94222	4.97006	4.9847	5.32133	5.17434	5.08303	5.14507	5.2437	5.24369	5.10281	4.92833	4.96277	4.86222	4.81543	5.20757	5.28322	5.18428	5.01936	5.06332	5.31162	5.36286	5.16305	5.06046	4.89112	4.72915	4.71974	4.81672	5.13835	5.11412	4.98684	5.34585	5.17847	5.26112	5.36139	5.25779
2189.14	5.23487	5.16108	5.1249	5.1793	5.09401	4.91976	5.00407	4.96895	5.23907	5.1817	5.06927	5.10907	5.28688	5.22302	5.08666	4.93292	4.9996	4.86444	4.82608	5.1601	5.29661	5.14281	5.04604	5.06844	5.37732	5.38151	5.16232	5.12251	4.938	4.72331	4.72376	4.82898	5.14252	5.10388	4.95278	5.35165	5.12285	5.19543	5.28038	5.26465
2187.23	5.2441	5.15081	5.18441	5.09586	5.0917	4.94003	4.9965	4.96909	5.22415	5.14656	5.0764	5.10246	5.20315	5.23743	5.12054	4.99539	4.93318	4.88315	4.84469	5.24134	5.44871	5.14872	5.0702	5.11803	5.44118	5.43155	5.19474	5.15168	4.96457	4.72457	4.72939	4.84595	5.14815	5.18652	4.93281	5.43203	5.06255	5.17526	5.23252	5.33754
2185.31	5.30354	5.23372	5.12789	5.11218	5.1147	4.92574	5.02327	4.98023	5.22021	5.14844	5.0994	5.06435	5.15853	5.24977	5.14412	5.01887	4.8968	4.90874	4.84337	5.32678	5.39695	5.14872	5.0765	5.06786	5.48168	5.44272	5.18455	5.13732	4.97468	4.731	4.72254	4.87564	5.0141	5.28552	4.9436	5.24581	5.06772	5.18736	5.20027	5.1395
2183.41	5.31237	5.2563	5.24196	5.08448	5.13799	4.95855	5.05545	4.99138	5.27528	5.22562	5.09716	5.09573	5.15895	5.23139	5.18911	5.00695	4.90696	4.90726	4.83004	5.3881	5.35591	5.12269	5.10618	5.08155	5.54076	5.34641	5.22712	5.05142	4.96429	4.73544	4.73286	4.92095	5.06369	5.27494	4.96218	5.10351	5.10045	5.1242	5.19621	5.12899
2181.5	5.23187	5.22033	5.17929	5.11045	5.15373	5.00584	5.0049	5.00507	5.29674	5.21514	5.08057	5.04495	5.24833	5.19375	5.18065	4.99547	4.8733	4.87365	4.80536	5.43161	5.32653	5.054	5.0783	5.10625	5.47133	5.35085	5.24449	5.05499	4.96071	4.71816	4.73855	4.94056	5.11726	5.22285	4.98175	5.06603	5.15356	5.20828	5.20266	5.12331
2179.6	5.20485	5.1521	5.11838	5.1074	5.12787	5.0392	4.95982	4.99038	5.22096	5.17946	5.18439	5.12125	5.19639	5.1504	5.21351	4.97137	4.87663	4.84931	4.78016	5.39832	5.22938	5.01367	5.06938	5.1328	5.36702	5.32082	5.15318	5.0485	4.96546	4.69738	4.76374	4.89481	5.13279	5.1902	4.97151	5.22992	5.0955	5.25768	5.19438	5.12601
2177.7	5.19933	5.17258	5.09359	5.15522	5.07507	5.01913	4.9206	5.02174	5.27504	5.19117	5.15521	5.21489	5.15406	5.14239	5.14345	4.8981	4.91046	4.86382	4.77239	5.37996	5.26407	5.04035	5.04054	5.21387	5.2286	5.46074	5.12965	5.11316	4.9641	4.6773	4.7882	4.88036	5.17151	5.1845	4.9645	5.256	5.0409	5.22241	5.23827	5.22224
2175.81	5.24824	5.08951	5.11957	5.10717	5.01788	4.96653	4.88848	4.95061	5.26156	5.19951	5.11698	5.27495	5.14479	5.15568	5.09313	4.9096	4.95954	4.89355	4.77997	5.3471	5.23126	5.07231	4.99653	5.1398	5.36572	5.50123	5.16526	5.13819	4.95962	4.66943	4.79862	4.90076	5.14513	5.17196	4.97634	5.19076	5.00093	5.18747	5.29594	5.25949
2173.91	5.09421	5.09036	5.14859	5.08662	4.98056	4.91675	4.88227	4.96091	5.29156	5.17627	5.0741	5.28075	5.0897	5.1408	5.1387	4.99998	4.98611	4.92659	4.79472	5.31202	5.22925	5.10318	4.96678	5.19509	5.40072	5.43311	5.13039	5.26768	4.96125	4.68035	4.77565	4.91117	5.18302	5.20452	4.96204	5.28974	5.03527	5.26031	5.38504	5.36319
2172.02	5.16507	5.10489	5.11491	5.13299	4.98833	4.89035	4.89563	4.95888	5.25281	5.06477	5.0455	5.25133	5.11851	5.06899	5.09824	4.95298	4.95811	4.93826	4.80743	5.30785	5.23717	5.06446	4.95479	5.17987	5.33478	5.29763	5.1523	5.22748	4.90237	4.69078	4.73927	4.90951	5.22254	5.27677	5.01281	5.36684	5.04786	5.38616	5.41089	5.2477
2170.14	5.23094	5.18064	5.2209	5.1675	5.01951	4.88304	4.90609	5.01162	5.21766	5.04696	5.06163	5.17944	5.14555	5.0173	5.12023	4.93236	4.91425	4.92737	4.81665	5.35098	5.22104	5.05457	4.98103	5.12505	5.46002	5.22525	5.12619	5.19291	4.85859	4.70608	4.71518	4.91796	5.26185	5.17599	5.17007	5.29547	5.08097	5.28771	5.31665	5.28469
2168.26	5.24942	5.18151	5.25567	5.24168	5.03262	4.89178	4.91713	5.01051	5.21441	5.06205	5.10795	5.13992	5.10589	5.00683	5.15103	4.92322	4.89215	4.88812	4.81437	5.32401	5.21019	5.09502	5.01497	5.10046	5.40006	5.24611	5.07458	5.16428	4.8399	4.72189	4.70337	4.92495	5.137	5.22828	5.15935	5.30605	5.20065	5.30444	5.3011	5.30941
2166.38	5.29291	5.1176	5.24012	5.30626	5.03054	4.88886	4.94959	4.98825	5.18263	5.07451	5.13717	5.10517	5.11768	4.9943	5.21505	4.90138	4.8814	4.87048	4.81217	5.28759	5.20009	5.06374	5.00616	5.11874	5.36298	5.26291	5.06682	5.12688	4.84054	4.72802	4.69718	4.93559	5.05672	5.13984	5.13106	5.23938	5.17723	5.3494	5.23968	5.3842
2164.5	5.29703	5.11991	5.22442	5.3466	5.04456	4.89064	4.91894	4.98571	5.19616	5.09437	5.09384	5.07507	5.18845	5.03116	5.23392	4.87934	4.88622	4.87269	4.81211	5.30303	5.31154	5.06503	5.02	5.15444	5.34549	5.31934	5.09219	5.09339	4.85667	4.72752	4.69644	4.94748	5.11526	5.08476	5.11257	5.28349	5.13215	5.37123	5.24309	5.34818
2162.63	5.29478	5.13938	5.29484	5.3146	5.06064	4.9076	4.95929	5.00361	5.25178	5.11634	5.07846	5.06381	5.1572	5.08652	5.22462	4.8504	4.9025	4.87001	4.82032	5.23323	5.30824	5.05052	5.0771	5.20133	5.39617	5.32076	5.04231	5.12534	4.89447	4.71849	4.69993	4.96772	5.07325	5.07129	5.0141	5.30025	5.14124	5.24327	5.308	5.29267
2160.76	5.24693	5.1399	5.30528	5.30388	5.07523	4.93711	5.0302	4.94359	5.29453	5.11432	5.07406	5.07113	5.16326	5.08013	5.34263	4.84829	4.92788	4.86644	4.84599	5.22462	5.39734	5.0633	5.11662	5.20334	5.47367	5.36657	5.12321	5.19643	4.96016	4.69839	4.71615	4.94682	5.05668	5.07656	4.99804	5.3655	5.20095	5.25894	5.30987	5.33376
2158.89	5.28173	5.07824	5.38393	5.31056	5.04541	4.96632	5.00921	4.94531	5.28913	5.0991	5.05658	5.09244	5.19594	5.08491	5.32355	4.86932	4.93428	4.86558	4.86556	5.21955	5.39734	5.09157	5.06992	5.16841	5.40343	5.39139	5.09241	5.16747	5.02406	4.68421	4.74484	4.93826	5.12642	5.16466	5.01173	5.26206	5.17157	5.17085	5.25741	5.40216
2157.03	5.17706	5.06776	5.46591	5.23872	4.9922	4.95099	4.98181	4.99012	5.3369	5.08848	5.04062	5.13933	5.20517	5.09288	5.32344	4.88311	4.95867	4.87473	4.86331	5.17129	5.27337	5.10225	5.07387	5.17001	5.34881	5.43596	5.04981	5.12947	5.00827	4.67397	4.77571	4.93354	5.11238	5.19601	4.97105	5.25151	5.12379	5.19356	5.24699	5.34055
2155.17	5.10302	5.07867	5.40877	5.24847	4.93463	4.91773	4.95987	4.94352	5.31231	5.03951	5.01422	5.16437	5.23323	5.16615	5.25828	4.88209	4.9756	4.8613	4.8653	5.19367	5.2064	5.07335	5.01387	5.1652	5.31075	5.41417	5.01312	5.11057	4.98537	4.67818	4.77218	4.93936	5.1599	5.19978	4.93462	5.17593	5.07085	5.23736	5.1924	5.21165
2153.32	5.13498	5.09866	5.31126	5.21808	4.90183	4.89232	4.95288	4.92371	5.27589	5.06223	4.99901	5.17	5.20514	5.11254	5.24884	4.88449	4.99153	4.84985	4.86178	5.25963	5.2982	5.0403	4.98805	5.14618	5.21879	5.38507	4.98878	5.11346	4.96076	4.68929	4.75441	4.94019	5.13092	5.09752	4.92979	5.24814	5.03276	5.32328	5.26112	5.18891
2151.46	5.32589	5.13228	5.18434	5.23918	4.88694	4.88008	4.96478	4.9262	5.20701	5.07895	4.99811	5.19537	5.18056	5.12097	5.25454	4.8935	4.98442	4.8246	4.86728	5.32423	5.25528	5.00702	4.98203	5.20463	5.23272	5.28522	4.98314	5.15181	4.94867	4.70401	4.73456	4.9465	5.06119	5.06956	4.94327	5.22271	5.01009	5.40046	5.27682	5.19931
2149.61	5.2375	5.14847	5.18927	5.17543	4.90236	4.87784	4.97807	4.94395	5.33321	5.17644	5.03487	5.23282	5.16197	5.1497	5.105	4.9168	4.95974	4.81718	4.89251	5.28391	5.18303	4.99284	5.0124	5.15116	5.25519	5.25802	5.03754	5.16927	4.9577	4.7151	4.72756	4.9791	5.0661	5.07077	4.98513	5.21718	5.0194	5.41848	5.47636	5.31691
2147.77	5.27997	5.12979	5.14913	5.19719	4.96528	4.89789	4.98674	4.98064	5.24337	5.16141	5.11529	5.27759	5.1592	5.11765	5.07634	4.95704	4.95318	4.82926	4.91708	5.22345	5.34567	4.99769	5.00951	5.16235	5.32231	5.2849	5.03192	5.14584	4.99537	4.7149	4.73227	4.9807	5.10776	5.09563	5.0355	5.22962	5.05297	5.41563	5.49244	5.30254
2145.92	5.24303	5.1203	5.16914	5.09511	4.96506	4.90552	4.9688	5.02122	5.28752	5.10562	5.14072	5.15311	5.20121	5.10612	5.10782	4.97604	4.99365	4.8396	4.92013	5.23193	5.28452	5.02032	5.00879	5.20244	5.33132	5.27694	5.00495	5.12308	5.03671	4.71429	4.74378	4.93939	5.10208	5.09972	5.06409	5.29564	5.1293	5.46359	5.47624	5.27481
2144.08	5.28346	5.14068	5.21907	5.21835	5.03267	4.90767	4.93423	5.06366	5.28047	5.14585	5.2159	5.06874	5.1569	5.09951	5.15483	4.95451	4.92703	4.84154	4.90468	5.14868	5.26514	5.0621	5.00584	5.21136	5.47442	5.29628	5.06226	5.10929	5.01929	4.71727	4.74465	4.89403	5.11798	5.1376	5.11665	5.26889	5.13926	5.44178	5.40957	5.27259
2142.25	5.36357	5.08958	5.22882	5.26245	4.97688	4.89627	4.91023	4.96758	5.27217	5.10766	5.2145	5.06967	5.15851	5.1249	5.11129	4.92402	4.92753	4.82966	4.87512	5.22203	5.32304	5.13582	5.02518	5.23077	5.4461	5.27329	5.0651	5.13514	5.00228	4.73203	4.7351	4.86813	5.23765	5.16338	5.09879	5.19197	5.19337	5.35803	5.35545	5.2647
2140.41	5.228	5.09167	5.22207	5.14554	4.94991	4.88929	4.88941	4.94387	5.27757	5.10185	5.23705	5.04228	5.15923	5.15882	5.11229	4.91372	4.97315	4.82372	4.84935	5.28882	5.25785	5.12905	5.07268	5.18593	5.44894	5.31284	5.12723	5.17852	4.99314	4.74711	4.71283	4.85996	5.26057	5.14341	5.04315	5.15976	5.21036	5.30422	5.30696	5.30745
2138.58	5.11656	5.15234	5.23129	5.13149	4.94626	4.87722	4.86466	4.98693	5.33777	5.11493	5.18354	5.06931	5.16183	5.23723	5.14399	4.90501	4.90507	4.83111	4.82537	5.38002	5.20025	5.19273	4.99411	5.24902	5.31486	5.39931	5.07101	5.09787	5.00406	4.74742	4.69193	4.85507	5.19291	5.12528	5.02266	5.19041	5.13352	5.39892	5.26555	5.30864
2136.75	5.32026	5.07189	5.21706	5.14312	4.96379	4.88009	4.86453	4.98094	5.3398	5.13509	5.16997	5.12811	5.22769	5.21027	5.20824	4.9081	4.87436	4.84494	4.8043	5.3774	5.24697	5.27877	4.98005	5.24993	5.29164	5.36737	5.11061	5.0845	5.01183	4.74438	4.68313	4.8496	5.18844	5.13271	5.01366	5.23567	5.10512	5.30837	5.24079	5.30155
2134.93	5.20749	5.09332	5.25519	5.19595	4.975	4.90686	4.87514	4.95355	5.38826	5.13932	5.22092	5.08474	5.2473	5.22302	5.24426	4.91557	4.86531	4.83974	4.79305	5.42548	5.19357	5.22128	5.07917	5.26917	5.26028	5.39924	5.0634	5.12171	5.01997	4.73861	4.68086	4.835	5.1547	5.16213	5.01794	5.32549	5.12332	5.24174	5.27367	5.23912
2133.11	5.21772	5.15835	5.21668	5.19084	4.99149	4.93415	4.90057	4.91995	5.45671	5.13526	5.18011	5.14788	5.25968	5.18961	5.23968	4.91922	4.87694	4.84346	4.79805	5.42593	5.13876	5.14684	4.99812	5.18255	5.16111	5.35163	5.06849	5.1393	5.00176	4.73846	4.68595	4.83338	5.10388	5.25013	5.03587	5.33487	5.08805	5.28748	5.31911	5.22056
2131.29	5.2683	5.14466	5.24601	5.22762	5.01511	4.96894	4.91882	4.88402	5.29009	5.16543	5.15159	5.22438	5.32193	5.1491	5.16551	4.93727	4.89422	4.87315	4.81026	5.35937	5.14047	5.12786	4.98168	5.13136	5.27402	5.35035	5.07941	5.08656	4.95947	4.73137	4.67968	4.83696	5.07138	5.31495	5.06555	5.27008	5.0842	5.29805	5.34685	5.16719
2129.47	5.38314	5.13189	5.28083	5.30511	5.02907	4.92076	4.93616	4.88746	5.21669	5.16232	5.17603	5.2219	5.20568	5.14318	5.23268	4.86368	4.90514	4.88083	4.8251	5.36618	5.18707	5.06171	4.98887	5.15502	5.21199	5.29198	5.02701	5.08548	4.92012	4.70937	4.6722	4.84851	5.07262	5.23593	5.04635	5.28169	5.13919	5.26626	5.35599	5.20001
2127.66	5.3338	5.12333	5.34485	5.31007	5.0089	4.87346	4.95723	4.93007	5.19789	5.19842	5.17814	5.25671	5.19045	5.1059	5.24529	4.86829	4.90479	4.87189	4.83136	5.24562	5.2089	5.01933	5.03208	5.18444	5.27654	5.24699	5.01101	5.11813	4.88766	4.68119	4.66225	4.85376	5.0945	5.1801	5.05163	5.16804	5.17063	5.26281	5.34685	5.27239
2125.85	5.38601	5.14572	5.40801	5.30531	4.99835	4.84039	4.98281	4.96634	5.13617	5.22287	5.20892	5.24366	5.2232	5.1029	5.14638	4.89086	4.9043	4.8654	4.83249	5.25102	5.15786	5.00192	5.12073	5.15987	5.33341	5.24344	5.02583	5.15233	4.86705	4.66566	4.66351	4.85946	5.15857	5.10888	4.95779	5.27661	5.19999	5.34899	5.35938	5.19833
2124.04	5.34428	5.13177	5.47067	5.29436	4.99629	4.82438	4.96137	4.96429	5.23863	5.38985	5.22642	5.23338	5.35577	5.12622	5.11839	4.98679	4.91904	4.85382	4.83018	5.26632	5.22496	5.0188	5.08503	5.17681	5.39646	5.36555	5.06032	5.18458	4.87744	4.67381	4.67365	4.87125	5.10413	5.15216	5.01988	5.31912	5.19909	5.36468	5.33481	5.25663
2122.24	5.31424	5.20926	5.35251	5.17254	5.01034	4.82797	4.93613	4.93047	5.25573	5.27832	5.22419	5.21555	5.23725	5.11399	5.11099	4.97837	4.95563	4.84544	4.83221	5.36537	5.33591	5.0726	5.07631	5.20925	5.36941	5.32634	5.01906	5.19617	4.93983	4.69058	4.68337	4.90491	5.08271	5.13961	4.96946	5.30576	5.24813	5.43663	5.24451	5.22904
2120.44	5.3333	5.2372	5.34414	5.15592	5.05558	4.85052	4.93275	4.89654	5.30312	5.34882	5.17783	5.24115	5.2576	5.18967	5.1562	4.95628	5.01442	4.83509	4.84135	5.2158	5.33228	5.02128	5.0863	5.20796	5.41654	5.28527	5.02924	5.17536	5.01549	4.69796	4.69377	4.8722	5.10161	5.15315	4.95833	5.29636	5.20384	5.42178	5.22944	5.31443
2118.64	5.29955	5.22834	5.23658	5.0781	5.0966	4.8671	4.96283	4.87977	5.19638	5.37583	5.29884	5.18698	5.1722	5.39765	5.12715	4.94506	5.08344	4.82303	4.83847	5.32641	5.34624	5.0314	5.03675	5.16099	5.34317	5.33132	5.06554	5.13469	5.0444	4.69346	4.69756	4.9723	5.11063	5.16855	4.95122	5.29661	5.18014	5.41771	5.26918	5.18213
2116.85	5.25015	5.14737	5.27391	5.07383	5.10454	4.88761	5.02883	4.89597	5.14295	5.30507	5.24399	5.16457	5.1274	5.26028	5.06505	4.94854	5.06536	4.82921	4.82827	5.28559	5.20135	5.04316	5.07506	5.07702	5.35536	5.32328	5.0303	5.11651	5.03233	4.69295	4.69558	4.94286	5.09898	5.19451	4.97654	5.39884	5.25276	5.3682	5.29802	5.25071
2115.06	5.21135	5.18354	5.18438	5.09172	5.09602	4.89697	5.10412	4.93418	5.12597	5.29392	5.23936	5.12334	5.23609	5.19016	5.0471	4.95635	5.06245	4.85648	4.82722	5.27255	5.25574	5.14724	5.07312	5.16454	5.26308	5.43335	5.03504	5.09972	5.00074	4.69099	4.68945	4.91882	5.16822	5.17754	5.00575	5.36723	5.28849	5.22516	5.3106	5.42335
2113.27	5.21926	5.24612	5.16278	5.13181	5.09496	4.90122	5.08091	4.96349	5.18846	5.25283	5.18748	5.1133	5.25547	5.1347	5.03088	4.95009	5.06696	4.88085	4.83025	5.2496	5.20772	5.08914	5.07437	5.22927	5.29342	5.44909	5.07205	5.12435	4.97971	4.68152	4.68764	4.90987	5.19646	5.16979	5.04396	5.37996	5.26107	5.37353	5.16855	5.32264
2111.49	5.2844	5.23216	5.12232	5.13936	5.09047	4.90663	5.05507	4.98146	5.14598	5.2303	5.17284	5.12711	5.3104	5.13982	5.08303	4.92791	5.05032	4.90221	4.8435	5.30341	5.25963	5.05013	5.08965	5.21611	5.29358	5.46222	5.10655	5.1981	4.95751	4.66518	4.68958	4.89329	5.24681	5.1656	5.07659	5.29309	5.23185	5.27914	5.17516	5.30831
2109.7	5.30752	5.24005	5.16525	5.16461	5.09129	4.9297	5.00652	4.9847	5.24395	5.23983	5.12285	5.13175	5.32066	5.17744	5.23696	4.91043	5.02872	4.8998	4.87244	5.27562	5.39315	5.04319	5.09412	5.25011	5.3145	5.35058	5.0907	5.24679	4.94595	4.65795	4.69804	4.89475	5.24479	5.16745	5.08032	5.287	5.25126	5.42846	5.29374	5.17353
2107.93	5.32664	5.16505	5.15344	5.06675	5.11423	4.95744	4.98969	4.96968	5.24204	5.11206	5.1899	5.15299	5.28023	5.18551	5.28762	4.90844	5.01178	4.91076	4.88208	5.31463	5.34932	5.05789	5.00696	5.19831	5.30879	5.34285	5.13057	5.24135	4.94058	4.66127	4.70828	4.8963	5.20575	5.13157	5.06113	5.23511	5.30273	5.40279	5.24159	5.22257
2106.15	5.38626	5.07263	5.18049	5.07412	5.12841	4.98651	4.97551	4.96427	5.20572	5.2089	5.20313	5.1526	5.22852	5.23358	5.32125	4.92469	5.0032	4.91333	4.87846	5.47983	5.31852	5.06259	4.98833	5.25125	5.3667	5.22971	5.18552	5.14649	4.95319	4.67157	4.72161	4.91163	5.16136	5.11758	5.03047	5.24036	5.17361	5.31832	5.27481	5.22405
2104.38	5.47505	5.00173	5.13861	5.08287	5.109	5.00405	4.98526	4.97329	5.2024	5.15671	5.2783	5.10352	5.18949	5.22744	5.26324	4.93582	5.00504	4.91979	4.84336	5.35712	5.25609	5.02374	4.97694	5.25391	5.37123	5.32021	5.17672	5.18245	4.97804	4.67933	4.73371	4.91159	5.2557	5.13556	4.98851	5.15095	5.16335	5.21348	5.34066	5.23366
2102.61	5.46376	4.9556	5.1926	5.10363	5.09054	5.00493	4.99725	4.94534	5.23267	5.22921	5.27685	5.0945	5.19449	5.19469	5.20598	4.94284	5.00197	4.90115	4.81995	5.32798	5.29608	4.99806	4.97939	5.23074	5.36388	5.22875	5.1717	5.07701	5.0244	4.68141	4.72842	4.88176	5.22086	5.16821	4.96396	5.20888	5.17045	5.22118	5.35681	5.27823
2100.84	5.50533	4.93892	5.18996	5.24039	5.03009	4.99446	5.01985	4.92056	5.27495	5.19676	5.30138	5.08848	5.22404	5.13019	5.16618	4.94238	4.98503	4.86106	4.81275	5.33745	5.23987	5.01283	4.9837	5.22331	5.30272	5.34141	5.16996	5.19743	4.96548	4.67928	4.71439	4.86142	5.22927	5.1735	4.96667	5.22019	5.23203	5.32328	5.38211	5.41075
2099.08	5.43615	4.9392	5.17309	5.34158	5.00863	4.9785	5.01142	4.89797	5.24617	5.15189	5.19625	5.12954	5.21894	5.09373	5.13336	4.92296	4.97864	4.83163	4.81425	5.45315	5.19801	5.07638	4.98438	5.19801	5.29543	5.28751	5.12878	5.12234	4.96875	4.66947	4.7015	4.86386	5.22684	5.1831	4.97167	5.23161	5.30335	5.39317	5.41128	5.22095
2097.32	5.34292	4.96594	5.19242	5.33311	5.01147	4.95388	4.96542	4.89477	5.28082	5.14048	5.19577	5.20705	5.23077	5.11811	5.14765	4.90556	4.95911	4.81099	4.8179	5.32834	5.19809	5.03644	4.99123	5.21901	5.21228	5.27697	5.10586	5.13192	5.00777	4.6779	4.71	4.89256	5.22412	5.21096	4.98779	5.24971	5.23305	5.35022	5.31168	5.35905
2095.56	5.26256	5.01013	5.20795	5.30143	5.04299	4.93541	4.92062	4.88249	5.38785	5.16356	5.15242	5.17765	5.22349	5.07929	5.07778	4.90432	4.95447	4.80097	4.81558	5.35586	5.20692	5.11351	4.98892	5.14703	5.2211	5.33819	5.1158	5.13813	4.98773	4.68871	4.73292	4.9415	5.18211	5.23968	5.0125	5.23265	5.2399	5.35038	5.3388	5.41396
2093.8	5.24012	5.02763	5.2006	5.30666	5.09197	4.91098	4.88484	4.87626	5.35287	5.18369	5.17319	5.13226	5.20971	5.16266	5.07285	4.92746	4.95942	4.79245	4.79657	5.33792	5.22421	5.10915	4.98387	5.1363	5.24535	5.41663	5.11286	5.10999	4.9882	4.69878	4.75743	4.95639	5.17031	5.24443	5.03507	5.23687	5.28887	5.34256	5.30165	5.32618
2092.05	5.22292	5.02399	5.21514	5.22568	5.02947	4.89877	4.87435	4.8759	5.27486	5.15651	5.07569	5.10364	5.30959	5.12436	5.06513	4.95958	4.97467	4.78584	4.79299	5.23473	5.16008	5.0933	4.99519	5.2114	5.32383	5.34644	5.1199	5.0823	5.01166	4.70281	4.74754	4.94238	5.07647	5.2563	5.06199	5.22164	5.24931	5.33013	5.35916	5.29614
2090.3	5.23689	5.02127	5.17924	5.20899	5.10575	4.89345	4.88965	4.89327	5.25044	5.14431	5.0273	5.18933	5.30385	5.14973	5.05025	4.97067	4.96579	4.78629	4.81083	5.26856	5.16122	5.07095	4.9942	5.11249	5.25434	5.27907	5.15572	5.01412	5.03291	4.70242	4.72824	4.90703	5.0772	5.20263	5.0652	5.19324	5.19818	5.32566	5.34519	5.36674
2088.55	5.26077	5.05156	5.14274	5.09675	5.06804	4.90137	4.90316	4.92184	5.26504	5.13121	5.0088	5.17331	5.32883	5.1862	5.0427	4.95054	4.93944	4.79356	4.80955	5.28353	5.25775	5.04436	5.00759	5.17101	5.16383	5.35469	5.19242	5.12483	5.08405	4.70605	4.70296	4.88119	5.12791	5.14465	5.06914	5.22628	5.25613	5.42756	5.34912	5.3358
2086.81	5.32862	5.07969	5.10767	5.10341	5.00833	4.91299	4.89915	4.96499	5.24364	5.1513	5.02924	5.14105	5.24438	5.22509	5.05318	4.93414	4.89352	4.80117	4.80035	5.26578	5.2064	5.03603	4.9821	5.16465	5.23491	5.38269	5.19194	5.11595	5.02335	4.7085	4.68878	4.87089	5.09809	5.21076	5.04832	5.26256	5.2437	5.528	5.34218	5.34738
2085.07	5.25062	5.12779	5.07876	5.08933	5.01062	4.90153	4.88067	4.99743	5.28025	5.13716	5.09117	5.1718	5.34369	5.21559	5.06247	4.90805	4.85205	4.80533	4.77906	5.35173	5.25582	5.05207	4.99622	5.08295	5.32516	5.42242	5.17455	5.19512	5.01408	4.70619	4.69546	4.88332	5.06468	5.18623	5.02149	5.22948	5.23838	5.34043	5.41674	5.35506
2083.33	5.26721	5.1607	5.05839	5.10565	5.0854	4.87062	4.87563	4.98146	5.24609	5.09365	5.17085	5.15271	5.23038	5.13567	5.06846	4.90116	4.8297	4.80245	4.76545	5.35784	5.3551	5.06543	5.00079	5.12667	5.23073	5.45586	5.16145	5.13423	4.99345	4.70974	4.70855	4.89295	5.06914	5.17423	4.9998	5.20219	5.1793	5.35313	5.40319	5.29397
2081.6	5.3334	5.21304	5.07182	5.17313	5.04776	4.84783	4.90018	4.95383	5.20965	5.09532	5.2143	5.16278	5.22088	5.10242	5.08364	4.91395	4.81677	4.78902	4.76022	5.4155	5.37311	5.05399	5.10221	5.0818	5.23232	5.40568	5.19789	5.10253	5.0014	4.70284	4.71115	4.89315	5.06134	5.18584	4.99564	5.1695	5.23089	5.25603	5.44962	5.40699
2079.87	5.26952	5.23112	5.08543	5.17852	5.00726	4.82949	4.94158	4.91941	5.23276	5.18611	5.20746	5.16362	5.21742	5.08247	5.09241	4.91734	4.82811	4.77205	4.75658	5.28878	5.3509	5.02839	5.04105	5.09386	5.32037	5.48168	5.09837	5.06143	4.92951	4.69538	4.70366	4.89125	5.06715	5.15399	4.96944	5.18331	5.19572	5.26412	5.38547	5.42972
2078.14	5.27519	5.19142	5.11946	5.0949	5.00024	4.84097	4.95058	4.90854	5.30075	5.08434	5.14267	5.09823	5.19126	5.12065	5.15351	4.92236	4.85303	4.7561	4.76383	5.35203	5.34383	4.99742	5.01484	5.10895	5.3161	5.65201	5.1017	5.03014	4.89624	4.6897	4.69469	4.88826	5.06996	5.13845	4.94489	5.15595	5.14259	5.2708	5.4006	5.43556
2076.41	5.26807	5.15087	5.19678	5.06331	4.99959	4.88696	4.94876	4.93107	5.28913	5.14299	5.12129	5.04341	5.09905	5.11165	5.16	4.9062	4.88373	4.75441	4.77691	5.34035	5.23759	4.99508	4.98397	5.12515	5.38206	5.57067	5.05569	5.02827	4.89208	4.68564	4.69083	4.88398	5.14331	5.05988	4.92661	5.1641	5.1098	5.21673	5.36064	5.41692
2074.69	5.38193	5.11775	5.28278	5.0404	5.00935	4.93182	4.97975	4.93367	5.31732	5.07416	5.09099	5.11835	5.0948	5.14145	5.10512	4.8844	4.93084	4.77566	4.78138	5.35468	5.26583	5.01142	5.00191	5.15857	5.29838	5.31149	5.07243	5.03941	4.91139	4.68548	4.68359	4.88372	5.27821	5.04073	4.94589	5.18996	5.10103	5.23581	5.35544	5.43564
2072.97	5.26722	5.11146	5.35799	5.0322	5.02806	4.94674	4.92473	4.92762	5.24359	5.08862	5.07072	5.14182	5.1136	5.19535	5.0839	4.8619	4.96233	4.79696	4.79077	5.33208	5.2743	5.01943	5.01577	5.18389	5.24753	5.41215	5.07789	5.07912	4.93447	4.67618	4.67876	4.86862	5.25447	5.04944	4.9944	5.20413	5.14677	5.21292	5.36832	5.35253
2071.25	5.18413	5.14494	5.36206	5.0459	5.05235	4.9025	5.03988	4.91196	5.18476	5.08879	5.06908	5.09582	5.07595	5.09688	5.23453	4.85798	4.9141	4.81661	4.78541	5.4246	5.16843	5.00967	5.01521	5.21505	5.17588	5.48246	5.08432	5.12455	4.95021	4.67402	4.67879	4.86747	5.17487	5.14913	5.02329	5.14741	5.15702	5.23427	5.34642	5.30665
2069.54	5.21436	5.10006	5.29808	5.0821	5.05304	4.85096	4.9955	4.92212	5.15338	5.12577	5.06561	5.06981	5.06692	5.02116	5.19706	4.8563	4.89143	4.81249	4.78429	5.40568	5.25505	4.97212	5.00074	5.19612	5.20636	5.44792	5.09143	5.11799	4.9579	4.67698	4.68402	4.86036	5.1748	5.1497	5.00987	5.10944	5.14184	5.2989	5.3221	5.3073
2067.82	5.22962	5.07733	5.311	5.06152	5.03435	4.82775	5.00347	4.87411	5.13776	5.14861	5.05992	5.06365	5.10434	4.98789	5.13477	4.87118	4.84961	4.79297	4.76839	5.39391	5.21731	4.93237	4.99376	5.1241	5.19234	5.42239	5.07007	5.04129	4.96405	4.68541	4.68019	4.86513	5.14373	5.20865	5.00459	5.08712	5.13362	5.25772	5.27762	5.44958
2066.12	5.25466	5.10868	5.35521	5.13226	5.00791	4.8206	5.03406	4.89094	5.13993	5.12423	5.04298	5.07248	5.07555	4.9835	5.22267	4.85169	4.86997	4.7716	4.75502	5.43002	5.26115	4.90901	4.98237	5.1126	5.18802	5.39965	5.05242	5.11678	4.95753	4.68544	4.66411	4.90098	5.11393	5.19317	4.96956	5.07777	5.12305	5.21401	5.21778	5.32355
2064.41	5.18655	5.19054	5.34386	5.19675	4.98525	4.82581	5.00349	4.9589	5.13897	5.06114	5.06154	5.01159	5.06756	5.03495	5.2431	4.81563	4.82279	4.75653	4.75002	5.43108	5.22447	4.9005	4.97218	5.07101	5.22331	5.43484	5.0325	5.18381	4.93009	4.67226	4.63738	4.93793	5.17117	5.22023	4.95465	5.11054	5.08271	5.20823	5.19521	5.28589
2062.71	5.14594	5.1883	5.37978	5.12148	4.99869	4.82446	4.99915	4.93153	5.16469	5.00712	5.06341	4.9733	5.05	5.07326	5.19614	4.79781	4.81753	4.75643	4.73973	5.36316	5.24909	4.92465	4.98011	5.02354	5.197	5.38349	5.01982	5.15594	4.87859	4.66191	4.61917	4.92738	5.20484	5.2296	4.99472	5.13293	5.02811	5.2065	5.19855	5.30447
2061.01	5.14229	5.1423	5.38084	5.07575	5.02232	4.82414	5.00239	4.92956	5.14515	5.0015	5.10858	4.94195	5.05647	5.05578	5.14534	4.80481	4.82794	4.76422	4.73862	5.36864	5.20427	4.98291	4.96945	4.99624	5.17504	5.45402	5.01087	5.07811	4.85095	4.65398	4.6146	4.87946	5.17594	5.18546	4.93068	5.1161	5.01637	5.20564	5.18265	5.219
2059.31	5.15456	5.0947	5.29025	5.08444	5.02193	4.82538	5.00221	4.92563	5.13023	5.05452	5.06345	4.92593	5.00605	5.04338	5.12542	4.81074	4.8455	4.78578	4.73308	5.31106	5.16543	5.00905	4.9688	5.06226	5.14932	5.24745	5.00174	5.10315	4.84827	4.65204	4.6147	4.83455	5.15592	5.13597	5.02872	5.08447	5.01096	5.17968	5.22703	5.18907
2057.61	5.18392	5.06184	5.26745	5.03555	5.00799	4.84981	4.99347	4.92748	5.10073	5.09872	5.03175	4.92558	5.0273	5.10358	5.10708	4.80578	4.85927	4.79836	4.72838	5.26683	5.18494	4.99867	4.97337	5.02412	5.16718	5.20667	4.98552	5.18902	4.85988	4.64523	4.61209	4.79545	5.11538	5.1209	5.02376	5.05846	5.03034	5.1645	5.18942	5.14202
2055.92	5.26152	5.0331	5.28091	5.02793	4.9854	4.88465	4.95173	4.92559	5.07732	5.12951	5.03595	4.98382	5.05962	5.1459	5.09697	4.80993	4.89189	4.80623	4.72112	5.3616	5.17426	4.98405	4.99837	5.01127	5.10371	5.2479	4.95272	5.24093	4.89357	4.64108	4.60956	4.77169	5.1029	5.08178	5.00799	5.03541	5.04737	5.13322	5.19534	5.13733
2054.23	5.17105	5.01393	5.35165	4.98745	4.97081	4.90283	4.90973	4.91739	5.08794	5.11537	5.00953	4.99577	5.07063	5.16154	5.13624	4.82591	4.9174	4.80304	4.72077	5.35489	5.11924	4.95774	5.03519	5.02003	5.15492	5.3551	4.90883	5.33754	4.91301	4.63688	4.61346	4.7604	5.05389	5.04596	4.97315	5.01011	5.07233	5.10188	5.15928	5.11186
2052.55	5.284	5.001	5.41962	5.03944	4.97099	4.90321	4.89608	4.92497	5.16583	5.07413	5.01821	5.01661	5.09846	5.14442	5.06551	4.83504	4.91847	4.7944	4.72788	5.30999	5.17707	4.91491	5.0662	5.06345	5.16745	5.44881	4.87723	5.28631	4.91892	4.62724	4.61783	4.75932	5.0621	5.04462	4.95483	4.99436	5.08298	5.07723	5.13473	5.07695
2050.86	5.27226	4.98572	5.36907	5.03635	4.99076	4.89314	4.88696	4.93504	5.14856	5.0468	5.04496	5.03566	5.06444	5.06048	5.04508	4.83894	4.91601	4.78628	4.7432	5.28252	5.33257	4.89537	5.08543	4.99205	5.13383	5.47856	4.85481	5.26344	4.92875	4.61383	4.62412	4.76813	5.06353	5.06373	4.95324	5.0028	5.04232	5.05435	5.12732	5.08364
2049.18	5.20053	4.98012	5.41399	5.02801	5.01974	4.87929	4.89414	4.92844	5.21073	5.03574	5.06916	5.03416	5.04786	5.1214	5.02255	4.83277	4.89594	4.77742	4.75165	5.26428	5.32709	4.87844	5.03876	5.05142	5.11835	5.41726	4.85194	5.1636	4.92793	4.59544	4.63125	4.79082	5.07099	5.02323	4.94951	5.01531	5.01928	5.0362	5.14409	5.08551
2047.5	5.22876	4.96822	5.34697	5.03218	5.04679	4.86619	4.91365	4.92132	5.14277	5.04224	5.10794	5.02753	5.04438	5.03498	4.99475	4.82544	4.9037	4.77764	4.74249	5.20711	5.24518	4.86089	5.00984	5.03348	5.02524	5.40757	4.87412	5.08949	4.91038	4.58071	4.63077	4.81674	5.09903	5.01215	4.94246	5.00112	4.97939	5.01974	5.14998	5.06826
2045.83	5.19804	4.94357	5.25621	5.03448	5.04085	4.88426	4.95362	4.92184	5.0786	5.04315	5.10033	5.00821	5.02108	4.99699	5.04934	4.81789	4.90894	4.79755	4.73772	5.25339	5.1333	4.85499	4.99515	4.93286	4.97632	5.40414	4.90669	5.06694	4.90839	4.56662	4.61744	4.83887	5.07014	5.00901	4.9544	4.99265	4.94393	4.99345	5.18732	5.02209
2044.15	5.17939	4.90728	5.2338	5.04753	5.04285	4.92785	5.00495	4.92386	5.03261	5.03536	5.07858	5.00026	5.02402	4.98452	5.02002	4.84146	4.92476	4.81194	4.73464	5.30167	5.12815	4.87223	4.97524	4.92207	4.94258	5.34885	4.85835	5.0793	4.8716	4.55797	4.59948	4.8435	5.03205	5.0209	4.9563	4.96607	4.91308	4.96035	5.23884	4.97948
2042.48	5.1989	4.88319	5.25494	5.02664	5.00761	4.98371	5.03883	4.92333	5.00146	5.04122	5.04685	5.01238	5.05087	4.97922	5.01408	4.88509	4.95389	4.81892	4.74108	5.31983	5.15902	4.8935	4.97607	5.00956	4.95379	5.31772	4.93242	5.09193	4.86429	4.56282	4.58158	4.84039	5.02236	5.0997	4.96885	4.95349	4.88461	4.9479	5.22529	4.96172
2040.82	5.17007	4.88023	5.24661	5.00653	4.99891	4.99262	5.03661	4.92799	4.99608	5.05638	4.99561	5.02608	5.08072	4.98638	5.0199	4.94643	4.95889	4.81537	4.74283	5.30798	5.11618	4.9074	4.98482	4.99225	4.95776	5.25347	4.87252	5.08136	4.85802	4.5703	4.56885	4.85432	5.03906	5.03387	4.96827	4.93533	4.87149	4.92339	5.21612	4.95882
2039.15	5.24153	4.87812	5.25588	4.99673	4.96547	4.97486	5.04091	4.94478	5.00957	5.06463	4.96053	5.01701	5.07523	4.99238	5.03935	4.95324	4.92653	4.80577	4.73823	5.26673	5.23249	4.90214	4.96816	4.95709	4.93929	5.24578	4.85172	5.04801	4.86368	4.58594	4.56107	4.87493	5.05401	5.03614	4.9685	4.93272	4.87532	4.91315	5.14732	4.97526
2037.49	5.17777	4.87627	5.33871	4.99085	4.96236	4.93681	5.03742	4.97117	5.01154	5.06158	4.94787	4.99556	5.07207	5.00968	5.0365	4.91885	4.88841	4.79667	4.73539	5.28157	5.08189	4.89545	4.95709	4.91204	4.927	5.13514	4.83796	5.03316	4.8425	4.58968	4.55523	4.87826	5.08405	5.08867	4.98722	4.92772	4.87722	4.91342	5.14711	4.98854
2035.83	5.12398	4.88876	5.35301	4.9678	4.97022	4.91387	5.05309	4.97859	5.01081	5.01894	4.93275	4.96872	5.0374	5.02261	4.98631	4.90346	4.87458	4.78839	4.73638	5.24636	5.00799	4.91631	4.92636	4.88063	4.90361	5.20221	4.82827	4.98844	4.82422	4.59229	4.54527	4.87738	5.03036	5.08871	5.01117	4.93096	4.86506	4.92032	5.06977	4.99599
2034.17	5.05832	4.8883	5.3486	4.94038	4.99054	4.93294	5.06543	4.99515	5.01966	4.94798	4.93671	4.95901	5.01784	5.05885	4.94758	4.88254	4.88603	4.77933	4.74655	5.18657	5.00502	4.91112	4.93068	4.86456	4.87276	5.20619	4.81863	4.95906	4.81882	4.59163	4.53934	4.86813	4.99766	5.00827	5.02441	4.93486	4.86304	4.92864	5.02762	5.00031
2032.52	4.9926	4.8643	5.20089	4.9291	4.99097	4.96728	5.05427	5.00164	4.96303	4.90724	4.93638	4.94277	5.02154	5.04819	4.91671	4.86686	4.85336	4.76308	4.74402	5.17922	4.98657	4.8964	4.96511	4.85838	4.84833	5.22812	4.8129	4.91668	4.82719	4.58498	4.5396	4.8776	4.98718	5.02213	5.04682	4.92617	4.85434	4.94089	4.99028	4.95929
2030.87	4.95758	4.84878	5.27775	4.93052	4.97984	5.01327	5.05073	5.01926	4.93716	4.89173	4.95108	4.94104	5.02323	5.03868	4.90784	4.85494	4.8599	4.76144	4.7481	5.14976	4.9519	4.87988	4.94356	4.85467	4.8473	5.22034	4.81355	4.88939	4.85056	4.5839	4.54444	4.8992	4.99103	5.08828	5.05451	4.92216	4.86432	4.93128	4.93857	4.91044
2029.22	4.96581	4.83065	5.28922	4.92528	4.96375	5.025	5.05267	5.02988	4.92392	4.88786	4.96851	4.95276	5.01378	5.01295	4.91854	4.8518	4.87098	4.77428	4.76688	5.13418	4.92869	4.87821	4.95356	4.83738	4.8516	5.20413	4.81288	4.88836	4.86271	4.58075	4.54434	4.90972	4.97663	5.0048	5.05563	4.92609	4.88324	4.91167	4.88768	4.85551
2027.58	4.99476	4.81945	5.38155	4.91459	4.94152	4.9845	5.07955	5.02717	4.93774	4.89674	4.97953	4.9605	4.99482	4.96402	4.91992	4.89823	4.869	4.78316	4.77298	5.12819	4.911	4.87055	4.96345	4.81213	4.86479	5.17656	4.8013	4.89095	4.84638	4.57112	4.53352	4.92189	4.95976	4.93546	5.04561	4.93931	4.83708	4.90675	4.85517	4.82346
2025.93	5.03482	4.81195	5.36832	4.89843	4.94649	4.95456	5.08342	5.00147	4.88527	4.90836	4.95994	4.9464	4.99561	4.9426	4.92342	4.83536	4.93442	4.79048	4.76481	5.15291	4.9152	4.85498	5.00523	4.78604	4.85764	5.13948	4.79229	4.8963	4.83059	4.54559	4.51614	4.90362	4.93978	4.90861	5.02803	4.92191	4.79721	4.89373	4.84643	4.81132
2024.29	5.0432	4.8017	5.36109	4.88975	4.96731	4.95262	5.11195	4.9638	4.87975	4.92806	4.94186	4.92092	5.00373	4.92991	4.91754	4.89496	4.89849	4.80358	4.74482	5.05688	4.93856	4.83332	5.00002	4.78621	4.8281	5.14157	4.7893	4.90915	4.83249	4.52089	4.50229	4.88265	4.95944	4.89702	5.00377	4.86923	4.77232	4.88254	4.85581	4.81338
2022.65	5.0253	4.79105	5.29303	4.8938	4.97532	4.95513	5.06335	4.93374	4.88716	4.93744	4.95607	4.88957	5.01304	4.92708	4.9252	4.8872	4.90587	4.81144	4.72304	5.04115	4.9351	4.80951	5.00125	4.80428	4.80159	5.13251	4.78282	4.92265	4.82427	4.50756	4.49133	4.86744	4.96568	4.87692	4.97694	4.82208	4.7716	4.84879	4.85604	4.8102
2021.02	5.00035	4.79093	5.25438	4.87443	4.95022	4.93913	5.03043	4.92979	4.93017	4.95253	4.97954	4.9005	5.01962	4.93725	4.91635	4.8967	4.90768	4.83544	4.71549	5.05882	4.91789	4.79476	4.98817	4.82913	4.79008	5.08223	4.76953	4.92893	4.81868	4.50193	4.48153	4.85685	4.94874	4.84331	4.9364	4.76959	4.77955	4.81976	4.84497	4.80247
2019.39	4.96213	4.80098	5.24529	4.86589	4.9092	4.93735	4.99546	4.93742	4.95819	4.95892	5.00826	4.93172	5.01318	4.94064	4.89078	4.91566	4.90615	4.84856	4.71656	5.00983	4.9092	4.7814	4.96931	4.83883	4.77873	5.05898	4.76071	4.94608	4.81222	4.50774	4.47844	4.84209	4.91787	4.81266	4.92491	4.74157	4.78989	4.8157	4.82005	4.79539
2017.76	4.93186	4.80377	5.27676	4.83313	4.86619	4.9363	4.9746	4.94329	4.94225	4.9863	5.00759	4.96669	5.00672	4.92833	4.8612	4.92096	4.89797	4.83619	4.72111	4.98838	4.87834	4.77546	4.94788	4.83535	4.77011	5.03103	4.75209	4.91526	4.80818	4.51647	4.47715	4.83241	4.89798	4.79352	4.9317	4.73262	4.78695	4.83764	4.80932	4.79645
2016.13	4.93364	4.79256	5.27645	4.81707	4.84171	4.94496	4.9665	4.95276	4.8702	4.99129	4.99846	4.96681	4.97196	4.9307	4.83577	4.91428	4.88739	4.81915	4.72974	4.9653	4.85103	4.7729	4.92992	4.81328	4.74893	4.99578	4.7367	4.88584	4.80907	4.51549	4.47645	4.84387	4.9045	4.78886	4.94977	4.74728	4.76477	4.86776	4.81052	4.79115
2014.5	4.94881	4.7738	5.21751	4.80417	4.83913	4.97936	4.98744	4.94191	4.83666	4.9869	4.98534	4.93561	4.94857	4.91414	4.8223	4.90729	4.88482	4.80514	4.74188	4.91991	4.82476	4.78288	4.92161	4.79086	4.74006	4.9638	4.71359	4.85321	4.80782	4.50972	4.47204	4.86235	4.9055	4.77464	4.94258	4.76994	4.75514	4.89405	4.81569	4.77787
2012.88	4.95244	4.75308	5.17845	4.80399	4.85764	4.99662	5.00316	4.94127	4.82162	4.97279	4.95708	4.89011	4.93823	4.91429	4.82263	4.90421	4.90192	4.79333	4.75569	4.888	4.79916	4.78745	4.92509	4.76589	4.72963	4.93646	4.68362	4.82043	4.79915	4.49622	4.46281	4.88793	4.91592	4.75904	4.93198	4.79033	4.7578	4.87706	4.80306	4.77143
2011.26	4.9388	4.72468	5.16273	4.80909	4.87112	4.99095	4.99085	4.9274	4.81745	4.93345	4.94744	4.86697	4.92219	4.91982	4.83341	4.89677	4.92018	4.78866	4.77048	4.86773	4.79871	4.78445	4.92623	4.7596	4.72326	4.91394	4.65315	4.79769	4.79436	4.48586	4.45398	4.88766	4.8999	4.745	4.91655	4.79847	4.75663	4.83764	4.77673	4.76196
2009.65	4.90561	4.69421	5.19588	4.81331	4.86511	4.96766	4.96888	4.92617	4.80231	4.89809	4.92377	4.8767	4.921	4.9316	4.8393	4.88069	4.94728	4.77376	4.78518	4.84597	4.82144	4.75649	4.91716	4.78601	4.72001	4.90989	4.63958	4.7831	4.78187	4.48243	4.44529	4.86522	4.87361	4.73161	4.90578	4.79442	4.75573	4.81464	4.76588	4.75465
2008.03	4.87491	4.65799	5.21157	4.82498	4.85443	4.94885	4.93383	4.91971	4.79165	4.86265	4.90874	4.89299	4.91423	4.95561	4.83592	4.87673	4.95777	4.76141	4.79187	4.82879	4.86214	4.73491	4.89929	4.82471	4.71386	4.91924	4.64961	4.77272	4.76515	4.48396	4.43536	4.84547	4.83919	4.72842	4.90399	4.78631	4.75594	4.79751	4.7617	4.73889
2006.42	4.84114	4.63313	5.28428	4.83497	4.83621	4.90934	4.89675	4.90063	4.77967	4.86674	4.9053	4.90645	4.91162	4.96771	4.81835	4.8868	4.96577	4.76357	4.78745	4.81542	4.87688	4.71818	4.88712	4.8359	4.70538	4.93783	4.66743	4.7616	4.75407	4.48281	4.42454	4.85005	4.80163	4.72752	4.89653	4.76893	4.75101	4.78577	4.76404	4.71794
2004.81	4.8258	4.61901	5.30269	4.84425	4.83461	4.8842	4.86053	4.88396	4.78319	4.87274	4.90685	4.90557	4.92329	4.95573	4.79501	4.8801	4.98731	4.78136	4.76597	4.81726	4.86749	4.72515	4.88506	4.80912	4.70016	4.93616	4.6786	4.75859	4.74524	4.47944	4.41393	4.87382	4.76817	4.71384	4.88863	4.75794	4.74371	4.78763	4.76996	4.69926
2003.21	4.82927	4.62684	5.28046	4.83069	4.83081	4.85919	4.83827	4.85657	4.77836	4.89068	4.90475	4.92152	4.93957	4.91287	4.77949	4.87053	4.98562	4.79922	4.74039	4.8151	4.84058	4.73066	4.87139	4.76667	4.69683	4.93639	4.67455	4.7499	4.73584	4.47506	4.40385	4.88831	4.74629	4.69714	4.87781	4.76086	4.72737	4.78348	4.76556	4.68542
2001.6	4.84612	4.64444	5.23675	4.81395	4.8122	4.8511	4.83725	4.84369	4.77274	4.90616	4.89026	4.94597	4.94697	4.87533	4.77205	4.87622	4.98352	4.80499	4.7243	4.799	4.8364	4.74091	4.86078	4.7406	4.70761	4.90527	4.65804	4.74695	4.72756	4.47205	4.40051	4.87853	4.73055	4.68408	4.85433	4.77961	4.71827	4.77835	4.76066	4.68208
2000	4.8639	4.66729	5.17929	4.79876	4.79139	4.83799	4.85922	4.83882	4.77855	4.91965	4.88857	4.95352	4.94368	4.85977	4.77283	4.90244	4.97314	4.79815	4.72132	4.77942	4.83248	4.7442	4.84776	4.74372	4.71161	4.87746	4.63719	4.74554	4.71899	4.46837	4.40082	4.8449	4.72212	4.68174	4.83714	4.79558	4.71796	4.75831	4.75031	4.67765
1998.4	4.86004	4.67908	5.18199	4.77933	4.78196	4.82065	4.86497	4.83702	4.78424	4.92318	4.89037	4.95683	4.94597	4.85116	4.7721	4.9083	4.92638	4.79266	4.72636	4.76546	4.80857	4.72969	4.84642	4.74202	4.69733	4.85568	4.61808	4.73049	4.70722	4.46508	4.40345	4.81145	4.71048	4.69541	4.8293	4.78105	4.71832	4.73422	4.74159	4.67584
1996.81	4.85306	4.68117	5.24085	4.76157	4.78691	4.81059	4.86734	4.84377	4.78628	4.92462	4.88775	4.91932	4.94142	4.84285	4.7678	4.91216	4.88712	4.79671	4.73706	4.76254	4.77527	4.70852	4.86059	4.7333	4.67413	4.85062	4.61025	4.72142	4.69609	4.46241	4.40681	4.80174	4.6994	4.71156	4.82995	4.74888	4.70915	4.7155	4.73692	4.67429
1995.21	4.83928	4.67526	5.19341	4.7467	4.77907	4.81068	4.84365	4.84623	4.77612	4.93165	4.88505	4.90016	4.90952	4.84061	4.756	4.90843	4.88528	4.81218	4.74249	4.76871	4.7507	4.68671	4.87246	4.71299	4.66066	4.85163	4.60507	4.71764	4.69699	4.46213	4.40745	4.80886	4.69528	4.70929	4.8377	4.72618	4.69569	4.70562	4.72087	4.6804
1993.62	4.82033	4.66641	5.13701	4.72359	4.77433	4.82115	4.81025	4.8336	4.76264	4.93525	4.86585	4.89807	4.86548	4.84299	4.74513	4.91768	4.90093	4.82446	4.73681	4.76626	4.74185	4.67474	4.88019	4.69345	4.65145	4.85702	4.59482	4.7158	4.70528	4.46173	4.40164	4.81484	4.70097	4.69677	4.83225	4.70969	4.69167	4.70529	4.70392	4.68661
1992.03	4.79626	4.65402	5.09881	4.69695	4.77196	4.82483	4.78028	4.81535	4.75038	4.93307	4.86062	4.89147	4.82458	4.84146	4.73882	4.93191	4.94036	4.82875	4.72257	4.76	4.74246	4.67548	4.8766	4.68338	4.6543	4.86679	4.59001	4.69788	4.71332	4.45895	4.39175	4.81064	4.70801	4.67876	4.81246	4.69903	4.68738	4.70993	4.68601	4.69307
1990.45	4.77953	4.63004	5.05422	4.6753	4.76744	4.83597	4.76487	4.79686	4.75259	4.92019	4.85854	4.87553	4.80374	4.86535	4.72862	4.95108	4.99082	4.83233	4.7167	4.74216	4.73427	4.68376	4.85405	4.66959	4.65413	4.85423	4.59171	4.67401	4.71501	4.45135	4.38175	4.80299	4.70947	4.65803	4.77729	4.69062	4.68258	4.70656	4.67375	4.6857
1988.86	4.76486	4.6043	5.03606	4.66965	4.75165	4.83198	4.77496	4.78479	4.75913	4.90649	4.86141	4.85742	4.80694	4.86559	4.73243	4.95439	4.91263	4.83092	4.70997	4.72086	4.72265	4.68365	4.84034	4.66284	4.65487	4.82689	4.58966	4.65821	4.72339	4.4355	4.3744	4.78234	4.70559	4.64401	4.74901	4.68794	4.6857	4.69472	4.66287	4.66268
1987.28	4.75567	4.58707	5.0379	4.67291	4.73655	4.82173	4.78683	4.79331	4.75786	4.89745	4.8642	4.85872	4.81342	4.8695	4.72756	4.91707	4.90041	4.82895	4.69824	4.70406	4.71854	4.67465	4.8289	4.65812	4.67006	4.79651	4.58321	4.64958	4.7236	4.42362	4.37464	4.76386	4.69327	4.63903	4.7233	4.66982	4.6923	4.67784	4.65604	4.62793
1985.7	4.75072	4.58199	5.06052	4.6749	4.72705	4.81258	4.7979	4.79363	4.75732	4.89102	4.86569	4.87264	4.81166	4.8654	4.7075	4.87932	4.93741	4.81894	4.68501	4.68978	4.72888	4.6523	4.82613	4.67028	4.67515	4.78369	4.56551	4.64046	4.72327	4.41768	4.37453	4.75524	4.67563	4.64146	4.71813	4.65598	4.69736	4.66466	4.65846	4.59889
1984.13	4.74348	4.58124	5.07287	4.6704	4.71702	4.80157	4.79715	4.8051	4.74106	4.88242	4.88271	4.86381	4.79849	4.83762	4.6758	4.85087	4.933	4.795	4.6704	4.6815	4.74081	4.62785	4.8273	4.67604	4.67606	4.77783	4.54822	4.63274	4.71415	4.4169	4.37254	4.75949	4.66205	4.65039	4.71343	4.64343	4.69413	4.65814	4.6632	4.5833
1982.55	4.71968	4.58304	5.05802	4.66314	4.71228	4.787	4.79248	4.80668	4.73101	4.87677	4.89897	4.84612	4.78953	4.80281	4.65277	4.84099	4.95987	4.7738	4.6641	4.66989	4.74482	4.6113	4.82631	4.67346	4.66929	4.77336	4.54034	4.62392	4.71248	4.42037	4.36963	4.77812	4.65011	4.65377	4.72193	4.64119	4.6812	4.662	4.66507	4.58192
1980.98	4.69346	4.576	5.03737	4.6441	4.70806	4.77305	4.79208	4.8062	4.72354	4.87422	4.89737	4.81434	4.79317	4.7797	4.63415	4.84654	4.9847	4.76113	4.66663	4.6574	4.74884	4.61034	4.82053	4.67217	4.65411	4.76586	4.54013	4.61522	4.69961	4.42631	4.36129	4.78659	4.6388	4.64656	4.72692	4.643	4.67858	4.66097	4.66192	4.58774
1979.41	4.6858	4.55982	5.01396	4.63047	4.69827	4.75758	4.77871	4.80457	4.72158	4.8667	4.88428	4.78794	4.80194	4.77366	4.62298	4.86476	4.98658	4.76787	4.66768	4.65009	4.75428	4.62037	4.82468	4.67291	4.64369	4.7622	4.54036	4.60936	4.68527	4.43122	4.35732	4.78017	4.63489	4.63582	4.71722	4.64715	4.68286	4.6567	4.6561	4.60345
1977.85	4.68477	4.54168	4.98553	4.62719	4.69081	4.74887	4.76229	4.80046	4.73124	4.85738	4.85847	4.77424	4.80821	4.78706	4.6244	4.86125	4.94293	4.76662	4.6687	4.64799	4.75584	4.62479	4.82583	4.67793	4.63828	4.75824	4.54109	4.61193	4.68093	4.43136	4.35357	4.77673	4.62078	4.61898	4.7067	4.65528	4.69631	4.64563	4.64547	4.61219
1976.28	4.68961	4.52802	4.96196	4.63725	4.68434	4.74782	4.76187	4.79325	4.72685	4.85404	4.84989	4.78474	4.82232	4.80245	4.6389	4.86067	4.93235	4.75478	4.66066	4.65339	4.74318	4.62187	4.82607	4.66966	4.63942	4.75425	4.54197	4.61627	4.68583	4.42812	4.35004	4.76801	4.60788	4.60084	4.69467	4.66506	4.70604	4.6402	4.62885	4.61071
1974.72	4.69025	4.52423	4.93389	4.64606	4.67603	4.74971	4.75703	4.78392	4.7106	4.86234	4.85971	4.81249	4.84015	4.81666	4.65463	4.85314	4.91787	4.73736	4.66009	4.66009	4.72636	4.61777	4.81564	4.65542	4.63723	4.75114	4.53934	4.61445	4.69073	4.42054	4.34646	4.76024	4.595	4.5812	4.6817	4.67407	4.70053	4.63653	4.61744	4.58606
1973.16	4.69407	4.52042	4.92229	4.64378	4.67907	4.75033	4.74353	4.76084	4.68716	4.87104	4.87649	4.83371	4.84392	4.80307	4.6522	4.85465	4.91502	4.71818	4.66285	4.66275	4.72062	4.61585	4.80482	4.63279	4.64379	4.74686	4.53989	4.61493	4.6879	4.40609	4.34352	4.76585	4.58334	4.57558	4.67445	4.67726	4.68563	4.64579	4.6088	4.56469
1971.61	4.70378	4.51889	4.90501	4.63579	4.67296	4.74033	4.7166	4.73279	4.6723	4.87495	4.86426	4.84745	4.8245	4.78202	4.64267	4.86379	4.90399	4.72934	4.66307	4.65357	4.72907	4.61144	4.78254	4.61588	4.65873	4.74081	4.53247	4.61692	4.67646	4.38808	4.33866	4.77522	4.58171	4.5724	4.66174	4.68449	4.66658	4.6585	4.60942	4.54839
1970.06	4.70842	4.51972	4.90519	4.62866	4.66668	4.71359	4.68599	4.703	4.66724	4.87384	4.83569	4.84807	4.8131	4.77153	4.63171	4.88468	4.87829	4.75682	4.66063	4.63901	4.74495	4.60997	4.75739	4.605	4.66278	4.72159	4.52416	4.61405	4.66297	4.37147	4.3339	4.78264	4.58349	4.57343	4.6527	4.67613	4.65416	4.66049	4.6126	4.54229
1968.5	4.69923	4.52288	4.92024	4.62786	4.66143	4.68911	4.65651	4.68339	4.66965	4.84956	4.82368	4.82723	4.79238	4.76003	4.63273	4.92222	4.84837	4.78039	4.65031	4.62006	4.75767	4.60211	4.73323	4.60398	4.66656	4.69792	4.51777	4.61492	4.65422	4.3608	4.32951	4.78147	4.58176	4.57542	4.64734	4.67366	4.65131	4.65103	4.61658	4.54382
1966.96	4.67677	4.52593	4.94661	4.62674	4.65502	4.6755	4.64877	4.6688	4.67542	4.81387	4.82478	4.81774	4.7822	4.75346	4.63322	4.95204	4.83393	4.79673	4.63063	4.61062	4.76128	4.59859	4.72539	4.61072	4.65904	4.69023	4.51538	4.6017	4.64888	4.35886	4.32791	4.76463	4.58057	4.57349	4.64144	4.66284	4.65299	4.62992	4.61596	4.53886
1965.41	4.66029	4.52133	4.9931	4.62353	4.65635	4.67426	4.66151	4.66768	4.67992	4.7885	4.8346	4.81092	4.78803	4.74829	4.62621	4.93211	4.83283	4.80728	4.61637	4.60802	4.75055	4.60176	4.72382	4.61836	4.66333	4.69191	4.51588	4.59026	4.64963	4.36235	4.33148	4.73978	4.57416	4.58087	4.64399	4.66312	4.65867	4.61526	4.61832	4.53601
1963.86	4.66429	4.51159	4.99418	4.61803	4.6592	4.67324	4.68445	4.67404	4.69344	4.77905	4.83052	4.80466	4.80905	4.76204	4.62099	4.88019	4.85534	4.80324	4.6102	4.60707	4.73847	4.61083	4.71972	4.62021	4.67255	4.69962	4.51225	4.58187	4.65119	4.36381	4.33744	4.71099	4.57273	4.5882	4.64526	4.65693	4.65973	4.60153	4.61635	4.53532
1962.32	4.67403	4.50598	4.95684	4.61549	4.66205	4.67624	4.70785	4.68558	4.69259	4.7887	4.8438	4.79935	4.83247	4.78086	4.61457	4.83299	4.87249	4.78051	4.60802	4.60089	4.72382	4.61892	4.70676	4.61563	4.69287	4.71095	4.50655	4.57847	4.65337	4.36635	4.34167	4.70349	4.57129	4.59312	4.6383	4.65149	4.65365	4.5974	4.60519	4.53584
1960.78	4.68692	4.50418	4.92325	4.61288	4.65959	4.68058	4.71691	4.69186	4.6875	4.78713	4.85611	4.79634	4.84143	4.79956	4.60727	4.81971	4.85796	4.76243	4.60372	4.59217	4.71883	4.62056	4.69621	4.61449	4.69326	4.71263	4.5012	4.57339	4.65216	4.36538	4.34112	4.71005	4.56954	4.59245	4.62454	4.64539	4.64233	4.59015	4.58878	4.53365
1959.25	4.6855	4.50371	4.91149	4.60616	4.66214	4.68557	4.70855	4.68525	4.6797	4.78031	4.87284	4.79298	4.84363	4.81026	4.60417	4.82218	4.85873	4.74508	4.59733	4.59295	4.70188	4.60602	4.69076	4.60572	4.68843	4.7045	4.49678	4.56937	4.64392	4.36508	4.33468	4.72406	4.56898	4.58829	4.61397	4.63304	4.6401	4.58364	4.57715	4.52805
1957.71	4.67626	4.49966	4.91208	4.605	4.66085	4.68856	4.69104	4.67138	4.67547	4.77573	4.87636	4.78677	4.84697	4.80282	4.59761	4.8264	4.86253	4.73213	4.60052	4.5972	4.69212	4.58905	4.69185	4.59208	4.68644	4.68443	4.4961	4.56259	4.63821	4.3649	4.32964	4.72725	4.56705	4.58534	4.61175	4.63284	4.64878	4.5865	4.57872	4.52356
1956.18	4.6706	4.49347	4.89605	4.59915	4.66535	4.68089	4.68415	4.66254	4.6697	4.7909	4.8678	4.77253	4.85023	4.80292	4.59379	4.82295	4.87647	4.73377	4.60847	4.60743	4.69477	4.58344	4.69942	4.57768	4.68769	4.66663	4.4955	4.55474	4.631	4.36103	4.32538	4.72023	4.56778	4.57835	4.61827	4.63338	4.65734	4.58489	4.5862	4.52547
1954.65	4.66762	4.49026	4.87084	4.60058	4.67152	4.67081	4.68079	4.66308	4.67567	4.79849	4.85576	4.7641	4.85427	4.79902	4.60219	4.81047	4.88267	4.74514	4.61949	4.60511	4.71889	4.57737	4.69698	4.57517	4.68697	4.6639	4.49606	4.53876	4.62535	4.35251	4.32646	4.71017	4.57519	4.57525	4.6298	4.63827	4.66473	4.58535	4.59378	4.52974
1953.12	4.67131	4.48933	4.84934	4.59226	4.67607	4.65829	4.67818	4.67078	4.68636	4.81512	4.84759	4.74897	4.84172	4.80764	4.60504	4.80947	4.88007	4.75335	4.62448	4.59234	4.74479	4.57804	4.69517	4.58515	4.66262	4.66734	4.49335	4.52877	4.62391	4.34375	4.32897	4.71178	4.58247	4.57136	4.62824	4.63674	4.66564	4.59406	4.59719	4.53639
1951.6	4.6626	4.48906	4.82864	4.58405	4.66809	4.6608	4.66723	4.67745	4.68613	4.82912	4.83639	4.75066	4.82835	4.81368	4.61567	4.80967	4.85141	4.75891	4.61464	4.56792	4.76972	4.58054	4.68966	4.58528	4.63747	4.67086	4.49457	4.52423	4.62163	4.339	4.33158	4.71634	4.5809	4.56819	4.6212	4.62859	4.66994	4.6102	4.59326	4.53816
1950.08	4.66084	4.49095	4.82015	4.57703	4.65037	4.66128	4.66017	4.66618	4.67225	4.84074	4.83382	4.7644	4.80801	4.81385	4.63002	4.81006	4.83749	4.75421	4.60214	4.56387	4.7782	4.58207	4.68532	4.58797	4.617	4.66658	4.49123	4.53238	4.61899	4.34121	4.33159	4.71156	4.57338	4.56163	4.61518	4.62147	4.68573	4.62041	4.58707	4.53128
1948.56	4.66319	4.49554	4.82968	4.57098	4.63595	4.65506	4.66308	4.64693	4.65068	4.83846	4.82728	4.78655	4.79055	4.80269	4.6394	4.78906	4.8229	4.74879	4.59296	4.5707	4.76415	4.5831	4.67531	4.585	4.61827	4.65421	4.48619	4.54285	4.61102	4.34735	4.33247	4.69658	4.56297	4.54971	4.60925	4.62072	4.70333	4.61609	4.57841	4.52372
1947.04	4.66991	4.50637	4.84498	4.5645	4.62618	4.64478	4.67882	4.63851	4.63559	4.83904	4.82542	4.80803	4.78405	4.78533	4.64182	4.7738	4.81644	4.74427	4.5905	4.58026	4.7351	4.57997	4.66795	4.58947	4.62923	4.66548	4.48089	4.54727	4.60379	4.35604	4.33117	4.68154	4.55716	4.5263	4.60804	4.62614	4.70085	4.60274	4.57139	4.51112
1945.53	4.67071	4.51742	4.87216	4.55988	4.62644	4.64376	4.68731	4.63489	4.6352	4.84976	4.82215	4.8118	4.79675	4.75181	4.63817	4.76653	4.82295	4.72804	4.59807	4.58527	4.71063	4.57462	4.66868	4.59662	4.64806	4.68375	4.47649	4.54569	4.59885	4.35994	4.33101	4.67219	4.55782	4.50703	4.60664	4.63301	4.69112	4.58914	4.56749	4.49611
1944.01	4.65922	4.51661	4.87666	4.55568	4.62472	4.65189	4.67813	4.63318	4.64769	4.86578	4.81337	4.79834	4.806	4.72752	4.62658	4.76183	4.82547	4.7127	4.60451	4.57661	4.69008	4.55884	4.66846	4.60271	4.66872	4.6894	4.47179	4.53946	4.59859	4.36016	4.33183	4.67897	4.56349	4.50183	4.60313	4.62432	4.67581	4.58095	4.55919	4.47784
1942.5	4.64748	4.50866	4.87276	4.55438	4.62471	4.67342	4.6685	4.63025	4.6729	4.85305	4.79845	4.78798	4.80379	4.72066	4.6196	4.74944	4.83008	4.70808	4.61047	4.56954	4.6709	4.55273	4.66448	4.59851	4.69176	4.67025	4.47006	4.53841	4.60345	4.35959	4.32963	4.68156	4.56605	4.5082	4.59695	4.6193	4.6706	4.57429	4.5552	4.464
1940.99	4.64241	4.49197	4.8513	4.56277	4.62624	4.68736	4.65584	4.62024	4.69142	4.81971	4.78409	4.78541	4.78562	4.73013	4.61458	4.73777	4.84451	4.70979	4.61302	4.56525	4.6671	4.5557	4.65523	4.60325	4.71145	4.64354	4.467	4.53884	4.61031	4.36097	4.32592	4.68072	4.57069	4.51875	4.59759	4.62196	4.67179	4.56399	4.55709	4.45941
1939.49	4.64276	4.48416	4.8297	4.574	4.63844	4.68706	4.649	4.61243	4.70357	4.78471	4.77327	4.79247	4.7662	4.74005	4.61894	4.73359	4.86532	4.71966	4.61924	4.55995	4.67045	4.56746	4.63867	4.60482	4.72048	4.61555	4.47	4.54006	4.60938	4.36666	4.32329	4.67226	4.57771	4.52356	4.5954	4.63701	4.68153	4.55211	4.55956	4.465
1937.98	4.63967	4.48023	4.81199	4.57787	4.64135	4.66949	4.6427	4.60474	4.70521	4.77626	4.77692	4.79285	4.75308	4.74107	4.61565	4.74375	4.87472	4.73025	4.62407	4.55479	4.68215	4.57984	4.62406	4.61209	4.71892	4.60474	4.47489	4.53276	4.60202	4.36827	4.32156	4.67252	4.58841	4.53122	4.60626	4.66157	4.6868	4.54472	4.55755	4.47951
1936.48	4.64452	4.47571	4.8089	4.5738	4.6384	4.64596	4.63775	4.60575	4.69774	4.79467	4.78846	4.79322	4.75079	4.73627	4.60738	4.75173	4.87815	4.74045	4.62921	4.54505	4.69123	4.58612	4.61608	4.6174	4.70747	4.60898	4.47197	4.52303	4.59741	4.36999	4.32178	4.68298	4.59632	4.53779	4.61999	4.66868	4.68255	4.53952	4.54977	4.49176
1934.98	4.65928	4.46827	4.79892	4.56759	4.63319	4.63201	4.64762	4.61027	4.69318	4.82424	4.79329	4.80336	4.74779	4.73337	4.59839	4.75608	4.85843	4.74471	4.62431	4.53864	4.69366	4.57581	4.61132	4.61195	4.69851	4.61723	4.46666	4.5123	4.60099	4.37298	4.32093	4.69707	4.59429	4.54037	4.64783	4.67457	4.67171	4.5313	4.5475	4.49939
1933.49	4.66704	4.46323	4.77129	4.55597	4.62032	4.62852	4.65506	4.61516	4.68239	4.82537	4.79407	4.82006	4.74895	4.73552	4.59983	4.75994	4.84999	4.74552	4.61959	4.52857	4.68483	4.55918	4.61275	4.60118	4.6875	4.6285	4.46116	4.50771	4.61464	4.37281	4.31825	4.69927	4.58855	4.53428	4.6745	4.68977	4.65737	4.52389	4.54686	4.49814
1931.99	4.67532	4.46149	4.74484	4.54412	4.61588	4.63612	4.66309	4.61679	4.67783	4.82209	4.79609	4.83674	4.75888	4.74647	4.60348	4.76467	4.84144	4.74089	4.615	4.52566	4.66685	4.5467	4.60922	4.59558	4.68421	4.62969	4.46582	4.50658	4.62649	4.37187	4.3138	4.69815	4.57748	4.52557	4.69242	4.7059	4.63899	4.51517	4.55169	4.49627
1930.5	4.68483	4.46217	4.73027	4.53367	4.61207	4.63747	4.66247	4.61666	4.67846	4.81784	4.8091	4.84673	4.76694	4.75265	4.6046	4.76974	4.8315	4.72938	4.61444	4.52211	4.65185	4.54223	4.61273	4.58801	4.67992	4.62891	4.47529	4.50264	4.63164	4.36834	4.30999	4.69242	4.57548	4.52501	4.68769	4.73841	4.6267	4.51344	4.55122	4.49117
1929.01	4.68979	4.46195	4.72835	4.53376	4.61606	4.6486	4.65633	4.6182	4.68177	4.80027	4.82768	4.8376	4.78111	4.74721	4.60989	4.76718	4.83421	4.71427	4.62663	4.52544	4.64631	4.54991	4.61601	4.57755	4.68411	4.61914	4.48847	4.50216	4.62862	4.36763	4.31379	4.69733	4.58399	4.53218	4.66888	4.76264	4.61996	4.51527	4.54426	4.48777
1927.53	4.70223	4.46006	4.7385	4.54299	4.62674	4.65275	4.64989	4.62128	4.69222	4.79639	4.83528	4.82921	4.79544	4.73461	4.61611	4.76298	4.83231	4.69726	4.64071	4.53246	4.65143	4.55271	4.6229	4.57227	4.68742	4.61465	4.49416	4.50256	4.62323	4.37114	4.32161	4.712	4.59829	4.552	4.64959	4.78283	4.63002	4.52264	4.54121	4.48823
1926.04	4.71564	4.45866	4.75441	4.5562	4.63691	4.65944	4.65047	4.61889	4.6983	4.78896	4.83133	4.82085	4.80664	4.7339	4.62538	4.77099	4.81774	4.69976	4.647	4.53392	4.66142	4.54919	4.62919	4.57318	4.69055	4.61523	4.49953	4.50293	4.62045	4.3822	4.33636	4.73717	4.61489	4.57362	4.64453	4.7857	4.64756	4.53078	4.53445	4.48664
1924.56	4.72339	4.46607	4.77318	4.56796	4.65348	4.66445	4.66021	4.61611	4.70107	4.79422	4.82224	4.81203	4.82058	4.74408	4.63063	4.79499	4.81916	4.71135	4.6512	4.53152	4.66594	4.5441	4.63387	4.58023	4.68375	4.61284	4.4963	4.50659	4.62493	4.38768	4.34709	4.76035	4.61968	4.59124	4.64561	4.7789	4.67037	4.53151	4.53531	4.48621
1923.08	4.71764	4.47201	4.78872	4.57106	4.66895	4.66993	4.66202	4.60561	4.69792	4.81849	4.80992	4.81609	4.82472	4.75527	4.62398	4.80984	4.82508	4.72507	4.65171	4.52236	4.67256	4.53791	4.63313	4.5932	4.68321	4.60295	4.4969	4.50794	4.63648	4.39253	4.35677	4.76076	4.613	4.59617	4.6498	4.77057	4.68949	4.53277	4.5358	4.49254
1921.6	4.71875	4.47177	4.80418	4.5739	4.66291	4.67217	4.6526	4.59542	4.7001	4.83385	4.80091	4.82698	4.83005	4.76711	4.61028	4.81834	4.85645	4.73589	4.64517	4.51879	4.67908	4.5408	4.63282	4.60236	4.67959	4.59141	4.5047	4.50996	4.65038	4.39587	4.36671	4.75066	4.61118	4.59602	4.65946	4.77636	4.69338	4.53421	4.53446	4.49882
1920.12	4.72891	4.47114	4.81631	4.57199	4.64717	4.66649	4.63441	4.59468	4.71359	4.86667	4.80116	4.84966	4.82045	4.78306	4.59341	4.81788	4.87763	4.74814	4.64072	4.51847	4.6803	4.55137	4.63536	4.5928	4.67302	4.5899	4.51654	4.51882	4.66707	4.40423	4.37492	4.73332	4.62695	4.59768	4.67253	4.78845	4.69294	4.53592	4.5349	4.50635
1918.65	4.75851	4.47995	4.82412	4.56683	4.63392	4.66371	4.61655	4.59416	4.73211	4.8942	4.80833	4.8696	4.78974	4.78986	4.58847	4.81791	4.88801	4.76994	4.65232	4.52974	4.68125	4.5641	4.63798	4.58583	4.66492	4.59435	4.52816	4.53459	4.68344	4.41705	4.38223	4.72313	4.64398	4.60467	4.68276	4.79151	4.69185	4.53778	4.53608	4.51571
1917.18	4.79342	4.49719	4.8216	4.56595	4.63111	4.6644	4.61179	4.6057	4.74224	4.92035	4.82409	4.87203	4.77156	4.78741	4.60534	4.80778	4.89169	4.77739	4.65853	4.54248	4.68671	4.58153	4.63737	4.59655	4.66969	4.60304	4.53227	4.54855	4.69382	4.42637	4.38963	4.71907	4.66497	4.61386	4.68468	4.78068	4.68892	4.53811	4.54577	4.52137
1915.71	4.81519	4.52545	4.80547	4.57286	4.64956	4.67551	4.61736	4.62102	4.74781	4.91645	4.83685	4.86807	4.76101	4.77292	4.62261	4.79272	4.87426	4.7724	4.66664	4.55434	4.7069	4.58679	4.63593	4.61122	4.6825	4.609	4.54138	4.55927	4.7011	4.4324	4.39687	4.72323	4.67187	4.6204	4.68116	4.76967	4.68138	4.54039	4.55527	4.52534
1914.24	4.82116	4.55224	4.79638	4.58626	4.66901	4.6928	4.63425	4.64584	4.75535	4.91258	4.85045	4.86931	4.76214	4.76799	4.63936	4.77883	4.85765	4.75017	4.67306	4.56296	4.71551	4.59504	4.63796	4.62159	4.70527	4.61236	4.55298	4.56882	4.70288	4.43429	4.41106	4.73109	4.66721	4.62405	4.67086	4.78594	4.6782	4.54953	4.5715	4.5331
1912.78	4.82175	4.58117	4.79201	4.60614	4.69266	4.71079	4.6553	4.66747	4.77452	4.90464	4.87452	4.87962	4.772	4.78256	4.6478	4.77438	4.8508	4.73107	4.68485	4.57137	4.71202	4.61378	4.65265	4.63605	4.72254	4.61925	4.57848	4.57756	4.71297	4.44092	4.42997	4.74319	4.6696	4.63655	4.66879	4.82648	4.67356	4.56208	4.58844	4.54437
1911.31	4.82511	4.60501	4.80437	4.62684	4.71286	4.70901	4.67153	4.68342	4.79386	4.89648	4.89432	4.88869	4.79947	4.81629	4.66059	4.77296	4.84784	4.71495	4.70188	4.57892	4.69464	4.63307	4.67473	4.64008	4.72021	4.63444	4.60828	4.58697	4.71607	4.45272	4.45025	4.76671	4.68035	4.65316	4.67499	4.88208	4.67508	4.58124	4.60714	4.55973
1909.85	4.83671	4.62297	4.83806	4.64152	4.73573	4.70007	4.67501	4.69504	4.81621	4.904	4.91792	4.89437	4.82894	4.86861	4.66278	4.78963	4.86477	4.72635	4.71301	4.58158	4.67799	4.64682	4.68886	4.6464	4.70662	4.64677	4.6335	4.59595	4.72548	4.46528	4.47013	4.7883	4.69019	4.66537	4.68948	4.91639	4.68536	4.59499	4.62103	4.56595
1908.4	4.8452	4.63672	4.86025	4.65424	4.76697	4.69609	4.67287	4.70467	4.83906	4.92926	4.922	4.90537	4.86565	4.9173	4.66072	4.79114	4.88534	4.74338	4.72051	4.57551	4.67328	4.65418	4.69753	4.65186	4.68151	4.65422	4.65928	4.60614	4.73184	4.47729	4.4891	4.812	4.69626	4.66976	4.71214	4.93133	4.69148	4.60088	4.63447	4.56949
1906.94	4.84945	4.64432	4.87737	4.66621	4.79634	4.70147	4.6796	4.72271	4.86558	4.94296	4.9369	4.93177	4.8955	4.95052	4.66075	4.78705	4.88815	4.76398	4.7319	4.57206	4.6764	4.65548	4.69726	4.64972	4.67365	4.66088	4.67282	4.62215	4.74876	4.49459	4.5092	4.81474	4.69321	4.67482	4.74733	4.93967	4.69112	4.60535	4.64442	4.5739
1905.49	4.84972	4.65765	4.89811	4.67031	4.81648	4.72448	4.70009	4.73938	4.8938	4.96134	4.94678	4.95506	4.9273	4.96829	4.67305	4.79431	4.87116	4.78252	4.74552	4.56581	4.6796	4.66282	4.69658	4.66284	4.67924	4.6804	4.70201	4.63926	4.78121	4.51486	4.54334	4.83723	4.69609	4.68476	4.7763	4.95148	4.67991	4.61101	4.65996	4.59557
1904.04	4.84779	4.66879	4.93549	4.67494	4.84384	4.75268	4.72793	4.74812	4.9147	4.97345	4.95083	4.99044	4.95108	4.9753	4.70311	4.80472	4.85423	4.78363	4.75458	4.56355	4.6764	4.6795	4.70674	4.67679	4.69722	4.70337	4.73336	4.66058	4.81918	4.54024	4.58523	4.8705	4.70867	4.70279	4.79942	4.95843	4.67211	4.62675	4.68057	4.62288
1902.59	4.82718	4.6887	4.95275	4.67617	4.86654	4.79518	4.74971	4.75548	4.92438	4.98494	4.95916	5.04889	4.96718	4.98271	4.73215	4.81739	4.84538	4.78558	4.75786	4.56913	4.66602	4.70558	4.72646	4.68551	4.70622	4.73055	4.77673	4.67663	4.85053	4.56138	4.63034	4.90527	4.72002	4.72784	4.80943	4.95401	4.65868	4.64355	4.70239	4.65773
1901.14	4.81569	4.7177	4.98723	4.70137	4.88611	4.83614	4.77051	4.76764	4.94464	5.01295	4.97638	5.08908	4.98887	4.99561	4.75777	4.82227	4.85977	4.77689	4.76579	4.57702	4.656	4.73346	4.7582	4.68936	4.7063	4.76701	4.82139	4.69654	4.86894	4.58205	4.67169	4.92792	4.73749	4.75427	4.80859	4.96999	4.65711	4.67665	4.72279	4.68818
1899.7	4.82231	4.75619	5.00862	4.73804	4.90691	4.86636	4.78619	4.77801	4.97624	5.05012	5.00366	5.11634	5.02382	5.0088	4.78336	4.82312	4.89276	4.77608	4.78004	4.59245	4.65979	4.76252	4.79201	4.7031	4.70438	4.81336	4.87173	4.72707	4.88718	4.59756	4.70918	4.94413	4.75466	4.78128	4.82381	4.97007	4.66198	4.71731	4.73971	4.72565
1898.25	4.85911	4.79697	5.03168	4.79625	4.92756	4.88533	4.81763	4.80283	5.03839	5.09894	5.04045	5.11487	5.05562	5.03118	4.80702	4.82843	4.92367	4.78706	4.78417	4.6058	4.67453	4.79183	4.82761	4.71218	4.69333	4.86375	4.92694	4.75756	4.92135	4.6083	4.75977	4.95898	4.78624	4.81293	4.84014	4.95536	4.67993	4.76134	4.76703	4.77952
1896.81	4.90125	4.84875	5.05207	4.85721	4.96982	4.9077	4.84281	4.84	5.09405	5.15953	5.10027	5.12342	5.09408	5.05614	4.83038	4.83004	4.93049	4.8096	4.77884	4.61937	4.68985	4.83099	4.84818	4.70784	4.6792	4.91344	5.00344	4.78844	4.98609	4.62946	4.8206	4.99171	4.82255	4.83508	4.86866	4.95242	4.69744	4.80904	4.79687	4.84203
1895.38	4.92222	4.90965	5.07178	4.92027	5.02909	4.94056	4.86623	4.86868	5.17075	5.23574	5.13784	5.14219	5.12779	5.10784	4.84066	4.83577	4.92344	4.82825	4.77966	4.63285	4.6924	4.87965	4.87917	4.69662	4.66885	4.94956	5.10001	4.80704	5.06068	4.65296	4.89585	5.02092	4.86479	4.86974	4.89661	4.98442	4.71588	4.85569	4.8372	4.92393
1893.94	4.94215	5.00248	5.09858	4.9709	5.09852	4.98869	4.89118	4.87899	5.29976	5.31457	5.19906	5.15082	5.21527	5.19404	4.86104	4.83822	4.90815	4.83266	4.78676	4.64581	4.7012	4.93509	4.91068	4.68242	4.6684	5.00587	5.21168	4.8233	5.11879	4.67628	4.9996	5.07163	4.89772	4.90203	4.89754	5.03862	4.71798	4.89414	4.88979	5.00798
1892.51	4.95995	5.15641	5.17418	5.01811	5.17018	5.05068	4.91977	4.90316	5.26529	5.36602	5.26558	5.19582	5.29924	5.2905	4.87542	4.84721	4.90475	4.82362	4.81706	4.65567	4.70235	4.97436	4.92962	4.68445	4.67898	5.08983	5.37033	4.84844	5.14549	4.69904	5.11556	5.11902	4.93394	4.94821	4.89447	4.97039	4.7192	4.94366	4.96611	5.09054
1891.07	4.99352	5.33474	5.24039	5.07382	5.30536	5.11069	4.96807	4.9219	5.3912	5.33301	5.29395	5.22295	5.3906	5.46553	4.91299	4.83811	4.89169	4.82592	4.85329	4.66268	4.70805	5.01682	4.97175	4.6954	4.68644	5.18579	5.323	4.88682	5.17976	4.72017	5.28951	5.16726	4.96168	5.00462	4.91308	4.97928	4.73032	4.98475	4.99835	5.11995
1889.64	5.04549	5.55987	5.37249	5.11268	5.48152	5.0884	5.02288	4.95833	5.41163	5.37187	5.36729	5.33381	5.39069	5.66536	4.96297	4.82493	4.89609	4.84028	4.87761	4.66261	4.71291	5.075	5.03183	4.7155	4.68924	5.331	5.4566	4.96058	5.27283	4.74101	5.36723	5.17876	4.9978	5.06619	4.9405	5.04285	4.74805	5.03613	5.13073	5.26122
1888.22	4.9801	5.71146	5.5141	5.20835	5.48716	5.09187	5.05895	5.0103	5.36108	5.40531	5.39835	5.46803	5.61061	5.61394	5.01645	4.81918	4.91566	4.84502	4.90978	4.66438	4.71745	5.17024	5.06883	4.73621	4.67609	5.56374	5.54614	5.03982	5.39272	4.77115	5.41297	5.12224	5.03054	5.14803	4.95969	5.03262	4.76314	5.11656	5.23348	5.32192
1886.79	5.01844	5.59863	5.55381	5.45883	5.57649	5.17461	5.08697	5.09174	5.47712	5.42824	5.58275	5.45554	5.59606	5.56279	5.0668	4.82944	4.94789	4.84139	4.93149	4.67436	4.72056	5.27578	5.06033	4.74656	4.65914	5.55406	5.63081	5.11985	5.55432	4.80835	5.70247	5.13742	5.06247	5.10889	4.9889	5.02211	4.77602	5.21849	5.30158	5.34402
1885.37	4.97258	5.5	5.58158	5.5733	5.61945	5.3473	5.12057	5.14871	5.61316	5.50529	5.4628	5.51262	5.6052	5.66962	5.05599	4.84145	4.95783	4.82512	4.94771	4.69668	4.72232	5.35457	5.22357	4.75601	4.63971	5.71809	5.84949	5.17522	5.54556	4.85636	5.66667	5.22534	5.09399	5.15691	5.02577	5.01351	4.78896	5.33419	5.4473	5.58891
1883.95	4.94719	5.69897	5.63072	5.80546	5.68192	5.36997	5.09775	5.21847	5.70247	5.4767	5.47007	5.55139	5.64027	5.71373	5.12326	4.84631	4.94522	4.79983	4.95681	4.73023	4.72671	5.32764	5.12538	4.7722	4.63993	5.75	#DIV/0!	5.26033	5.38515	4.91515	5.69897	5.30284	5.1211	5.26572	5.08706	4.9956	4.7928	5.57543	5.61331	5.80546
1882.53	4.92445	#DIV/0!	5.79931	6	5.52288	5.37288	5.14832	5.30399	5.84949	5.51965	5.57395	5.34859	5.67959	5.84949	5.18458	4.84474	4.945	4.7948	4.97181	4.76445	4.72656	5.41392	5.19498	4.78426	4.64693	5.61092	#DIV/0!	5.32797	5.50763	4.9938	5.52288	5.37694	5.16424	5.28597	5.18301	4.99968	4.79909	5.71127	5.60174	5.84949
1881.11	4.89926	#DIV/0!	5.69897	#DIV/0!	5.89966	5.40473	5.24548	5.27257	5.68618	5.44792	5.64216	5.55926	5.69897	#DIV/0!	5.21832	4.84052	4.97142	4.78377	4.99269	4.79353	4.73833	5.44073	5.1932	4.78555	4.66333	6	#DIV/0!	5.39566	5.79931	4.94394	5.46041	5.43142	5.20065	5.39753	5.27497	4.98055	4.81761	5.64027	5.67696	5.52288
1879.7	4.86811	#DIV/0!	#DIV/0!	#DIV/0!	5.69897	5.44129	5.32998	5.34813	5.84949	5.57993	5.76144	5.5	5.72396	#DIV/0!	5.15623	4.8297	5.00723	4.79103	4.98344	4.82242	4.75613	5.46194	5.38002	4.77615	4.67874	#DIV/0!	#DIV/0!	5.54893	5.69897	4.99861	5.46041	5.54227	5.24601	5.22159	5.34795	4.95625	4.83557	6	5.68874	5.52288
1878.29	4.83708	#DIV/0!	#DIV/0!	#DIV/0!	6	5.38174	5.43822	5.44741	#DIV/0!	5.7302	5.69897	6	5.84949	#DIV/0!	5.12735	4.80204	4.97146	4.79106	5.00497	4.84495	4.78282	5.67929	5.28202	4.76822	4.69428	#DIV/0!	#DIV/0!	5.47751	6	4.97763	5.69897	5.61524	5.23943	5.21636	5.25408	4.93145	4.86518	#DIV/0!	5.79931	5.69897
1876.88	4.80224	#DIV/0!	#DIV/0!	#DIV/0!	#DIV/0!	5.39749	5.31812	5.38416	#DIV/0!	5.76144	#DIV/0!	5.52288	5.76144	#DIV/0!	5.08962	4.7746	4.92892	4.79415	4.9499	4.87144	4.80905	5.50763	5.37876	4.79858	4.69656	#DIV/0!	#DIV/0!	5.4916	#DIV/0!	4.97605	6	5.55935	5.22894	5.25749	5.26137	4.88172	4.89737	#DIV/0!	6	#DIV/0!
1875.47	4.76323	#DIV/0!	#DIV/0!	#DIV/0!	#DIV/0!	5.34861	5.28634	5.47601	#DIV/0!	5.84949	#DIV/0!	5.39794	6	#DIV/0!	5.1215	4.7629	4.82276	4.80765	4.96036	4.90321	4.83173	5.52288	5.30694	4.87914	4.69227	#DIV/0!	#DIV/0!	5.47411	#DIV/0!	5.01703	#DIV/0!	5.35249	5.25849	5.28893	5.32686	4.8237	4.90819	#DIV/0!	#DIV/0!	#DIV/0!
1874.06	4.72203	#DIV/0!	#DIV/0!	#DIV/0!	#DIV/0!	5.49647	5.33125	5.45864	#DIV/0!	5.69897	#DIV/0!	5.39794	#DIV/0!	#DIV/0!	5.19758	4.76025	4.78245	4.79554	4.92705	4.87738	4.85386	#DIV/0!	5.45188	4.85274	4.68001	#DIV/0!	#DIV/0!	5.54197	#DIV/0!	4.95646	#DIV/0!	5.41228	5.16467	5.24904	5.36817	4.77425	4.90343	#DIV/0!	#DIV/0!	#DIV/0!
1872.66	4.6927	#DIV/0!	6	#DIV/0!	#DIV/0!	5.51911	5.33779	5.54658	#DIV/0!	5.69897	#DIV/0!	5.69897	#DIV/0!	#DIV/0!	5.12573	4.75889	4.76981	4.75062	4.90294	4.90003	4.86289	6	5.52378	4.92245	4.66584	#DIV/0!	#DIV/0!	5.57526	#DIV/0!	4.97054	#DIV/0!	5.41792	5.21001	5.2544	5.37012	4.73913	4.88756	#DIV/0!	#DIV/0!	#DIV/0!
1871.26	4.66048	#DIV/0!	#DIV/0!	#DIV/0!	#DIV/0!	5.46245	5.41527	5.57859	6	5.69897	#DIV/0!	#DIV/0!	#DIV/0!	#DIV/0!	5.17423	4.7495	4.73721	4.6978	4.83329	4.90395	4.81451	6	5.45278	4.84089	4.65716	#DIV/0!	#DIV/0!	5.38089	5.52288	4.93059	#DIV/0!	5.24369	5.19604	5.29953	5.31591	4.70659	4.87453	#DIV/0!	#DIV/0!	#DIV/0!
1869.86	4.60458	#DIV/0!	#DIV/0!	#DIV/0!	#DIV/0!	5.48495	5.43949	5.42342	5.52288	5.46041	#DIV/0!	#DIV/0!	#DIV/0!	#DIV/0!	5.07807	4.72225	4.73317	4.64759	4.76442	4.90135	4.78886	5.69897	5.36166	4.82269	4.64571	#DIV/0!	#DIV/0!	5.57396	5.55926	4.85471	#DIV/0!	5.19166	5.10764	5.37889	5.17172	4.65548	4.85181	#DIV/0!	#DIV/0!	#DIV/0!
1868.46	4.53378	#DIV/0!	#DIV/0!	#DIV/0!	5.52288	5.25739	5.29279	5.30124	5.67474	5.37793	5.69897	6	5.52288	#DIV/0!	5.01314	4.65283	4.64335	4.57932	4.67804	4.87468	4.78162	5.39794	5.21136	4.86002	4.59952	#DIV/0!	6	5.37301	5.43618	4.79529	#DIV/0!	5.08979	5.00912	5.19572	4.98989	4.59445	4.80178	#DIV/0!	#DIV/0!	#DIV/0!
1867.06	4.45136	#DIV/0!	5.69897	#DIV/0!	5.53993	5.00497	4.99385	5.08115	5.18059	5.23385	5.17217	5.44776	5.55926	5.57993	4.92588	4.55515	4.53683	4.48106	4.56233	4.79631	4.65241	5.65495	4.92648	4.77128	4.51522	#DIV/0!	5.44897	5.04677	5.4199	4.63465	5.61092	5.00963	4.9182	4.92235	4.81132	4.50561	4.69045	#DIV/0!	5.69897	#DIV/0!
1865.67	4.35143	5.76144	5.47926	6	5.30471	4.90929	4.75643	4.79923	5.10334	4.96518	5.14381	5.14216	5.21941	5.14494	4.69511	4.43373	4.41842	4.36281	4.43064	4.6858	4.51985	5.26716	4.91686	4.6071	4.39885	#DIV/0!	5.26573	4.75704	5.27614	4.48908	5.25614	4.74143	4.70192	4.86968	4.63698	4.40415	4.55316	#DIV/0!	5.42848	6
1864.28	4.24144	5.33746	5.00718	5.30503	5.02324	4.59109	4.54357	4.57241	4.7006	4.63974	4.70752	4.73776	4.8384	4.74709	4.50649	4.30148	4.29536	4.23988	4.29544	4.53429	4.37616	4.89594	4.59917	4.43816	4.27361	5.45972	4.86384	4.53257	4.87578	4.35413	5.00199	4.59931	4.51171	4.58856	4.46852	4.29201	4.40753	5.18519	5.11422	5.37389
1862.89	4.12695	4.90983	4.62585	4.78472	4.58221	4.37926	4.35689	4.37629	4.44977	4.4148	4.44611	4.45426	4.52957	4.46219	4.33226	4.17141	4.16914	4.11649	4.15987	4.41351	4.23414	4.55277	4.37586	4.27293	4.14869	4.9039	4.51213	4.34215	4.59808	4.22268	4.63786	4.38353	4.33702	4.3885	4.30684	4.17251	4.26406	4.84924	4.62854	4.90858
1861.5	4.01149	4.48436	4.35223	4.45111	4.31679	4.19931	4.18508	4.20129	4.24517	4.23072	4.23885	4.24561	4.30085	4.24689	4.17099	4.04316	4.04297	3.99591	4.02756	4.22974	4.09357	4.31674	4.18756	4.12222	4.02273	4.48027	4.26796	4.17009	4.33111	4.09363	4.52245	4.20201	4.17323	4.21565	4.14908	4.05221	4.127	4.48772	4.35747	4.48874
1860.12	3.89869	4.22753	4.14345	4.20352	4.11475	4.03867	4.03025	4.04238	4.06797	4.06583	4.06511	4.06868	4.11376	4.06621	4.0229	3.919	3.92238	3.88013	3.90173	4.06744	3.96079	4.12469	4.02325	3.98437	3.90119	4.22536	4.07404	4.01355	4.12419	3.96834	4.2275	4.04179	4.02006	4.05648	4.00373	3.93537	3.99441	4.2167	4.14942	4.22265
1858.74	3.78957	4.03133	3.97214	4.01137	3.94656	3.89426	3.89156	3.90116	3.91332	3.91869	3.91462	3.91404	3.95538	3.91355	3.88808	3.80221	3.81099	3.77062	3.78586	3.92501	3.83797	3.95794	3.87922	3.85847	3.78657	4.03107	3.91482	3.87373	3.95588	3.8512	4.02575	3.90034	3.88251	3.91127	3.87037	3.82566	3.86872	4.01616	3.97675	4.02553
1857.36	3.68838	3.87396	3.82837	3.85114	3.80506	3.76731	3.76898	3.77534	3.7785	3.78836	3.78448	3.78058	3.81889	3.7813	3.76825	3.69596	3.70884	3.66921	3.67986	3.80006	3.72711	3.81581	3.75326	3.74438	3.68129	3.8742	3.77948	3.75107	3.81641	3.74536	3.86794	3.77489	3.76123	3.78252	3.75149	3.72499	3.75506	3.85566	3.83193	3.8685
1855.98	3.59461	3.74187	3.70312	3.71537	3.68251	3.65592	3.65807	3.66259	3.66085	3.67186	3.6688	3.66319	3.6992	3.66542	3.66232	3.59932	3.6131	3.57491	3.58296	3.68723	3.62626	3.69219	3.64216	3.64039	3.58479	3.74201	3.66149	3.64101	3.69623	3.64867	3.73725	3.66175	3.65292	3.66869	3.64502	3.63143	3.65206	3.72137	3.70668	3.73685
1854.6	3.50858	3.62682	3.59265	3.59741	3.57362	3.55611	3.55769	3.56087	3.55635	3.56952	3.56451	3.55927	3.59185	3.56139	3.56614	3.51047	3.5234	3.4874	3.49344	3.58437	3.53292	3.58261	3.54179	3.5446	3.49503	3.62604	3.55595	3.54187	3.59009	3.55967	3.62309	3.5589	3.55523	3.56674	3.54772	3.54336	3.559	3.60419	3.59581	3.62214
1853.22	3.43093	3.52645	3.49513	3.49536	3.47741	3.46746	3.4683	3.47112	3.46408	3.47908	3.47172	3.467	3.49615	3.46859	3.47875	3.42935	3.4417	3.40815	3.41185	3.49246	3.44798	3.48631	3.45131	3.45729	3.41275	3.52381	3.46254	3.45297	3.49632	3.47898	3.52335	3.46662	3.46756	3.47672	3.46014	3.46272	3.47519	3.50123	3.49823	3.52095
1851.85	3.36263	3.44028	3.41166	3.40843	3.39433	3.38973	3.3902	3.39322	3.38287	3.39972	3.39012	3.38583	3.41272	3.38672	3.40151	3.35778	3.36925	3.33838	3.33888	3.4117	3.37279	3.40332	3.37166	3.38058	3.33941	3.43569	3.38159	3.37475	3.4143	3.40679	3.43722	3.38661	3.38992	3.39841	3.38289	3.39106	3.40053	3.4127	3.4141	3.43413
1850.48	3.3013	3.36573	3.33896	3.33293	3.32211	3.32074	3.32193	3.32451	3.31157	3.33006	3.3181	3.31435	3.33972	3.31446	3.33292	3.29409	3.30489	3.27648	3.27357	3.34089	3.30575	3.33077	3.30142	3.31277	3.27436	3.35887	3.31107	3.30546	3.34162	3.34269	3.3625	3.31665	3.32062	3.32843	3.31436	3.32702	3.33334	3.33594	3.34062	3.35843
1849.11	3.2437	3.29822	3.2735	3.26501	3.25658	3.25744	3.25874	3.26129	3.24662	3.26626	3.25307	3.24946	3.2742	3.24898	3.27017	3.23551	3.24526	3.21885	3.21329	3.27618	3.24442	3.26465	3.2374	3.25068	3.21475	3.28955	3.24688	3.24204	3.27525	3.28267	3.29501	3.25237	3.25654	3.26375	3.25099	3.26713	3.27118	3.26693	3.27374	3.29007
1847.75	3.18953	3.23594	3.2132	3.20247	3.19575	3.19844	3.1999	3.20237	3.18722	3.20794	3.19386	3.19063	3.21442	3.1889	3.21225	3.18065	3.18959	3.1646	3.15733	3.21601	3.18784	3.20342	3.17848	3.19282	3.15954	3.22596	3.18721	3.18343	3.21383	3.22614	3.2325	3.19265	3.19671	3.20369	3.19216	3.21117	3.213	3.20371	3.21233	3.22719
1846.38	3.14101	3.18061	3.15929	3.1473	3.1416	3.14615	3.1476	3.15011	3.13471	3.15599	3.14186	3.13855	3.16137	3.13581	3.16025	3.13146	3.13995	3.11615	3.10768	3.16204	3.13742	3.14889	3.1259	3.14116	3.1105	3.16968	3.1339	3.13226	3.15953	3.17569	3.17738	3.13942	3.14428	3.15046	3.13991	3.16173	3.16119	3.14733	3.1579	3.17149
1845.02	3.09915	3.13315	3.11297	3.09985	3.09504	3.10155	3.1031	3.10588	3.08949	3.11135	3.09707	3.09346	3.11557	3.08989	3.11507	3.08884	3.09746	3.0745	3.06514	3.11554	3.09394	3.10256	3.08073	3.09626	3.06819	3.12167	3.08844	3.08854	3.11321	3.13281	3.13025	3.09406	3.09973	3.10512	3.09543	3.11953	3.11685	3.09894	3.11145	3.12382
1843.66	3.06232	3.09163	3.07272	3.05852	3.05461	3.06254	3.0644	3.06713	3.04961	3.07223	3.05786	3.05382	3.07509	3.04964	3.07545	3.05093	3.0599	3.03794	3.02777	3.07462	3.05547	3.06236	3.04084	3.05656	3.03115	3.0803	3.04871	3.05014	3.07283	3.09519	3.08947	3.05446	3.06048	3.0656	3.05636	3.08212	3.07778	3.05675	3.07062	3.08228
1842.3	3.02815	3.05367	3.03591	3.02078	3.01802	3.02672	3.02878	3.03152	3.01327	3.03656	3.02216	3.01786	3.03818	3.01319	3.03921	3.01583	3.02523	3.00411	2.99342	3.03721	3.02027	3.02574	3.00435	3.02035	2.99686	3.04253	3.01222	3.01448	3.036	3.06007	3.05204	3.01831	3.0242	3.02953	3.02034	3.04709	3.04201	3.01859	3.03327	3.04445
1840.94	2.99665	3.01919	3.00225	2.9865	2.98488	2.99368	2.99604	2.99866	2.98019	3.00401	2.98921	2.98501	3.00434	2.98015	3.00614	2.98342	2.99318	2.97276	2.96182	3.0032	2.98802	2.99209	2.97104	2.9873	2.96508	3.00804	2.97851	2.98151	3.00235	3.02711	3.01761	2.98525	2.99065	2.99624	2.98716	3.01451	3.00933	2.98379	2.99935	3.00987
1839.59	2.96863	2.98858	2.97243	2.95629	2.95554	2.96419	2.96685	2.96948	2.95067	2.97505	2.95968	2.95577	2.97421	2.9508	2.9769	2.9546	2.96478	2.94459	2.93346	2.97305	2.95924	2.96209	2.94164	2.95822	2.93643	2.97733	2.94848	2.95221	2.97215	2.99691	2.98688	2.95606	2.96069	2.96651	2.95748	2.9854	2.98011	2.95311	2.9692	2.97923
1838.24	2.94401	2.96152	2.94614	2.9297	2.92953	2.93832	2.94109	2.9437	2.92467	2.94922	2.93335	2.92997	2.94758	2.9247	2.95095	2.92923	2.93964	2.91931	2.90817	2.94647	2.93363	2.93568	2.91584	2.93255	2.91121	2.95037	2.92213	2.92646	2.9455	2.97019	2.95971	2.93018	2.93411	2.94011	2.93122	2.95983	2.95405	2.92618	2.94259	2.95217
1836.88	2.92182	2.93727	2.92277	2.90596	2.9061	2.91529	2.91815	2.92041	2.90146	2.92603	2.91003	2.90697	2.92396	2.90133	2.928	2.90652	2.91693	2.89666	2.88526	2.92271	2.91059	2.91221	2.89278	2.90953	2.88867	2.92614	2.89875	2.90344	2.92175	2.9463	2.93541	2.90703	2.91033	2.91642	2.90773	2.93676	2.93041	2.90217	2.91861	2.92784
1835.54	2.90202	2.91556	2.90215	2.88461	2.88541	2.89494	2.89787	2.8995	2.88111	2.90539	2.88944	2.88672	2.90319	2.88046	2.90766	2.88648	2.89664	2.87638	2.86478	2.9015	2.89002	2.89133	2.87228	2.88904	2.86892	2.90454	2.87793	2.88297	2.90057	2.92509	2.91365	2.8863	2.88937	2.89543	2.88679	2.91625	2.90915	2.88099	2.89721	2.90624
1834.19	2.88478	2.89685	2.88409	2.86579	2.86733	2.87718	2.88006	2.8811	2.86348	2.88724	2.87147	2.86903	2.88514	2.86219	2.8899	2.86908	2.87893	2.85881	2.84692	2.88293	2.87205	2.87314	2.85439	2.87107	2.85181	2.88587	2.85962	2.865	2.88218	2.90654	2.89451	2.86811	2.87128	2.87721	2.86851	2.89834	2.89079	2.86253	2.87863	2.88754
1832.84	2.86972	2.88057	2.86812	2.84942	2.85133	2.86177	2.86437	2.86512	2.84808	2.87144	2.85593	2.85345	2.86925	2.84636	2.87407	2.85367	2.86344	2.84346	2.83153	2.86658	2.85635	2.8571	2.83862	2.85534	2.83673	2.8698	2.84347	2.84931	2.86616	2.89025	2.87774	2.85205	2.85543	2.86113	2.85262	2.8827	2.87487	2.84619	2.86239	2.87117
1831.5	2.85616	2.86606	2.85389	2.83486	2.83693	2.84771	2.85015	2.85087	2.83418	2.85744	2.84214	2.83952	2.85508	2.8323	2.85988	2.83958	2.84956	2.82973	2.81797	2.8519	2.84239	2.84278	2.82446	2.84106	2.82307	2.85563	2.82908	2.83539	2.85195	2.87569	2.86286	2.83747	2.84102	2.84664	2.83842	2.86865	2.86093	2.83159	2.84811	2.85661
1830.16	2.84409	2.85308	2.84116	2.82202	2.82401	2.83505	2.83739	2.83818	2.82148	2.84521	2.82994	2.82719	2.84235	2.81992	2.84713	2.8267	2.83725	2.81749	2.80579	2.83864	2.82999	2.82989	2.81191	2.82809	2.81086	2.84284	2.81632	2.82291	2.83932	2.86261	2.84983	2.82455	2.8279	2.83362	2.82568	2.856	2.8486	2.81852	2.83542	2.84342
1828.82	2.83342	2.84168	2.83009	2.81085	2.81259	2.82382	2.82616	2.82687	2.81026	2.83454	2.81934	2.81627	2.83118	2.8092	2.83579	2.81539	2.82651	2.80671	2.79495	2.82707	2.81918	2.81852	2.80099	2.81666	2.80006	2.83152	2.80523	2.81201	2.82823	2.85106	2.83857	2.81346	2.8163	2.82215	2.81439	2.84484	2.83761	2.80712	2.82436	2.83196
1827.49	2.82416	2.83175	2.82054	2.80111	2.80269	2.81408	2.81651	2.81701	2.80039	2.82525	2.81004	2.80687	2.82145	2.79986	2.82601	2.80564	2.81704	2.79728	2.7854	2.81703	2.80979	2.80865	2.79144	2.80667	2.79066	2.82147	2.7955	2.80243	2.81846	2.84086	2.8286	2.80396	2.80629	2.81202	2.80446	2.83528	2.82786	2.79725	2.81468	2.82196
1826.15	2.81604	2.82309	2.81228	2.79254	2.79425	2.80573	2.80819	2.80851	2.79185	2.81706	2.80181	2.79874	2.81308	2.79164	2.81758	2.79729	2.80864	2.78895	2.77713	2.80846	2.80159	2.80008	2.78307	2.79827	2.78255	2.81272	2.78705	2.7941	2.80981	2.83181	2.81975	2.7959	2.79765	2.80321	2.79578	2.82699	2.81943	2.78883	2.80613	2.81334
1824.82	2.80903	2.81572	2.80515	2.78513	2.78715	2.7986	2.80125	2.8014	2.78451	2.80979	2.79469	2.79192	2.80597	2.78446	2.81048	2.79028	2.80134	2.78175	2.76999	2.80112	2.79465	2.79295	2.77583	2.79121	2.77559	2.80521	2.77978	2.78683	2.80236	2.82406	2.81204	2.7889	2.79026	2.79571	2.78826	2.81972	2.81231	2.78143	2.79873	2.80583
1823.49	2.80306	2.80946	2.79896	2.77888	2.78137	2.79261	2.79547	2.79541	2.77827	2.80365	2.78855	2.78613	2.79989	2.77835	2.8043	2.78428	2.79507	2.77557	2.76394	2.79469	2.78878	2.78701	2.76974	2.7853	2.76981	2.79901	2.77366	2.78071	2.79595	2.81745	2.80554	2.7829	2.78397	2.78934	2.78182	2.81334	2.80649	2.77494	2.79238	2.79946
1822.16	2.79791	2.80416	2.79364	2.77359	2.77649	2.78742	2.79042	2.79031	2.77295	2.79844	2.78333	2.78111	2.79465	2.77298	2.79883	2.77922	2.78972	2.77033	2.75868	2.78917	2.78397	2.782	2.76465	2.7802	2.76497	2.79363	2.7684	2.77538	2.79031	2.81189	2.80007	2.77746	2.77843	2.78399	2.77633	2.80765	2.80155	2.76939	2.78706	2.79389
1820.83	2.79343	2.79943	2.78914	2.76928	2.77227	2.78302	2.78606	2.78577	2.76856	2.79423	2.77882	2.77681	2.79009	2.76833	2.79415	2.77464	2.78525	2.76609	2.75415	2.78444	2.77996	2.77772	2.76033	2.77581	2.76095	2.78904	2.76386	2.77074	2.78552	2.80702	2.79546	2.77263	2.77356	2.77937	2.77165	2.80276	2.79732	2.76477	2.7826	2.78928
1819.51	2.78971	2.79551	2.78556	2.76566	2.76884	2.77953	2.78245	2.78199	2.76509	2.79091	2.77511	2.77319	2.78638	2.76427	2.79049	2.77081	2.78166	2.76282	2.75037	2.78067	2.77662	2.77416	2.75669	2.77206	2.7577	2.78525	2.7601	2.76699	2.78168	2.80277	2.79162	2.76854	2.76949	2.77546	2.76789	2.7988	2.79375	2.76122	2.77894	2.78535
1818.18	2.78679	2.79242	2.7828	2.7628	2.76611	2.77692	2.77958	2.7791	2.76227	2.78832	2.77223	2.77037	2.78345	2.76108	2.78759	2.76783	2.77887	2.76024	2.74736	2.7778	2.77387	2.77125	2.75368	2.76903	2.75519	2.78218	2.75702	2.76411	2.7787	2.79933	2.78858	2.76538	2.76619	2.77231	2.76492	2.79583	2.79081	2.75844	2.77606	2.78226
1816.86	2.78457	2.79009	2.78072	2.76048	2.76408	2.77484	2.77732	2.77685	2.76001	2.78638	2.77024	2.76831	2.78113	2.75867	2.78526	2.76553	2.77661	2.7579	2.74497	2.77564	2.77168	2.76887	2.75135	2.76668	2.75326	2.77981	2.75463	2.76199	2.77638	2.79657	2.78605	2.76297	2.76355	2.76988	2.76259	2.79357	2.78846	2.75623	2.77368	2.77981
1815.54	2.78299	2.78833	2.77904	2.75875	2.76269	2.77332	2.77553	2.77534	2.75815	2.78477	2.7689	2.7668	2.77938	2.75702	2.78332	2.76381	2.77498	2.75593	2.74298	2.77393	2.77004	2.76699	2.74974	2.76498	2.75189	2.77809	2.75279	2.76032	2.77455	2.79446	2.78406	2.76114	2.76139	2.76815	2.76084	2.79184	2.78667	2.75454	2.77181	2.77788
1814.22	2.7819	2.78703	2.77776	2.75753	2.7617	2.77218	2.77428	2.77436	2.75682	2.78365	2.76812	2.76579	2.77819	2.75591	2.78192	2.76262	2.77362	2.75449	2.74161	2.77254	2.76901	2.76566	2.74873	2.76371	2.751	2.777	2.75142	2.75915	2.7732	2.79293	2.78258	2.75983	2.75981	2.76679	2.75953	2.79057	2.78538	2.75333	2.77032	2.77644
1812.91	2.78129	2.78618	2.77685	2.75669	2.76119	2.77153	2.77363	2.77372	2.75605	2.78298	2.76764	2.76511	2.77749	2.7552	2.78108	2.76191	2.7727	2.75374	2.74079	2.77158	2.76851	2.76496	2.74825	2.76298	2.75049	2.77628	2.75051	2.75835	2.77231	2.79189	2.78167	2.75904	2.75884	2.7659	2.75865	2.78972	2.78468	2.75251	2.76944	2.77542
1811.59	2.78108	2.78577	2.77636	2.7564	2.76102	2.77122	2.77342	2.77333	2.75578	2.78293	2.76735	2.76477	2.77718	2.75477	2.78059	2.76168	2.77214	2.75352	2.74054	2.77111	2.76844	2.76469	2.74803	2.76273	2.75039	2.77587	2.75009	2.75802	2.77188	2.79132	2.78118	2.75876	2.75842	2.76526	2.75808	2.78927	2.78445	2.75197	2.7691	2.77484
1810.28	2.78119	2.78556	2.7764	2.7565	2.76112	2.7713	2.77358	2.77321	2.75593	2.78323	2.76735	2.76483	2.77719	2.75472	2.78041	2.76162	2.77204	2.75358	2.74072	2.77102	2.76871	2.76477	2.74804	2.76281	2.75082	2.7757	2.74998	2.75806	2.7718	2.79101	2.781	2.75894	2.75831	2.76489	2.7578	2.78916	2.78449	2.75189	2.76918	2.77471
1808.97	2.78134	2.78551	2.77668	2.75685	2.76147	2.77159	2.77398	2.77337	2.75629	2.78359	2.76774	2.76532	2.77737	2.75491	2.78036	2.76166	2.77225	2.75378	2.74114	2.77121	2.76919	2.76509	2.74823	2.76313	2.75161	2.77586	2.75024	2.75841	2.77204	2.79103	2.7811	2.75939	2.75833	2.76498	2.7578	2.78927	2.78481	2.75205	2.76957	2.77494
1807.66	2.7816	2.7857	2.77729	2.75739	2.76192	2.77207	2.77439	2.77392	2.7567	2.78403	2.76846	2.76613	2.7778	2.75528	2.78061	2.76178	2.7727	2.75408	2.7416	2.7715	2.76982	2.76565	2.74854	2.76364	2.75254	2.77635	2.75082	2.759	2.77237	2.79119	2.78134	2.75991	2.75848	2.76528	2.75793	2.78953	2.78528	2.75256	2.77013	2.7753
1806.36	2.7821	2.78616	2.77808	2.75814	2.7625	2.77268	2.77496	2.77459	2.7572	2.78457	2.76939	2.76708	2.77829	2.75588	2.78099	2.76208	2.77326	2.75447	2.74201	2.77189	2.77056	2.76636	2.74916	2.76431	2.75356	2.77693	2.75164	2.75963	2.77275	2.79161	2.78183	2.76028	2.75872	2.76584	2.75826	2.79001	2.78595	2.75325	2.77079	2.77566
1805.05	2.78284	2.78688	2.7791	2.75895	2.76318	2.77347	2.77567	2.77525	2.75784	2.7852	2.77025	2.76789	2.77895	2.75675	2.78143	2.76253	2.77384	2.7551	2.74256	2.77238	2.77134	2.76713	2.75005	2.7651	2.75467	2.77766	2.75263	2.76028	2.77316	2.79203	2.78238	2.76058	2.75906	2.76641	2.75871	2.79055	2.78679	2.75405	2.77153	2.77609
1803.75	2.78372	2.78763	2.78004	2.75986	2.76389	2.77432	2.77652	2.7758	2.75853	2.786	2.77096	2.76858	2.77973	2.75763	2.78189	2.763	2.77445	2.75575	2.74317	2.77281	2.77221	2.76784	2.75106	2.76586	2.75573	2.77827	2.75343	2.76098	2.7737	2.79242	2.783	2.76101	2.75943	2.76676	2.75914	2.79108	2.78766	2.75489	2.7723	2.77671
1802.45	2.78451	2.78825	2.78071	2.76053	2.7646	2.77506	2.77737	2.77624	2.75911	2.78695	2.77167	2.76927	2.78039	2.75826	2.78236	2.76333	2.775	2.75632	2.74359	2.7733	2.77315	2.76854	2.75195	2.76644	2.75671	2.77881	2.75399	2.76167	2.77419	2.79274	2.78365	2.76142	2.7597	2.767	2.75956	2.7916	2.78844	2.75576	2.77301	2.77745
1801.15	2.78507	2.7886	2.78118	2.76099	2.7651	2.77569	2.77812	2.7767	2.75935	2.78782	2.77231	2.76996	2.78089	2.75853	2.7827	2.76347	2.77541	2.75674	2.74379	2.77374	2.77394	2.76924	2.75259	2.76682	2.75739	2.77923	2.75432	2.7623	2.77454	2.79277	2.78414	2.76179	2.75996	2.76699	2.75985	2.79193	2.7891	2.75659	2.77358	2.77818
1799.86	2.78524	2.78876	2.78137	2.76124	2.76555	2.77609	2.77851	2.77694	2.75928	2.78833	2.77295	2.7705	2.78115	2.75854	2.78286	2.76347	2.77551	2.75693	2.74371	2.77414	2.77444	2.76975	2.75292	2.76695	2.75776	2.77967	2.75453	2.76265	2.77467	2.79268	2.78432	2.76188	2.76001	2.76694	2.75994	2.79198	2.7897	2.7571	2.77397	2.7787
1798.56	2.78502	2.78868	2.78137	2.76126	2.76573	2.77619	2.77841	2.77697	2.75897	2.78856	2.77326	2.77071	2.78102	2.75834	2.7827	2.76334	2.77533	2.75698	2.74336	2.77435	2.77457	2.76998	2.7529	2.76689	2.75773	2.77997	2.75452	2.76278	2.77456	2.79236	2.78417	2.76168	2.75974	2.76671	2.75962	2.79171	2.78994	2.75715	2.77407	2.77876
1797.27	2.7845	2.78822	2.78101	2.76098	2.76554	2.77587	2.77795	2.77661	2.75843	2.78827	2.77308	2.77039	2.78061	2.7579	2.78211	2.76306	2.77468	2.7566	2.74295	2.77403	2.77426	2.76973	2.75252	2.76652	2.75729	2.77987	2.75422	2.76249	2.77421	2.79171	2.78355	2.76128	2.75903	2.76636	2.75881	2.79095	2.7897	2.75674	2.77371	2.77827
1795.98	2.78351	2.78732	2.78022	2.76021	2.76476	2.77511	2.7771	2.7757	2.75766	2.78748	2.77223	2.76964	2.77982	2.757	2.78117	2.7624	2.77357	2.75576	2.74221	2.77314	2.77367	2.76895	2.75193	2.76574	2.75648	2.77932	2.75357	2.76174	2.77349	2.7905	2.78241	2.76044	2.75779	2.76547	2.75757	2.78979	2.7887	2.7559	2.7728	2.77719
1794.69	2.78189	2.78586	2.77901	2.7589	2.76342	2.77382	2.77584	2.77428	2.7565	2.78605	2.77086	2.76843	2.7786	2.75561	2.77972	2.76099	2.77189	2.75416	2.74097	2.77161	2.7727	2.76765	2.75086	2.76459	2.75538	2.77817	2.75234	2.76047	2.77209	2.7886	2.78075	2.75914	2.75593	2.76379	2.75599	2.78818	2.78706	2.75467	2.7714	2.77566
1793.4	2.77969	2.78384	2.77722	2.75693	2.76154	2.77189	2.77398	2.77236	2.75469	2.78421	2.76902	2.76657	2.77679	2.75364	2.7777	2.75891	2.76975	2.7518	2.73907	2.76954	2.77112	2.76572	2.7493	2.76272	2.75375	2.7765	2.75053	2.75875	2.77008	2.78621	2.77852	2.7572	2.75355	2.7614	2.7539	2.78595	2.78498	2.75293	2.76962	2.7737
1792.11	2.77686	2.78115	2.77491	2.75432	2.75908	2.76921	2.77144	2.76981	2.7521	2.78181	2.76663	2.76419	2.77445	2.75107	2.77498	2.75614	2.76707	2.74878	2.73636	2.76705	2.76879	2.76318	2.74713	2.76021	2.75146	2.77417	2.7481	2.7565	2.76754	2.78331	2.77575	2.7546	2.75064	2.75844	2.75126	2.783	2.78243	2.75067	2.76739	2.7712
1790.83	2.77344	2.7779	2.77187	2.75102	2.75603	2.76589	2.76819	2.7666	2.74878	2.77869	2.76347	2.76105	2.77143	2.74776	2.77162	2.75264	2.76375	2.7453	2.73292	2.76395	2.76567	2.76006	2.7442	2.75696	2.74842	2.77118	2.74494	2.75351	2.7644	2.77979	2.77241	2.75126	2.74708	2.75493	2.7479	2.77932	2.77941	2.74771	2.76444	2.76792
1789.55	2.76929	2.77383	2.76813	2.74705	2.75222	2.76195	2.76432	2.76264	2.74481	2.77488	2.75944	2.75717	2.76768	2.74373	2.76745	2.74832	2.75973	2.74121	2.72868	2.75999	2.76178	2.75629	2.74041	2.75297	2.74459	2.76724	2.74094	2.74966	2.76051	2.77537	2.76831	2.74721	2.74283	2.75074	2.74385	2.77479	2.77554	2.74387	2.76062	2.76382
1788.27	2.76418	2.76893	2.76346	2.74225	2.74759	2.75726	2.7596	2.75774	2.73998	2.7702	2.75463	2.75249	2.763	2.73878	2.76242	2.74317	2.75481	2.73644	2.72367	2.75504	2.7571	2.75176	2.73568	2.74803	2.73988	2.76238	2.73608	2.74483	2.75569	2.77	2.76335	2.74234	2.73765	2.74564	2.73893	2.76958	2.77074	2.7391	2.75585	2.75878
1786.99	2.75811	2.76307	2.75779	2.73647	2.74201	2.75181	2.75397	2.75197	2.73441	2.76478	2.74899	2.74693	2.7573	2.73291	2.75643	2.73716	2.74894	2.73083	2.71783	2.74902	2.7515	2.74634	2.73002	2.74221	2.73441	2.75667	2.73025	2.73907	2.74995	2.7636	2.75755	2.73657	2.73151	2.73946	2.73299	2.76355	2.76493	2.73341	2.75023	2.75282
1785.71	2.75108	2.75617	2.75109	2.72974	2.73542	2.74537	2.7474	2.74522	2.72798	2.75846	2.74269	2.74038	2.75049	2.72615	2.74951	2.73029	2.74199	2.72434	2.71111	2.74205	2.74507	2.73987	2.72335	2.7354	2.72813	2.75006	2.72356	2.73246	2.74329	2.75633	2.75078	2.72995	2.72441	2.73237	2.72618	2.75662	2.75812	2.72688	2.74365	2.7459
1784.44	2.74326	2.74839	2.74356	2.72206	2.7278	2.73791	2.73982	2.7376	2.7205	2.75123	2.73543	2.73295	2.74259	2.71851	2.74169	2.72248	2.73403	2.7168	2.70335	2.73415	2.73763	2.73245	2.71575	2.72767	2.72083	2.74248	2.71585	2.72502	2.7357	2.74819	2.74295	2.72237	2.71636	2.72439	2.71843	2.74869	2.75045	2.71947	2.73602	2.73803
1783.17	2.73447	2.73968	2.73515	2.71352	2.71933	2.72922	2.73136	2.72903	2.71202	2.743	2.72712	2.7245	2.73365	2.70999	2.73288	2.71372	2.72517	2.7082	2.69458	2.72537	2.72929	2.72402	2.70723	2.71914	2.71243	2.73405	2.70731	2.71673	2.72714	2.73911	2.73401	2.71389	2.70756	2.71546	2.7097	2.73973	2.74195	2.71121	2.72744	2.72927
1781.9	2.72474	2.72995	2.72581	2.70405	2.70988	2.71946	2.72184	2.71945	2.70245	2.73368	2.71768	2.71511	2.72391	2.70033	2.72301	2.70394	2.71537	2.69854	2.68465	2.71583	2.71991	2.71454	2.69788	2.70967	2.70288	2.72468	2.6978	2.70741	2.7176	2.72912	2.72411	2.70439	2.69793	2.70567	2.69995	2.72987	2.7325	2.70197	2.7179	2.7197
1780.63	2.71402	2.71913	2.7155	2.69369	2.6994	2.7089	2.71121	2.70884	2.69198	2.72329	2.70728	2.70483	2.71335	2.68966	2.71218	2.69311	2.70462	2.6879	2.67387	2.70525	2.70944	2.70399	2.68752	2.69929	2.69222	2.71441	2.6873	2.69705	2.70701	2.71812	2.71315	2.69385	2.68736	2.69508	2.68929	2.71901	2.7219	2.69166	2.70741	2.70924
1779.36	2.70242	2.70731	2.70415	2.6824	2.68779	2.69755	2.6995	2.69719	2.68051	2.71184	2.69597	2.69357	2.70196	2.67803	2.70044	2.68133	2.69291	2.67629	2.66212	2.69368	2.69775	2.69246	2.67616	2.68778	2.68066	2.70312	2.67578	2.68553	2.69537	2.70617	2.70118	2.6823	2.6758	2.68355	2.67775	2.70721	2.71026	2.68028	2.69586	2.69779
1778.09	2.68988	2.69468	2.69182	2.67003	2.67514	2.68536	2.68687	2.68447	2.66818	2.69948	2.68376	2.68132	2.68952	2.66569	2.68787	2.66867	2.68025	2.66382	2.64966	2.68106	2.68495	2.68016	2.66377	2.6752	2.66828	2.69078	2.66331	2.67292	2.68278	2.69316	2.6883	2.66982	2.66303	2.67103	2.66525	2.69426	2.69763	2.66793	2.6834	2.68527
1776.83	2.67632	2.68117	2.67841	2.6566	2.66163	2.67213	2.67333	2.67078	2.65472	2.6862	2.67045	2.66794	2.67615	2.65247	2.67448	2.65504	2.66666	2.65042	2.63626	2.66754	2.67131	2.66688	2.6504	2.66166	2.65502	2.67738	2.64995	2.65944	2.66929	2.67921	2.67449	2.65642	2.64935	2.65746	2.65177	2.68034	2.68403	2.6546	2.67001	2.67159
1775.57	2.66177	2.66663	2.66407	2.64221	2.64734	2.65776	2.65902	2.65609	2.64036	2.67197	2.65606	2.6537	2.66181	2.6382	2.66015	2.64058	2.65226	2.63609	2.62192	2.65314	2.65697	2.65266	2.6362	2.64715	2.64077	2.66297	2.63568	2.64508	2.65488	2.66434	2.65972	2.64209	2.63467	2.64292	2.63721	2.66539	2.66939	2.64036	2.65579	2.65692
1774.31	2.64631	2.65103	2.64881	2.62679	2.63226	2.6424	2.6439	2.64059	2.62509	2.65688	2.64071	2.63855	2.64652	2.62287	2.6449	2.6253	2.63708	2.6209	2.60662	2.63789	2.64186	2.63733	2.62115	2.63187	2.62563	2.64766	2.62043	2.62994	2.63961	2.64855	2.64403	2.62685	2.61919	2.62748	2.62165	2.64961	2.65371	2.62517	2.64065	2.64123
1773.05	2.63012	2.63443	2.63269	2.61047	2.61628	2.62615	2.62789	2.6243	2.609	2.64101	2.6246	2.62261	2.63039	2.60664	2.62874	2.60915	2.62094	2.60476	2.59045	2.6217	2.62581	2.62109	2.60521	2.6158	2.60963	2.63151	2.60424	2.61398	2.62344	2.63185	2.62744	2.61071	2.60289	2.61116	2.60531	2.633	2.63713	2.60916	2.62455	2.62475
1771.79	2.61319	2.61696	2.61584	2.59347	2.59934	2.6091	2.61097	2.60717	2.59212	2.62426	2.60785	2.60597	2.61339	2.5897	2.61171	2.5921	2.60394	2.58789	2.57349	2.60465	2.60891	2.60401	2.58842	2.59898	2.59285	2.61459	2.58713	2.59717	2.60647	2.61427	2.61003	2.59375	2.58588	2.59402	2.58823	2.61552	2.6198	2.59238	2.60757	2.6075
1770.54	2.59554	2.59881	2.59831	2.57584	2.5816	2.59138	2.59321	2.58935	2.57455	2.6068	2.59044	2.58861	2.5956	2.57212	2.59384	2.57417	2.58619	2.57029	2.55582	2.58673	2.5912	2.58636	2.57096	2.58134	2.57524	2.59703	2.56931	2.57975	2.58872	2.59595	2.59204	2.57614	2.56808	2.57619	2.57051	2.59727	2.60186	2.57482	2.58983	2.58961
1769.29	2.57716	2.58009	2.5802	2.55769	2.56317	2.5731	2.5748	2.57079	2.55639	2.5887	2.57227	2.57051	2.57711	2.55396	2.57528	2.55554	2.56781	2.55202	2.53746	2.56816	2.57281	2.56817	2.55291	2.56284	2.55694	2.57875	2.55094	2.56154	2.57032	2.57698	2.57337	2.55788	2.54956	2.55765	2.55217	2.57846	2.58329	2.55663	2.57143	2.57108
1768.03	2.5581	2.56082	2.56148	2.53876	2.54416	2.55426	2.55586	2.5516	2.53769	2.57001	2.55338	2.55176	2.55803	2.53521	2.55617	2.53637	2.54885	2.53316	2.51844	2.54905	2.55383	2.54937	2.53422	2.54358	2.53797	2.55986	2.53202	2.5427	2.55127	2.55746	2.55415	2.53912	2.53035	2.53853	2.53332	2.55913	2.56412	2.5378	2.5525	2.55191
1766.78	2.53848	2.54106	2.54219	2.51914	2.52474	2.5348	2.53641	2.53188	2.51847	2.55071	2.53397	2.53243	2.53849	2.51583	2.53661	2.51687	2.52928	2.51378	2.49884	2.52948	2.53428	2.53005	2.51497	2.52372	2.51852	2.54042	2.51251	2.5232	2.53176	2.53744	2.53423	2.51983	2.5105	2.51887	2.51388	2.53931	2.54435	2.51842	2.53304	2.53222
1765.54	2.51842	2.52089	2.52234	2.49896	2.50493	2.51478	2.51652	2.51161	2.49875	2.53095	2.5141	2.51265	2.51848	2.49595	2.51669	2.49699	2.50913	2.4939	2.47878	2.50949	2.51424	2.51014	2.49525	2.50347	2.49865	2.52047	2.49251	2.50334	2.51182	2.51702	2.51378	2.50001	2.49022	2.49876	2.49392	2.51894	2.52408	2.49849	2.5131	2.51212
1764.29	2.49794	2.50027	2.5021	2.47847	2.48473	2.49438	2.49626	2.49099	2.4786	2.51076	2.49381	2.49251	2.49812	2.4756	2.4964	2.47671	2.4886	2.47357	2.45835	2.48912	2.49376	2.48978	2.47515	2.48293	2.47841	2.50009	2.47214	2.48323	2.49154	2.49631	2.49286	2.47974	2.46959	2.47826	2.47339	2.49819	2.5034	2.47815	2.49276	2.49164
1763.05	2.47715	2.4793	2.48154	2.4578	2.46424	2.47373	2.47566	2.47012	2.45811	2.49033	2.47318	2.47204	2.47745	2.45493	2.47578	2.45602	2.46783	2.45287	2.43762	2.46841	2.47292	2.46912	2.45478	2.46223	2.45779	2.47942	2.4515	2.46283	2.47102	2.47525	2.47173	2.45915	2.44884	2.4575	2.45254	2.47702	2.48249	2.4575	2.47211	2.47086
1761.8	2.45625	2.45805	2.46073	2.43694	2.44348	2.45295	2.45485	2.44903	2.43732	2.46962	2.45231	2.45134	2.45659	2.43408	2.45482	2.43512	2.4468	2.43201	2.41672	2.44748	2.4519	2.44829	2.43411	2.44134	2.43689	2.4585	2.43069	2.44222	2.45025	2.45394	2.4504	2.43831	2.42792	2.43646	2.43146	2.45567	2.46131	2.43664	2.45123	2.44979
1760.56	2.43521	2.43664	2.43976	2.41591	2.42248	2.43199	2.43381	2.42784	2.41644	2.44869	2.43129	2.43046	2.43556	2.41308	2.43356	2.41403	2.42563	2.41104	2.39567	2.42635	2.43081	2.42732	2.41324	2.42033	2.41589	2.43744	2.40967	2.42136	2.42929	2.4324	2.42894	2.41729	2.40684	2.41528	2.41033	2.43421	2.44001	2.41566	2.43019	2.42849
1759.32	2.41413	2.41513	2.41875	2.39478	2.40133	2.41088	2.41267	2.4066	2.3955	2.42765	2.41019	2.40947	2.41442	2.39202	2.41217	2.39289	2.40446	2.39007	2.37455	2.40507	2.40967	2.40619	2.39223	2.3992	2.39483	2.41633	2.38851	2.40032	2.40815	2.41076	2.40736	2.39622	2.3856	2.39401	2.38924	2.41266	2.41858	2.39462	2.409	2.40708
1758.09	2.39306	2.39367	2.39773	2.37362	2.38012	2.38967	2.39155	2.38534	2.37451	2.40659	2.38907	2.38844	2.39322	2.37098	2.39084	2.37169	2.38329	2.36911	2.35343	2.38375	2.38847	2.38497	2.37118	2.37798	2.37377	2.39517	2.36726	2.37919	2.38695	2.38915	2.38575	2.37509	2.3643	2.37273	2.36816	2.3911	2.39712	2.37354	2.38773	2.3856
1756.85	2.37197	2.37228	2.37678	2.35247	2.35894	2.36849	2.37054	2.3641	2.35353	2.38566	2.36799	2.36749	2.37203	2.35005	2.36961	2.35042	2.36218	2.3481	2.33237	2.36248	2.36726	2.36377	2.35018	2.35677	2.35274	2.37402	2.34605	2.35809	2.36576	2.3676	2.36422	2.354	2.34298	2.3515	2.34708	2.36958	2.3757	2.35249	2.36651	2.36421
1755.62	2.35094	2.351	2.35596	2.33141	2.33785	2.34746	2.34964	2.34297	2.33261	2.36484	2.34703	2.34667	2.35098	2.32928	2.34849	2.32922	2.34119	2.32715	2.31139	2.3414	2.34616	2.34272	2.32927	2.33567	2.33183	2.35299	2.325	2.33714	2.34463	2.34616	2.3429	2.33305	2.32181	2.33031	2.32605	2.34814	2.35439	2.33145	2.34545	2.34301
1754.39	2.33006	2.32982	2.3353	2.31051	2.31697	2.32665	2.32886	2.322	2.31186	2.34422	2.32629	2.32601	2.33016	2.30862	2.32755	2.30821	2.32031	2.30632	2.29058	2.32055	2.32522	2.32195	2.30854	2.31471	2.31105	2.33211	2.30411	2.31638	2.32367	2.3249	2.32173	2.31234	2.30084	2.30929	2.30514	2.32684	2.33326	2.3106	2.32461	2.32198
1753.16	2.30947	2.30885	2.31486	2.28985	2.29634	2.30614	2.30827	2.30127	2.29141	2.32382	2.3058	2.30557	2.30961	2.28814	2.30686	2.28753	2.29963	2.28577	2.27002	2.29995	2.30456	2.30142	2.28805	2.29398	2.29048	2.31146	2.28349	2.2959	2.30298	2.30389	2.30079	2.29189	2.28014	2.28849	2.28442	2.30579	2.31238	2.29001	2.30399	2.3012
1751.93	2.28926	2.28819	2.29469	2.26949	2.27602	2.28594	2.288	2.28084	2.2713	2.30372	2.28562	2.28544	2.28934	2.26793	2.28648	2.2672	2.2792	2.26556	2.24976	2.27958	2.28422	2.28118	2.26787	2.27354	2.27019	2.2911	2.26311	2.27572	2.28259	2.28319	2.28013	2.2717	2.25973	2.26802	2.26401	2.28505	2.29184	2.26973	2.28364	2.28066
1750.7	2.26937	2.26794	2.27485	2.24944	2.25604	2.26606	2.2681	2.26078	2.25148	2.28392	2.26572	2.2657	2.26938	2.24809	2.26648	2.24725	2.25915	2.24573	2.22989	2.25953	2.26424	2.26124	2.24803	2.25347	2.25025	2.27113	2.24311	2.25586	2.26257	2.26282	2.25982	2.2518	2.23961	2.24789	2.24395	2.26469	2.27167	2.24983	2.26357	2.26047
1749.48	2.24985	2.24814	2.25538	2.22974	2.23647	2.24653	2.24859	2.24113	2.23199	2.26449	2.24618	2.24633	2.24979	2.22866	2.24687	2.22766	2.23947	2.22628	2.21037	2.23989	2.24462	2.24166	2.22859	2.23377	2.2307	2.25154	2.22346	2.23638	2.24295	2.24284	2.23992	2.23226	2.21986	2.22816	2.22432	2.24477	2.25186	2.23029	2.24385	2.2407
1748.25	2.23069	2.2288	2.23629	2.21051	2.21732	2.22737	2.22945	2.22187	2.21289	2.2455	2.22709	2.22734	2.2306	2.20968	2.22762	2.20845	2.22021	2.20723	2.19122	2.22063	2.22538	2.22248	2.20957	2.21452	2.21159	2.23241	2.20422	2.21733	2.22379	2.2233	2.22043	2.21312	2.2005	2.20886	2.20513	2.22527	2.23247	2.21113	2.22456	2.22139
1747.03	2.21197	2.20986	2.21762	2.19178	2.19862	2.20863	2.21074	2.20303	2.19427	2.22692	2.20851	2.20872	2.21182	2.19107	2.20877	2.18964	2.20139	2.18864	2.17249	2.20185	2.20658	2.20376	2.19097	2.1957	2.19292	2.21366	2.18542	2.19871	2.20509	2.20425	2.20141	2.19446	2.18162	2.19003	2.18635	2.20619	2.2135	2.19238	2.20573	2.2025
1745.81	2.19373	2.19137	2.19941	2.17355	2.18038	2.19035	2.19249	2.1846	2.1761	2.20876	2.19037	2.19059	2.19349	2.17287	2.19038	2.17127	2.18303	2.17048	2.15421	2.18354	2.18823	2.1855	2.17284	2.17738	2.1747	2.19539	2.16708	2.18056	2.1868	2.18573	2.18283	2.17625	2.16323	2.17168	2.16801	2.18756	2.195	2.17411	2.18739	2.18404
1744.59	2.17599	2.17334	2.18168	2.15581	2.16261	2.17258	2.17473	2.16662	2.15841	2.19107	2.17267	2.17296	2.17565	2.15516	2.17247	2.15339	2.16518	2.15277	2.13642	2.16573	2.17037	2.1677	2.15517	2.15952	2.15695	2.17758	2.14922	2.16287	2.16889	2.1677	2.16473	2.15847	2.14534	2.15382	2.15013	2.16938	2.177	2.15631	2.16957	2.16604
1743.38	2.15873	2.15583	2.16444	2.13851	2.14533	2.15532	2.15743	2.14916	2.14118	2.17388	2.15539	2.15585	2.15827	2.13794	2.15508	2.136	2.14781	2.13549	2.11914	2.14841	2.15299	2.15039	2.13795	2.14217	2.13967	2.16029	2.13188	2.14562	2.15144	2.15012	2.14712	2.14113	2.12791	2.13645	2.13273	2.15172	2.15947	2.13903	2.15221	2.14851
1742.16	2.14194	2.13877	2.14771	2.12167	2.12854	2.13854	2.14058	2.13219	2.12441	2.15716	2.13858	2.13916	2.14137	2.12122	2.13818	2.11911	2.13087	2.11865	2.10236	2.13156	2.13611	2.13355	2.12123	2.12527	2.12291	2.1435	2.11507	2.12881	2.13446	2.13298	2.12999	2.12425	2.11098	2.11954	2.11582	2.13458	2.14243	2.12222	2.13531	2.13149
1740.95	2.12558	2.12217	2.13145	2.10526	2.11221	2.1222	2.1242	2.11572	2.1081	2.14091	2.12227	2.1229	2.12495	2.10496	2.12176	2.10273	2.11442	2.1023	2.08607	2.11511	2.11971	2.1172	2.10502	2.10885	2.10662	2.12719	2.09874	2.11245	2.11802	2.11629	2.11335	2.10788	2.0945	2.10307	2.09942	2.11794	2.1259	2.10589	2.11885	2.11502
1739.74	2.10966	2.10608	2.11564	2.08931	2.0963	2.10631	2.10831	2.09971	2.09226	2.12509	2.10645	2.10708	2.109	2.08915	2.10582	2.08681	2.09846	2.08647	2.07025	2.09913	2.1038	2.10133	2.0893	2.09293	2.09081	2.11137	2.0829	2.09659	2.10208	2.10012	2.09719	2.09204	2.07852	2.08707	2.08355	2.1018	2.10989	2.09003	2.10289	2.09906
1738.53	2.09421	2.09048	2.10025	2.07381	2.08083	2.09089	2.09288	2.08416	2.07687	2.10971	2.09108	2.09176	2.09352	2.07376	2.09033	2.07132	2.08296	2.07111	2.05487	2.08364	2.08837	2.08595	2.07404	2.0775	2.07546	2.09601	2.06751	2.08124	2.0866	2.08447	2.08155	2.07668	2.06302	2.07155	2.06817	2.08616	2.09439	2.0747	2.08745	2.0836
1737.32	2.07926	2.07536	2.08533	2.05878	2.0658	2.07592	2.07792	2.06905	2.06197	2.09476	2.07615	2.07692	2.07852	2.05885	2.0753	2.05627	2.0679	2.05622	2.03995	2.06865	2.07339	2.07103	2.05921	2.06258	2.06056	2.0811	2.05257	2.06639	2.07159	2.06931	2.06638	2.0618	2.04799	2.05652	2.05325	2.07102	2.07938	2.05986	2.07254	2.06862
1736.11	2.06479	2.06069	2.07087	2.04419	2.05126	2.06138	2.06343	2.0544	2.04752	2.0803	2.06166	2.06253	2.06399	2.04437	2.06069	2.04166	2.05329	2.04177	2.02548	2.05414	2.05886	2.05654	2.04481	2.04814	2.04612	2.06665	2.03811	2.052	2.05705	2.05463	2.05171	2.04735	2.03343	2.04198	2.03876	2.05636	2.06483	2.04551	2.05809	2.0541
1734.91	2.05078	2.04647	2.05686	2.03006	2.03715	2.04727	2.04939	2.0402	2.0335	2.06632	2.04763	2.04857	2.04992	2.03035	2.04652	2.02749	2.03914	2.02776	2.01143	2.04009	2.04478	2.04247	2.03083	2.03412	2.03212	2.05268	2.02409	2.03804	2.04298	2.04039	2.03748	2.03335	2.01933	2.02789	2.02471	2.04214	2.05076	2.03161	2.04409	2.04005
1733.7	2.03718	2.03269	2.04327	2.0164	2.02352	2.03361	2.03579	2.02643	2.01991	2.05281	2.03406	2.03505	2.03626	2.01674	2.03277	2.01377	2.02547	2.01418	1.9978	2.02649	2.03115	2.02886	2.0173	2.02053	2.01858	2.03914	2.01052	2.02449	2.02936	2.02658	2.0237	2.01979	2.00568	2.01425	2.01111	2.02837	2.03716	2.01813	2.03051	2.02642
1732.5	2.02399	2.01935	2.03011	2.0032	2.01032	2.02042	2.02261	2.0131	2.00672	2.03972	2.02093	2.02197	2.02305	2.00357	2.01945	2.0005	2.01222	2.00102	1.9846	2.0133	2.01797	2.0157	2.00422	2.00735	2.00551	2.02605	1.99738	2.01138	2.01618	2.01322	2.01038	2.00666	1.99245	2.00101	1.99795	2.01506	2.02398	2.00509	2.01736	2.01321
1731.3	2.01122	2.00643	2.01736	1.99044	1.99756	2.00767	2.00984	2.00024	1.99396	2.02703	2.00821	2.00932	2.01026	1.99085	2.00659	1.98766	1.99935	1.98829	1.97183	2.00053	2.00524	2.003	1.99157	1.99462	1.99286	2.01338	1.98468	1.99873	2.00342	2.00032	1.99749	1.99393	1.97962	1.98819	1.98524	2.00219	2.01122	1.99246	2.00464	2.00043
1730.1	1.99888	1.99395	2.00507	1.9781	1.98525	1.99536	1.99751	1.98782	1.98166	2.01478	1.99592	1.9971	1.99794	1.97857	1.99418	1.97524	1.98691	1.97601	1.95949	1.98817	1.99296	1.99072	1.97937	1.98236	1.98065	2.00112	1.9724	1.98651	1.99112	1.98784	1.98505	1.98165	1.9672	1.97579	1.97296	1.98973	1.99887	1.98024	1.99233	1.98805
1728.91	1.98698	1.98192	1.99324	1.9662	1.97337	1.98347	1.98562	1.97585	1.9698	2.00296	1.98407	1.98529	1.98606	1.96674	1.9822	1.96326	1.97491	1.96418	1.9476	1.97627	1.98112	1.97886	1.96761	1.97055	1.96885	1.98929	1.96054	1.97473	1.97923	1.9758	1.97304	1.9698	1.95523	1.96385	1.96108	1.9777	1.98696	1.96841	1.98041	1.97609
1727.71	1.97554	1.97035	1.98183	1.95472	1.96192	1.972	1.97419	1.96433	1.9584	1.9916	1.97266	1.97394	1.97464	1.95535	1.97067	1.95174	1.96338	1.95281	1.93616	1.96484	1.96969	1.96743	1.95628	1.9592	1.95748	1.97789	1.94911	1.96335	1.96777	1.96416	1.96144	1.95837	1.94372	1.95234	1.94961	1.96612	1.9755	1.95698	1.96891	1.96453
1726.52	1.96457	1.95926	1.97087	1.94371	1.95091	1.96098	1.9632	1.95327	1.94745	1.98067	1.96172	1.96306	1.96368	1.9444	1.95958	1.9407	1.95231	1.94186	1.92518	1.95387	1.95871	1.95646	1.94542	1.94828	1.94656	1.96693	1.93814	1.95239	1.95672	1.95296	1.95026	1.94738	1.93263	1.94125	1.93855	1.955	1.96449	1.94599	1.95785	1.9534
1725.33	1.95405	1.94861	1.96036	1.93317	1.94035	1.95041	1.95265	1.94266	1.93695	1.97022	1.95126	1.95264	1.95314	1.93388	1.94895	1.93011	1.94169	1.93134	1.91466	1.94335	1.9482	1.94597	1.93501	1.93782	1.93611	1.9564	1.92762	1.94186	1.9461	1.94221	1.93954	1.9368	1.92196	1.93058	1.92792	1.94436	1.9539	1.93544	1.94723	1.94272
1724.14	1.94395	1.9384	1.95026	1.92311	1.93025	1.9403	1.94254	1.93248	1.92689	1.96023	1.94123	1.94267	1.94304	1.92382	1.93876	1.91995	1.93151	1.92124	1.90457	1.93327	1.93814	1.93593	1.92505	1.92779	1.9261	1.94629	1.91753	1.93178	1.93593	1.9319	1.92927	1.92664	1.91172	1.92031	1.91773	1.93415	1.94372	1.92535	1.93707	1.9325
1722.95	1.93428	1.92864	1.94059	1.91346	1.92058	1.93062	1.93284	1.92272	1.91724	1.95067	1.93161	1.93309	1.93334	1.91418	1.92899	1.91019	1.92173	1.91154	1.89488	1.9236	1.92851	1.92631	1.91549	1.91816	1.91649	1.93659	1.90785	1.92215	1.92621	1.92202	1.91943	1.91691	1.90188	1.91047	1.90799	1.92437	1.93394	1.91566	1.92733	1.92274
1721.76	1.925	1.91928	1.9313	1.90417	1.91129	1.92134	1.92353	1.91337	1.90795	1.9415	1.92236	1.92389	1.92402	1.90494	1.91961	1.9008	1.91233	1.90223	1.88557	1.91432	1.91925	1.91707	1.9063	1.9089	1.90727	1.92732	1.89854	1.91294	1.91689	1.91254	1.91	1.90759	1.89243	1.90106	1.89865	1.91498	1.92458	1.9064	1.91801	1.91341
1720.58	1.91607	1.91025	1.92239	1.89519	1.90235	1.91241	1.9146	1.90439	1.89901	1.93267	1.91345	1.91501	1.91507	1.89606	1.9106	1.89179	1.9033	1.89328	1.87661	1.90539	1.91032	1.90818	1.89745	1.9	1.8984	1.91847	1.88961	1.90409	1.90793	1.90346	1.90094	1.89864	1.88337	1.89206	1.88969	1.90596	1.91563	1.89753	1.90906	1.90444
1719.39	1.90746	1.90155	1.9138	1.88651	1.89373	1.9038	1.90602	1.89575	1.89038	1.92414	1.90489	1.90646	1.90648	1.88752	1.90191	1.88312	1.8946	1.88466	1.86798	1.8968	1.90171	1.89962	1.88892	1.89145	1.88989	1.90999	1.88105	1.89556	1.89933	1.89477	1.89222	1.89006	1.87468	1.88341	1.88105	1.89731	1.90706	1.88905	1.90046	1.89582
1718.21	1.89914	1.89315	1.90553	1.87813	1.88542	1.89547	1.89777	1.8874	1.88206	1.91592	1.89664	1.89823	1.89822	1.8793	1.89352	1.87478	1.88621	1.87637	1.85968	1.88851	1.89341	1.89138	1.8807	1.88323	1.88168	1.90183	1.87285	1.88735	1.89106	1.88644	1.88384	1.88181	1.86636	1.87511	1.87275	1.88904	1.89885	1.88092	1.89221	1.88754
1717.03	1.89112	1.8851	1.89756	1.87008	1.87742	1.88746	1.88985	1.87932	1.87404	1.90801	1.88868	1.89032	1.89028	1.87139	1.88545	1.86676	1.87815	1.86842	1.85169	1.88056	1.88543	1.88345	1.87281	1.87532	1.8738	1.89396	1.86501	1.87947	1.88313	1.87844	1.87579	1.8739	1.85839	1.86715	1.86479	1.8811	1.89099	1.87312	1.88432	1.87962
1715.85	1.88344	1.87739	1.88991	1.86239	1.86973	1.87977	1.88226	1.87156	1.86635	1.90043	1.88101	1.8827	1.88266	1.86381	1.87771	1.85907	1.87041	1.86081	1.84402	1.87291	1.87778	1.87586	1.86525	1.86772	1.86624	1.88641	1.85751	1.87193	1.87555	1.87077	1.86805	1.86633	1.85075	1.85952	1.85717	1.87348	1.88346	1.86567	1.87679	1.87204
1714.68	1.87609	1.87	1.8826	1.85505	1.86238	1.87243	1.87502	1.86415	1.859	1.8932	1.87368	1.87542	1.87539	1.85657	1.87031	1.85171	1.86303	1.85354	1.83669	1.86561	1.87048	1.86862	1.85805	1.86046	1.859	1.8792	1.85036	1.86473	1.86833	1.86344	1.86065	1.85911	1.84344	1.85222	1.84992	1.86621	1.87627	1.85856	1.86962	1.86483
1713.5	1.86907	1.86296	1.87566	1.84807	1.8554	1.86545	1.86811	1.8571	1.85203	1.88633	1.86672	1.86849	1.86845	1.84966	1.86326	1.84469	1.85599	1.84661	1.82971	1.85862	1.86353	1.86173	1.8512	1.85355	1.85211	1.87235	1.84353	1.85787	1.86146	1.85644	1.85361	1.85224	1.83647	1.84527	1.84302	1.85928	1.86943	1.8518	1.86279	1.85796
1712.33	1.86242	1.85627	1.8691	1.84143	1.84882	1.85885	1.86156	1.85041	1.84544	1.87982	1.86015	1.86191	1.86185	1.84312	1.85658	1.83802	1.84933	1.84005	1.82312	1.852	1.85696	1.85518	1.84473	1.84702	1.84559	1.86585	1.83704	1.85138	1.85493	1.84977	1.84694	1.8457	1.82984	1.83867	1.83645	1.8527	1.86293	1.84535	1.8563	1.85142
1711.16	1.85615	1.84998	1.86289	1.83513	1.8426	1.85261	1.85536	1.84409	1.83922	1.87369	1.85397	1.85572	1.8556	1.83694	1.8503	1.83172	1.84303	1.83384	1.81687	1.84577	1.85074	1.84898	1.83863	1.84087	1.83947	1.8597	1.83089	1.84525	1.84875	1.84344	1.84066	1.83953	1.82355	1.83244	1.83023	1.84645	1.85678	1.83925	1.85012	1.84523
1709.99	1.85027	1.84404	1.85706	1.8292	1.83674	1.84674	1.84951	1.83815	1.83338	1.86791	1.84818	1.84989	1.84973	1.83113	1.84438	1.82578	1.83708	1.82797	1.81097	1.83991	1.84491	1.84317	1.83287	1.83507	1.83371	1.8539	1.82508	1.83948	1.84291	1.83747	1.83473	1.8337	1.81762	1.82657	1.82438	1.84056	1.85097	1.83351	1.84429	1.83937
1708.82	1.84475	1.83847	1.85158	1.82366	1.83123	1.84125	1.84403	1.83259	1.82788	1.86251	1.84275	1.84444	1.84422	1.82568	1.83881	1.8202	1.83148	1.82246	1.80543	1.83441	1.83945	1.83773	1.82747	1.82963	1.82828	1.84847	1.81964	1.83406	1.83743	1.83187	1.82917	1.82821	1.81205	1.82106	1.81886	1.83503	1.84552	1.82811	1.83881	1.83387
1707.65	1.83958	1.83324	1.84646	1.81851	1.82606	1.83609	1.83888	1.8274	1.82273	1.85745	1.83767	1.83934	1.83907	1.82056	1.83356	1.81497	1.82622	1.81727	1.80024	1.82927	1.83438	1.83265	1.82239	1.82453	1.82318	1.8434	1.81455	1.82899	1.83229	1.82663	1.82397	1.82304	1.80683	1.81588	1.81368	1.82986	1.84042	1.82307	1.83368	1.82869
1706.48	1.83475	1.82833	1.84165	1.81371	1.82123	1.83128	1.83407	1.82255	1.81789	1.85272	1.8329	1.8346	1.83426	1.81576	1.82865	1.81009	1.82131	1.81243	1.79541	1.82446	1.82966	1.82791	1.81765	1.81976	1.81842	1.83867	1.8098	1.82423	1.82747	1.82172	1.81911	1.81822	1.80196	1.81103	1.80882	1.82501	1.83566	1.81835	1.82888	1.82387
1705.32	1.83023	1.82376	1.83716	1.80922	1.81674	1.8268	1.82957	1.81803	1.81337	1.8483	1.82844	1.83018	1.82977	1.81126	1.82408	1.80553	1.81672	1.8079	1.79092	1.81998	1.82524	1.82348	1.81323	1.81533	1.81398	1.83427	1.80537	1.8198	1.82296	1.81713	1.81457	1.81372	1.79741	1.8065	1.80429	1.82047	1.83121	1.81394	1.82441	1.81938
1704.16	1.82602	1.81954	1.83297	1.80502	1.81257	1.82261	1.82536	1.81379	1.80916	1.84416	1.82427	1.82609	1.8256	1.80704	1.81983	1.80127	1.81243	1.80369	1.78673	1.81579	1.8211	1.81935	1.80912	1.81119	1.80986	1.83019	1.80123	1.81569	1.81875	1.81286	1.81033	1.80953	1.79318	1.80228	1.80008	1.81622	1.82704	1.80984	1.82025	1.81518
1703	1.82211	1.81561	1.82909	1.8011	1.80867	1.8187	1.82141	1.80984	1.80526	1.8403	1.8204	1.82228	1.82171	1.80312	1.81587	1.79729	1.80845	1.79976	1.7828	1.81189	1.81721	1.8155	1.80529	1.80734	1.80603	1.82639	1.79738	1.81185	1.81482	1.8089	1.80637	1.80562	1.78922	1.79834	1.79618	1.81224	1.82313	1.80602	1.81638	1.81128
1701.84	1.81848	1.81194	1.82551	1.79746	1.80503	1.81503	1.81773	1.80614	1.80163	1.8367	1.81682	1.81873	1.81809	1.79946	1.81219	1.79356	1.80474	1.7961	1.77914	1.80824	1.81358	1.81191	1.80173	1.80375	1.80248	1.82286	1.79382	1.80828	1.81117	1.80523	1.80269	1.80198	1.78552	1.79467	1.79255	1.80855	1.81949	1.80247	1.8128	1.80766
1700.68	1.81512	1.80853	1.82217	1.79409	1.80164	1.81164	1.8143	1.80271	1.79825	1.83336	1.81351	1.81542	1.81473	1.79607	1.80876	1.79011	1.80132	1.79272	1.77575	1.80486	1.81023	1.80858	1.79842	1.80042	1.7992	1.81959	1.79053	1.80497	1.80778	1.80184	1.79928	1.79859	1.78208	1.79127	1.78919	1.80513	1.81614	1.7992	1.80949	1.80434
1699.52	1.81201	1.80536	1.81907	1.79097	1.79854	1.80852	1.81115	1.79955	1.79512	1.8303	1.81046	1.81235	1.81162	1.79294	1.80559	1.7869	1.79816	1.7896	1.77262	1.80174	1.80715	1.80551	1.79539	1.79734	1.79617	1.81658	1.78749	1.80193	1.80469	1.79871	1.79612	1.79549	1.77891	1.78815	1.78609	1.80199	1.81309	1.7962	1.80644	1.80126
1698.37	1.80917	1.80244	1.81623	1.78811	1.79571	1.80568	1.80828	1.79665	1.79225	1.82749	1.80768	1.80954	1.80875	1.79006	1.80266	1.78395	1.79527	1.78672	1.76977	1.79887	1.80435	1.8027	1.79262	1.79452	1.7934	1.81382	1.78472	1.79916	1.80187	1.79582	1.79322	1.79266	1.77603	1.78531	1.78326	1.79911	1.81034	1.79345	1.80367	1.79845
1697.22	1.80659	1.7998	1.81366	1.78551	1.79316	1.80312	1.80568	1.79401	1.78967	1.82496	1.80516	1.807	1.80616	1.78748	1.79999	1.78126	1.79263	1.78411	1.76717	1.79626	1.80183	1.80014	1.79013	1.79197	1.7909	1.81134	1.78219	1.79667	1.79931	1.79318	1.79061	1.79012	1.7734	1.78275	1.78069	1.7965	1.80784	1.79096	1.80118	1.7959
1696.07	1.80425	1.79743	1.81138	1.78321	1.79086	1.80083	1.80334	1.79164	1.78737	1.8227	1.80288	1.80471	1.80383	1.78515	1.79757	1.77884	1.79025	1.78176	1.76481	1.79391	1.79956	1.79783	1.78791	1.78967	1.78864	1.80913	1.77989	1.79442	1.797	1.79081	1.78828	1.78783	1.77104	1.78043	1.77839	1.79413	1.80558	1.7887	1.79895	1.79362
1694.92	1.80214	1.79532	1.80933	1.78117	1.78878	1.79878	1.80121	1.78953	1.78534	1.82067	1.80085	1.80269	1.80176	1.78307	1.79539	1.77668	1.78812	1.77964	1.7627	1.7918	1.79754	1.79576	1.78592	1.78762	1.78662	1.80715	1.77784	1.79239	1.7949	1.78866	1.7862	1.78576	1.76889	1.77832	1.77632	1.79198	1.80352	1.78666	1.79693	1.79156
1693.77	1.80023	1.79345	1.80748	1.77933	1.78689	1.79694	1.79929	1.78763	1.78351	1.81885	1.79904	1.8009	1.79992	1.7812	1.79344	1.77472	1.78621	1.77772	1.76079	1.7899	1.79575	1.79392	1.78414	1.78578	1.7848	1.80536	1.77599	1.79057	1.79298	1.78671	1.78432	1.78385	1.76692	1.77638	1.77444	1.79	1.80163	1.78481	1.79507	1.78967
1692.62	1.7985	1.79175	1.8058	1.77768	1.78519	1.79526	1.79755	1.78593	1.78186	1.8172	1.79744	1.79932	1.79827	1.77951	1.79167	1.77296	1.78447	1.77596	1.75909	1.78819	1.79413	1.79228	1.78252	1.7841	1.78317	1.80371	1.7743	1.7889	1.79122	1.7849	1.7826	1.78208	1.7651	1.77458	1.77269	1.78817	1.7999	1.78312	1.79333	1.78791
1691.47	1.79695	1.79019	1.80426	1.77619	1.78366	1.79372	1.79597	1.78437	1.78034	1.81569	1.796	1.79791	1.79674	1.77794	1.79005	1.77133	1.78283	1.77434	1.75755	1.78662	1.79266	1.79079	1.78103	1.78257	1.78169	1.80214	1.77272	1.78733	1.78958	1.78321	1.78099	1.78044	1.76339	1.77288	1.77103	1.78648	1.7983	1.78157	1.79169	1.78623
1690.33	1.79552	1.78875	1.80283	1.7748	1.78223	1.79229	1.79448	1.78294	1.77892	1.8143	1.79468	1.79658	1.79531	1.77646	1.78852	1.76982	1.78129	1.77284	1.75612	1.78517	1.79128	1.78941	1.77963	1.78116	1.7803	1.80064	1.7712	1.78584	1.78803	1.7816	1.77947	1.77889	1.76175	1.77126	1.76944	1.78487	1.79678	1.7801	1.79013	1.78461
1689.19	1.79418	1.78736	1.80146	1.77347	1.78087	1.79093	1.79303	1.78157	1.77755	1.81297	1.79342	1.79533	1.79395	1.77506	1.78706	1.76838	1.77982	1.77142	1.75475	1.78381	1.78997	1.78811	1.77829	1.77985	1.77897	1.7992	1.76974	1.78441	1.78655	1.78008	1.77802	1.77743	1.76019	1.7697	1.7679	1.78336	1.79533	1.77867	1.78861	1.78305
1688.05	1.79289	1.78601	1.80011	1.77217	1.77955	1.78963	1.79161	1.78027	1.77623	1.81168	1.79219	1.79412	1.79264	1.77372	1.78565	1.76701	1.77843	1.77007	1.75343	1.78254	1.78873	1.78686	1.777	1.77862	1.77769	1.79784	1.76835	1.78305	1.78515	1.77862	1.77663	1.77602	1.75872	1.76824	1.76643	1.78194	1.79394	1.77726	1.78715	1.78156
1686.91	1.79163	1.7847	1.79881	1.77093	1.77826	1.78834	1.79023	1.779	1.77494	1.81044	1.79099	1.79294	1.79139	1.77244	1.78431	1.76568	1.77712	1.76876	1.75216	1.78134	1.78758	1.78566	1.77579	1.77747	1.77647	1.79655	1.76706	1.78176	1.78386	1.77724	1.77531	1.7747	1.75732	1.76685	1.76506	1.78063	1.79265	1.7759	1.78576	1.78019
1685.77	1.79041	1.78344	1.79755	1.76975	1.77701	1.7871	1.78894	1.77777	1.7737	1.80925	1.78981	1.79181	1.79018	1.77122	1.78304	1.7644	1.77586	1.76751	1.75095	1.78019	1.78649	1.78451	1.77467	1.77641	1.77532	1.79536	1.76587	1.78057	1.78268	1.77598	1.77408	1.77346	1.75602	1.76556	1.76381	1.77946	1.79149	1.77467	1.78448	1.77894
1684.64	1.78927	1.78228	1.79639	1.76864	1.77584	1.78594	1.78775	1.77661	1.77253	1.80815	1.78872	1.79074	1.78907	1.7701	1.78185	1.76319	1.77466	1.76634	1.74983	1.77913	1.78546	1.78343	1.77363	1.77542	1.77428	1.7943	1.76481	1.77949	1.78161	1.77484	1.77294	1.77233	1.75484	1.76438	1.76268	1.77842	1.79047	1.77359	1.78334	1.77783
1683.5	1.78824	1.78123	1.79533	1.76762	1.77476	1.78488	1.78669	1.77554	1.77144	1.80716	1.78775	1.78975	1.78809	1.76908	1.78075	1.7621	1.77355	1.7653	1.74881	1.77817	1.78451	1.78247	1.77271	1.77455	1.77334	1.79337	1.76388	1.77851	1.78066	1.77385	1.77195	1.77132	1.7538	1.76335	1.7617	1.77753	1.78961	1.7727	1.78235	1.77686
1682.37	1.78733	1.78033	1.79441	1.76671	1.77382	1.78395	1.78577	1.77459	1.77049	1.8063	1.78693	1.78889	1.78727	1.76821	1.77979	1.76116	1.77258	1.76441	1.74793	1.77734	1.78367	1.78168	1.77191	1.77381	1.77252	1.7926	1.7631	1.77768	1.77986	1.77302	1.77108	1.77045	1.75292	1.76249	1.76087	1.77682	1.78892	1.77199	1.78152	1.77607
1681.24	1.7866	1.77961	1.79363	1.76595	1.77306	1.78318	1.78505	1.77381	1.7697	1.80561	1.78627	1.78819	1.78662	1.76753	1.779	1.76039	1.7718	1.7637	1.74723	1.77669	1.78301	1.78105	1.77128	1.77326	1.77186	1.79201	1.76251	1.77701	1.77923	1.77235	1.77039	1.76977	1.75223	1.76185	1.76024	1.77631	1.78842	1.77144	1.78089	1.77549
1680.11	1.78608	1.77909	1.79306	1.7654	1.77252	1.78263	1.78455	1.77325	1.76913	1.80515	1.78579	1.78771	1.78616	1.76705	1.77844	1.75985	1.77126	1.76319	1.74675	1.77623	1.78258	1.78065	1.77086	1.77292	1.77139	1.79161	1.76212	1.77656	1.77882	1.77188	1.7699	1.76932	1.75174	1.7614	1.75982	1.77601	1.78811	1.77109	1.78046	1.77511
1678.98	1.7858	1.77882	1.79273	1.7651	1.77222	1.78232	1.78432	1.77296	1.76883	1.80497	1.78555	1.78749	1.78594	1.76682	1.77813	1.75956	1.77095	1.76293	1.74649	1.77601	1.78241	1.78048	1.77069	1.77281	1.77116	1.79142	1.76195	1.77635	1.77864	1.77162	1.76965	1.76912	1.75146	1.76117	1.7596	1.77591	1.78799	1.77095	1.78025	1.77494
1677.85	1.78578	1.77881	1.79268	1.76508	1.77221	1.7823	1.78436	1.77298	1.76881	1.80507	1.78558	1.78757	1.78598	1.76685	1.77808	1.75955	1.77088	1.76294	1.74647	1.77604	1.78249	1.78058	1.77077	1.77293	1.77118	1.79145	1.76202	1.77638	1.77872	1.77161	1.76965	1.76917	1.75141	1.76115	1.7596	1.77601	1.78808	1.77104	1.78026	1.77496
1676.73	1.78604	1.77907	1.79292	1.76534	1.77248	1.78258	1.7847	1.7733	1.76908	1.80545	1.78589	1.78793	1.78632	1.76716	1.7783	1.75983	1.77109	1.76323	1.74673	1.77631	1.78282	1.78094	1.77112	1.77331	1.77148	1.79171	1.76234	1.77666	1.77905	1.77185	1.76991	1.76946	1.75162	1.76134	1.75984	1.77633	1.78841	1.77137	1.78051	1.77521
1675.6	1.78657	1.77962	1.79347	1.7659	1.77305	1.78314	1.7853	1.7739	1.76963	1.80609	1.7865	1.78855	1.78695	1.76774	1.77881	1.76038	1.77159	1.76378	1.74725	1.77684	1.78343	1.78154	1.77171	1.77394	1.77208	1.79222	1.76292	1.77721	1.77962	1.77236	1.77043	1.76997	1.75208	1.76177	1.76031	1.77689	1.78899	1.77194	1.78102	1.77571
1674.48	1.7874	1.78048	1.79431	1.76673	1.77389	1.78397	1.78618	1.77475	1.77046	1.80701	1.78739	1.78945	1.78787	1.76859	1.7796	1.7612	1.77238	1.7646	1.74805	1.77764	1.7843	1.78241	1.77256	1.77484	1.77297	1.79302	1.76375	1.77802	1.78046	1.77313	1.77123	1.77072	1.75281	1.76248	1.76106	1.77772	1.78984	1.77274	1.7818	1.77646
1673.36	1.7885	1.78161	1.79542	1.76783	1.77502	1.78508	1.78731	1.77585	1.77157	1.80818	1.78857	1.79061	1.78907	1.76969	1.78067	1.76225	1.77343	1.76566	1.74909	1.77873	1.78543	1.78356	1.77368	1.77599	1.77413	1.79409	1.76481	1.77911	1.78154	1.77416	1.7723	1.77172	1.75379	1.76344	1.76205	1.77881	1.79094	1.77381	1.78284	1.77748
1672.24	1.78986	1.783	1.79678	1.76921	1.77642	1.78646	1.78871	1.77722	1.77293	1.80963	1.79002	1.79205	1.79051	1.77106	1.782	1.76357	1.77473	1.76696	1.7504	1.78009	1.78683	1.78497	1.77508	1.77738	1.77553	1.79544	1.76613	1.78046	1.78289	1.77542	1.77366	1.773	1.75501	1.76467	1.76331	1.78015	1.79229	1.77513	1.78414	1.77876
1671.12	1.79145	1.78463	1.79838	1.77085	1.77807	1.78812	1.79034	1.77884	1.77454	1.81133	1.79172	1.79374	1.79218	1.7727	1.78356	1.76514	1.77628	1.76852	1.75197	1.7817	1.78849	1.78663	1.77674	1.77899	1.77717	1.79702	1.7677	1.78207	1.78448	1.77692	1.77526	1.77455	1.75648	1.76615	1.76479	1.78172	1.79387	1.77669	1.78569	1.78029
1670.01	1.79328	1.7865	1.80023	1.77276	1.77997	1.79002	1.79221	1.78071	1.77641	1.81327	1.79366	1.79566	1.79409	1.77459	1.78536	1.76695	1.77808	1.77032	1.75377	1.78355	1.79039	1.78855	1.77865	1.78084	1.77904	1.79883	1.76953	1.78391	1.78632	1.77867	1.77711	1.77636	1.75821	1.76788	1.76652	1.7835	1.79569	1.77849	1.7875	1.78208
1668.89	1.79534	1.78862	1.80233	1.77488	1.78209	1.79212	1.79429	1.78281	1.77851	1.81544	1.79582	1.79781	1.79622	1.77671	1.78739	1.76898	1.78011	1.77235	1.7558	1.78562	1.79252	1.79068	1.78075	1.78291	1.78116	1.80086	1.7716	1.78597	1.78837	1.78065	1.77916	1.77839	1.76017	1.76985	1.7685	1.78548	1.79773	1.78053	1.78952	1.78408
1667.78	1.79762	1.79095	1.80467	1.7772	1.78442	1.79441	1.79656	1.78513	1.78082	1.8178	1.79819	1.80017	1.79854	1.77902	1.78964	1.77122	1.78236	1.77459	1.75804	1.78789	1.79484	1.79301	1.78306	1.78521	1.7835	1.80312	1.77386	1.78825	1.79062	1.78287	1.78141	1.7806	1.76235	1.77203	1.77071	1.78768	1.79999	1.78278	1.79177	1.7863
1666.67	1.80012	1.79347	1.80721	1.7797	1.78695	1.79692	1.79902	1.78765	1.78333	1.82037	1.80078	1.80273	1.80105	1.78152	1.79209	1.77366	1.78482	1.77704	1.76048	1.79034	1.79737	1.79555	1.78556	1.78772	1.78603	1.8056	1.77632	1.79074	1.79307	1.78531	1.78385	1.783	1.76472	1.7744	1.77311	1.79009	1.80245	1.78524	1.79422	1.78871
1665.56	1.8028	1.79618	1.80992	1.7824	1.78967	1.79964	1.80169	1.79039	1.78603	1.82314	1.80357	1.8055	1.80376	1.78419	1.79474	1.7763	1.78747	1.77968	1.76312	1.793	1.80009	1.79826	1.78826	1.79042	1.78874	1.80828	1.77899	1.79344	1.79572	1.78795	1.78649	1.78561	1.76728	1.77697	1.77567	1.79272	1.80512	1.78789	1.79687	1.79132
1664.45	1.80565	1.79907	1.81281	1.7853	1.79259	1.80254	1.80458	1.79332	1.78893	1.82609	1.80654	1.80846	1.80669	1.78703	1.79758	1.77913	1.79031	1.78252	1.76596	1.79584	1.80299	1.80115	1.79115	1.79331	1.79164	1.81115	1.78184	1.79632	1.79856	1.79075	1.78933	1.78843	1.77001	1.77974	1.77842	1.79553	1.80796	1.79073	1.79972	1.79412
1663.34	1.80867	1.80215	1.81591	1.78837	1.79569	1.80564	1.80766	1.79641	1.79201	1.82923	1.80969	1.81158	1.8098	1.79006	1.8006	1.78215	1.79334	1.78553	1.769	1.79888	1.80611	1.80423	1.79423	1.79636	1.79474	1.81418	1.78489	1.79938	1.80159	1.79374	1.79238	1.79144	1.77291	1.78269	1.78138	1.79851	1.81101	1.79376	1.80275	1.79713
1662.23	1.81188	1.8054	1.81921	1.79163	1.79896	1.80891	1.81092	1.79966	1.79527	1.83255	1.81302	1.81487	1.8131	1.7933	1.80379	1.78536	1.79654	1.78871	1.77222	1.80207	1.8094	1.80749	1.79748	1.79959	1.79803	1.8174	1.78811	1.80262	1.80481	1.79692	1.79561	1.79462	1.776	1.78582	1.78453	1.80166	1.81421	1.79697	1.80597	1.80034
1661.13	1.81529	1.80883	1.82268	1.79507	1.80242	1.81234	1.81436	1.80309	1.79871	1.83605	1.81652	1.81833	1.81656	1.79673	1.80715	1.78874	1.79992	1.79206	1.77561	1.80544	1.81287	1.81096	1.8009	1.80297	1.8015	1.82079	1.79152	1.80604	1.80819	1.8003	1.79902	1.79796	1.7793	1.78912	1.78787	1.80498	1.81758	1.80035	1.80937	1.8037
1660.03	1.81889	1.81244	1.82631	1.7987	1.80605	1.81596	1.81798	1.80671	1.80231	1.83972	1.8202	1.82195	1.82018	1.80032	1.81068	1.79228	1.80348	1.79558	1.77917	1.80896	1.8165	1.8146	1.8045	1.80653	1.80512	1.82437	1.79509	1.80962	1.81174	1.80386	1.8026	1.80146	1.78278	1.7926	1.79136	1.80846	1.82111	1.80389	1.81294	1.8072
1658.93	1.82266	1.81622	1.83009	1.80251	1.80985	1.81974	1.82175	1.8105	1.80609	1.84356	1.82403	1.82576	1.82396	1.80406	1.81439	1.79596	1.8072	1.79927	1.78287	1.81265	1.8203	1.8184	1.80826	1.81025	1.80887	1.82812	1.79882	1.81336	1.81544	1.80756	1.80634	1.80511	1.78643	1.79626	1.79502	1.81211	1.82481	1.80759	1.81667	1.81084
1657.82	1.82657	1.82016	1.83402	1.80646	1.81381	1.8237	1.82567	1.81447	1.81002	1.84755	1.82802	1.82975	1.82792	1.80797	1.81828	1.79979	1.81108	1.80312	1.78672	1.81651	1.82426	1.82235	1.81218	1.81414	1.81281	1.83204	1.80271	1.81727	1.81931	1.81144	1.81026	1.80893	1.79024	1.80008	1.79885	1.81594	1.82867	1.81147	1.82055	1.81463
1656.73	1.83064	1.82425	1.83811	1.81055	1.81791	1.82783	1.82974	1.81858	1.81412	1.85169	1.83217	1.83391	1.83206	1.81203	1.82235	1.80377	1.81512	1.80712	1.79072	1.82053	1.82839	1.82645	1.81624	1.81818	1.81693	1.83609	1.80676	1.82135	1.82333	1.81548	1.81433	1.81292	1.79418	1.80409	1.80283	1.81994	1.83271	1.81551	1.8246	1.8186
1655.63	1.83487	1.8285	1.84238	1.81478	1.82219	1.83211	1.83397	1.82286	1.81839	1.85599	1.83649	1.83823	1.83637	1.81627	1.82657	1.80793	1.81933	1.81129	1.79491	1.8247	1.83268	1.83071	1.82047	1.82236	1.82122	1.84029	1.81097	1.8256	1.82752	1.81969	1.81855	1.8171	1.79828	1.80825	1.80696	1.82409	1.83693	1.81972	1.82882	1.82274
1654.53	1.83925	1.83293	1.84682	1.81918	1.82664	1.83653	1.83838	1.8273	1.82282	1.86045	1.841	1.8427	1.84082	1.82063	1.83094	1.81226	1.82371	1.81564	1.79926	1.82903	1.83712	1.83513	1.82486	1.82671	1.82567	1.84464	1.81533	1.83003	1.83188	1.82404	1.82296	1.82143	1.80255	1.81256	1.81124	1.8284	1.8413	1.8241	1.83323	1.82708
1653.44	1.8438	1.83753	1.85142	1.82376	1.83124	1.84109	1.84296	1.83191	1.82742	1.86508	1.84569	1.84733	1.8454	1.82515	1.83544	1.81678	1.82826	1.82017	1.80379	1.8335	1.84172	1.83972	1.82942	1.83122	1.83025	1.84916	1.81985	1.8346	1.83641	1.82854	1.82754	1.82591	1.80697	1.817	1.81568	1.83285	1.8458	1.82863	1.83779	1.8316
1652.35	1.8485	1.8423	1.85619	1.82852	1.836	1.84583	1.84769	1.83667	1.83217	1.86987	1.85053	1.85212	1.85014	1.82984	1.8401	1.82147	1.83296	1.82486	1.80845	1.83815	1.84649	1.84446	1.83414	1.8359	1.83499	1.85384	1.82454	1.83931	1.8411	1.83319	1.83229	1.83055	1.81156	1.82158	1.82031	1.83747	1.85044	1.83329	1.84252	1.8363
1651.25	1.85337	1.84724	1.86113	1.83342	1.8409	1.85074	1.85258	1.84159	1.83708	1.87482	1.8555	1.85708	1.85507	1.83469	1.84495	1.8263	1.8378	1.82969	1.81325	1.84297	1.85143	1.84934	1.83902	1.84074	1.83989	1.8587	1.82938	1.84417	1.84593	1.838	1.83718	1.83532	1.81631	1.82632	1.8251	1.84226	1.85525	1.83811	1.84737	1.84114
1650.17	1.85839	1.85233	1.86623	1.83847	1.84597	1.85583	1.85763	1.84666	1.84214	1.87993	1.8606	1.86219	1.86017	1.83973	1.84996	1.83126	1.84279	1.83466	1.81821	1.84794	1.85651	1.85437	1.84405	1.84572	1.84496	1.86372	1.83437	1.84917	1.85092	1.84298	1.84223	1.84027	1.8212	1.83123	1.83004	1.84722	1.86024	1.84308	1.85236	1.84614
1649.08	1.86357	1.85756	1.87148	1.84365	1.85122	1.86107	1.86284	1.8519	1.84737	1.88519	1.86585	1.86745	1.8654	1.8449	1.85513	1.83638	1.84794	1.83976	1.82334	1.85305	1.86174	1.85956	1.84923	1.85085	1.85019	1.86891	1.83952	1.85431	1.85606	1.84812	1.84741	1.84537	1.82624	1.83628	1.83512	1.85232	1.8654	1.84819	1.85752	1.85126
1647.99	1.86887	1.86294	1.87687	1.84898	1.85661	1.86643	1.8682	1.85728	1.85275	1.89059	1.87126	1.87285	1.87077	1.85022	1.86044	1.84166	1.85323	1.84502	1.82862	1.85829	1.86711	1.86491	1.85456	1.85611	1.85554	1.87424	1.84483	1.85962	1.86137	1.85341	1.85277	1.85061	1.83144	1.8415	1.84034	1.85754	1.87071	1.85345	1.86284	1.85652
1646.9	1.87429	1.86847	1.88242	1.85447	1.86213	1.87193	1.87371	1.86281	1.85827	1.89615	1.87685	1.8784	1.87628	1.85568	1.86589	1.84709	1.85866	1.85042	1.83406	1.86367	1.87262	1.87045	1.86004	1.86154	1.86103	1.8797	1.85029	1.86511	1.86683	1.85887	1.85828	1.85599	1.8368	1.84685	1.84571	1.86291	1.87617	1.85887	1.86834	1.86192
1645.82	1.87985	1.87415	1.8881	1.86012	1.8678	1.87758	1.87934	1.86847	1.86392	1.90185	1.88258	1.8841	1.88194	1.86129	1.87149	1.85266	1.86422	1.85596	1.83965	1.86922	1.87829	1.87614	1.86566	1.86713	1.86667	1.88531	1.85589	1.87075	1.87242	1.8645	1.86394	1.86152	1.84232	1.85237	1.85122	1.86842	1.88179	1.86444	1.87398	1.86747
1644.74	1.88558	1.87997	1.89394	1.86592	1.87362	1.88339	1.88511	1.87429	1.8697	1.90771	1.88845	1.88994	1.88776	1.86704	1.87721	1.85837	1.86995	1.86163	1.84538	1.87493	1.88413	1.88197	1.87143	1.87286	1.87248	1.89106	1.86163	1.87655	1.87818	1.87028	1.86973	1.86719	1.84798	1.85807	1.85689	1.87409	1.88754	1.87016	1.87975	1.87316
1643.66	1.8915	1.88593	1.89992	1.87186	1.87961	1.88934	1.89103	1.88025	1.87563	1.91373	1.89446	1.89591	1.89376	1.87293	1.88307	1.86423	1.87585	1.86746	1.85126	1.88079	1.89014	1.88794	1.87735	1.87872	1.87845	1.89698	1.86752	1.88248	1.88408	1.87618	1.87564	1.87302	1.85377	1.86391	1.8627	1.87992	1.89342	1.87601	1.88567	1.87902
1642.58	1.8976	1.89203	1.90604	1.87794	1.88576	1.89545	1.89711	1.88635	1.88173	1.91988	1.90062	1.90202	1.89991	1.87898	1.88905	1.87023	1.88191	1.87346	1.85728	1.88678	1.89626	1.89403	1.8834	1.88472	1.88455	1.90306	1.87356	1.88857	1.89014	1.88222	1.88171	1.87903	1.8597	1.86992	1.86867	1.88592	1.89942	1.88201	1.89173	1.88505
1641.5	1.90384	1.89829	1.91231	1.8842	1.89204	1.9017	1.90334	1.89261	1.88799	1.92617	1.90693	1.90828	1.90619	1.8852	1.8952	1.87639	1.88811	1.87962	1.86344	1.8929	1.90251	1.90026	1.88958	1.89087	1.8908	1.90927	1.87974	1.89481	1.8963	1.8884	1.88795	1.88519	1.86576	1.87606	1.87479	1.89206	1.90557	1.88816	1.89797	1.89125
1640.42	1.91019	1.90468	1.91874	1.89061	1.89846	1.90811	1.90973	1.89904	1.89441	1.93259	1.9134	1.91468	1.9126	1.89157	1.90153	1.8827	1.89445	1.88594	1.86975	1.89918	1.90889	1.90664	1.89589	1.89715	1.89718	1.91561	1.88608	1.90118	1.90258	1.89473	1.89435	1.89153	1.87198	1.88232	1.88104	1.89834	1.91187	1.89447	1.90435	1.8976
1639.34	1.91666	1.91124	1.92532	1.89715	1.90502	1.91467	1.91625	1.90564	1.90096	1.93916	1.92002	1.92123	1.91916	1.89807	1.90804	1.88915	1.90094	1.89241	1.8762	1.90558	1.91545	1.91316	1.90238	1.9036	1.90374	1.92209	1.89257	1.90771	1.909	1.90122	1.90088	1.898	1.87836	1.88871	1.88743	1.90473	1.91832	1.90093	1.91088	1.90407
1638.27	1.92327	1.91797	1.93203	1.90382	1.91172	1.92137	1.92289	1.91237	1.90763	1.94588	1.92679	1.92794	1.92586	1.9047	1.9147	1.89577	1.90759	1.89902	1.88278	1.91213	1.92218	1.91982	1.90903	1.91022	1.91043	1.92873	1.89922	1.9144	1.9156	1.90784	1.90756	1.90458	1.88491	1.89523	1.89397	1.91127	1.92493	1.90752	1.91753	1.91067
1637.2	1.93002	1.92486	1.93889	1.91066	1.91858	1.9282	1.92968	1.91922	1.91444	1.95275	1.9337	1.93482	1.93271	1.91147	1.92151	1.90254	1.91438	1.90577	1.88949	1.91883	1.92906	1.92663	1.91584	1.91698	1.91727	1.93555	1.906	1.92122	1.92236	1.91459	1.91438	1.91127	1.89158	1.90191	1.90068	1.918	1.93171	1.91426	1.92432	1.91737
1636.13	1.93694	1.93189	1.94587	1.91765	1.9256	1.93519	1.93661	1.92619	1.92138	1.95978	1.94076	1.94187	1.93969	1.91839	1.92845	1.90946	1.92132	1.91267	1.89637	1.92569	1.93608	1.93359	1.92279	1.92389	1.92425	1.94252	1.91292	1.92819	1.92926	1.9215	1.92134	1.9181	1.89838	1.90876	1.90755	1.92488	1.93863	1.92113	1.93125	1.92422
1635.06	1.94403	1.93905	1.95299	1.92479	1.93277	1.94235	1.94369	1.93329	1.92848	1.96695	1.94796	1.94907	1.94682	1.92547	1.93554	1.91653	1.92841	1.91972	1.90342	1.93271	1.94323	1.94071	1.92985	1.93093	1.93136	1.94962	1.91998	1.93527	1.93633	1.9286	1.92846	1.92509	1.90532	1.91576	1.91457	1.93192	1.9457	1.92817	1.93833	1.93123
1633.99	1.95125	1.94634	1.96028	1.93205	1.94006	1.94964	1.95092	1.94056	1.93573	1.97425	1.95531	1.9564	1.9541	1.93268	1.94276	1.9237	1.93566	1.92689	1.91061	1.93987	1.95054	1.94798	1.93704	1.93812	1.93859	1.95685	1.9272	1.94246	1.94355	1.93586	1.93573	1.93226	1.91242	1.92292	1.9217	1.93907	1.95287	1.93535	1.94557	1.93843
1632.92	1.95861	1.95375	1.96771	1.93944	1.94748	1.95704	1.95828	1.94797	1.94312	1.98168	1.96279	1.96387	1.96153	1.94003	1.95012	1.93101	1.94306	1.93419	1.91794	1.94716	1.95798	1.95537	1.94437	1.94546	1.94599	1.9642	1.93454	1.94981	1.95094	1.94324	1.94316	1.93959	1.91968	1.9302	1.92896	1.94636	1.96018	1.94268	1.95296	1.9458
1631.85	1.96609	1.96132	1.97529	1.94699	1.95503	1.96456	1.96583	1.95552	1.95065	1.98925	1.9704	1.97146	1.96912	1.94751	1.9576	1.93847	1.95058	1.94162	1.92542	1.95458	1.96555	1.96289	1.95189	1.95295	1.95354	1.97169	1.94203	1.95732	1.95846	1.95074	1.95074	1.94706	1.92709	1.93762	1.93634	1.95377	1.96765	1.95016	1.9605	1.95329
1630.79	1.97369	1.96904	1.98302	1.95468	1.96275	1.97223	1.97352	1.96324	1.95831	1.997	1.97815	1.97919	1.97688	1.95515	1.9652	1.94609	1.95821	1.94918	1.93304	1.96216	1.97327	1.97057	1.95956	1.96056	1.96124	1.97933	1.94964	1.96499	1.96612	1.95837	1.95845	1.95465	1.93466	1.94519	1.94386	1.96133	1.97527	1.95779	1.96815	1.96089
1629.73	1.98144	1.97692	1.9909	1.96251	1.97064	1.98005	1.98137	1.97112	1.96612	2.00492	1.98607	1.98706	1.98476	1.96295	1.97298	1.95386	1.96597	1.95689	1.94081	1.9699	1.98115	1.97841	1.96737	1.96828	1.96907	1.98711	1.95741	1.97281	1.9739	1.96616	1.96632	1.96239	1.94235	1.95291	1.95154	1.96904	1.9831	1.96556	1.97593	1.96862
1628.66	1.98935	1.98494	1.99889	1.97048	1.97866	1.98803	1.98934	1.97915	1.97408	2.01299	1.99416	1.99507	1.99279	1.97089	1.98095	1.96176	1.97389	1.96476	1.94873	1.97778	1.98921	1.98641	1.97531	1.97614	1.97705	1.99504	1.96536	1.98077	1.98182	1.97413	1.9743	1.97029	1.95018	1.96079	1.95937	1.97692	1.9911	1.97346	1.98386	1.97649
1627.6	1.99745	1.99311	2.00702	1.97858	1.98684	1.99618	1.99745	1.98734	1.98224	2.02116	2.00243	2.00323	2.00098	1.97896	1.98907	1.9698	1.98196	1.97281	1.95681	1.98578	1.99743	1.99459	1.9834	1.98415	1.98522	2.00313	1.97346	1.98888	1.98988	1.98228	1.98246	1.97833	1.95814	1.96881	1.96735	1.98494	1.99924	1.9815	1.99196	1.98453
1626.55	2.0057	2.00143	2.01528	1.98684	1.99515	2.00448	2.0057	1.99569	1.99056	2.02947	2.01085	2.01154	2.00936	1.98717	1.99731	1.978	1.99018	1.98104	1.96505	1.99392	2.00581	2.00293	1.99166	1.99233	1.99358	2.01138	1.98172	1.99718	1.99809	1.9906	1.99078	1.98653	1.96624	1.97699	1.97549	1.99313	2.00753	1.98972	2.00022	1.99273
1625.49	2.01408	2.00992	2.02369	1.99526	2.00361	2.01291	2.01414	2.00422	1.999	2.03792	2.0194	2.02001	2.01792	1.99552	2.00569	1.98639	1.99856	1.98941	1.97343	2.00222	2.01434	2.01141	2.00007	2.00068	2.00209	2.01978	1.99013	2.00564	2.00646	1.99908	1.99928	1.99487	1.97451	1.98531	1.98379	2.00147	2.01594	1.99811	2.00863	2.00108
1624.43	2.02261	2.01858	2.0323	2.00385	2.01222	2.02148	2.02273	2.01289	2.00758	2.04654	2.02809	2.02864	2.0266	2.00405	2.01421	1.99493	2.00716	1.99794	1.98195	2.01067	2.02301	2.02	2.00861	2.0092	2.01072	2.02836	1.99872	2.01426	2.01501	2.00768	2.00793	2.00333	1.98293	1.99376	1.99226	2.00996	2.02448	2.00667	2.0172	2.00958
1623.38	2.03131	2.02738	2.04108	2.01262	2.021	2.03021	2.03147	2.0217	2.01632	2.05535	2.03692	2.03746	2.03539	2.01279	2.02288	2.00363	2.01594	2.00659	1.9906	2.01929	2.03182	2.0287	2.01727	2.01789	2.01945	2.0371	2.00748	2.02299	2.0237	2.01642	2.01672	2.01192	1.99152	2.0024	2.00086	2.01864	2.03318	2.01536	2.02593	2.01826
1622.32	2.04016	2.03632	2.05004	2.02156	2.02994	2.03913	2.04036	2.03063	2.02521	2.06431	2.04591	2.04642	2.04428	2.0217	2.03171	2.01247	2.02487	2.01539	1.9994	2.02805	2.04078	2.03759	2.02607	2.02675	2.02833	2.04603	2.0164	2.03184	2.03254	2.02529	2.02568	2.02067	2.0003	2.01119	2.00961	2.02749	2.04205	2.02417	2.03483	2.02709
1621.27	2.04916	2.0454	2.05913	2.03062	2.03904	2.04825	2.04941	2.03973	2.03427	2.07341	2.05505	2.05553	2.05331	2.03076	2.04072	2.02145	2.03393	2.02435	2.00837	2.03696	2.04987	2.04666	2.03506	2.03576	2.0374	2.0551	2.02543	2.04083	2.04153	2.03435	2.0348	2.02963	2.00924	2.02017	2.01852	2.03649	2.0511	2.03313	2.04386	2.03608
1620.22	2.05829	2.05464	2.06837	2.03982	2.0483	2.05755	2.05863	2.04898	2.0435	2.08268	2.06434	2.06476	2.06251	2.03993	2.04989	2.03056	2.04309	2.03348	2.01751	2.04602	2.05911	2.05592	2.04424	2.04491	2.04668	2.0643	2.03459	2.04999	2.05067	2.04359	2.0441	2.03876	2.01836	2.02931	2.02762	2.04564	2.06032	2.04223	2.05306	2.04522
1619.17	2.06757	2.06405	2.07774	2.04916	2.05769	2.06696	2.06799	2.05839	2.05289	2.09208	2.0738	2.07415	2.07191	2.04923	2.0592	2.03983	2.05242	2.04276	2.02682	2.05523	2.06852	2.06534	2.05362	2.05421	2.05615	2.07362	2.0439	2.05935	2.06001	2.05301	2.05355	2.04803	2.02762	2.0386	2.03691	2.05495	2.06967	2.05149	2.06242	2.05453
1618.12	2.07701	2.07363	2.0873	2.0587	2.06727	2.07651	2.07749	2.06793	2.06243	2.10165	2.08341	2.08374	2.0815	2.05867	2.06863	2.0493	2.06193	2.05221	2.03631	2.06465	2.07809	2.07488	2.06315	2.06368	2.06578	2.08308	2.05339	2.06887	2.0695	2.06261	2.06318	2.05743	2.03703	2.04802	2.04637	2.06444	2.07919	2.0609	2.07195	2.064
1617.08	2.08664	2.08338	2.09704	2.06841	2.077	2.08623	2.08711	2.07764	2.0721	2.11138	2.09324	2.0935	2.09126	2.0683	2.07826	2.05896	2.07163	2.06183	2.046	2.07426	2.08783	2.08457	2.07282	2.0733	2.07556	2.09273	2.06309	2.07857	2.07914	2.07237	2.07298	2.06698	2.04659	2.05757	2.05597	2.07407	2.08889	2.07052	2.08165	2.07364
1616.03	2.09643	2.09333	2.10697	2.07829	2.08689	2.09613	2.09686	2.08752	2.08192	2.12131	2.1033	2.10342	2.10121	2.07811	2.08807	2.06881	2.0815	2.07159	2.05589	2.08406	2.0978	2.09444	2.08265	2.08309	2.08549	2.10256	2.07298	2.08843	2.08893	2.08231	2.08295	2.07671	2.05629	2.0673	2.06572	2.08386	2.09879	2.08031	2.09155	2.08347
1614.99	2.10641	2.10344	2.11703	2.08832	2.09693	2.10621	2.10683	2.09761	2.09193	2.13143	2.11354	2.1135	2.11134	2.08808	2.0981	2.07883	2.09153	2.08152	2.06593	2.09399	2.10798	2.10449	2.09264	2.09303	2.09557	2.11257	2.08307	2.09846	2.0989	2.09239	2.09307	2.08667	2.06614	2.07722	2.07565	2.09385	2.10888	2.09024	2.10163	2.09352
1613.94	2.11659	2.11371	2.12722	2.09855	2.10711	2.11644	2.11702	2.10791	2.10212	2.14174	2.12393	2.12377	2.12162	2.09821	2.10831	2.089	2.10171	2.09165	2.07612	2.10405	2.11835	2.11471	2.10281	2.10314	2.10581	2.12277	2.09333	2.10865	2.10908	2.10262	2.10336	2.09683	2.07618	2.08732	2.08573	2.10404	2.11912	2.10032	2.11191	2.10373
1612.9	2.12697	2.12414	2.13757	2.10894	2.11744	2.12679	2.12745	2.11837	2.11254	2.15222	2.13445	2.13425	2.13209	2.10853	2.11867	2.09935	2.11206	2.102	2.08647	2.11424	2.1289	2.12507	2.11316	2.11344	2.11625	2.13319	2.10374	2.11904	2.11944	2.11302	2.1138	2.10714	2.08643	2.0976	2.09598	2.11444	2.12955	2.11059	2.12233	2.11409
1611.86	2.13752	2.13475	2.14811	2.11952	2.12799	2.13731	2.13806	2.12899	2.1231	2.16286	2.1451	2.14494	2.14273	2.11904	2.1292	2.10987	2.12259	2.11251	2.09696	2.12458	2.13963	2.1356	2.12367	2.12396	2.1269	2.14382	2.11432	2.12964	2.12997	2.1236	2.12448	2.11759	2.09688	2.10807	2.1064	2.12501	2.14014	2.1211	2.13288	2.12457
1610.82	2.14823	2.14558	2.15882	2.13027	2.13875	2.14799	2.14881	2.13983	2.13384	2.17367	2.15592	2.15583	2.15356	2.12975	2.13989	2.12056	2.13333	2.12318	2.10761	2.13516	2.1506	2.14634	2.13436	2.13469	2.13779	2.15461	2.12505	2.14045	2.14069	2.13438	2.13535	2.12821	2.10755	2.11873	2.11701	2.13576	2.15093	2.13183	2.1436	2.13518
1609.79	2.1591	2.15662	2.16972	2.1412	2.14976	2.15885	2.15971	2.15088	2.14475	2.18466	2.16692	2.16689	2.16461	2.14067	2.15076	2.13145	2.14427	2.13404	2.11848	2.14599	2.16174	2.15734	2.14525	2.14559	2.14888	2.16556	2.13594	2.15145	2.15157	2.14539	2.14643	2.13904	2.11837	2.12964	2.12781	2.14666	2.16191	2.14278	2.15448	2.14599
1608.75	2.17016	2.16785	2.18085	2.15233	2.16099	2.16994	2.17081	2.16216	2.15586	2.19582	2.17814	2.17815	2.17584	2.15179	2.16184	2.14255	2.15544	2.14508	2.12956	2.15705	2.17305	2.16855	2.15632	2.15663	2.1601	2.17666	2.14701	2.16258	2.16265	2.1566	2.15769	2.15008	2.12935	2.14073	2.1388	2.15775	2.17307	2.1539	2.16554	2.15702
1607.72	2.18136	2.1793	2.19226	2.16364	2.17237	2.18124	2.18211	2.17361	2.16721	2.20721	2.1896	2.18956	2.18725	2.1631	2.17317	2.15386	2.16688	2.15633	2.14088	2.16828	2.18449	2.17997	2.16763	2.16785	2.17146	2.18797	2.15829	2.17388	2.17391	2.16801	2.16913	2.1613	2.14047	2.15201	2.14996	2.16903	2.18441	2.1652	2.1768	2.1683
1606.68	2.19277	2.19091	2.20388	2.17515	2.18398	2.1928	2.1936	2.1852	2.1788	2.21884	2.2013	2.20118	2.19881	2.17459	2.1847	2.16535	2.17855	2.16778	2.15242	2.17963	2.19607	2.19155	2.1791	2.17934	2.18298	2.1995	2.16981	2.18536	2.18538	2.17961	2.18076	2.17267	2.15183	2.16343	2.16133	2.18053	2.19597	2.17666	2.18826	2.1798
1605.65	2.20439	2.20268	2.21567	2.18686	2.19578	2.2046	2.20522	2.19693	2.19059	2.23071	2.2132	2.213	2.21057	2.18626	2.19642	2.17702	2.19039	2.17945	2.16418	2.19115	2.20788	2.20329	2.19076	2.19108	2.19474	2.21125	2.18154	2.19705	2.19704	2.1914	2.19256	2.18423	2.16342	2.17498	2.17289	2.19227	2.20778	2.18829	2.19996	2.19148
1604.62	2.21623	2.21463	2.22761	2.19877	2.2078	2.21665	2.21703	2.20882	2.20253	2.24276	2.22528	2.22502	2.22254	2.19811	2.20827	2.1889	2.20239	2.19131	2.17614	2.20281	2.21992	2.21519	2.20265	2.20303	2.20674	2.22321	2.19347	2.20893	2.20891	2.20335	2.20456	2.19601	2.17523	2.18671	2.18468	2.20423	2.2198	2.20009	2.21189	2.20333
1603.59	2.22831	2.22679	2.23973	2.21094	2.21995	2.22887	2.22912	2.22095	2.21459	2.25499	2.23754	2.23726	2.23473	2.2102	2.22031	2.20104	2.21452	2.20342	2.18828	2.21468	2.2322	2.2273	2.21475	2.21518	2.21901	2.23539	2.2056	2.22108	2.22101	2.21555	2.2168	2.20804	2.18726	2.19867	2.19667	2.21643	2.23202	2.2121	2.22407	2.21541
1602.56	2.24065	2.23919	2.25202	2.22335	2.23224	2.24124	2.24149	2.2333	2.22682	2.26739	2.25003	2.24971	2.24716	2.2225	2.23255	2.2134	2.22684	2.21577	2.20062	2.22678	2.24475	2.23963	2.22707	2.22746	2.23153	2.24777	2.21797	2.23345	2.23331	2.22801	2.22927	2.22029	2.1995	2.21088	2.20891	2.22885	2.24444	2.22435	2.23648	2.22772
1601.54	2.25317	2.25187	2.26453	2.23594	2.24474	2.25378	2.25414	2.24591	2.2393	2.28002	2.26276	2.26234	2.25986	2.23504	2.24506	2.22597	2.23937	2.22834	2.21318	2.23913	2.25755	2.25224	2.23957	2.23994	2.2443	2.26039	2.23062	2.24602	2.24586	2.24074	2.242	2.23277	2.21192	2.2233	2.22136	2.24144	2.2571	2.23686	2.2491	2.24021
1600.51	2.26587	2.26481	2.27725	2.24871	2.25744	2.26653	2.26701	2.25875	2.25209	2.29286	2.2757	2.27515	2.27282	2.24777	2.2578	2.23871	2.25215	2.24109	2.22597	2.25177	2.27055	2.26517	2.25229	2.25261	2.25727	2.27321	2.24352	2.25881	2.25864	2.25371	2.25496	2.24549	2.22452	2.23592	2.23403	2.25418	2.27001	2.24962	2.2619	2.25295
1599.49	2.27877	2.278	2.2902	2.26169	2.27038	2.27949	2.28008	2.27187	2.26516	2.3059	2.2889	2.2882	2.28598	2.26068	2.27076	2.25164	2.26516	2.25399	2.23899	2.26465	2.28374	2.27834	2.26523	2.26551	2.27043	2.28621	2.25659	2.27178	2.27164	2.26687	2.26812	2.25846	2.23731	2.24876	2.24691	2.26715	2.28317	2.26265	2.27487	2.26588
1598.47	2.29187	2.2914	2.30339	2.27491	2.28359	2.2927	2.29331	2.28523	2.27844	2.31916	2.3023	2.30152	2.29933	2.27382	2.28392	2.2648	2.27845	2.26706	2.25225	2.27779	2.29715	2.29174	2.27842	2.27862	2.2838	2.2994	2.26985	2.285	2.28488	2.28025	2.28148	2.2716	2.25028	2.26191	2.25997	2.28036	2.29653	2.27593	2.28806	2.27904
1597.44	2.30527	2.30501	2.31682	2.28837	2.29707	2.30613	2.30671	2.29882	2.29186	2.33266	2.31589	2.31513	2.31291	2.28716	2.29733	2.27823	2.29196	2.28038	2.26576	2.29112	2.3108	2.30527	2.29186	2.29199	2.29739	2.31277	2.2833	2.29847	2.29833	2.29383	2.29508	2.28497	2.26353	2.27535	2.27322	2.29386	2.31012	2.28943	2.30154	2.29246
1596.42	2.31894	2.31887	2.33052	2.30208	2.31082	2.31979	2.3203	2.31263	2.3055	2.34646	2.32968	2.32901	2.32672	2.30078	2.31093	2.29198	2.3057	2.29403	2.27952	2.30465	2.3247	2.31899	2.30552	2.30563	2.31134	2.32642	2.297	2.31221	2.31201	2.30767	2.30899	2.29852	2.2771	2.28905	2.2867	2.30766	2.32394	2.30316	2.31531	2.30617
1595.41	2.33281	2.33296	2.34439	2.31599	2.32482	2.33371	2.33414	2.32667	2.31938	2.36056	2.34373	2.3431	2.34084	2.31473	2.3248	2.30602	2.31966	2.30799	2.29351	2.31838	2.33886	2.33294	2.31942	2.31957	2.3256	2.34046	2.31093	2.32621	2.32593	2.32177	2.32323	2.31231	2.29098	2.30296	2.30049	2.3217	2.338	2.31712	2.32929	2.32012
1594.39	2.34689	2.34725	2.35848	2.3302	2.33905	2.34788	2.34825	2.34101	2.33351	2.37492	2.35812	2.35746	2.3552	2.32892	2.33891	2.32033	2.33392	2.32226	2.30773	2.33237	2.35332	2.3472	2.33357	2.33378	2.34014	2.35486	2.32516	2.34042	2.34007	2.33613	2.33776	2.3264	2.30511	2.31709	2.31456	2.33597	2.35232	2.33136	2.34345	2.33426
1593.37	2.36122	2.36175	2.37281	2.34464	2.35351	2.36232	2.36267	2.3556	2.34792	2.38951	2.37283	2.37205	2.3698	2.34341	2.35329	2.33486	2.34844	2.33674	2.32221	2.34664	2.36809	2.36175	2.34799	2.34822	2.35491	2.36949	2.33968	2.35489	2.35448	2.35078	2.35254	2.34076	2.31943	2.33146	2.32893	2.3505	2.36692	2.3459	2.35782	2.34864
1592.36	2.3759	2.3765	2.38741	2.35927	2.36822	2.37706	2.37736	2.37041	2.36258	2.40431	2.3878	2.38684	2.38465	2.35818	2.36791	2.34963	2.36322	2.35148	2.33697	2.36116	2.38313	2.37657	2.36273	2.36289	2.36987	2.38428	2.35446	2.3696	2.36916	2.36572	2.36753	2.35538	2.33395	2.34609	2.34351	2.36534	2.38178	2.36064	2.37244	2.36323
1591.34	2.39081	2.39154	2.40234	2.37416	2.38315	2.39208	2.39231	2.38541	2.3775	2.41936	2.40301	2.40185	2.39969	2.37317	2.38278	2.36462	2.37826	2.36646	2.35201	2.37597	2.39839	2.39155	2.37775	2.37782	2.38504	2.39922	2.36951	2.38451	2.38411	2.38092	2.38275	2.37018	2.34871	2.36103	2.35829	2.38049	2.39693	2.37559	2.38737	2.3781
1590.33	2.40596	2.40692	2.41755	2.38928	2.39837	2.40738	2.40751	2.40066	2.39267	2.43468	2.41848	2.41714	2.41497	2.38839	2.39788	2.37984	2.39354	2.3817	2.3673	2.39102	2.4139	2.40676	2.39301	2.39301	2.4005	2.41442	2.38483	2.39968	2.39927	2.39642	2.3982	2.38525	2.36375	2.37616	2.37332	2.39597	2.41238	2.39075	2.4026	2.39329
1589.32	2.42129	2.42252	2.43304	2.40475	2.41393	2.42295	2.42297	2.4162	2.40814	2.45029	2.43419	2.43276	2.43051	2.40386	2.41328	2.39529	2.40912	2.39722	2.38281	2.40631	2.42972	2.42228	2.40848	2.40853	2.41635	2.42996	2.4004	2.41512	2.41465	2.41221	2.41398	2.40056	2.37906	2.39154	2.3886	2.41172	2.42822	2.40621	2.41813	2.40878
1588.31	2.43684	2.43828	2.44878	2.42055	2.42979	2.43878	2.43872	2.43209	2.42395	2.46613	2.45015	2.44864	2.44638	2.41948	2.42894	2.41103	2.42506	2.41305	2.39862	2.42187	2.44599	2.4381	2.42421	2.42433	2.43252	2.44587	2.41627	2.43093	2.43022	2.42829	2.43008	2.41619	2.39462	2.40716	2.40418	2.42773	2.44443	2.42192	2.43395	2.42454
1587.3	2.45267	2.45429	2.46472	2.43664	2.44591	2.45496	2.45479	2.44829	2.44004	2.48229	2.46638	2.46477	2.46267	2.43536	2.4449	2.42713	2.44135	2.42916	2.41474	2.43769	2.46251	2.45426	2.44023	2.44042	2.44901	2.4621	2.43244	2.44705	2.4461	2.44475	2.44649	2.43217	2.41052	2.42305	2.42005	2.44398	2.46102	2.4379	2.45002	2.44058
1586.29	2.46878	2.47059	2.48087	2.45302	2.46221	2.4714	2.47124	2.46482	2.45641	2.49869	2.48292	2.48117	2.47932	2.45149	2.46111	2.44356	2.45794	2.44562	2.43129	2.4538	2.47927	2.47068	2.45651	2.45685	2.46578	2.47867	2.44898	2.46348	2.46223	2.4615	2.46321	2.44849	2.42669	2.43924	2.4362	2.46046	2.47781	2.45416	2.46632	2.45692
1585.29	2.48522	2.48732	2.49733	2.46965	2.4788	2.48801	2.48804	2.48162	2.47297	2.51538	2.49979	2.49788	2.49617	2.46802	2.47773	2.46027	2.47481	2.46232	2.44821	2.4702	2.49628	2.48736	2.47305	2.47355	2.48291	2.4955	2.4659	2.48019	2.47871	2.47857	2.48026	2.46505	2.44317	2.45574	2.45261	2.47721	2.49475	2.47076	2.48287	2.47353
1584.28	2.50197	2.50445	2.51409	2.48656	2.49572	2.50475	2.50511	2.49876	2.48971	2.53229	2.51696	2.51501	2.51322	2.48492	2.49467	2.47725	2.49193	2.47926	2.46535	2.48691	2.51363	2.50437	2.4899	2.49046	2.50047	2.51262	2.48305	2.49722	2.49553	2.49587	2.49762	2.48182	2.45988	2.47249	2.46932	2.49434	2.51192	2.48768	2.49967	2.49041
1583.28	2.51904	2.52189	2.53119	2.50376	2.51293	2.52176	2.52234	2.51621	2.50677	2.54956	2.53449	2.5325	2.53056	2.50212	2.51188	2.49461	2.50942	2.49651	2.48271	2.50394	2.53141	2.52175	2.5071	2.50763	2.51834	2.52998	2.50039	2.51455	2.51268	2.51338	2.51525	2.49879	2.47689	2.48957	2.48633	2.51182	2.52929	2.5049	2.51681	2.50752
1582.28	2.53647	2.53953	2.54864	2.52125	2.53033	2.53919	2.53977	2.53407	2.52409	2.56716	2.55235	2.55023	2.54827	2.51955	2.52933	2.51233	2.52727	2.51406	2.5003	2.52125	2.54956	2.53942	2.52471	2.52513	2.5365	2.54757	2.51797	2.53212	2.53014	2.53123	2.53319	2.51601	2.49418	2.50698	2.50369	2.52969	2.54709	2.52247	2.53429	2.52491
1581.28	2.55421	2.55743	2.56636	2.53894	2.54797	2.55699	2.55746	2.55227	2.54175	2.58515	2.57048	2.56819	2.56634	2.5372	2.54708	2.53036	2.54545	2.53204	2.51823	2.53885	2.56806	2.55735	2.54254	2.54306	2.55497	2.56552	2.53583	2.54995	2.54785	2.5495	2.55135	2.53362	2.5118	2.52475	2.52138	2.5479	2.56535	2.54038	2.55211	2.54266
1580.28	2.57224	2.57567	2.58441	2.55684	2.56599	2.57519	2.57551	2.57078	2.5598	2.60342	2.58879	2.58646	2.5847	2.55532	2.56518	2.54866	2.56382	2.55037	2.53656	2.55674	2.58691	2.57554	2.56067	2.56145	2.5738	2.58377	2.55411	2.56809	2.56577	2.56816	2.56988	2.5516	2.52974	2.54286	2.53943	2.56646	2.58402	2.55857	2.57031	2.56074
1579.28	2.59054	2.59433	2.60273	2.57504	2.58442	2.59361	2.59398	2.58938	2.57816	2.62199	2.60737	2.6051	2.60348	2.57386	2.5836	2.5672	2.58237	2.56903	2.55527	2.57502	2.60613	2.59414	2.57919	2.58013	2.59306	2.60227	2.57282	2.58656	2.58406	2.58717	2.58874	2.56984	2.54796	2.56127	2.55772	2.5853	2.60302	2.57699	2.58881	2.57907
1578.28	2.60917	2.61337	2.62144	2.59363	2.60326	2.61238	2.6128	2.60813	2.59681	2.64081	2.62631	2.62416	2.62261	2.59276	2.60231	2.58604	2.60121	2.58803	2.57431	2.59364	2.62585	2.6131	2.59808	2.59907	2.61261	2.62111	2.59193	2.60538	2.60275	2.60643	2.60805	2.58833	2.56641	2.57987	2.57618	2.60442	2.62237	2.59572	2.60766	2.59782
1577.29	2.62811	2.6327	2.64048	2.6126	2.62238	2.63149	2.632	2.62713	2.61573	2.65993	2.64567	2.64367	2.64198	2.61185	2.62122	2.60518	2.62043	2.60742	2.59372	2.61263	2.64599	2.63239	2.6173	2.61822	2.63248	2.64039	2.6114	2.62454	2.62194	2.62594	2.62771	2.60703	2.58517	2.59878	2.59489	2.62384	2.64217	2.61472	2.62678	2.61704
1576.29	2.64744	2.65234	2.65982	2.63193	2.64185	2.65102	2.65143	2.64647	2.63488	2.67944	2.66547	2.66343	2.66151	2.63129	2.6404	2.62473	2.63999	2.6271	2.6135	2.63197	2.66644	2.65198	2.63677	2.63763	2.65273	2.66017	2.63122	2.64399	2.64142	2.64583	2.64783	2.62607	2.60436	2.61808	2.61406	2.64366	2.66246	2.63406	2.64613	2.63677
1575.3	2.6671	2.67223	2.67948	2.65149	2.66153	2.6708	2.67126	2.6664	2.65423	2.69911	2.68566	2.68341	2.68138	2.65108	2.65994	2.64472	2.66001	2.6471	2.63358	2.65161	2.6871	2.67182	2.65653	2.65743	2.67341	2.68036	2.65137	2.66365	2.66108	2.66619	2.66831	2.64555	2.62398	2.63781	2.63366	2.66386	2.68321	2.65385	2.66578	2.65676
1574.31	2.68705	2.69248	2.69937	2.67147	2.68149	2.69086	2.69142	2.68687	2.67388	2.71902	2.7061	2.70361	2.70169	2.67139	2.67992	2.66519	2.68052	2.6673	2.65391	2.67159	2.7081	2.69183	2.67671	2.67762	2.69455	2.7008	2.67179	2.68374	2.68091	2.68702	2.68926	2.66557	2.64402	2.65785	2.65377	2.6845	2.7042	2.67408	2.68582	2.6769
1573.32	2.70727	2.71296	2.71956	2.69177	2.70175	2.71118	2.71188	2.70792	2.69388	2.73931	2.72667	2.72406	2.72255	2.69215	2.70039	2.68604	2.7016	2.68787	2.67459	2.69186	2.72953	2.71218	2.69724	2.69825	2.71606	2.72144	2.6924	2.70424	2.70107	2.70829	2.71045	2.68605	2.66425	2.67823	2.67422	2.70561	2.72533	2.69477	2.70629	2.69711
1572.33	2.7278	2.73373	2.7401	2.71244	2.72247	2.73193	2.73267	2.72931	2.71423	2.76011	2.7476	2.74486	2.74375	2.71302	2.72122	2.70711	2.7231	2.70878	2.69575	2.71242	2.75162	2.73292	2.71804	2.71943	2.73801	2.74239	2.71322	2.72507	2.7216	2.72992	2.73206	2.7068	2.68483	2.6989	2.69487	2.72697	2.7466	2.71587	2.72713	2.71755
1571.34	2.74872	2.75477	2.76101	2.73342	2.74358	2.75302	2.7537	2.75093	2.73476	2.78147	2.76893	2.76609	2.76524	2.73409	2.74233	2.72843	2.74485	2.73002	2.71738	2.73319	2.77418	2.75399	2.73906	2.74108	2.7604	2.76376	2.73452	2.7463	2.74255	2.75195	2.75413	2.72778	2.70572	2.71993	2.71586	2.7487	2.7683	2.73726	2.74816	2.73835
1570.35	2.77004	2.77628	2.78228	2.75469	2.76517	2.7745	2.77524	2.77278	2.75569	2.80327	2.79076	2.78776	2.78691	2.75538	2.76355	2.75016	2.76667	2.7517	2.73939	2.75433	2.79715	2.77543	2.76038	2.76306	2.78326	2.78554	2.75633	2.76782	2.76375	2.77437	2.77677	2.74895	2.72705	2.74131	2.73716	2.77085	2.79076	2.759	2.76946	2.7596
1569.37	2.79176	2.79828	2.80386	2.77622	2.7871	2.79617	2.79731	2.79493	2.77713	2.82521	2.81295	2.80972	2.80876	2.77693	2.78507	2.77245	2.78874	2.77391	2.76188	2.77586	2.82043	2.79718	2.78202	2.78517	2.80651	2.80761	2.7786	2.78969	2.78518	2.79723	2.79964	2.77038	2.74879	2.76298	2.75872	2.7935	2.81409	2.78093	2.79104	2.78126
1568.38	2.81385	2.82082	2.8259	2.79816	2.80937	2.81809	2.81978	2.81738	2.79899	2.84722	2.83533	2.83211	2.83094	2.79872	2.80693	2.7952	2.81121	2.79663	2.78466	2.79793	2.84415	2.81931	2.804	2.80744	2.83007	2.82998	2.80126	2.81183	2.80697	2.82077	2.82273	2.79233	2.77084	2.78501	2.78047	2.81664	2.83804	2.80307	2.81293	2.80334
1567.4	2.83631	2.84366	2.84834	2.82056	2.83181	2.84034	2.84256	2.84017	2.82131	2.86965	2.85801	2.85483	2.85347	2.82094	2.82939	2.81829	2.83432	2.81975	2.80767	2.82049	2.86833	2.8419	2.82623	2.82996	2.85391	2.85269	2.82425	2.83421	2.82902	2.84493	2.84606	2.81477	2.79314	2.8074	2.80251	2.84037	2.86213	2.82559	2.83528	2.82577
1566.42	2.85928	2.86662	2.87114	2.84332	2.85455	2.86322	2.86561	2.86342	2.84358	2.89258	2.88101	2.8779	2.87634	2.84365	2.85247	2.84165	2.85801	2.84322	2.83088	2.84342	2.89322	2.86482	2.84887	2.85274	2.87826	2.87588	2.84766	2.85703	2.85138	2.8697	2.87001	2.83752	2.81575	2.83022	2.8249	2.86472	2.8862	2.84858	2.85809	2.84849
1565.44	2.88239	2.88958	2.89398	2.86644	2.87778	2.8867	2.88902	2.88712	2.86596	2.91601	2.90432	2.90128	2.89955	2.86704	2.87606	2.86545	2.88204	2.86695	2.85455	2.86684	2.91863	2.88804	2.87202	2.87591	2.90316	2.89942	2.87158	2.88032	2.87434	2.89478	2.89489	2.86068	2.83872	2.85346	2.8478	2.88956	2.91044	2.87203	2.88151	2.87147
1564.46	2.90572	2.91281	2.9171	2.88987	2.90146	2.91083	2.91283	2.91121	2.88859	2.93968	2.92817	2.92493	2.9232	2.89056	2.89997	2.8898	2.90638	2.89105	2.87872	2.89054	2.94448	2.91157	2.89536	2.89951	2.92853	2.92328	2.89592	2.90398	2.89762	2.92019	2.9206	2.88423	2.86222	2.8769	2.87119	2.91487	2.93517	2.89586	2.90544	2.89464
1563.48	2.92935	2.93681	2.94063	2.91369	2.92546	2.93535	2.93702	2.93565	2.91174	2.96333	2.95236	2.94896	2.94719	2.9141	2.92415	2.91471	2.93101	2.91584	2.90358	2.91439	2.97064	2.93519	2.91884	2.92356	2.95422	2.94746	2.92055	2.92807	2.92141	2.94632	2.94689	2.90813	2.88602	2.90072	2.89499	2.94055	2.96057	2.91994	2.92971	2.91822
1562.5	2.9533	2.96155	2.96462	2.93785	2.94978	2.96005	2.96153	2.96074	2.93552	2.98714	2.97694	2.97315	2.97159	2.93773	2.94885	2.94005	2.95617	2.94106	2.929	2.93862	2.99719	2.95923	2.94282	2.948	2.9804	2.97182	2.94556	2.95253	2.94534	2.97354	2.97336	2.93237	2.91016	2.92509	2.91905	2.96671	2.98638	2.94435	2.95425	2.94201
1561.52	2.9779	2.9868	2.98928	2.96214	2.97448	2.98505	2.9865	2.98611	2.95976	3.01136	3.00174	2.99765	2.9965	2.96202	2.97388	2.96553	2.98189	2.96674	2.95464	2.96314	3.02403	2.98373	2.96755	2.97273	3.0071	2.99665	2.97074	2.97745	2.96954	3.00192	3.00043	2.95689	2.93441	2.94995	2.94344	2.99359	3.01259	2.96914	2.97904	2.96632
1560.55	3.00331	3.01248	3.01446	2.98669	2.99938	3.01034	3.01199	3.01207	2.98445	3.03594	3.02684	3.02253	3.02171	2.987	2.99936	2.99128	3.00818	2.99289	2.98075	2.98777	3.05137	3.00855	2.9929	2.99759	3.03426	3.02201	2.99633	3.0029	2.99392	3.03088	3.02824	2.98174	2.95899	2.97539	2.96822	3.021	3.03901	2.9943	3.00407	2.99111
1559.58	3.02937	3.03847	3.04004	3.01201	3.02464	3.03576	3.03819	3.03829	3.00925	3.06119	3.0521	3.04803	3.04701	3.01259	3.02535	3.0174	3.0348	3.01936	3.00747	3.01246	3.07916	3.03378	3.01848	3.02286	3.06187	3.04806	3.02241	3.02881	3.01873	3.06045	3.05666	3.00694	2.98393	3.0012	2.99316	3.04902	3.06583	3.02004	3.02949	3.01636
1558.6	3.05613	3.06463	3.06593	3.03819	3.05028	3.06163	3.06505	3.06506	3.03374	3.08646	3.07794	3.07404	3.07249	3.03835	3.05183	3.04434	3.06172	3.04615	3.03491	3.03743	3.10731	3.05923	3.04394	3.04883	3.08973	3.07472	3.04923	3.05492	3.044	3.09047	3.08569	3.03242	3.00923	3.02729	3.01864	3.07786	3.09328	3.04618	3.05514	3.0419
1557.63	3.08324	3.09122	3.09191	3.06492	3.07644	3.08806	3.09229	3.09219	3.05789	3.11181	3.10442	3.10061	3.09829	3.06421	3.07886	3.07188	3.08904	3.07332	3.06303	3.06276	3.13608	3.085	3.06942	3.07531	3.11747	3.10199	3.07627	3.08107	3.06982	3.12103	3.11553	3.05809	3.03505	3.05376	3.04473	3.10756	3.12102	3.07259	3.0812	3.06797
1556.66	3.11055	3.1183	3.11826	3.09179	3.10306	3.11552	3.11964	3.11998	3.08172	3.13742	3.1315	3.1272	3.12466	3.09032	3.10593	3.09985	3.11727	3.10087	3.09149	3.08895	3.16562	3.11108	3.09508	3.10236	3.14542	3.12941	3.10369	3.10742	3.09594	3.15229	3.14627	3.0845	3.06126	3.08044	3.07141	3.13791	3.14918	3.09915	3.10776	3.09461
1555.69	3.13779	3.14602	3.14527	3.11852	3.13019	3.14372	3.1471	3.14804	3.10601	3.16351	3.15877	3.15406	3.15157	3.11658	3.13335	3.12827	3.14637	3.12899	3.12008	3.11591	3.19639	3.13709	3.12114	3.12944	3.17357	3.15696	3.13121	3.13398	3.12266	3.18496	3.17802	3.1113	3.08801	3.1073	3.09841	3.16884	3.17791	3.1259	3.13525	3.12212
1554.73	3.16531	3.17416	3.1727	3.14527	3.15776	3.17217	3.17505	3.17652	3.13119	3.19015	3.18608	3.18142	3.17853	3.14314	3.16116	3.15721	3.17598	3.15754	3.14883	3.14336	3.22828	3.1632	3.14753	3.15663	3.20226	3.18448	3.15914	3.16139	3.14984	3.21942	3.21056	3.13874	3.1155	3.13436	3.1258	3.20031	3.20722	3.15283	3.16364	3.15
1553.76	3.1936	3.20255	3.20048	3.17238	3.18558	3.20047	3.20367	3.2058	3.15701	3.21727	3.21388	3.20935	3.20544	3.17005	3.18965	3.18689	3.20592	3.18692	3.17825	3.17111	3.2606	3.18938	3.17458	3.18416	3.23124	3.21246	3.18767	3.18987	3.17745	3.25576	3.24353	3.16669	3.14354	3.1621	3.15351	3.23293	3.23706	3.18036	3.19258	3.17808
1552.8	3.22311	3.23162	3.22854	3.20036	3.21407	3.22847	3.23296	3.23579	3.18293	3.24457	3.24207	3.23738	3.2324	3.1977	3.21884	3.21734	3.23597	3.21724	3.20869	3.19868	3.29291	3.21605	3.20227	3.2127	3.26029	3.24116	3.21697	3.21929	3.20527	3.29374	3.2768	3.19536	3.17222	3.19037	3.18151	3.26692	3.26706	3.20848	3.22164	3.2058
1551.83	3.2535	3.26122	3.25726	3.2292	3.24284	3.25659	3.26284	3.26635	3.2088	3.27222	3.27061	3.26522	3.25944	3.22645	3.24835	3.2488	3.26685	3.24848	3.24015	3.22627	3.32529	3.24324	3.23016	3.24156	3.28997	3.27047	3.247	3.24953	3.23331	3.33214	3.31083	3.22393	3.20129	3.21905	3.20969	3.30221	3.29656	3.2379	3.25113	3.23361
1550.87	3.28477	3.29161	3.28623	3.25878	3.27189	3.28516	3.29326	3.29752	3.23459	3.2995	3.29936	3.29309	3.2871	3.25609	3.27789	3.28095	3.29852	3.28062	3.27244	3.25392	3.35721	3.27107	3.25802	3.27025	3.31947	3.2998	3.2777	3.28043	3.26157	3.37133	3.34561	3.25225	3.23099	3.24822	3.23843	3.33838	3.32595	3.26836	3.28094	3.26187
1549.91	3.31641	3.32277	3.31526	3.28863	3.30114	3.31481	3.32415	3.32928	3.26046	3.32699	3.3275	3.32104	3.31624	3.28571	3.30826	3.31399	3.33068	3.31341	3.30549	3.2815	3.38935	3.2989	3.28606	3.29856	3.34921	3.32911	3.30845	3.31141	3.2895	3.41125	3.38126	3.28086	3.26119	3.27843	3.26734	3.37491	3.35559	3.29958	3.31136	3.29068
1548.95	3.34862	3.35428	3.34475	3.31861	3.33098	3.34506	3.35496	3.36139	3.28623	3.35497	3.35586	3.34972	3.34666	3.31413	3.33995	3.34751	3.36296	3.34693	3.33877	3.30964	3.42161	3.32669	3.31421	3.32681	3.3788	3.35934	3.33904	3.34246	3.31791	3.45248	3.41791	3.31024	3.29185	3.30963	3.29705	3.4122	3.38573	3.33066	3.34271	3.32028
1547.99	3.38131	3.38628	3.37434	3.34875	3.36125	3.37561	3.38576	3.39292	3.31251	3.38376	3.3847	3.3787	3.37748	3.34215	3.37296	3.38191	3.39509	3.38155	3.37276	3.3382	3.45447	3.35488	3.34255	3.35564	3.40775	3.39037	3.36972	3.3741	3.34641	3.4954	3.45559	3.34072	3.32241	3.34141	3.32739	3.45012	3.41598	3.36152	3.3748	3.35019
1547.03	3.41444	3.41894	3.40489	3.37955	3.39219	3.40639	3.41667	3.42426	3.33893	3.41379	3.41464	3.40832	3.40772	3.37075	3.4064	3.41663	3.42811	3.41705	3.40775	3.36766	3.48855	3.38351	3.37128	3.38465	3.43653	3.42205	3.4009	3.40707	3.37574	3.54022	3.49545	3.37217	3.35245	3.37317	3.35812	3.48935	3.44658	3.39178	3.40736	3.38074
1546.07	3.44839	3.45242	3.43603	3.41098	3.42394	3.43754	3.44873	3.45685	3.3664	3.44398	3.4453	3.43806	3.43756	3.40103	3.44009	3.45185	3.46253	3.45366	3.44394	3.39746	3.52364	3.41248	3.40018	3.41367	3.46517	3.45418	3.43425	3.44194	3.40629	3.58786	3.53636	3.4039	3.3828	3.40486	3.38871	3.52945	3.47681	3.42168	3.44015	3.41165
1545.12	3.48272	3.48699	3.46835	3.44223	3.45564	3.46972	3.48199	3.49065	3.39449	3.47349	3.47667	3.46834	3.46772	3.43167	3.47382	3.48775	3.49907	3.49105	3.48124	3.42708	3.55941	3.44167	3.42917	3.44255	3.49314	3.48615	3.46919	3.47814	3.43798	3.63839	3.57877	3.43667	3.41482	3.43684	3.41928	3.57076	3.50699	3.45123	3.47299	3.44295
1544.16	3.51783	3.52218	3.50109	3.47422	3.4877	3.50276	3.5161	3.52559	3.42234	3.50308	3.50862	3.49839	3.49852	3.46208	3.5084	3.52495	3.53732	3.52878	3.52014	3.45663	3.59618	3.47013	3.45864	3.47112	3.5207	3.5178	3.50531	3.51484	3.47123	3.69266	3.62121	3.47042	3.44803	3.46978	3.44995	3.61164	3.5362	3.48133	3.50609	3.47387
1543.21	3.55306	3.55782	3.53327	3.50652	3.51968	3.53448	3.55117	3.5606	3.44922	3.53236	3.54099	3.52895	3.52969	3.49133	3.54399	3.564	3.57656	3.56638	3.55938	3.48697	3.63293	3.4987	3.48854	3.49967	3.54786	3.54923	3.54108	3.55155	3.50563	3.74911	3.66333	3.50456	3.48257	3.50329	3.48192	3.6515	3.56514	3.51236	3.53919	3.5039
1542.26	3.58906	3.59341	3.56441	3.53967	3.55154	3.56533	3.58637	3.59412	3.47587	3.56237	3.5727	3.56039	3.56084	3.52069	3.57987	3.60468	3.61619	3.60403	3.60018	3.51766	3.67062	3.5281	3.51868	3.52819	3.57511	3.58085	3.57674	3.58788	3.54056	3.80684	3.70499	3.53865	3.51785	3.53761	3.51476	3.69117	3.59393	3.54411	3.57295	3.53334
1541.31	3.62614	3.6291	3.59586	3.5722	3.58285	3.59591	3.62047	3.62635	3.50255	3.59311	3.60357	3.59366	3.59197	3.5504	3.61495	3.64637	3.65662	3.64328	3.64145	3.5488	3.70984	3.55812	3.54825	3.55767	3.60309	3.61381	3.61211	3.62388	3.57518	3.86463	3.74493	3.57415	3.55395	3.57136	3.54864	3.73172	3.62296	3.57643	3.60797	3.56281
1540.36	3.66377	3.66437	3.62708	3.60435	3.61415	3.6274	3.65214	3.65843	3.52927	3.62375	3.63347	3.62772	3.62324	3.58141	3.65055	3.68876	3.69882	3.68461	3.68313	3.57947	3.74984	3.58754	3.57833	3.58844	3.63082	3.64857	3.6478	3.66097	3.60972	3.92304	3.78541	3.61081	3.59001	3.60539	3.58204	3.77219	3.65256	3.60901	3.64379	3.5924
1539.41	3.7002	3.70119	3.65944	3.63537	3.64422	3.65962	3.68313	3.69111	3.55606	3.65409	3.66446	3.66066	3.6554	3.61246	3.68709	3.73171	3.74225	3.72894	3.72548	3.61064	3.7891	3.61584	3.60868	3.61977	3.65675	3.68498	3.68356	3.69957	3.64351	3.97962	3.82597	3.64802	3.62553	3.6389	3.61502	3.81339	3.6814	3.64128	3.68053	3.62305
1538.46	3.73601	3.74107	3.69144	3.66718	3.67515	3.69214	3.71428	3.72528	3.58268	3.68417	3.69692	3.6929	3.68905	3.64433	3.72482	3.77647	3.78827	3.77481	3.7686	3.6414	3.82736	3.64501	3.64006	3.65038	3.68081	3.72085	3.7209	3.73907	3.67671	4.03689	3.86625	3.68531	3.66054	3.67295	3.64756	3.85311	3.70897	3.67396	3.71561	3.65361
1537.52	3.77101	3.78368	3.72242	3.69916	3.70777	3.72527	3.74797	3.76037	3.60903	3.71314	3.73041	3.72508	3.7227	3.67837	3.76353	3.82283	3.83609	3.82094	3.81388	3.67255	3.86471	3.67533	3.67158	3.67881	3.70255	3.75537	3.75943	3.77904	3.71035	4.09428	3.90706	3.72245	3.69535	3.70878	3.68107	3.88928	3.73536	3.7059	3.75017	3.68449
1536.57	3.80539	3.82625	3.75481	3.73149	3.74083	3.75748	3.78314	3.79574	3.6348	3.74242	3.76411	3.757	3.75609	3.71413	3.80234	3.87181	3.8855	3.86744	3.86065	3.70319	3.90399	3.70676	3.70368	3.7062	3.72442	3.78751	3.79836	3.81953	3.74485	4.15453	3.94548	3.76265	3.73113	3.7461	3.71573	3.91992	3.76162	3.7386	3.78456	3.7162
1535.63	3.83989	3.86833	3.78803	3.76337	3.77219	3.7886	3.81782	3.82931	3.6606	3.7711	3.79852	3.78878	3.78896	3.75017	3.83863	3.92394	3.93603	3.91623	3.9085	3.73369	3.94445	3.73846	3.73538	3.73317	3.74618	3.82132	3.83582	3.86116	3.78153	4.21594	3.98056	3.80662	3.76734	3.78378	3.75134	3.94643	3.78896	3.77235	3.81958	3.74756
1534.68	3.87402	3.90756	3.82061	3.79416	3.80261	3.81837	3.85039	3.86202	3.68548	3.80051	3.83503	3.82152	3.82207	3.78386	3.87394	3.97944	3.98862	3.96727	3.95742	3.76373	3.98577	3.76891	3.76671	3.76179	3.7691	3.85692	3.87273	3.90346	3.81929	4.27669	4.00994	3.85125	3.80433	3.81979	3.78747	3.96839	3.81554	3.80757	3.85378	3.77843
1533.74	3.90659	3.94676	3.85284	3.82529	3.8309	3.8482	3.88189	3.89432	3.71074	3.83066	3.87321	3.85569	3.85423	3.81579	3.90823	4.03909	4.04371	4.02053	4.00627	3.79374	4.02797	3.79902	3.79663	3.79025	3.79298	3.89295	3.91259	3.9445	3.85607	4.3288	4.03772	3.89689	3.84193	3.8548	3.82176	3.98752	3.84072	3.84339	3.88662	3.80933
1532.8	3.93749	3.98794	3.88323	3.85681	3.85883	3.87872	3.9117	3.92649	3.73493	3.86292	3.90944	3.89236	3.88722	3.84746	3.9418	4.1004	4.10377	4.07591	4.05743	3.82285	4.07144	3.82742	3.82542	3.81603	3.81606	3.92854	3.95556	3.9853	3.88913	4.37398	4.06629	3.94108	3.87833	3.89004	3.8557	4.00233	3.86274	3.8786	3.91916	3.84016
1531.86	3.96628	4.02909	3.91357	3.8886	3.88307	3.90922	3.94217	3.95653	3.75882	3.89583	3.9432	3.93091	3.91894	3.88098	3.97557	4.15918	4.16537	4.12972	4.10931	3.85294	4.11533	3.85545	3.85302	3.83636	3.83487	3.96316	4.0003	4.0258	3.92142	4.41498	4.09465	3.98645	3.91495	3.92755	3.8898	4.0124	3.88345	3.91178	3.95256	3.8704
1530.92	3.98985	4.06981	3.94263	3.92093	3.90655	3.9397	3.97088	3.98587	3.78151	3.92642	3.97552	3.96823	3.95144	3.9158	4.01087	4.21408	4.22894	4.18074	4.16527	3.88357	4.15813	3.88156	3.88161	3.85457	3.84952	3.9979	4.04302	4.06692	3.95399	4.45499	4.11875	4.03418	3.95089	3.96645	3.92541	4.01593	3.90283	3.94084	3.98549	3.90111
1529.99	4.00878	4.10963	3.97106	3.95043	3.93058	3.96878	3.99914	4.01271	3.80358	3.95648	4.00846	4.00137	3.9848	3.94991	4.04627	4.27151	4.29455	4.23177	4.21852	3.91522	4.19804	3.90887	3.90938	3.87311	3.8612	4.03389	4.08494	4.10878	3.98981	4.48907	4.13955	4.08407	3.98606	4.00483	3.96036	4.01734	3.92176	3.96933	4.01622	3.93166
1529.05	4.02083	4.14994	3.99868	3.97709	3.95667	3.99673	4.02884	4.03637	3.82559	3.98783	4.03993	4.03338	4.01873	3.98014	4.07807	4.33906	4.35859	4.28316	4.267	3.94552	4.23837	3.93723	3.93831	3.89509	3.8733	4.0676	4.12762	4.14823	4.02797	4.51115	4.15146	4.13453	4.02127	4.03793	3.99241	4.01531	3.93837	3.99697	4.04405	3.96175
1528.12	4.02807	4.18927	4.02522	4.00359	3.98268	4.02061	4.06057	4.06054	3.84575	4.02061	4.07138	4.0623	4.05058	4.00756	4.10348	4.42528	4.42733	4.33851	4.30514	3.97213	4.27797	3.96504	3.96768	3.91679	3.88487	4.10084	4.16859	4.18873	4.06505	4.51629	4.15905	4.18325	4.05568	4.06765	4.02398	4.00989	3.95044	4.02567	4.06685	3.98843
1527.18	4.03394	4.23034	4.05188	4.0304	4.00749	4.04164	4.09147	4.08312	3.86348	4.05306	4.09741	4.08846	4.0789	4.03436	4.12157	4.52795	4.5019	4.39615	4.33751	3.9932	4.32457	3.99271	3.99743	3.93554	3.89308	4.1327	4.20644	4.23029	4.09995	4.49712	4.16363	4.23126	4.09034	4.0936	4.05493	4.00143	3.95884	4.05428	4.08697	4.01256
1526.25	4.0378	4.27706	4.07851	4.05875	4.02752	4.06155	4.11485	4.104	3.87756	4.08043	4.12519	4.11364	4.1066	4.06255	4.13735	4.64132	4.58374	4.45867	4.36788	4.01315	4.36872	4.01693	4.02603	3.94826	3.90024	4.1625	4.2393	4.27234	4.13597	4.46575	4.1648	4.27911	4.12698	4.11781	4.08656	3.99027	3.96626	4.08539	4.10598	4.03631
1525.32	4.04033	4.32318	4.10507	4.08027	4.04619	4.08109	4.13188	4.12194	3.89252	4.10181	4.15409	4.13972	4.13445	4.09055	4.15371	4.73177	4.68754	4.51559	4.39354	4.03375	4.41003	4.03846	4.05181	3.95693	3.91146	4.18895	4.27171	4.31554	4.17138	4.43059	4.16127	4.32755	4.16647	4.14459	4.11337	3.97697	3.97408	4.11316	4.1248	4.0603
1524.39	4.04237	4.36536	4.12829	4.09624	4.06535	4.09979	4.14619	4.13814	3.90932	4.12074	4.18508	4.16712	4.16267	4.11891	4.17073	4.79714	4.78671	4.57217	4.41152	4.05509	4.45247	4.0591	4.07623	3.9664	3.92503	4.21213	4.30591	4.35528	4.20782	4.3936	4.15704	4.37371	4.20109	4.17386	4.13752	3.96136	3.98132	4.13594	4.13999	4.08221
1523.46	4.04207	4.39937	4.15067	4.11002	4.08462	4.11885	4.16124	4.14987	3.9272	4.13689	4.21835	4.19739	4.19457	4.14525	4.18212	4.86941	4.86601	4.61652	4.42499	4.07907	4.49161	4.08037	4.10103	3.97534	3.93665	4.23086	4.33853	4.38567	4.24087	4.35472	4.14869	4.41516	4.23334	4.20348	4.15728	3.94657	3.98706	4.15279	4.15418	4.10187
1522.53	4.04069	4.42744	4.17106	4.12576	4.10248	4.1365	4.17868	4.163	3.94293	4.15214	4.24996	4.22702	4.22357	4.17115	4.18739	4.94448	4.91278	4.64075	4.43316	4.10137	4.53747	4.10135	4.12785	3.98345	3.94074	4.24527	4.37173	4.40406	4.27297	4.31881	4.1413	4.44797	4.25786	4.22366	4.17523	3.93312	3.98761	4.16603	4.16287	4.11898
1521.61	4.03408	4.44784	4.18974	4.14303	4.11667	4.15035	4.19401	4.17488	3.95467	4.16522	4.27812	4.25449	4.24919	4.19682	4.18636	5.00234	4.9318	4.64565	4.43234	4.12114	4.5977	4.12149	4.1599	3.98838	3.93764	4.25818	4.40074	4.41458	4.30001	4.28563	4.13367	4.47338	4.27494	4.23658	4.19123	3.92047	3.98475	4.17707	4.16758	4.13369
1520.68	4.02529	4.46146	4.2089	4.1577	4.12884	4.1605	4.20232	4.18744	3.96433	4.17501	4.30007	4.2783	4.26989	4.22106	4.18062	4.95859	4.94047	4.63532	4.42903	4.13952	4.52092	4.14048	4.19272	3.98737	3.93297	4.27192	4.42279	4.42257	4.32292	4.25596	4.12392	4.49281	4.28719	4.24291	4.20381	3.90514	3.98053	4.19135	4.16618	4.14386
1519.76	4.0149	4.47016	4.2258	4.16786	4.13917	4.1646	4.20663	4.19627	3.97109	4.18377	4.31187	4.29532	4.28482	4.24335	4.17543	4.89705	4.96457	4.63006	4.4236	4.15619	4.50938	4.15644	4.22161	3.98466	3.93014	4.27883	4.43733	4.43153	4.33595	4.22512	4.10994	4.52197	4.29537	4.24781	4.21624	3.88699	3.97656	4.20182	4.15939	4.14604
1518.83	4.00082	4.47238	4.23804	4.17616	4.14874	4.16355	4.20675	4.20406	3.97739	4.19409	4.31602	4.30944	4.29838	4.26841	4.16738	4.87258	4.98471	4.62049	4.41629	4.16806	4.49133	4.17159	4.24418	3.98136	3.92925	4.27884	4.45001	4.43301	4.33764	4.19139	4.09472	4.55474	4.30183	4.25342	4.2281	3.86841	3.97231	4.21047	4.15006	4.14329
1517.91	3.98601	4.46964	4.2459	4.18459	4.15518	4.16371	4.20329	4.20957	3.9813	4.2104	4.32102	4.32539	4.31482	4.28929	4.15436	4.87923	4.99081	4.60466	4.4017	4.17678	4.54814	4.18084	4.25892	3.97923	3.92801	4.27431	4.45878	4.42892	4.32984	4.15717	4.0812	4.59232	4.30481	4.2535	4.23943	3.84942	3.97129	4.21623	4.14238	4.139
1516.99	3.9683	4.45694	4.24642	4.18974	4.15833	4.16628	4.19715	4.21143	3.98543	4.22827	4.33031	4.34244	4.32798	4.30548	4.13844	4.88131	4.90623	4.5737	4.37745	4.18217	4.52003	4.18713	4.27197	3.97769	3.92626	4.2684	4.45732	4.41497	4.31682	4.12453	4.06792	4.61418	4.30372	4.24616	4.24706	3.83126	3.97171	4.22528	4.13273	4.13188
1516.07	3.94896	4.43559	4.24872	4.1918	4.15842	4.16954	4.18877	4.2071	3.98724	4.24407	4.33893	4.35857	4.33915	4.31546	4.12356	4.82895	4.92303	4.54053	4.34451	4.18517	4.50157	4.18757	4.28292	3.97575	3.92347	4.26169	4.44391	4.39171	4.3099	4.09365	4.05537	4.61103	4.30423	4.23465	4.25214	3.81345	3.97443	4.22951	4.11867	4.12475
1515.15	3.93039	4.40936	4.2552	4.18586	4.15578	4.16902	4.18368	4.19694	3.98716	4.25227	4.35109	4.37271	4.34755	4.32328	4.11175	4.76409	4.81625	4.51011	4.31093	4.19064	4.4983	4.18837	4.29196	3.97485	3.92002	4.25336	4.42521	4.3705	4.30464	4.06591	4.04477	4.59791	4.30543	4.22474	4.2543	3.79683	3.97649	4.22501	4.10167	4.11857
1514.23	3.91353	4.38855	4.2658	4.17327	4.14837	4.16408	4.18063	4.18445	3.98427	4.25203	4.36309	4.37945	4.35085	4.33226	4.10347	4.7037	4.73499	4.47867	4.2803	4.19443	4.4881	4.18521	4.29785	3.97041	3.91585	4.24359	4.40591	4.35263	4.30051	4.04115	4.03509	4.57808	4.30253	4.22027	4.25933	3.78134	3.97769	4.21023	4.08257	4.11286
1513.32	3.8987	4.36941	4.26877	4.16046	4.1396	4.15545	4.17672	4.17303	3.97893	4.24992	4.37202	4.3846	4.35178	4.33855	4.09524	4.65682	4.66099	4.44631	4.25009	4.19771	4.4683	4.18349	4.30282	3.96309	3.91234	4.23399	4.38773	4.34017	4.29809	4.01896	4.02525	4.55881	4.2984	4.2165	4.25762	3.76752	3.97508	4.19437	4.06637	4.1063
1512.4	3.88426	4.35143	4.26252	4.1466	4.13333	4.14634	4.16704	4.16373	3.97476	4.24703	4.37985	4.38551	4.3491	4.33995	4.083	4.60996	4.59394	4.41048	4.21683	4.19955	4.44852	4.17633	4.30383	3.95432	3.9101	4.22297	4.36675	4.31993	4.28769	4.00083	4.01265	4.54272	4.2935	4.21205	4.25471	3.75417	3.96951	4.18007	4.0525	4.09679
1511.49	3.86991	4.33	4.24576	4.13431	4.12768	4.13925	4.15436	4.15311	3.969	4.24853	4.38636	4.38235	4.34887	4.33174	4.06297	4.56015	4.54219	4.37386	4.18624	4.1948	4.43617	4.16832	4.30797	3.94744	3.90715	4.20727	4.34518	4.29419	4.27	3.98309	3.99723	4.52198	4.28638	4.20356	4.247	3.74201	3.96205	4.16996	4.04038	4.08208
1510.57	3.85692	4.30664	4.2239	4.12442	4.12135	4.13521	4.14037	4.14072	3.96531	4.25079	4.38378	4.37524	4.34497	4.32033	4.04089	4.51637	4.50117	4.33824	4.15932	4.18195	4.4281	4.15692	4.3086	3.94104	3.90247	4.18874	4.32286	4.26558	4.24787	3.9647	3.98203	4.49234	4.27125	4.19018	4.23511	3.72859	3.95235	4.16364	4.02757	4.06574
1509.66	3.8438	4.28405	4.20392	4.11414	4.11092	4.1303	4.12524	4.12556	3.96064	4.24894	4.37743	4.3697	4.3368	4.30962	4.02303	4.47733	4.46376	4.30459	4.1383	4.16733	4.40963	4.14632	4.30806	3.93315	3.89686	4.17119	4.29978	4.2387	4.23115	3.9449	3.96927	4.45834	4.25214	4.17171	4.22053	3.71515	3.94276	4.15752	4.01294	4.04432
1508.75	3.82979	4.26106	4.18757	4.10543	4.09923	4.12174	4.112	4.11342	3.95495	4.24059	4.36765	4.36476	4.31939	4.30524	4.00908	4.43577	4.43104	4.27398	4.1214	4.15455	4.38233	4.13639	4.30396	3.92163	3.89112	4.15025	4.27588	4.2159	4.21793	3.9258	3.95776	4.42986	4.234	4.15149	4.20612	3.70307	3.93327	4.14897	3.99467	4.02246
1507.84	3.81655	4.23532	4.17777	4.09445	4.08818	4.10918	4.09888	4.1037	3.94862	4.23107	4.35682	4.35402	4.30612	4.30691	3.99865	4.39339	4.39709	4.24772	4.10778	4.14957	4.35054	4.12812	4.29767	3.909	3.88625	4.1279	4.25221	4.19618	4.2044	3.90967	3.947	4.40238	4.22197	4.13436	4.19448	3.69203	3.92604	4.13503	3.97448	4.00153
1506.93	3.80312	4.20624	4.1709	4.08092	4.07661	4.09391	4.08744	4.0971	3.94068	4.21937	4.34614	4.3445	4.29024	4.30894	3.9871	4.35511	4.36259	4.22265	4.0892	4.1482	4.32176	4.12153	4.2908	3.8973	3.87965	4.10437	4.22531	4.17594	4.18592	3.8965	3.9335	4.37383	4.20477	4.11887	4.18058	3.68244	3.91749	4.11635	3.9572	3.98387
1506.02	3.79022	4.17422	4.16623	4.06576	4.06298	4.07952	4.07606	4.08872	3.93435	4.20602	4.33592	4.33848	4.28297	4.30762	3.97549	4.31848	4.33227	4.19989	4.06736	4.14225	4.29169	4.11391	4.28127	3.88752	3.87343	4.08481	4.19634	4.15362	4.16322	3.88582	3.91849	4.34623	4.18252	4.10447	4.16227	3.67306	3.90856	4.09554	3.94054	3.96753
1505.12	3.77857	4.14386	4.1603	4.05	4.04896	4.06757	4.06234	4.07876	3.92863	4.18985	4.32713	4.3309	4.28125	4.29844	3.96376	4.28835	4.30404	4.17668	4.04334	4.12645	4.26883	4.10656	4.26755	3.88032	3.86532	4.0671	4.16706	4.13155	4.13997	3.87685	3.90319	4.32127	4.15718	4.08924	4.14157	3.6636	3.90051	4.07695	3.92597	3.9512
1504.21	3.76684	4.11339	4.14984	4.0354	4.03449	4.05945	4.04781	4.06648	3.92253	4.17537	4.31513	4.32208	4.28199	4.2827	3.95376	4.26204	4.27917	4.15488	4.0244	4.10583	4.25305	4.09652	4.25189	3.87477	3.85871	4.04818	4.13767	4.10942	4.12021	3.86596	3.89004	4.30246	4.1398	4.0717	4.12435	3.65437	3.89318	4.06011	3.90974	3.93165
1503.31	3.75558	4.0825	4.13339	4.02195	4.02054	4.05216	4.03377	4.05139	3.91341	4.16452	4.30329	4.30587	4.28058	4.26616	3.94369	4.2375	4.25553	4.13417	4.01026	4.08459	4.23571	4.08435	4.23383	3.86756	3.8535	4.02847	4.11077	4.08716	4.10306	3.8554	3.87768	4.28123	4.12367	4.0542	4.11253	3.64483	3.8851	4.04462	3.89177	3.90947
1502.4	3.74565	4.05364	4.11063	4.00785	4.0056	4.04384	4.02031	4.03436	3.90258	4.15903	4.289	4.28696	4.26925	4.2523	3.93239	4.21546	4.22939	4.11367	3.9971	4.06791	4.21816	4.06637	4.22114	3.8561	3.8476	4.00685	4.08688	4.06321	4.08619	3.84281	3.86605	4.24921	4.10813	4.03674	4.10044	3.63492	3.87427	4.02644	3.87414	3.8878
1501.5	3.73539	4.02823	4.09296	3.98993	3.99078	4.03467	4.00897	4.01654	3.89054	4.15769	4.27466	4.26607	4.2569	4.24735	3.92078	4.19013	4.20445	4.0926	3.98027	4.04946	4.20156	4.04504	4.21197	3.84265	3.84184	3.98812	4.06246	4.04018	4.06772	3.83086	3.85398	4.21341	4.09096	4.01963	4.0833	3.62413	3.86228	4.00507	3.85746	3.86882
1500.6	3.72541	4.01064	4.07727	3.96811	3.97711	4.02323	3.99886	4.00042	3.87812	4.15304	4.25918	4.24532	4.24209	4.24317	3.9087	4.16709	4.17859	4.07472	3.95984	4.02998	4.18314	4.02179	4.20322	3.82887	3.83631	3.97207	4.03722	4.01415	4.04598	3.81987	3.84295	4.17679	4.06935	4.00598	4.06414	3.61462	3.85017	3.9815	3.84351	3.85102
1499.7	3.71363	3.99486	4.06124	3.94531	3.96499	4.00824	3.98708	3.98718	3.86495	4.14289	4.24216	4.22356	4.22748	4.2313	3.89687	4.14356	4.15535	4.05914	3.94093	4.01044	4.16087	4.00337	4.18752	3.81745	3.83055	3.95684	4.01273	3.98463	4.02263	3.81039	3.83273	4.14505	4.04764	3.99358	4.04718	3.60697	3.84062	3.95709	3.8307	3.83467
1498.8	3.70173	3.97512	4.04697	3.92337	3.95291	3.99215	3.97565	3.97626	3.85319	4.12634	4.22408	4.20614	4.21373	4.21677	3.88462	4.12139	4.12995	4.04771	3.9247	3.9921	4.13746	3.98925	4.16516	3.808	3.82407	3.94082	3.9894	3.95491	4.00026	3.80021	3.82344	4.12013	4.02671	3.98146	4.03643	3.60044	3.83298	3.93574	3.81676	3.81644
1497.9	3.68975	3.95057	4.02996	3.90674	3.9415	3.97527	3.96081	3.96492	3.84141	4.10912	4.20431	4.19506	4.19582	4.19889	3.87221	4.10005	4.10433	4.03647	3.9098	3.97532	4.1148	3.97547	4.13769	3.79957	3.81689	3.92249	3.96857	3.93019	3.98024	3.78781	3.81223	4.09719	4.00595	3.96931	4.02867	3.59404	3.82642	3.9166	3.80188	3.79782
1497.01	3.67788	3.92517	4.01496	3.89405	3.9294	3.95723	3.9444	3.9529	3.83049	4.09743	4.18723	4.1875	4.17887	4.1826	3.85934	4.08024	4.08347	4.02215	3.89412	3.95972	4.09583	3.95709	4.11443	3.79142	3.80696	3.90213	3.94997	3.90968	3.96138	3.77486	3.79887	4.07636	3.98586	3.95322	4.01992	3.588	3.8188	3.89778	3.78752	3.77984
1496.11	3.66856	3.90422	3.99938	3.87968	3.91535	3.93978	3.92782	3.93894	3.8189	4.08756	4.17138	4.17855	4.16253	4.1663	3.84658	4.06122	4.06969	4.00446	3.87826	3.94481	4.0763	3.93503	4.0955	3.78228	3.7966	3.88061	3.92939	3.8914	3.94383	3.7644	3.78485	4.05642	3.9684	3.93322	4.00799	3.58145	3.81127	3.88061	3.77304	3.76199
1495.22	3.66159	3.88776	3.9829	3.8638	3.89956	3.92308	3.9132	3.92382	3.80651	4.07893	4.15626	4.16708	4.14451	4.14742	3.8339	4.04162	4.05847	3.98849	3.8638	3.93002	4.05712	3.91102	4.07451	3.77355	3.78789	3.85963	3.90591	3.87282	3.92302	3.75721	3.77245	4.03738	3.95224	3.91325	3.99382	3.57411	3.80287	3.86394	3.75702	3.74531
1494.32	3.65674	3.8706	3.96461	3.84513	3.88243	3.90804	3.89665	3.90811	3.79311	4.06782	4.14093	4.15343	4.12717	4.13059	3.82134	4.02373	4.04462	3.97544	3.85129	3.91507	4.03979	3.89079	4.04826	3.76543	3.78287	3.84158	3.88077	3.85337	3.90217	3.75136	3.76078	4.0173	3.93835	3.89713	3.97633	3.5663	3.7938	3.84889	3.74102	3.73004
1493.43	3.65161	3.85327	3.94782	3.82719	3.86572	3.89574	3.878	3.89047	3.78002	4.05529	4.12122	4.13521	4.10831	4.11307	3.80922	4.00964	4.02524	3.96302	3.84209	3.89843	4.02411	3.8729	4.02017	3.75536	3.7799	3.82492	3.85864	3.83264	3.87858	3.74479	3.74897	3.9966	3.92219	3.88593	3.95724	3.55791	3.78274	3.83425	3.72633	3.71521
1492.54	3.64497	3.83458	3.93177	3.81101	3.84965	3.88484	3.85957	3.87328	3.76903	4.04448	4.10207	4.11855	4.09281	4.09684	3.79751	3.99801	4.00428	3.94895	3.83369	3.8796	4.00869	3.85781	3.99526	3.74298	3.77387	3.80859	3.83956	3.81201	3.85958	3.73551	3.73585	3.97549	3.90245	3.87484	3.93958	3.55005	3.77117	3.81874	3.71199	3.7006
1491.65	3.63661	3.81576	3.91492	3.79475	3.83427	3.87406	3.84325	3.85826	3.75869	4.03554	4.08475	4.09803	4.0811	4.07923	3.78602	3.98574	3.98394	3.93361	3.8243	3.8599	3.99181	3.84313	3.97408	3.72998	3.76257	3.79081	3.8241	3.79158	3.84227	3.72497	3.72316	3.955	3.88356	3.86187	3.92605	3.54336	3.76017	3.80106	3.69807	3.68467
1490.76	3.6276	3.79468	3.89841	3.77854	3.82176	3.8611	3.82789	3.84297	3.74717	4.02224	4.06999	4.0809	4.0698	4.06339	3.77554	3.97053	3.96583	3.91511	3.81296	3.84074	3.97348	3.82506	3.95489	3.71946	3.74813	3.77462	3.80835	3.77332	3.82591	3.71467	3.71146	3.9328	3.86704	3.84618	3.91511	3.53726	3.74842	3.7825	3.68262	3.66818
1489.87	3.6192	3.77188	3.88391	3.76204	3.80938	3.84658	3.81392	3.82916	3.73392	4.0069	4.05743	4.06566	4.05774	4.04742	3.76431	3.95303	3.95122	3.8955	3.80033	3.82211	3.95345	3.80645	3.93554	3.71097	3.73497	3.75966	3.79352	3.75744	3.8085	3.70483	3.7001	3.90983	3.85165	3.83221	3.90268	3.53245	3.73625	3.76452	3.66622	3.65348
1488.98	3.61176	3.74867	3.87332	3.74583	3.79336	3.83052	3.80092	3.81476	3.72137	3.99196	4.04697	4.05077	4.04306	4.03355	3.75215	3.93524	3.93828	3.87926	3.78812	3.80427	3.93512	3.78689	3.91545	3.70253	3.72443	3.746	3.78026	3.74305	3.79095	3.6947	3.68778	3.88777	3.83601	3.81905	3.88583	3.52823	3.72387	3.74819	3.65143	3.64119
1488.1	3.60476	3.72857	3.86382	3.73112	3.77658	3.81316	3.78859	3.79987	3.70973	3.97675	4.035	4.03509	4.02746	4.01793	3.7394	3.91723	3.92489	3.86699	3.77767	3.78683	3.91762	3.77016	3.8951	3.69257	3.71662	3.73154	3.76619	3.72816	3.77334	3.68539	3.67529	3.8677	3.81813	3.80511	3.86498	3.524	3.71241	3.73233	3.63903	3.63081
1487.21	3.59702	3.71298	3.85271	3.71843	3.76075	3.79429	3.77568	3.78613	3.6998	3.96357	4.02166	4.01546	4.01195	4.00392	3.72631	3.90124	3.91186	3.85837	3.76783	3.77001	3.90392	3.75473	3.87458	3.68192	3.70936	3.71619	3.7521	3.7119	3.75664	3.67753	3.66362	3.85166	3.80028	3.79016	3.84579	3.51893	3.70225	3.71672	3.62834	3.62033
1486.33	3.58945	3.70139	3.83781	3.70792	3.7486	3.77796	3.76113	3.77229	3.6893	3.95157	4.00861	3.99721	3.99768	3.99167	3.71361	3.88695	3.89861	3.84897	3.75756	3.75459	3.88903	3.74071	3.85253	3.67123	3.70043	3.70007	3.73754	3.69522	3.74255	3.66953	3.65385	3.8384	3.78469	3.77436	3.82739	3.51336	3.69166	3.70088	3.61755	3.60858
1485.44	3.58283	3.69166	3.82131	3.69824	3.73783	3.76363	3.74584	3.75865	3.67922	3.94292	3.99797	3.9805	3.9866	3.98148	3.70146	3.87336	3.88339	3.83627	3.74621	3.74061	3.8758	3.72654	3.83033	3.66179	3.69081	3.68538	3.72297	3.67896	3.72964	3.66087	3.64492	3.82517	3.77052	3.75865	3.81038	3.50807	3.68063	3.68646	3.60652	3.59631
1484.56	3.57627	3.68031	3.8076	3.68719	3.72802	3.75148	3.73082	3.74546	3.67062	3.93609	3.98781	3.97036	3.9759	3.97244	3.68999	3.85983	3.86778	3.82078	3.7334	3.72774	3.8633	3.71296	3.8085	3.65272	3.68077	3.67273	3.70988	3.66286	3.71711	3.6514	3.63583	3.81219	3.7579	3.74342	3.79349	3.50271	3.67004	3.67304	3.59535	3.58446
1483.68	3.56971	3.66669	3.79722	3.67555	3.71614	3.73823	3.71691	3.73052	3.66358	3.92948	3.97608	3.96367	3.96626	3.9649	3.67985	3.84593	3.85103	3.80606	3.72059	3.71413	3.85144	3.7013	3.7894	3.64487	3.67086	3.66122	3.69731	3.64848	3.70433	3.64252	3.62663	3.79645	3.74448	3.72854	3.77908	3.49816	3.65988	3.66108	3.58471	3.57425
1482.8	3.56259	3.65256	3.7871	3.66366	3.7029	3.72442	3.70417	3.71492	3.65703	3.91929	3.964	3.95851	3.95734	3.95733	3.67044	3.83279	3.83463	3.79171	3.70969	3.69858	3.84095	3.69028	3.77168	3.63696	3.66095	3.65058	3.68608	3.63556	3.69247	3.63418	3.61657	3.7801	3.73068	3.71555	3.76602	3.49339	3.65028	3.65079	3.57512	3.56503
1481.92	3.55597	3.63984	3.77662	3.65178	3.6884	3.70972	3.69184	3.69898	3.64971	3.90765	3.95167	3.95256	3.94769	3.94713	3.66049	3.81844	3.81844	3.77789	3.70072	3.68252	3.83135	3.6788	3.75616	3.62982	3.65119	3.63881	3.67587	3.62352	3.68177	3.62618	3.60588	3.76328	3.71717	3.70424	3.75407	3.48908	3.64086	3.64015	3.56564	3.55603
1481.04	3.54934	3.62829	3.76511	3.63977	3.67457	3.69691	3.67855	3.68439	3.64237	3.89477	3.94081	3.94355	3.9386	3.93481	3.65051	3.8047	3.80529	3.7658	3.69338	3.66718	3.82215	3.66607	3.74176	3.62224	3.64244	3.62592	3.66519	3.61195	3.67261	3.6169	3.59492	3.74845	3.7039	3.69417	3.74094	3.48426	3.63086	3.62946	3.5555	3.54639
1480.17	3.54303	3.61765	3.75429	3.62729	3.6617	3.68536	3.66508	3.67219	3.6353	3.88211	3.93145	3.93185	3.92846	3.92242	3.63984	3.79085	3.79405	3.75518	3.68532	3.65342	3.81101	3.65371	3.72864	3.61454	3.63547	3.61402	3.65399	3.60082	3.6635	3.60748	3.58453	3.73639	3.69066	3.68308	3.72752	3.47905	3.62164	3.61896	3.54503	3.53685
1479.29	3.53691	3.60746	3.74345	3.61664	3.65057	3.67271	3.65283	3.66079	3.62772	3.86947	3.9218	3.92149	3.91997	3.91089	3.6294	3.77737	3.78482	3.7453	3.67576	3.64103	3.79822	3.64137	3.7162	3.60623	3.62851	3.60309	3.64274	3.58959	3.65399	3.59827	3.5738	3.72586	3.67819	3.67163	3.71424	3.47322	3.61266	3.60827	3.53475	3.52856
1478.42	3.53135	3.59847	3.73313	3.60639	3.64083	3.65862	3.64208	3.64954	3.61878	3.85947	3.91255	3.91241	3.91308	3.90354	3.61952	3.76434	3.77597	3.73573	3.66369	3.62939	3.78367	3.63	3.70336	3.59747	3.62162	3.59315	3.63105	3.57886	3.6436	3.58979	3.56402	3.71499	3.66704	3.66002	3.70111	3.4672	3.6035	3.59749	3.52442	3.51985
1477.54	3.52585	3.5895	3.72328	3.59599	3.63246	3.64517	3.63247	3.63927	3.60981	3.8515	3.9044	3.90587	3.90746	3.89745	3.6099	3.75138	3.76858	3.72499	3.65102	3.61752	3.76876	3.61865	3.6894	3.58939	3.61296	3.5836	3.62056	3.56783	3.63107	3.58217	3.55484	3.7029	3.65666	3.64859	3.68826	3.46219	3.59428	3.58673	3.51437	3.51189
1476.67	3.52051	3.58103	3.71343	3.58506	3.62414	3.63338	3.62202	3.62927	3.6026	3.84587	3.89592	3.8992	3.90121	3.89236	3.60018	3.73964	3.76244	3.71463	3.64055	3.6055	3.75608	3.60838	3.67545	3.58157	3.60446	3.57414	3.61074	3.55746	3.61748	3.5747	3.54613	3.68949	3.64723	3.63805	3.67487	3.45774	3.58528	3.57645	3.50587	3.50368
1475.8	3.51487	3.57193	3.70468	3.57524	3.6152	3.62338	3.6103	3.61909	3.5974	3.84094	3.88832	3.89085	3.89342	3.88613	3.5906	3.72863	3.75472	3.70394	3.63272	3.59313	3.74662	3.59864	3.6628	3.57548	3.59711	3.56573	3.60128	3.54752	3.60495	3.56786	3.53754	3.67625	3.6374	3.62745	3.66206	3.45385	3.57706	3.56692	3.49799	3.49537
1474.93	3.50868	3.56144	3.69605	3.56688	3.60494	3.61443	3.59824	3.60867	3.5932	3.83768	3.88151	3.88233	3.88556	3.87874	3.58173	3.71835	3.74484	3.694	3.62546	3.58143	3.73972	3.58922	3.65147	3.57058	3.59153	3.55794	3.59307	3.53794	3.59376	3.56085	3.52877	3.66399	3.62639	3.61659	3.64984	3.44965	3.57089	3.55655	3.49056	3.4881
1474.06	3.50208	3.54985	3.68778	3.5585	3.59484	3.60497	3.58719	3.59832	3.59012	3.83413	3.87532	3.87567	3.87935	3.87312	3.57394	3.70849	3.73146	3.68443	3.61851	3.57207	3.73344	3.57985	3.64094	3.56622	3.58785	3.54969	3.5861	3.52929	3.58419	3.55406	3.52064	3.65159	3.61469	3.6052	3.63883	3.44459	3.56679	3.54633	3.48282	3.4809
1473.19	3.49492	3.5381	3.67928	3.54948	3.58512	3.59507	3.57689	3.58905	3.58683	3.82961	3.86928	3.87056	3.8734	3.86859	3.56649	3.69907	3.71864	3.67621	3.61106	3.56353	3.72507	3.56995	3.63074	3.56152	3.5841	3.54117	3.57947	3.52077	3.57601	3.54707	3.51373	3.63876	3.60368	3.59493	3.62836	3.43942	3.56183	3.53762	3.47527	3.47315
1472.32	3.48809	3.52776	3.67057	3.53921	3.57615	3.58546	3.56589	3.58024	3.58248	3.82407	3.86174	3.86466	3.86801	3.86497	3.55712	3.69031	3.70697	3.66884	3.60302	3.55505	3.71459	3.55994	3.62094	3.55467	3.57992	3.53214	3.57302	3.51196	3.5675	3.53914	3.50774	3.6268	3.59358	3.58687	3.61898	3.43402	3.55499	3.52944	3.46798	3.4652
1471.45	3.48119	3.51866	3.66186	3.5287	3.56739	3.5763	3.55514	3.57163	3.57651	3.81879	3.85505	3.85649	3.86176	3.8598	3.54612	3.68241	3.69633	3.66205	3.59364	3.54617	3.70411	3.5504	3.61044	3.54595	3.57567	3.52343	3.56686	3.50183	3.55913	3.53016	3.50176	3.6166	3.58415	3.57996	3.61001	3.42984	3.54601	3.52192	3.46088	3.45774
1470.59	3.47455	3.5113	3.65317	3.51953	3.55869	3.56725	3.54545	3.56246	3.56992	3.81256	3.85016	3.84723	3.85469	3.85292	3.53486	3.67356	3.68599	3.65503	3.58284	3.53697	3.69535	3.54241	3.60053	3.53778	3.57126	3.51546	3.5604	3.49133	3.55053	3.5213	3.49543	3.6078	3.57464	3.57271	3.60156	3.4264	3.53664	3.51356	3.45401	3.45059
1469.72	3.46875	3.50462	3.64504	3.51079	3.54961	3.55883	3.53684	3.5539	3.56358	3.806	3.84401	3.83889	3.84659	3.84529	3.52491	3.66478	3.67628	3.64869	3.57303	3.52842	3.68761	3.53592	3.5912	3.53144	3.5666	3.50744	3.55298	3.48174	3.54177	3.51361	3.48927	3.5996	3.56532	3.56509	3.59355	3.42372	3.52856	3.50467	3.44685	3.4442
1468.86	3.46359	3.49777	3.63755	3.5026	3.54071	3.55107	3.52978	3.5459	3.55821	3.79845	3.83648	3.83209	3.8371	3.83733	3.51795	3.65542	3.66775	3.64103	3.56529	3.51984	3.68146	3.52969	3.58263	3.52683	3.56174	3.50049	3.54455	3.47286	3.53336	3.50833	3.48311	3.59131	3.55617	3.55692	3.58456	3.42065	3.52241	3.49598	3.43972	3.43711
1468	3.45859	3.49031	3.63076	3.49444	3.53256	3.54458	3.52237	3.53783	3.55304	3.79111	3.82806	3.82824	3.82905	3.82892	3.51304	3.64753	3.65977	3.63187	3.55934	3.51119	3.67501	3.52297	3.57362	3.52257	3.55631	3.49401	3.5361	3.46373	3.52497	3.50428	3.47628	3.5833	3.54834	3.54929	3.57459	3.4166	3.51661	3.48785	3.43206	3.42949
1467.14	3.45394	3.4818	3.62381	3.48705	3.5256	3.53755	3.51479	3.52914	3.54798	3.78552	3.81982	3.82626	3.82324	3.82109	3.50839	3.64067	3.65174	3.62142	3.55448	3.50297	3.66828	3.51551	3.56397	3.51772	3.55034	3.48803	3.52827	3.45544	3.51716	3.49992	3.46881	3.57572	3.54103	3.54184	3.56402	3.41145	3.51112	3.47986	3.42483	3.42206
1466.28	3.44971	3.47266	3.61505	3.48009	3.51874	3.52955	3.50735	3.51924	3.54304	3.78187	3.81261	3.82332	3.81934	3.81336	3.50286	3.63569	3.6448	3.61114	3.54943	3.49612	3.66147	3.50826	3.55337	3.5121	3.54441	3.48155	3.52044	3.44822	3.50957	3.49471	3.46129	3.56883	3.53443	3.53371	3.55465	3.4068	3.50564	3.47284	3.41748	3.41429
1465.42	3.44524	3.46428	3.6064	3.47418	3.51185	3.52198	3.49987	3.51004	3.53848	3.77865	3.80681	3.81713	3.81452	3.80781	3.49609	3.63093	3.63782	3.60283	3.54452	3.49024	3.65515	3.50188	3.54331	3.50681	3.53919	3.47396	3.51273	3.44228	3.50307	3.48916	3.45379	3.56109	3.52658	3.52488	3.54617	3.40338	3.49989	3.46619	3.41044	3.40674
1464.56	3.44044	3.45628	3.59891	3.46837	3.50469	3.5151	3.49321	3.5025	3.53347	3.77411	3.80057	3.80801	3.80966	3.80275	3.48794	3.62556	3.63127	3.59685	3.53929	3.48446	3.65049	3.49537	3.53431	3.50331	3.53404	3.4658	3.5039	3.43611	3.49574	3.483	3.44643	3.55284	3.51817	3.51579	3.53856	3.40071	3.49407	3.45969	3.40335	3.39927
1463.7	3.43553	3.44871	3.59287	3.46208	3.49697	3.50781	3.48668	3.49622	3.52807	3.76883	3.79452	3.79891	3.80417	3.79692	3.47842	3.61802	3.62442	3.59249	3.53411	3.47808	3.6463	3.4885	3.52704	3.50035	3.52944	3.45784	3.49573	3.42897	3.4881	3.47692	3.4396	3.54433	3.51006	3.50652	3.53107	3.39795	3.48814	3.45292	3.39685	3.39206
1462.84	3.43076	3.44132	3.58689	3.45504	3.48957	3.50046	3.48069	3.49002	3.52213	3.76271	3.7882	3.79253	3.79932	3.79002	3.46862	3.60994	3.61904	3.58788	3.52861	3.47122	3.64209	3.48107	3.52072	3.49718	3.52565	3.45085	3.48804	3.42195	3.48119	3.47107	3.4329	3.53671	3.50395	3.49866	3.52358	3.39517	3.48294	3.44616	3.39104	3.38581
1461.99	3.42668	3.43489	3.58156	3.4488	3.48204	3.4929	3.47439	3.48338	3.51639	3.75599	3.78237	3.7876	3.79384	3.78172	3.46059	3.60129	3.61353	3.58207	3.52235	3.46344	3.6368	3.47401	3.51438	3.49246	3.52219	3.4443	3.48199	3.4158	3.47487	3.46585	3.42725	3.53041	3.49919	3.49093	3.51604	3.39192	3.47897	3.43873	3.38578	3.38027
1461.13	3.42261	3.42922	3.57621	3.4425	3.47543	3.4856	3.46778	3.47653	3.51182	3.75028	3.77714	3.78274	3.78768	3.77294	3.45533	3.59293	3.6069	3.57515	3.51507	3.45635	3.62913	3.46746	3.50793	3.48644	3.51837	3.43819	3.47604	3.40989	3.46875	3.46081	3.42219	3.52392	3.49409	3.48413	3.50804	3.38824	3.4754	3.43091	3.38013	3.37547
1460.28	3.41879	3.424	3.5707	3.43634	3.46893	3.47866	3.46155	3.46932	3.50866	3.74502	3.77443	3.77835	3.78128	3.76678	3.45199	3.58531	3.59867	3.56694	3.50701	3.44985	3.62073	3.46102	3.50133	3.48083	3.51402	3.43217	3.47045	3.40328	3.46187	3.45511	3.41697	3.51694	3.48823	3.47826	3.50125	3.38465	3.47178	3.42384	3.37417	3.37081
1459.43	3.41517	3.41817	3.56491	3.42922	3.46297	3.47236	3.45462	3.46144	3.50636	3.74088	3.77172	3.77499	3.77497	3.76237	3.4483	3.578	3.58978	3.5594	3.49885	3.44375	3.61297	3.45446	3.49472	3.47611	3.50971	3.42558	3.46456	3.39551	3.45505	3.44894	3.41163	3.50932	3.48123	3.47276	3.49548	3.3816	3.46743	3.41726	3.3679	3.36565
1458.58	3.41184	3.41189	3.55824	3.42137	3.45705	3.46674	3.44717	3.45292	3.50371	3.73744	3.76758	3.77158	3.7707	3.7608	3.44287	3.57099	3.58175	3.55176	3.49167	3.43775	3.60701	3.44844	3.48806	3.47151	3.50571	3.41895	3.45883	3.38769	3.44793	3.44314	3.40642	3.50117	3.4736	3.46798	3.49026	3.379	3.46205	3.41131	3.36179	3.36022
1457.73	3.40849	3.40515	3.55146	3.41441	3.45107	3.46103	3.43919	3.44563	3.50007	3.73375	3.7626	3.76587	3.76784	3.76035	3.43694	3.56425	3.57467	3.54459	3.48501	3.43112	3.60258	3.44212	3.48167	3.46655	3.50212	3.4121	3.4536	3.38024	3.44139	3.43898	3.40158	3.49375	3.46544	3.46278	3.48477	3.37658	3.45625	3.40511	3.35583	3.35423
1456.88	3.4044	3.3983	3.54425	3.40824	3.44547	3.45475	3.43139	3.44066	3.49621	3.72997	3.75583	3.75815	3.76469	3.7582	3.43112	3.55835	3.56883	3.53816	3.47806	3.42432	3.59719	3.43607	3.47462	3.46167	3.4985	3.40573	3.4487	3.3728	3.43521	3.43633	3.3969	3.48741	3.45731	3.4564	3.47844	3.37447	3.45158	3.39898	3.3502	3.34762
1456.03	3.40003	3.39215	3.53744	3.40303	3.44064	3.44841	3.42463	3.43715	3.49205	3.72504	3.74949	3.74947	3.75906	3.7532	3.42558	3.55332	3.56368	3.53262	3.47165	3.41749	3.59018	3.431	3.46778	3.45629	3.49444	3.39895	3.44306	3.36511	3.43007	3.43307	3.39185	3.48227	3.44998	3.44946	3.47141	3.37238	3.44816	3.39302	3.34443	3.34083
1455.18	3.39588	3.38619	3.5307	3.39788	3.43607	3.44246	3.41997	3.43359	3.48772	3.72058	3.74444	3.74312	3.75135	3.74573	3.42009	3.54893	3.55844	3.52813	3.46623	3.41098	3.58324	3.42651	3.46071	3.45116	3.49034	3.39246	3.4369	3.35841	3.42544	3.42752	3.38656	3.4778	3.44342	3.4431	3.46518	3.37054	3.44562	3.38736	3.33878	3.33488
1454.33	3.39256	3.38045	3.52395	3.39242	3.43132	3.4372	3.4168	3.42847	3.48323	3.71569	3.74106	3.73824	3.74521	3.73811	3.41453	3.54455	3.55212	3.5236	3.46208	3.40527	3.57743	3.42232	3.45391	3.44519	3.48677	3.38621	3.4309	3.35297	3.42136	3.4205	3.38102	3.47383	3.43779	3.43811	3.45956	3.36863	3.44295	3.38113	3.33332	3.33018
1453.49	3.39008	3.37439	3.5181	3.38672	3.42607	3.43158	3.41388	3.42158	3.47933	3.71091	3.73795	3.73374	3.74115	3.73322	3.40945	3.53852	3.54488	3.51811	3.45759	3.39998	3.573	3.41726	3.44729	3.43943	3.483	3.38033	3.42569	3.34865	3.41711	3.41308	3.37545	3.46961	3.43311	3.4337	3.45345	3.36655	3.43786	3.37438	3.32838	3.32636
1452.64	3.38839	3.36824	3.51204	3.38094	3.42054	3.42552	3.40994	3.41408	3.47632	3.7047	3.73382	3.72804	3.73917	3.72992	3.40399	3.53108	3.53797	3.51085	3.45204	3.39418	3.5686	3.41143	3.44118	3.43488	3.47876	3.37455	3.42125	3.34395	3.41201	3.40596	3.37023	3.46425	3.42917	3.42957	3.4463	3.36471	3.43149	3.36741	3.32325	3.32222
1451.8	3.38549	3.3623	3.5049	3.37495	3.41506	3.4192	3.40413	3.40733	3.47377	3.69829	3.72814	3.72284	3.73786	3.7267	3.39854	3.52276	3.53193	3.50289	3.44616	3.38858	3.56267	3.40527	3.4351	3.4309	3.4739	3.36863	3.41743	3.33866	3.40643	3.39955	3.36573	3.45812	3.42565	3.42498	3.43895	3.36304	3.42557	3.36103	3.31813	3.31745
1450.96	3.3819	3.35673	3.49812	3.36883	3.41009	3.41357	3.39776	3.40203	3.4709	3.6938	3.72159	3.718	3.7356	3.72273	3.39325	3.51509	3.52694	3.49635	3.44093	3.38379	3.55725	3.39957	3.42919	3.42766	3.4696	3.36301	3.41301	3.33365	3.40043	3.39485	3.36167	3.45167	3.42195	3.41992	3.43278	3.36134	3.42153	3.35517	3.31327	3.31249
1450.12	3.37793	3.35188	3.49136	3.36289	3.40528	3.40913	3.39182	3.39742	3.46789	3.69168	3.71433	3.71607	3.73229	3.71825	3.38871	3.50902	3.52263	3.49132	3.4365	3.37934	3.55284	3.39437	3.42363	3.42462	3.46627	3.3578	3.40817	3.3286	3.39486	3.39098	3.35744	3.44536	3.41791	3.41485	3.42924	3.35983	3.41871	3.34971	3.3086	3.30824
1449.28	3.37411	3.3477	3.48557	3.3585	3.40059	3.40517	3.38673	3.39277	3.46487	3.6899	3.70774	3.71485	3.7281	3.71563	3.38548	3.50396	3.51847	3.48784	3.43247	3.37479	3.54863	3.38986	3.41936	3.42146	3.46334	3.35244	3.4028	3.32372	3.3904	3.38756	3.35289	3.43989	3.41354	3.41013	3.42727	3.35872	3.41591	3.34486	3.30379	3.30427
1448.44	3.37054	3.34354	3.47995	3.35451	3.3959	3.40032	3.38158	3.38767	3.46259	3.6874	3.70246	3.71451	3.72197	3.71425	3.38258	3.49929	3.51389	3.48403	3.42769	3.36837	3.54291	3.38611	3.4157	3.41769	3.4601	3.34685	3.39745	3.31862	3.38601	3.38378	3.34823	3.43491	3.40878	3.40468	3.42582	3.35757	3.4123	3.34025	3.29848	3.30051
1447.6	3.36717	3.33873	3.47415	3.35055	3.39073	3.39445	3.37536	3.38241	3.46011	3.68401	3.69976	3.71233	3.71419	3.71267	3.379	3.4948	3.5092	3.47928	3.42095	3.36094	3.53594	3.38276	3.41134	3.41395	3.4557	3.34126	3.39146	3.31365	3.38131	3.38039	3.34357	3.43041	3.40358	3.39862	3.42278	3.35641	3.40797	3.3356	3.29305	3.29619
1446.76	3.36385	3.33254	3.46833	3.34601	3.38479	3.38783	3.36852	3.37731	3.45659	3.68129	3.69975	3.70736	3.70577	3.70951	3.37388	3.49012	3.50319	3.47397	3.41356	3.35373	3.52944	3.37913	3.40498	3.41023	3.45071	3.33559	3.38538	3.30953	3.37669	3.37705	3.33902	3.42614	3.39754	3.39261	3.41727	3.35512	3.40294	3.33053	3.28823	3.29121
1445.92	3.36132	3.32595	3.46356	3.34154	3.37893	3.38155	3.36271	3.3722	3.45182	3.67917	3.69972	3.70125	3.69938	3.70617	3.36745	3.48468	3.4961	3.46768	3.40712	3.34765	3.52318	3.37501	3.39732	3.40643	3.44631	3.33022	3.38012	3.30598	3.37237	3.37381	3.33526	3.42258	3.39153	3.38769	3.40978	3.35468	3.39731	3.32511	3.28382	3.28632
1445.09	3.35972	3.32025	3.45868	3.33666	3.37407	3.37669	3.35827	3.3676	3.44645	3.67682	3.6981	3.69585	3.69647	3.70265	3.36104	3.4788	3.48866	3.46132	3.40268	3.34241	3.51769	3.37061	3.39002	3.40201	3.44292	3.32557	3.37612	3.30185	3.36825	3.37002	3.3319	3.41948	3.38592	3.38427	3.4026	3.35477	3.39221	3.32043	3.27984	3.28172
1444.25	3.35821	3.31647	3.45345	3.33204	3.36993	3.37287	3.35524	3.36239	3.44207	3.67468	3.69538	3.69294	3.69759	3.69874	3.35552	3.47327	3.48159	3.45531	3.4002	3.33763	3.51195	3.3663	3.38404	3.3976	3.44013	3.32151	3.37313	3.29746	3.36338	3.36538	3.32895	3.416	3.3817	3.38115	3.39645	3.35489	3.38794	3.31619	3.27581	3.27728
1443.42	3.35611	3.31356	3.4473	3.32775	3.3659	3.36908	3.35224	3.35676	3.43871	3.67117	3.69074	3.69138	3.69985	3.69538	3.35074	3.4678	3.47643	3.44971	3.39777	3.33285	3.50589	3.36208	3.37916	3.39326	3.43677	3.31721	3.36973	3.29254	3.35848	3.36042	3.32541	3.41247	3.37849	3.37755	3.39237	3.35413	3.38428	3.31266	3.27158	3.2728
1442.59	3.35345	3.3109	3.44073	3.32448	3.3623	3.36541	3.34869	3.35155	3.43559	3.66624	3.68593	3.68981	3.70046	3.69184	3.34644	3.4623	3.47214	3.44529	3.39401	3.32759	3.50022	3.35769	3.3748	3.38963	3.43287	3.31258	3.36525	3.28787	3.35439	3.35542	3.32152	3.40836	3.37591	3.37363	3.38864	3.35238	3.38063	3.3081	3.26712	3.26821
1441.75	3.3512	3.30768	3.43493	3.32127	3.35866	3.36199	3.34441	3.34725	3.433	3.65982	3.68109	3.68756	3.69903	3.68912	3.34186	3.45568	3.4682	3.44187	3.38902	3.32189	3.49511	3.35269	3.37091	3.38686	3.42815	3.30804	3.36078	3.28317	3.35105	3.35127	3.31805	3.40453	3.37292	3.36963	3.38568	3.35104	3.37684	3.30234	3.26271	3.264
1440.92	3.34961	3.30371	3.42947	3.31698	3.35538	3.35812	3.33965	3.34432	3.43098	3.65452	3.67709	3.68597	3.69533	3.68692	3.33768	3.44908	3.4636	3.43888	3.38423	3.3157	3.49033	3.3479	3.36753	3.38422	3.42309	3.30357	3.3569	3.27886	3.34796	3.34783	3.31513	3.40079	3.36968	3.3659	3.38275	3.35061	3.37307	3.297	3.2586	3.26076
1440.09	3.34831	3.29932	3.42415	3.31183	3.35262	3.35426	3.33471	3.34161	3.42926	3.65212	3.67364	3.68428	3.69251	3.68371	3.3343	3.44383	3.45756	3.4351	3.38038	3.31017	3.48539	3.34334	3.36412	3.38236	3.41789	3.29888	3.35365	3.27428	3.34475	3.34447	3.3128	3.39698	3.36612	3.36256	3.37995	3.35059	3.36921	3.29307	3.25501	3.25767
1439.26	3.34753	3.29495	3.4189	3.30658	3.34942	3.34977	3.32993	3.33839	3.42725	3.6514	3.67176	3.68221	3.69059	3.67995	3.3318	3.43987	3.45038	3.42936	3.37695	3.30587	3.48058	3.33891	3.36035	3.38021	3.41295	3.29359	3.35117	3.2697	3.34173	3.34127	3.31057	3.39308	3.36239	3.35895	3.37623	3.35065	3.36603	3.2905	3.2518	3.25435
1438.43	3.34693	3.29132	3.41371	3.30218	3.34601	3.34588	3.32572	3.33451	3.42514	3.65156	3.66992	3.67913	3.68944	3.67768	3.32869	3.43616	3.44358	3.42205	3.37357	3.3024	3.47575	3.33494	3.35591	3.37752	3.40899	3.28822	3.34846	3.2655	3.33916	3.33841	3.30832	3.38948	3.3589	3.35493	3.37158	3.35116	3.36314	3.28782	3.24863	3.25076
1437.61	3.34661	3.28812	3.40843	3.29886	3.34231	3.34219	3.32231	3.33013	3.42246	3.65027	3.66802	3.67468	3.68743	3.67748	3.3255	3.43206	3.43829	3.41505	3.37058	3.29887	3.47121	3.33159	3.35105	3.37421	3.40601	3.28291	3.34611	3.26145	3.33675	3.33629	3.30617	3.38602	3.35565	3.35181	3.36745	3.35234	3.36065	3.28436	3.24541	3.24699
1436.78	3.34621	3.28469	3.40298	3.29581	3.33911	3.33909	3.31974	3.32584	3.41897	3.64833	3.66626	3.67164	3.68487	3.6797	3.32205	3.42784	3.43502	3.40941	3.36766	3.2942	3.46683	3.32872	3.3463	3.37045	3.40251	3.27807	3.34426	3.25793	3.33414	3.33502	3.3041	3.38344	3.35305	3.35083	3.36477	3.35374	3.35703	3.2802	3.24212	3.24327
1435.96	3.34533	3.28094	3.39754	3.29267	3.33652	3.33647	3.3173	3.32173	3.41509	3.64626	3.66564	3.6711	3.6837	3.68308	3.31837	3.42399	3.43264	3.40519	3.36515	3.28901	3.46188	3.3257	3.34199	3.36611	3.3982	3.27348	3.34226	3.25485	3.33117	3.33357	3.30165	3.38187	3.35087	3.35085	3.36398	3.35512	3.3523	3.27597	3.23885	3.23976
1435.13	3.34471	3.27723	3.39288	3.2892	3.33501	3.33412	3.31423	3.31783	3.4113	3.64369	3.66708	3.67369	3.68418	3.68439	3.31445	3.42012	3.42937	3.40121	3.36233	3.28378	3.45697	3.32233	3.33858	3.36206	3.39313	3.26935	3.33988	3.25188	3.32831	3.3315	3.29939	3.38099	3.34857	3.35033	3.36326	3.35637	3.34678	3.27195	3.23557	3.23641
1434.31	3.34485	3.27404	3.38796	3.28552	3.33344	3.33162	3.31009	3.31473	3.40902	3.64232	3.67	3.67818	3.68572	3.68336	3.31054	3.41603	3.42475	3.39785	3.35977	3.2785	3.45154	3.31855	3.33625	3.35852	3.38792	3.26571	3.33738	3.24876	3.32645	3.32831	3.29734	3.38056	3.34677	3.34785	3.36191	3.35819	3.34205	3.26788	3.23254	3.23359
1433.49	3.34533	3.27147	3.38269	3.28281	3.33171	3.32907	3.30567	3.31229	3.40814	3.64212	3.67352	3.68032	3.68674	3.68182	3.30749	3.4119	3.42004	3.396	3.35852	3.27372	3.44555	3.31555	3.33457	3.35532	3.38281	3.26259	3.33564	3.24525	3.3254	3.32536	3.29704	3.38074	3.34577	3.34433	3.36005	3.36019	3.3383	3.26374	3.2297	3.23078
1432.66	3.34607	3.26903	3.3781	3.28059	3.3299	3.32664	3.30219	3.31084	3.40677	3.64496	3.67579	3.67976	3.68829	3.68206	3.30545	3.40795	3.41629	3.39493	3.35854	3.26955	3.4392	3.31306	3.33252	3.35355	3.37846	3.2596	3.33531	3.2422	3.32431	3.32336	3.29774	3.3811	3.3457	3.34121	3.35863	3.3625	3.33543	3.25993	3.22695	3.22813
1431.84	3.34704	3.26686	3.37555	3.2787	3.32837	3.32508	3.30047	3.31012	3.40478	3.64896	3.67742	3.67867	3.69017	3.68264	3.3042	3.40462	3.41419	3.39395	3.35855	3.26645	3.43316	3.31114	3.33003	3.35215	3.37439	3.2566	3.33591	3.24004	3.32313	3.32294	3.29864	3.38097	3.34584	3.33961	3.35762	3.36487	3.33228	3.25674	3.22467	3.22573
1431.02	3.34871	3.26521	3.37488	3.27715	3.32751	3.32445	3.30074	3.30914	3.40237	3.65148	3.67831	3.67865	3.69183	3.68457	3.30266	3.40229	3.41369	3.39331	3.35804	3.26443	3.429	3.30984	3.3272	3.35212	3.37091	3.25405	3.3369	3.23873	3.32212	3.32379	3.29899	3.3804	3.34593	3.33979	3.35698	3.36751	3.32915	3.25485	3.22273	3.22354
1430.21	3.3509	3.26379	3.37481	3.27582	3.32719	3.32454	3.30158	3.30789	3.40066	3.65146	3.67954	3.68032	3.69327	3.6874	3.3011	3.40153	3.41367	3.39381	3.3573	3.26259	3.42498	3.30913	3.32487	3.35197	3.36732	3.2514	3.33775	3.23829	3.32182	3.32439	3.29912	3.37949	3.34601	3.34097	3.35635	3.37095	3.32611	3.25369	3.22123	3.22171
1429.39	3.35329	3.26235	3.37413	3.27521	3.32777	3.32531	3.30254	3.30686	3.40109	3.64958	3.68139	3.68327	3.69478	3.68998	3.29964	3.40219	3.41277	3.3958	3.35682	3.26034	3.42097	3.30828	3.32321	3.35137	3.364	3.24911	3.33822	3.23788	3.32201	3.32438	3.29959	3.37923	3.34653	3.34189	3.35589	3.37433	3.32361	3.25347	3.21975	3.21966
1428.57	3.35635	3.26078	3.37294	3.27556	3.32971	3.32637	3.30376	3.30636	3.40296	3.64753	3.68432	3.68607	3.69725	3.69165	3.29937	3.40347	3.41232	3.39788	3.35752	3.25769	3.41643	3.30664	3.32204	3.34964	3.36119	3.24712	3.33905	3.23757	3.32296	3.32379	3.30012	3.37942	3.34727	3.34208	3.35574	3.37788	3.32152	3.2536	3.21842	3.21762
1427.76	3.3594	3.2598	3.37239	3.27735	3.33235	3.3277	3.30432	3.30643	3.40525	3.64805	3.68677	3.68945	3.70117	3.69351	3.29978	3.40494	3.41319	3.39974	3.36021	3.25485	3.41188	3.30524	3.32145	3.34711	3.35825	3.24572	3.34141	3.23686	3.32476	3.32432	3.30038	3.38035	3.34876	3.34196	3.35625	3.38225	3.31925	3.25384	3.21737	3.21603
1426.94	3.36222	3.25953	3.37226	3.27949	3.33499	3.32898	3.3037	3.30696	3.40695	3.65221	3.68866	3.69395	3.7051	3.69677	3.30077	3.40719	3.41596	3.40146	3.3642	3.25167	3.40746	3.30484	3.32139	3.3446	3.35443	3.24458	3.34539	3.23588	3.32724	3.32607	3.30095	3.38254	3.35115	3.3422	3.35752	3.38805	3.31674	3.25388	3.21649	3.21486
1426.13	3.36456	3.26005	3.37242	3.28112	3.33746	3.33059	3.30245	3.30746	3.40848	3.65781	3.69116	3.70076	3.70904	3.7028	3.30197	3.41051	3.41966	3.40426	3.36838	3.24808	3.40302	3.30639	3.3215	3.34273	3.34956	3.24397	3.34972	3.23468	3.32971	3.32861	3.30224	3.38606	3.35428	3.34343	3.35972	3.39409	3.31333	3.25407	3.21595	3.2143
1425.31	3.3672	3.26074	3.37266	3.28279	3.34039	3.33188	3.30188	3.30813	3.40926	3.66251	3.69663	3.70958	3.71293	3.71152	3.30308	3.41405	3.42284	3.40709	3.37267	3.24493	3.3979	3.30975	3.32219	3.34213	3.34443	3.24408	3.35385	3.23404	3.33194	3.33176	3.30434	3.39088	3.35737	3.34562	3.36271	3.40022	3.30998	3.25479	3.21561	3.21376
1424.5	3.37047	3.2615	3.37405	3.28545	3.34345	3.33328	3.30208	3.30914	3.41089	3.66757	3.70607	3.71758	3.72001	3.7226	3.30387	3.41681	3.42493	3.41026	3.37711	3.24277	3.39294	3.31394	3.32418	3.34254	3.3398	3.24544	3.35767	3.23497	3.33477	3.33569	3.30677	3.39701	3.36059	3.34903	3.36621	3.40631	3.30641	3.25688	3.21589	3.21321
1423.69	3.37574	3.26261	3.37738	3.28992	3.34687	3.33551	3.3037	3.3108	3.41345	3.67318	3.71682	3.72591	3.73068	3.73386	3.30518	3.4196	3.42707	3.41397	3.38261	3.24164	3.38904	3.31789	3.32773	3.34386	3.33642	3.24843	3.36186	3.23755	3.33899	3.33997	3.3088	3.40377	3.36421	3.35312	3.3706	3.41388	3.30319	3.2603	3.21732	3.21347
1422.88	3.38236	3.26442	3.38286	3.29531	3.35113	3.33955	3.3065	3.31322	3.41707	3.68084	3.72836	3.73491	3.74315	3.74523	3.30679	3.42354	3.43097	3.41932	3.38917	3.24116	3.38529	3.32144	3.3325	3.34534	3.3338	3.2533	3.36765	3.24125	3.3447	3.34452	3.31071	3.41108	3.36999	3.35796	3.37588	3.42276	3.3007	3.26529	3.21978	3.21478
1422.07	3.38877	3.26671	3.38996	3.30027	3.35653	3.34469	3.31057	3.31648	3.42133	3.68957	3.74005	3.74623	3.75718	3.75592	3.30933	3.4294	3.43695	3.42605	3.39586	3.24034	3.38114	3.32538	3.33684	3.347	3.33093	3.25918	3.37416	3.245	3.35105	3.34811	3.31275	3.41795	3.37719	3.36321	3.3816	3.43234	3.29847	3.27091	3.22273	3.21653
1421.26	3.39374	3.26875	3.39781	3.30465	3.36309	3.34991	3.31499	3.31979	3.42625	3.69857	3.75205	3.75958	3.77128	3.76682	3.31244	3.43613	3.44458	3.43219	3.40284	3.23935	3.37702	3.33	3.34151	3.34847	3.32681	3.26546	3.38074	3.24804	3.35716	3.35103	3.31523	3.42537	3.38473	3.36845	3.38747	3.44225	3.29692	3.27621	3.22504	3.2177
1420.45	3.39839	3.27085	3.40553	3.30963	3.37005	3.35449	3.31971	3.32322	3.43106	3.70893	3.76523	3.77515	3.78495	3.77874	3.31647	3.44164	3.45269	3.43725	3.41108	3.23822	3.37329	3.33572	3.34639	3.34974	3.32157	3.27199	3.38728	3.2507	3.3631	3.35387	3.31858	3.43328	3.39165	3.37416	3.39371	3.4527	3.2953	3.28108	3.22715	3.21829
1419.65	3.40339	3.27406	3.41438	3.31621	3.37731	3.35904	3.32454	3.32748	3.43597	3.72234	3.78017	3.79255	3.80016	3.79443	3.32046	3.44721	3.4609	3.44229	3.42069	3.23766	3.37047	3.34204	3.35212	3.35191	3.31675	3.27972	3.3944	3.25395	3.3698	3.35803	3.32231	3.44282	3.3979	3.38156	3.40054	3.46501	3.29399	3.28735	3.23026	3.2192
1418.84	3.4103	3.27867	3.42559	3.32496	3.38545	3.36517	3.33036	3.33348	3.44216	3.73805	3.79813	3.81238	3.81878	3.81368	3.32482	3.45447	3.47011	3.4496	3.43183	3.23819	3.36822	3.35032	3.35946	3.35455	3.31373	3.28934	3.40272	3.25896	3.3779	3.36421	3.32696	3.4537	3.4054	3.39096	3.40866	3.47926	3.29328	3.29623	3.23609	3.22175
1418.04	3.41864	3.2847	3.43935	3.33516	3.39487	3.37305	3.33809	3.34085	3.45067	3.75274	3.82036	3.83545	3.84118	3.83675	3.32951	3.46527	3.4815	3.46043	3.44436	3.23965	3.36666	3.3607	3.36889	3.35786	3.31271	3.30067	3.41303	3.26599	3.3873	3.37264	3.33319	3.46635	3.4155	3.40173	3.41916	3.4943	3.29364	3.30832	3.24376	3.22599
1417.23	3.42675	3.29083	3.45501	3.34627	3.40551	3.38192	3.347	3.3487	3.46098	3.76745	3.84741	3.86158	3.86628	3.86317	3.33482	3.47877	3.49483	3.47361	3.45753	3.24195	3.3652	3.37276	3.38056	3.36114	3.31171	3.3128	3.4238	3.27377	3.39722	3.38176	3.34052	3.47974	3.42772	3.41267	3.43109	3.50813	3.29435	3.32246	3.25136	3.23118
1416.43	3.43397	3.29656	3.4718	3.35756	3.41666	3.38993	3.35494	3.35559	3.47256	3.78372	3.87936	3.89175	3.89256	3.89227	3.34025	3.49181	3.50841	3.48772	3.47077	3.24421	3.36342	3.38567	3.39229	3.36377	3.30903	3.32522	3.43442	3.28141	3.40757	3.38997	3.34805	3.49361	3.44133	3.42293	3.44287	3.52037	3.29451	3.33726	3.25742	3.23659
1415.63	3.44023	3.30272	3.48995	3.3687	3.42764	3.39796	3.36154	3.36138	3.4845	3.80337	3.91423	3.92692	3.92137	3.92413	3.34667	3.50311	3.52058	3.50121	3.48369	3.24583	3.36137	3.39836	3.40399	3.36595	3.30519	3.33858	3.44458	3.2882	3.41871	3.39731	3.35426	3.50692	3.4549	3.43282	3.45326	3.53318	3.29364	3.35305	3.26268	3.24139
1414.83	3.44652	3.30979	3.51066	3.38048	3.44005	3.40753	3.36805	3.3679	3.49763	3.8268	3.95331	3.96874	3.95416	3.96075	3.35466	3.51385	3.53256	3.51534	3.49762	3.24807	3.36019	3.41213	3.41633	3.36904	3.30127	3.35516	3.45563	3.29582	3.43169	3.40528	3.36057	3.52029	3.46884	3.44366	3.46331	3.54864	3.29301	3.36973	3.2695	3.24658
1414.03	3.45393	3.31891	3.53609	3.39437	3.45455	3.42006	3.37636	3.37605	3.51282	3.85261	3.99568	4.01691	3.99262	4.00107	3.36402	3.52673	3.54688	3.53104	3.51318	3.25215	3.36096	3.42791	3.4312	3.37471	3.30007	3.3758	3.46965	3.30499	3.44738	3.41499	3.36831	3.53583	3.48436	3.45693	3.47525	3.5681	3.29431	3.38831	3.27938	3.2535
1413.23	3.46298	3.33017	3.56596	3.41151	3.47137	3.43489	3.38812	3.38702	3.53025	3.88106	4.04251	4.07091	4.04096	4.04954	3.37399	3.54239	3.56427	3.54945	3.53162	3.25865	3.36323	3.44626	3.44893	3.38253	3.30174	3.40039	3.48629	3.31672	3.46577	3.42709	3.37819	3.55415	3.50097	3.47259	3.4909	3.58855	3.29728	3.41034	3.29301	3.26233
1412.43	3.47203	3.34305	3.59936	3.43161	3.48883	3.44976	3.40198	3.39914	3.54913	3.91463	4.09801	4.13185	4.09825	4.1096	3.38412	3.55937	3.5835	3.56755	3.55118	3.26666	3.36517	3.46611	3.46786	3.39028	3.30424	3.42806	3.50407	3.32997	3.48463	3.44003	3.38876	3.57362	3.51855	3.48924	3.51001	3.60888	3.30043	3.4346	3.30823	3.27233
1411.63	3.48017	3.35662	3.63462	3.45268	3.5063	3.46327	3.41555	3.41055	3.56821	3.9536	4.16309	4.20591	4.16299	4.17845	3.39386	3.57608	3.60101	3.584	3.57127	3.27415	3.3657	3.48629	3.48663	3.39614	3.30559	3.45749	3.5205	3.34396	3.50322	3.45189	3.3982	3.5936	3.53673	3.50528	3.53006	3.62778	3.30164	3.46106	3.32335	3.28207
1410.84	3.48766	3.3703	3.67336	3.47467	3.52332	3.47592	3.42833	3.42148	3.58784	3.99619	4.24783	4.2982	4.23959	4.25592	3.40354	3.59183	3.61657	3.59817	3.59017	3.2811	3.36527	3.5077	3.50525	3.39975	3.30476	3.48958	3.53573	3.35734	3.52172	3.46187	3.40611	3.61394	3.55553	3.52031	3.54953	3.64711	3.30126	3.48958	3.33745	3.2913
1410.04	3.49473	3.38421	3.71703	3.4974	3.54165	3.48917	3.44067	3.43261	3.6085	4.04283	4.35124	4.42202	4.33991	4.35483	3.41356	3.60855	3.6331	3.61397	3.60908	3.28865	3.36599	3.53181	3.52595	3.40349	3.30247	3.52572	3.55164	3.37085	3.54172	3.47118	3.41435	3.63638	3.5755	3.53626	3.56922	3.66908	3.30095	3.52057	3.35171	3.30107
1409.24	3.50195	3.39993	3.76911	3.52247	3.56204	3.50489	3.45507	3.44541	3.63196	4.09471	4.50056	4.61883	4.4913	4.48767	3.42467	3.627	3.65304	3.63255	3.62838	3.29771	3.36855	3.56034	3.55024	3.40915	3.30077	3.56866	3.57073	3.38524	3.56329	3.48174	3.42484	3.66168	3.59742	3.55406	3.58982	3.69383	3.30364	3.55557	3.36832	3.31324
1408.45	3.50942	3.41769	3.83219	3.55122	3.58509	3.52265	3.4723	3.46089	3.65917	4.15716	4.7219	4.71288	4.63969	4.72925	3.43742	3.64824	3.67757	3.65454	3.64882	3.30912	3.3727	3.59319	3.57795	3.41731	3.30062	3.62116	3.59318	3.40248	3.58648	3.49435	3.43855	3.68957	3.62114	3.57454	3.61223	3.72089	3.30868	3.59642	3.38807	3.32798
1407.66	3.51701	3.43748	3.9121	3.58244	3.60978	3.54248	3.49098	3.47771	3.69063	4.24061	4.77465	4.90833	4.6995	4.75938	3.45048	3.66851	3.70385	3.67779	3.67053	3.32236	3.37736	3.62948	3.60953	3.42748	3.30184	3.68378	3.61772	3.42266	3.61091	3.5085	3.45309	3.7179	3.64671	3.59704	3.63561	3.74841	3.31404	3.64351	3.41122	3.34433
1406.87	3.52282	3.45851	4.01408	3.61641	3.636	3.56246	3.50926	3.49509	3.72634	4.3721	4.86406	4.95374	5.03274	4.96164	3.46329	3.68821	3.73051	3.70098	3.69236	3.33645	3.38092	3.66839	3.64419	3.43721	3.30265	3.75981	3.64327	3.44483	3.63832	3.52315	3.4664	3.74649	3.67494	3.62028	3.65938	3.77673	3.31768	3.69847	3.43631	3.36148
1406.07	3.52665	3.4813	4.15022	3.65361	3.66492	3.58344	3.52805	3.51235	3.76711	4.40871	5.0263	4.83993	4.88735	4.95088	3.4759	3.70755	3.75678	3.72418	3.71336	3.35087	3.38362	3.71007	3.68314	3.44559	3.30196	3.85542	3.66907	3.46742	3.66727	3.53861	3.47881	3.77506	3.7062	3.64329	3.68418	3.80781	3.32019	3.76359	3.46363	3.37988
1405.28	3.52877	3.50753	4.35902	3.69598	3.69728	3.60665	3.54953	3.53146	3.81298	4.61185	5.30694	5.09691	5.69897	5.30103	3.49067	3.7294	3.78306	3.74825	3.73403	3.36721	3.38635	3.75884	3.72704	3.45403	3.30119	3.98665	3.69658	3.4918	3.69888	3.5558	3.49273	3.80668	3.74121	3.66614	3.71099	3.84575	3.32369	3.84377	3.49387	3.40134
1404.49	3.53082	3.53956	4.64074	3.74544	3.73366	3.63378	3.57486	3.55327	3.86629	4.5625	#DIV/0!	#DIV/0!	#DIV/0!	#DIV/0!	3.50936	3.75319	3.81364	3.77466	3.75629	3.38725	3.3914	3.81683	3.77652	3.46409	3.30234	4.15394	3.72866	3.51981	3.73493	3.57365	3.50922	3.84259	3.77906	3.69037	3.74047	3.90385	3.33059	3.9483	3.52843	3.42699
1403.71	3.53265	3.57675	4.82446	3.80148	3.77196	3.66283	3.60287	3.57691	3.9333	4.56887	#DIV/0!	#DIV/0!	#DIV/0!	#DIV/0!	3.52986	3.77803	3.84672	3.80083	3.77881	3.41071	3.3991	3.88729	3.83346	3.47575	3.30561	4.47259	3.76391	3.55202	3.77619	3.59318	3.52808	3.8823	3.81694	3.71919	3.77326	3.82288	3.34008	4.09177	3.56774	3.45662
1402.92	3.5319	3.61586	4.49274	3.86281	3.81124	3.69188	3.62985	3.60026	4.01507	4.81048	#DIV/0!	#DIV/0!	#DIV/0!	#DIV/0!	3.54825	3.80017	3.88199	3.82412	3.79752	3.43616	3.40701	3.97069	3.90021	3.48621	3.3084	4.59115	3.79783	3.5861	3.82193	3.61269	3.54648	3.92099	3.85443	3.74972	3.80713	3.85195	3.34848	4.25164	3.61083	3.48781
1402.13	3.52635	3.65475	4.72125	3.93277	3.8487	3.71846	3.65364	3.62198	4.1238	4.81932	#DIV/0!	#DIV/0!	#DIV/0!	#DIV/0!	3.56197	3.81719	3.92551	3.84094	3.80847	3.46191	3.41292	4.07524	3.97923	3.49326	3.30837	4.69147	3.82973	3.62063	3.86926	3.62966	3.56197	3.958	3.88894	3.7802	3.83829	3.87822	3.35365	4.62979	3.65787	3.5196
1401.35	3.51701	3.6952	#DIV/0!	4.02259	3.8875	3.74434	3.67666	3.64218	4.17109	4.6421	#DIV/0!	#DIV/0!	#DIV/0!	#DIV/0!	3.57281	3.82928	3.86677	3.85265	3.81122	3.48978	3.41666	4.22197	4.08211	3.49866	3.30559	5.24074	3.85896	3.65702	3.91818	3.64347	3.57595	3.99494	3.92043	3.80826	3.869	3.90185	3.35695	4.54566	3.71347	3.55404
1400.56	3.50671	3.74233	#DIV/0!	4.18701	3.92953	3.77174	3.70391	3.66443	4.22086	4.82475	#DIV/0!	#DIV/0!	#DIV/0!	#DIV/0!	3.58525	3.83822	3.87333	3.86302	3.80819	3.52382	3.42106	4.48485	4.25434	3.50551	3.30292	#DIV/0!	3.89262	3.69714	3.97233	3.65679	3.59122	4.03344	3.9511	3.83519	3.89991	3.91753	3.36224	4.50458	3.78285	3.59529
1399.78	3.49743	3.79825	#DIV/0!	4.19026	3.97536	3.79705	3.7363	3.68819	4.34911	5.20006	#DIV/0!	#DIV/0!	#DIV/0!	#DIV/0!	3.59894	3.84412	3.87506	3.87137	3.80122	3.56887	3.42764	4.37289	4.25724	3.51572	3.30304	#DIV/0!	3.92944	3.74175	4.03453	3.67125	3.60936	4.06987	3.98102	3.85908	3.92923	3.92753	3.37066	4.93043	3.87664	3.64505
1398.99	3.48581	3.86177	#DIV/0!	4.39511	4.01558	3.81793	3.76783	3.71115	4.32	4.7993	#DIV/0!	#DIV/0!	#DIV/0!	#DIV/0!	3.61061	3.84181	3.87253	3.87348	3.7883	3.63124	3.43471	4.57649	4.23267	3.52691	3.30357	#DIV/0!	3.96114	3.78784	4.11997	3.68356	3.6264	4.09047	4.0063	3.87843	3.95229	3.93247	3.3789	5.30103	3.9103	3.70184
1398.21	3.46746	3.92706	#DIV/0!	4.34216	4.03529	3.83087	3.78977	3.72758	4.4761	5.14238	#DIV/0!	#DIV/0!	#DIV/0!	#DIV/0!	3.61634	3.82706	3.85802	3.86292	3.76345	3.61002	3.43813	4.43027	4.37157	3.53454	3.29986	#DIV/0!	3.97639	3.83168	4.03611	3.68785	3.63673	4.0876	4.02344	3.88886	3.95926	3.92654	3.38196	#DIV/0!	4.01288	3.76826
1397.43	3.4394	3.99009	#DIV/0!	4.30252	4.02464	3.83089	3.79427	3.72957	4.51506	4.94601	#DIV/0!	#DIV/0!	#DIV/0!	#DIV/0!	3.61184	3.79306	3.82402	3.82379	3.72267	3.65057	3.43443	4.68386	4.37174	3.53587	3.28856	#DIV/0!	3.9672	3.86585	4.12601	3.67949	3.63564	4.05527	4.02267	3.88322	3.94584	3.9005	3.37758	#DIV/0!	4.18057	3.89731
1396.65	3.40198	4.04408	#DIV/0!	4.52923	3.98183	3.8101	3.78076	3.71319	4.65866	4.77002	#DIV/0!	#DIV/0!	#DIV/0!	#DIV/0!	3.59489	3.74088	3.76987	3.75202	3.66654	3.69675	3.42247	4.3156	4.41756	3.53258	3.27015	#DIV/0!	3.93334	3.88092	4.06659	3.65797	3.62306	3.99653	3.98896	3.85293	3.90854	3.91141	3.36676	#DIV/0!	4.18849	3.7859
1395.87	3.35892	4.07625	#DIV/0!	4.35485	3.9093	3.76692	3.7481	3.68093	4.48854	4.81176	#DIV/0!	#DIV/0!	#DIV/0!	#DIV/0!	3.56609	3.67425	3.69896	3.66851	3.59861	3.62556	3.40339	4.29457	4.33902	3.52598	3.24682	#DIV/0!	3.87418	3.8696	3.99159	3.62587	3.59944	3.9135	3.92309	3.79915	3.84829	3.81277	3.35116	#DIV/0!	4.26866	3.81677
1395.09	3.31216	4.07121	#DIV/0!	4.18236	3.81656	3.7036	3.69735	3.63519	4.39607	4.58395	5.11092	5.32879	#DIV/0!	#DIV/0!	3.52575	3.59844	3.61765	3.58044	3.52334	3.62297	3.37694	4.53022	4.27542	3.5138	3.21935	#DIV/0!	3.79363	3.82931	3.89834	3.58396	3.5646	3.81247	3.83284	3.72761	3.77049	3.71204	3.3306	#DIV/0!	4.23005	3.91186
1394.31	3.25907	4.01208	#DIV/0!	4.24649	3.71034	3.62456	3.62731	3.5752	4.10498	4.21792	4.65828	4.57052	4.70831	4.69983	3.47416	3.5137	3.60511	3.48867	3.44084	3.59939	3.3412	4.47427	4.40264	3.48743	3.18503	#DIV/0!	3.69605	3.75986	3.78904	3.52895	3.51586	3.70037	3.72647	3.64199	3.6775	3.60876	3.30178	#DIV/0!	4.14218	3.85176
1393.53	3.19743	3.90155	#DIV/0!	3.91999	3.59344	3.52947	3.54005	3.49808	3.99304	3.88563	4.14609	4.21128	4.45895	4.28078	3.40925	3.4196	3.47185	3.3908	3.35053	3.54834	3.29224	4.19569	3.95679	3.43484	3.1403	#DIV/0!	3.5839	3.66299	3.66467	3.45726	3.45011	3.57891	3.60781	3.54284	3.56986	3.50234	3.26025	4.92082	3.92384	3.77831
1392.76	3.12749	3.7557	4.8704	3.69574	3.46799	3.42178	3.43808	3.40447	3.70906	3.65525	3.76716	3.80217	3.9023	3.83252	3.3306	3.31758	3.35247	3.28798	3.25321	3.54731	3.22851	3.83623	3.70969	3.35246	3.08438	#DIV/0!	3.46331	3.54483	3.53086	3.36992	3.3688	3.4523	3.48054	3.432	3.45267	3.39138	3.20478	4.42007	3.73611	3.67663
1391.98	3.05207	3.596	4.24023	3.50136	3.33881	3.30774	3.32691	3.30001	3.50352	3.46306	3.52012	3.5361	3.61008	3.56232	3.24154	3.21213	3.23685	3.18277	3.15237	3.41683	3.15173	3.59084	3.50534	3.25383	3.01898	4.54895	3.33821	3.41563	3.39389	3.27302	3.27617	3.32355	3.35055	3.31564	3.33077	3.27866	3.13736	4	3.6536	3.55274
1391.21	2.97364	3.43834	3.67162	3.33122	3.21152	3.19311	3.21242	3.19153	3.32568	3.29571	3.32434	3.33222	3.39139	3.35484	3.14675	3.10696	3.12578	3.07852	3.05138	3.29194	3.06656	3.39186	3.32919	3.14949	2.94718	4.37309	3.21429	3.28494	3.26127	3.17281	3.17791	3.19846	3.22404	3.19905	3.21036	3.16768	3.06158	3.70619	3.44212	3.41963
1390.43	2.89265	3.28794	3.3896	3.17973	3.08901	3.07986	3.09833	3.08255	3.1685	3.14641	3.15899	3.16218	3.2127	3.18291	3.04875	3.00316	3.01835	2.97649	2.95127	3.22116	2.97655	3.2224	3.17426	3.0443	2.87038	3.84591	3.09369	3.1574	3.13468	3.0717	3.07666	3.07874	3.10272	3.08485	3.09315	3.0593	2.97987	3.40666	3.31951	3.28505
1389.66	2.80827	3.14432	3.18153	3.04041	2.97014	2.96733	2.98464	2.97263	3.02513	3.0101	3.01201	3.01257	3.05735	3.03238	2.94771	2.89946	2.91215	2.87514	2.85125	3.07761	2.88244	3.07124	3.033	2.93817	2.78869	3.50035	2.97578	3.03256	3.01234	2.9689	2.97293	2.96283	2.98482	2.9724	2.97785	2.95213	2.89242	3.19728	3.15687	3.15105
1388.89	2.72132	3.00628	3.00835	2.90894	2.85389	2.85551	2.87195	2.86223	2.89144	2.88271	2.87726	2.87658	2.91708	2.89557	2.84491	2.79596	2.80679	2.77407	2.75134	2.94731	2.78533	2.93152	2.90046	2.83113	2.70277	3.20339	2.86001	2.91018	2.89327	2.86458	2.86752	2.84956	2.86941	2.86112	2.86375	2.84559	2.80005	3.02346	3.00927	3.01856
1388.12	2.63455	2.87623	2.85781	2.78552	2.74225	2.74703	2.76271	2.75436	2.76689	2.76397	2.75301	2.75206	2.78876	2.76995	2.74316	2.69504	2.70456	2.67532	2.65385	2.82448	2.68808	2.8021	2.77633	2.72595	2.61569	2.99643	2.74889	2.79251	2.77907	2.76178	2.76346	2.74064	2.75833	2.75315	2.75348	2.74205	2.70637	2.87202	2.87303	2.89096
1387.35	2.55042	2.75585	2.72526	2.67141	2.63718	2.6446	2.65939	2.65176	2.65193	2.65398	2.63922	2.63815	2.67167	2.65494	2.64535	2.59907	2.60751	2.58109	2.56078	2.70979	2.59371	2.68351	2.66162	2.62554	2.53043	2.83059	2.64439	2.682	2.67195	2.66339	2.66352	2.63797	2.65376	2.65074	2.64932	2.64384	2.61477	2.73812	2.74842	2.77137
1386.58	2.46926	2.64439	2.60688	2.56584	2.5387	2.54798	2.56198	2.55471	2.54576	2.55188	2.53464	2.53347	2.5643	2.54911	2.55207	2.50807	2.51571	2.49167	2.47224	2.60276	2.50309	2.57477	2.55561	2.53055	2.44763	2.69051	2.54625	2.5786	2.57184	2.56975	2.56803	2.54149	2.55555	2.55403	2.55153	2.55093	2.52625	2.61816	2.63426	2.66009
1385.81	2.39058	2.54053	2.49957	2.4676	2.44593	2.45649	2.46971	2.46262	2.44717	2.4566	2.43776	2.43655	2.46508	2.45103	2.46312	2.42143	2.42849	2.40647	2.38774	2.5025	2.41608	2.47428	2.45706	2.44053	2.36729	2.56807	2.45355	2.48143	2.47771	2.48037	2.47673	2.45045	2.46284	2.46237	2.45923	2.46246	2.44087	2.5093	2.52887	2.55604
1385.04	2.3147	2.44368	2.40163	2.37601	2.35862	2.37008	2.38253	2.37554	2.35548	2.3677	2.34776	2.3466	2.37317	2.35997	2.37858	2.33906	2.34581	2.32552	2.30734	2.40878	2.33305	2.38117	2.36542	2.35532	2.28983	2.45905	2.36604	2.39026	2.38917	2.39523	2.38979	2.36465	2.37548	2.37576	2.37221	2.37834	2.35887	2.40985	2.43137	2.45885
1384.27	2.24167	2.35312	2.31156	2.29019	2.2764	2.28841	2.30015	2.29324	2.27002	2.28461	2.26389	2.26281	2.28772	2.27519	2.29825	2.26077	2.2674	2.24859	2.23079	2.32122	2.25408	2.29449	2.27989	2.27466	2.21549	2.36054	2.28329	2.30457	2.30569	2.31405	2.30708	2.28361	2.293	2.2938	2.29008	2.29838	2.28053	2.31838	2.3407	2.36777
1383.51	2.17131	2.26768	2.22784	2.20918	2.19838	2.21073	2.22184	2.21492	2.18989	2.2066	2.18524	2.1843	2.20773	2.19579	2.22162	2.18599	2.19262	2.17512	2.15762	2.23896	2.17882	2.21316	2.19943	2.19789	2.14416	2.27002	2.20455	2.2235	2.22646	2.2362	2.22802	2.2065	2.21463	2.21587	2.21205	2.2221	2.20558	2.2333	2.25549	2.28169
1382.74	2.10406	2.18717	2.14986	2.13282	2.12448	2.13704	2.1476	2.1406	2.11483	2.13348	2.11154	2.11078	2.13287	2.1215	2.14879	2.11497	2.1216	2.10533	2.08802	2.16178	2.10743	2.13689	2.12378	2.12514	2.07615	2.18636	2.12989	2.14697	2.15158	2.16203	2.15289	2.1334	2.14042	2.14201	2.13816	2.14971	2.13431	2.15397	2.17536	2.20047
1381.98	2.04078	2.11217	2.07779	2.06168	2.05531	2.06804	2.07814	2.07088	2.04506	2.06544	2.043	2.04244	2.06329	2.05241	2.08049	2.04841	2.05503	2.03992	2.02267	2.08991	2.0406	2.066	2.05337	2.05705	2.01218	2.10947	2.06	2.07558	2.08161	2.09239	2.08244	2.06504	2.07103	2.07296	2.06902	2.08189	2.06744	2.08055	2.10079	2.12474
1381.22	1.98158	2.04261	2.01134	1.99574	1.99094	2.00381	2.0135	2.00587	1.98039	2.00228	1.97942	1.97909	1.99877	1.98838	2.0168	1.98638	1.99303	1.97894	1.96163	2.02325	1.97836	2.00037	1.98815	1.99366	1.95236	2.0389	1.99497	2.00926	2.01657	2.02742	2.01674	2.00148	2.0065	2.00872	2.00468	2.01867	2.00502	2.01278	2.03172	2.05457
1380.45	1.9262	1.97809	1.94997	1.93451	1.93105	1.94399	1.95329	1.94528	1.9204	1.94361	1.92042	1.92033	1.93894	1.92901	1.95738	1.92853	1.93523	1.922	1.90463	1.96133	1.92037	1.93952	1.9277	1.93461	1.89641	1.97397	1.93445	1.94764	1.95605	1.96682	1.95542	1.94233	1.94643	1.94892	1.94478	1.95974	1.94673	1.95013	1.96768	1.98949
1379.69	1.87471	1.91855	1.89348	1.87796	1.87562	1.88865	1.89754	1.8892	1.865	1.88931	1.86585	1.866	1.88368	1.87414	1.90222	1.87483	1.88164	1.8691	1.85168	1.90409	1.86659	1.88338	1.8719	1.87989	1.8444	1.91449	1.87845	1.89069	1.90003	1.91066	1.89856	1.88752	1.89082	1.89353	1.88932	1.90509	1.89258	1.89243	1.90869	1.92948
1378.93	1.82703	1.86387	1.84165	1.82594	1.82455	1.83766	1.84618	1.83753	1.814	1.83922	1.8155	1.81589	1.83278	1.82357	1.85123	1.82518	1.8321	1.82016	1.80271	1.85138	1.8169	1.8318	1.8206	1.8294	1.79626	1.86022	1.82686	1.83832	1.84841	1.85887	1.8461	1.83697	1.83954	1.8424	1.83819	1.85459	1.84248	1.83949	1.85465	1.8744
1378.17	1.78242	1.81325	1.79373	1.77772	1.77712	1.79029	1.7985	1.78951	1.76674	1.79274	1.7688	1.7694	1.7856	1.77666	1.80376	1.77889	1.78593	1.77453	1.75707	1.80256	1.77064	1.78403	1.77309	1.78246	1.75135	1.81031	1.77895	1.78977	1.80048	1.81065	1.79735	1.78996	1.79188	1.79481	1.79064	1.80755	1.79578	1.7906	1.80474	1.82343
1377.41	1.74027	1.76593	1.74902	1.73258	1.73261	1.74578	1.75376	1.74437	1.72257	1.74927	1.72519	1.72597	1.74152	1.7328	1.75916	1.73533	1.74248	1.73163	1.7141	1.75697	1.72719	1.73937	1.72864	1.73844	1.70905	1.76394	1.73398	1.74429	1.75553	1.76527	1.75156	1.74581	1.74713	1.75008	1.74598	1.76329	1.75188	1.74504	1.75815	1.77579
1376.65	1.70055	1.72174	1.70734	1.69037	1.6909	1.70401	1.71185	1.70201	1.68134	1.70866	1.68449	1.68544	1.70033	1.69183	1.71732	1.69443	1.70167	1.69133	1.67371	1.71447	1.68648	1.69762	1.6871	1.6972	1.66931	1.72085	1.6918	1.70176	1.71343	1.72262	1.70861	1.70438	1.70514	1.70811	1.70408	1.72172	1.71069	1.70258	1.71465	1.73131
1375.89	1.6634	1.68068	1.66865	1.65109	1.65202	1.66508	1.67282	1.66252	1.64303	1.67089	1.64663	1.64775	1.66202	1.65372	1.67833	1.65628	1.6636	1.65371	1.63597	1.67501	1.64858	1.65882	1.64847	1.65879	1.63223	1.68098	1.65248	1.66222	1.67421	1.68284	1.66857	1.66577	1.66596	1.66901	1.66504	1.68293	1.6723	1.66316	1.67426	1.69002
1375.14	1.62874	1.64258	1.63276	1.61459	1.61587	1.62888	1.63653	1.62582	1.60747	1.6358	1.61142	1.61271	1.62642	1.61828	1.64202	1.62072	1.62812	1.61863	1.60077	1.63841	1.61334	1.62281	1.61258	1.62307	1.59768	1.6441	1.61589	1.62552	1.63772	1.64582	1.63132	1.62983	1.62949	1.63261	1.62872	1.6468	1.6366	1.6266	1.63681	1.65172
1374.38	1.59643	1.60724	1.59946	1.58069	1.58224	1.59525	1.60278	1.59172	1.57443	1.60318	1.57868	1.58012	1.59334	1.58534	1.60822	1.58759	1.59507	1.58594	1.56795	1.60442	1.58056	1.58938	1.57923	1.58985	1.56548	1.60997	1.5819	1.59144	1.60377	1.61139	1.59667	1.59639	1.59555	1.59875	1.59494	1.61315	1.60338	1.59269	1.60207	1.61622
1373.63	1.56635	1.57453	1.5686	1.54925	1.55104	1.56405	1.57148	1.5601	1.54374	1.57287	1.54824	1.54983	1.56264	1.55472	1.57681	1.55676	1.5643	1.55553	1.53741	1.57291	1.5501	1.55837	1.54831	1.55902	1.5355	1.57842	1.55039	1.55986	1.57227	1.57944	1.56454	1.56535	1.56404	1.5673	1.56358	1.58188	1.57251	1.56128	1.56994	1.58339
1372.87	1.53826	1.5442	1.53994	1.52002	1.52199	1.535	1.54238	1.53067	1.51518	1.54466	1.51991	1.52165	1.53408	1.52623	1.54754	1.528	1.53559	1.52716	1.50891	1.54362	1.52168	1.52955	1.51958	1.5303	1.50753	1.54918	1.52109	1.53054	1.54295	1.54971	1.53466	1.53644	1.5347	1.53801	1.53436	1.55274	1.54375	1.53212	1.54013	1.55296
1372.12	1.51178	1.51585	1.51309	1.49262	1.49473	1.5077	1.51508	1.50305	1.48842	1.51821	1.49338	1.49526	1.50733	1.49955	1.52005	1.50095	1.50855	1.50044	1.4821	1.51623	1.495	1.50254	1.49267	1.50334	1.48123	1.52184	1.4936	1.50305	1.51546	1.52178	1.50664	1.50927	1.50714	1.51048	1.50691	1.52533	1.51673	1.50482	1.51224	1.52451
1371.37	1.48677	1.48921	1.48784	1.46681	1.46905	1.48197	1.48936	1.47704	1.46328	1.49335	1.46845	1.47048	1.48219	1.4745	1.49416	1.47541	1.48304	1.47522	1.45679	1.49054	1.4699	1.47714	1.46736	1.47796	1.45647	1.49618	1.46771	1.47718	1.48958	1.49544	1.48027	1.48366	1.48114	1.4845	1.48104	1.49948	1.49129	1.47918	1.48604	1.49779
1370.61	1.46339	1.4644	1.46429	1.44273	1.44509	1.45794	1.46534	1.45275	1.43982	1.47012	1.44518	1.44734	1.45871	1.4511	1.47001	1.45153	1.4592	1.45163	1.43312	1.46659	1.44652	1.45344	1.44374	1.45428	1.43337	1.47227	1.44355	1.45307	1.46542	1.47083	1.45568	1.45973	1.45686	1.46024	1.45688	1.47531	1.46756	1.45528	1.46162	1.47291
1369.86	1.44174	1.44149	1.44248	1.42047	1.42292	1.43575	1.44315	1.4303	1.41807	1.44856	1.42357	1.42584	1.43689	1.42936	1.44766	1.42942	1.43713	1.4298	1.41119	1.44441	1.4249	1.43152	1.42188	1.43239	1.41202	1.45018	1.42123	1.4308	1.44309	1.44811	1.43298	1.43759	1.43439	1.4378	1.43454	1.45295	1.44561	1.43316	1.4391	1.44997
1369.11	1.42149	1.42016	1.42212	1.39973	1.40224	1.41504	1.42248	1.40934	1.39776	1.42843	1.40338	1.40574	1.41649	1.40904	1.4268	1.40876	1.41651	1.4094	1.39068	1.42371	1.40471	1.41105	1.40148	1.41194	1.39207	1.42957	1.40043	1.41006	1.42227	1.42692	1.41181	1.41692	1.41342	1.41686	1.41367	1.43205	1.42513	1.41254	1.41814	1.42864
1368.36	1.40227	1.40001	1.40286	1.38008	1.38265	1.39543	1.40288	1.3895	1.37855	1.40942	1.38431	1.38676	1.39723	1.38984	1.40706	1.38917	1.39696	1.39005	1.37123	1.40414	1.3856	1.39168	1.38216	1.39258	1.37318	1.41006	1.38073	1.39042	1.40254	1.40682	1.39177	1.39732	1.39354	1.39702	1.39388	1.41222	1.40575	1.39302	1.3983	1.40849
1367.61	1.38422	1.38111	1.38474	1.36159	1.36425	1.37702	1.38446	1.37087	1.36054	1.39158	1.3664	1.36892	1.37912	1.3718	1.38851	1.37075	1.37859	1.37186	1.35295	1.38577	1.36767	1.37348	1.364	1.37441	1.35545	1.39173	1.36222	1.372	1.38401	1.38793	1.37295	1.3789	1.37487	1.37837	1.37528	1.39359	1.38757	1.37469	1.37968	1.38961
1366.87	1.36761	1.36374	1.36801	1.34455	1.34733	1.3601	1.36751	1.35374	1.34387	1.37505	1.3498	1.35238	1.36235	1.35508	1.37141	1.35377	1.36165	1.35509	1.3361	1.36881	1.35113	1.35668	1.34725	1.35767	1.33911	1.37485	1.34521	1.35508	1.36693	1.37058	1.35567	1.36195	1.35769	1.36122	1.35818	1.37645	1.37083	1.35776	1.36257	1.37227
1366.12	1.35214	1.34763	1.35242	1.32874	1.33162	1.3444	1.35179	1.33785	1.32832	1.35961	1.33428	1.33692	1.34668	1.33945	1.35549	1.33797	1.34586	1.33949	1.32042	1.353	1.33568	1.34103	1.33169	1.34207	1.32385	1.35916	1.32944	1.33937	1.35107	1.35451	1.33965	1.3462	1.34171	1.34528	1.3423	1.36049	1.3552	1.342	1.34672	1.35621
1365.37	1.33723	1.33225	1.3375	1.31362	1.31656	1.32934	1.33675	1.32264	1.31342	1.34484	1.31946	1.32216	1.33173	1.32453	1.34025	1.32281	1.33069	1.32451	1.3054	1.33788	1.32083	1.32606	1.3168	1.32709	1.30916	1.34415	1.31436	1.32433	1.33587	1.3391	1.32431	1.33109	1.32636	1.32999	1.32709	1.34516	1.34017	1.32695	1.33156	1.34085
1364.63	1.32293	1.31754	1.32322	1.29913	1.30211	1.31491	1.32234	1.30807	1.29918	1.33074	1.3053	1.30808	1.31744	1.31029	1.32566	1.30827	1.31614	1.31013	1.29099	1.32344	1.30662	1.31172	1.30254	1.31274	1.29509	1.32979	1.29992	1.30993	1.32133	1.32431	1.30961	1.31661	1.31165	1.31534	1.31249	1.33046	1.32578	1.31256	1.31704	1.32616
1363.88	1.30959	1.30382	1.30985	1.28559	1.28863	1.30144	1.3089	1.29447	1.28585	1.31752	1.29202	1.29485	1.30403	1.29693	1.31202	1.29468	1.30256	1.2967	1.27751	1.30994	1.29335	1.29833	1.28922	1.29937	1.28195	1.31638	1.28644	1.2965	1.30774	1.31052	1.2959	1.3031	1.29792	1.30165	1.29886	1.31674	1.31235	1.29913	1.3035	1.31248
1363.14	1.29705	1.29096	1.29728	1.2729	1.27599	1.28881	1.29629	1.28171	1.27329	1.30504	1.27948	1.28238	1.29139	1.28433	1.29919	1.28192	1.28979	1.28407	1.26483	1.29725	1.28085	1.28576	1.27672	1.2868	1.26959	1.30379	1.27382	1.28393	1.295	1.29761	1.28305	1.29043	1.28504	1.28881	1.28607	1.30387	1.29974	1.28652	1.29082	1.29966
1362.4	1.28482	1.27849	1.28509	1.2606	1.26371	1.27651	1.28403	1.26932	1.26112	1.29295	1.26735	1.27033	1.27917	1.27215	1.28673	1.26951	1.27736	1.27177	1.25248	1.28496	1.26868	1.27357	1.26457	1.27458	1.25755	1.29155	1.26156	1.27172	1.28262	1.28504	1.27056	1.27812	1.27252	1.27633	1.27362	1.29135	1.28748	1.27431	1.27852	1.28721
1361.66	1.27287	1.26631	1.27322	1.24857	1.25172	1.26449	1.27203	1.2572	1.24929	1.28121	1.25561	1.25865	1.26731	1.26033	1.27459	1.25737	1.26524	1.25977	1.24043	1.27302	1.25688	1.26169	1.25273	1.26269	1.24584	1.27961	1.24956	1.25979	1.27055	1.27271	1.25834	1.26609	1.26026	1.26414	1.26146	1.27911	1.27556	1.26243	1.26648	1.27503
1360.91	1.26156	1.25473	1.26195	1.23711	1.24034	1.25308	1.26062	1.24568	1.23804	1.27007	1.24444	1.24755	1.25602	1.24907	1.2631	1.24584	1.25374	1.24838	1.229	1.26169	1.24576	1.2504	1.24148	1.25144	1.2348	1.26829	1.23815	1.24847	1.25908	1.26098	1.24674	1.25465	1.24864	1.25258	1.24993	1.2675	1.2643	1.25114	1.25503	1.26349
1360.17	1.25095	1.24383	1.25132	1.22633	1.22966	1.24239	1.2499	1.23485	1.22741	1.25953	1.23386	1.23702	1.24531	1.23839	1.2523	1.23501	1.24295	1.23768	1.21824	1.25098	1.23532	1.23978	1.23089	1.24087	1.22445	1.25763	1.22743	1.23783	1.24829	1.24998	1.23585	1.2439	1.23775	1.24171	1.23911	1.2566	1.25371	1.24049	1.24427	1.25267
1359.43	1.24075	1.23336	1.2411	1.21599	1.2194	1.23212	1.23963	1.22445	1.21718	1.24938	1.22368	1.22685	1.23499	1.22811	1.2419	1.22461	1.23258	1.22741	1.20792	1.24067	1.22525	1.22956	1.22072	1.23069	1.21447	1.24739	1.21715	1.22762	1.23794	1.23944	1.22538	1.23359	1.22729	1.23129	1.22873	1.24612	1.24352	1.23025	1.23395	1.24229
1358.7	1.23075	1.22315	1.23112	1.2059	1.20937	1.22209	1.2296	1.21429	1.20719	1.23947	1.21373	1.21694	1.22494	1.21808	1.23175	1.21447	1.22245	1.21738	1.19785	1.23059	1.21539	1.21957	1.2108	1.22074	1.20467	1.2374	1.20713	1.21765	1.22784	1.22916	1.21516	1.22353	1.21708	1.22112	1.2186	1.23588	1.23354	1.22027	1.22388	1.23214
1357.96	1.22097	1.21318	1.22136	1.19606	1.19956	1.21228	1.2198	1.20438	1.19743	1.22978	1.20401	1.20726	1.21513	1.20831	1.22182	1.20456	1.21254	1.20758	1.188	1.22075	1.20572	1.20983	1.20111	1.211	1.19508	1.22764	1.19735	1.2079	1.21798	1.21912	1.20517	1.2137	1.20711	1.21118	1.2087	1.22588	1.22378	1.21053	1.21405	1.22224
1357.22	1.21138	1.20343	1.21181	1.18644	1.18995	1.20267	1.21021	1.19467	1.18787	1.22029	1.19448	1.19779	1.20553	1.19874	1.2121	1.19485	1.20282	1.19797	1.17836	1.21113	1.19622	1.20029	1.19163	1.20146	1.18566	1.2181	1.18777	1.19837	1.20833	1.2093	1.1954	1.20408	1.19735	1.20146	1.19902	1.2161	1.21422	1.20102	1.20444	1.21254
1356.48	1.2019	1.19378	1.20238	1.17693	1.18044	1.19316	1.20073	1.18508	1.17843	1.21093	1.18506	1.18843	1.19606	1.18929	1.20249	1.18525	1.19322	1.18847	1.16883	1.20166	1.18682	1.19088	1.18227	1.19202	1.17634	1.20869	1.17829	1.18894	1.1988	1.19958	1.18574	1.19457	1.18771	1.19185	1.18945	1.20644	1.20476	1.19162	1.19494	1.20296
1355.75	1.19246	1.18419	1.193	1.16746	1.17098	1.18369	1.19127	1.17552	1.16905	1.20163	1.17572	1.17914	1.18666	1.17992	1.19294	1.1757	1.18367	1.17901	1.15935	1.19225	1.17748	1.18151	1.17296	1.18264	1.16706	1.19933	1.16886	1.17955	1.18932	1.18989	1.17611	1.1851	1.1781	1.18228	1.17991	1.19683	1.19536	1.18229	1.18549	1.19341
1355.01	1.18308	1.17465	1.18369	1.15804	1.16158	1.1743	1.18188	1.16603	1.15975	1.1924	1.16646	1.16992	1.17733	1.17062	1.18347	1.16622	1.17419	1.16962	1.14993	1.18292	1.16825	1.17222	1.16371	1.17335	1.15788	1.19004	1.15948	1.17023	1.17989	1.18025	1.16655	1.1757	1.16857	1.17279	1.17045	1.18728	1.18606	1.17303	1.17609	1.18393
1354.28	1.17383	1.16523	1.1745	1.14873	1.15232	1.16505	1.1726	1.15667	1.15057	1.18329	1.15732	1.16081	1.16811	1.16144	1.17412	1.15687	1.16485	1.16035	1.14065	1.1737	1.15918	1.16305	1.15458	1.1642	1.14885	1.18088	1.15022	1.16102	1.17059	1.17074	1.15711	1.16644	1.15916	1.16342	1.16112	1.17785	1.17688	1.16388	1.16681	1.17458
1353.55	1.16468	1.15593	1.16542	1.13954	1.14317	1.15591	1.16345	1.14743	1.1415	1.17429	1.14829	1.15181	1.15898	1.15235	1.16489	1.14763	1.15563	1.15121	1.13148	1.16457	1.15022	1.154	1.14557	1.15516	1.13992	1.17183	1.14108	1.15193	1.1614	1.16138	1.1478	1.15729	1.14988	1.15418	1.1519	1.16854	1.16782	1.15484	1.15766	1.16536
1352.81	1.15557	1.14667	1.15639	1.13039	1.13406	1.14681	1.15435	1.13823	1.13245	1.16531	1.13928	1.14285	1.14989	1.1433	1.1557	1.13841	1.14645	1.14212	1.12234	1.15548	1.14128	1.14498	1.1366	1.14614	1.13102	1.16281	1.13199	1.14288	1.15225	1.15206	1.13853	1.14818	1.14065	1.14498	1.14273	1.15928	1.15879	1.14583	1.14855	1.15618
1352.08	1.14642	1.13737	1.14732	1.12121	1.12491	1.13766	1.14521	1.12898	1.12338	1.15631	1.13022	1.13385	1.14077	1.13422	1.14647	1.12916	1.13723	1.133	1.11317	1.14634	1.13227	1.13593	1.12759	1.13708	1.12205	1.15375	1.12286	1.1338	1.14306	1.14271	1.12924	1.13903	1.13138	1.13573	1.13352	1.14998	1.14971	1.13678	1.1394	1.14696
1351.35	1.13722	1.12802	1.1382	1.11197	1.11571	1.12845	1.13602	1.11968	1.11426	1.14725	1.12113	1.1248	1.1316	1.12509	1.13719	1.11987	1.12796	1.12383	1.10396	1.13716	1.12321	1.12681	1.11853	1.12797	1.11303	1.14463	1.11368	1.12468	1.13383	1.13331	1.1199	1.12982	1.12205	1.12644	1.12427	1.14063	1.14058	1.12769	1.1302	1.13769
1350.62	1.12799	1.11864	1.12904	1.10271	1.10648	1.11922	1.1268	1.11035	1.1051	1.13816	1.112	1.11571	1.1224	1.11591	1.12788	1.11055	1.11866	1.11462	1.09471	1.12795	1.1141	1.11766	1.10942	1.11881	1.10397	1.13549	1.10448	1.11551	1.12456	1.12388	1.11052	1.12058	1.11269	1.11711	1.11497	1.13125	1.1314	1.11856	1.12096	1.12839
1349.89	1.11873	1.10923	1.11983	1.09342	1.09721	1.10995	1.11755	1.101	1.0959	1.12903	1.10283	1.10657	1.11314	1.10669	1.11852	1.1012	1.10932	1.10537	1.08542	1.1187	1.10496	1.10848	1.10028	1.10962	1.09487	1.1263	1.09523	1.1063	1.11526	1.11441	1.10111	1.1113	1.1033	1.10773	1.10564	1.12181	1.12218	1.1094	1.11168	1.11906
1349.16	1.1094	1.09977	1.11056	1.08407	1.08788	1.10062	1.10823	1.09158	1.08662	1.11983	1.09359	1.09736	1.10383	1.09742	1.1091	1.09179	1.09991	1.09606	1.07607	1.10938	1.09575	1.09923	1.09108	1.10035	1.0857	1.11706	1.08592	1.09703	1.1059	1.10488	1.09163	1.10195	1.09384	1.0983	1.09623	1.11232	1.11289	1.10016	1.10234	1.10966
1348.44	1.09998	1.09022	1.10119	1.07464	1.07847	1.09119	1.09882	1.08208	1.07726	1.11053	1.08426	1.08807	1.09442	1.08806	1.09959	1.08229	1.0904	1.08666	1.06663	1.09997	1.08644	1.0899	1.08179	1.091	1.07644	1.10773	1.07652	1.08767	1.09645	1.09527	1.08205	1.09251	1.0843	1.08877	1.08674	1.10273	1.10352	1.09083	1.09292	1.10018
1347.71	1.09046	1.0806	1.09174	1.06512	1.06897	1.08168	1.08932	1.07249	1.06781	1.10115	1.07484	1.07869	1.08493	1.07862	1.08999	1.0727	1.08081	1.07717	1.05711	1.09048	1.07705	1.08047	1.07242	1.08156	1.0671	1.09831	1.06703	1.07822	1.08691	1.08556	1.07239	1.08299	1.07466	1.07916	1.07716	1.09305	1.09406	1.08142	1.0834	1.0906
1346.98	1.08088	1.07091	1.08221	1.05552	1.05939	1.0721	1.07976	1.06283	1.0583	1.09169	1.06534	1.06924	1.07536	1.06911	1.08034	1.06304	1.07115	1.0676	1.04751	1.08091	1.06759	1.07098	1.06297	1.07204	1.05769	1.08881	1.05748	1.0687	1.0773	1.0758	1.06268	1.07342	1.06496	1.06948	1.06751	1.0833	1.08452	1.07194	1.07382	1.08096
1346.26	1.07124	1.06116	1.07263	1.04586	1.04976	1.06248	1.07015	1.05311	1.04872	1.08218	1.05578	1.05972	1.06572	1.05952	1.07063	1.05332	1.06144	1.05797	1.03785	1.07128	1.05807	1.06142	1.05346	1.06247	1.04821	1.07924	1.04787	1.05914	1.06763	1.06599	1.05292	1.0638	1.05521	1.05975	1.05782	1.07349	1.07492	1.06241	1.06418	1.07127
1345.53	1.06153	1.05134	1.06299	1.03613	1.04005	1.05277	1.06048	1.04333	1.03906	1.07258	1.04614	1.05012	1.056	1.04985	1.06085	1.04352	1.05165	1.04827	1.02813	1.06157	1.04846	1.05178	1.04387	1.05281	1.03865	1.0696	1.03819	1.04951	1.05788	1.05612	1.04309	1.05411	1.04538	1.04995	1.04805	1.06361	1.06524	1.05279	1.05448	1.06151
1344.81	1.05172	1.04142	1.05324	1.0263	1.03025	1.04297	1.05071	1.03346	1.02931	1.0629	1.0364	1.04042	1.0462	1.04009	1.05096	1.03362	1.04177	1.03848	1.01831	1.05176	1.03876	1.04205	1.03418	1.04305	1.02899	1.05986	1.02842	1.03979	1.04804	1.04615	1.03316	1.04431	1.03546	1.04005	1.03819	1.05363	1.05545	1.04308	1.04468	1.05166
1344.09	1.04182	1.03142	1.04341	1.01638	1.02036	1.03309	1.04085	1.02349	1.01947	1.05312	1.02658	1.03065	1.03631	1.03024	1.04098	1.02366	1.03181	1.02862	1.00841	1.04186	1.02895	1.03222	1.02441	1.0332	1.01925	1.05003	1.01856	1.02998	1.03811	1.03609	1.02314	1.03442	1.02546	1.03007	1.02824	1.04356	1.04558	1.03327	1.03479	1.04172
1343.36	1.03185	1.02136	1.0335	1.00639	1.01042	1.02316	1.03093	1.01347	1.00957	1.04328	1.01669	1.0208	1.02636	1.02033	1.03094	1.01363	1.02178	1.01869	0.998442	1.0319	1.01907	1.02232	1.01457	1.02328	1.00943	1.04013	1.00864	1.0201	1.02812	1.02596	1.01306	1.02447	1.01539	1.02002	1.01822	1.03343	1.03563	1.0234	1.02483	1.03172
1342.64	1.02183	1.01124	1.02354	0.996354	1.00042	1.01317	1.02095	1.00338	0.999596	1.03338	1.00674	1.01089	1.01635	1.01036	1.02085	1.00355	1.01169	1.0087	0.988424	1.02188	1.00912	1.01237	1.00467	1.0133	0.999553	1.03017	0.998676	1.01016	1.01808	1.01577	1.00293	1.01446	1.00526	1.00992	1.00815	1.02324	1.02562	1.01346	1.01483	1.02168
1341.92	1.01176	1.00106	1.01353	0.986276	0.99038	1.00314	1.01093	0.993251	0.98957	1.02342	0.996734	1.00093	1.00629	1.00035	1.01072	0.99343	1.00155	0.998654	0.978352	1.01181	0.99912	1.00236	0.994718	1.00327	0.989617	1.02016	0.988658	1.00017	1.00799	1.00555	0.992759	1.0044	0.995083	0.999778	0.998036	1.01299	1.01556	1.00348	1.00477	1.01158
1341.2	1.00165	0.990833	1.00346	0.976151	0.980282	0.993049	1.00086	0.983078	0.979494	1.0134	0.986677	0.99091	0.996175	0.990293	1.00053	0.983254	0.991356	0.988566	0.96823	1.00168	0.989066	0.992304	0.984721	0.99318	0.979624	1.0101	0.978592	0.990134	0.997839	0.995275	0.98254	0.994295	0.984861	0.989583	0.98787	1.00269	1.00545	0.993449	0.994668	1.00143
1340.48	0.99149	0.980569	0.993342	0.965981	0.970138	0.982909	0.990747	0.972865	0.969379	1.00334	0.976578	0.980859	0.986022	0.980193	0.990311	0.973031	0.981123	0.978439	0.958067	0.991499	0.978968	0.982206	0.974681	0.983046	0.969588	0.999997	0.968484	0.980053	0.987653	0.984962	0.972272	0.984147	0.974602	0.979347	0.977662	0.992349	0.995299	0.983378	0.984513	0.991243
1339.76	0.981297	0.970287	0.983202	0.955781	0.959965	0.972738	0.980611	0.962619	0.959239	0.993254	0.966453	0.970786	0.975838	0.970062	0.980061	0.962778	0.970865	0.968283	0.947881	0.981293	0.968837	0.972077	0.96461	0.972891	0.959522	0.989865	0.95835	0.969942	0.977446	0.974624	0.961973	0.973971	0.964317	0.969083	0.967425	0.981984	0.985117	0.973281	0.974325	0.981022
1339.05	0.971084	0.959998	0.973055	0.945576	0.949787	0.962562	0.970465	0.952359	0.949089	0.983157	0.956318	0.960706	0.965639	0.959919	0.969797	0.952515	0.960598	0.958114	0.937686	0.971074	0.958689	0.961938	0.954524	0.962728	0.949444	0.979717	0.948199	0.959818	0.967232	0.964278	0.951662	0.963788	0.954021	0.958807	0.95718	0.971611	0.974918	0.963172	0.964126	0.970792
1338.33	0.960869	0.949704	0.962915	0.93538	0.939615	0.952389	0.960318	0.942102	0.938936	0.973062	0.946181	0.950626	0.955439	0.949781	0.959533	0.942258	0.950333	0.947946	0.927491	0.960854	0.948539	0.951802	0.944441	0.95256	0.939359	0.969567	0.93804	0.949696	0.957018	0.953932	0.941353	0.953612	0.943725	0.948529	0.94694	0.961236	0.96471	0.953062	0.953931	0.960557
1337.61	0.950665	0.939413	0.952783	0.925191	0.929445	0.942219	0.95017	0.931852	0.928786	0.962972	0.936055	0.940549	0.945248	0.939654	0.949278	0.932008	0.940075	0.937789	0.917301	0.950643	0.938402	0.941673	0.934366	0.942393	0.929276	0.959424	0.927881	0.939584	0.946806	0.943591	0.931048	0.943442	0.933436	0.938256	0.936708	0.950871	0.954504	0.942955	0.943743	0.950322
1336.9	0.940485	0.929134	0.94267	0.915011	0.919284	0.932061	0.940032	0.921615	0.918651	0.952898	0.925946	0.930486	0.935078	0.929542	0.939042	0.921773	0.929833	0.92765	0.907128	0.940451	0.928284	0.931554	0.924309	0.932237	0.919209	0.949297	0.91774	0.929492	0.936604	0.933264	0.920756	0.933283	0.923164	0.928001	0.926492	0.940524	0.944315	0.932863	0.93357	0.940099
1336.18	0.930341	0.918888	0.93259	0.90485	0.909152	0.921931	0.929927	0.911402	0.908552	0.942853	0.91587	0.92045	0.924942	0.919458	0.928835	0.911569	0.919624	0.91754	0.896985	0.930289	0.91819	0.92146	0.914279	0.92211	0.909172	0.939199	0.907634	0.919428	0.926428	0.922969	0.910495	0.923152	0.912925	0.917778	0.916302	0.930212	0.934155	0.922798	0.923423	0.929902
1335.47	0.920245	0.908688	0.922557	0.894731	0.899069	0.911851	0.919873	0.901231	0.898502	0.932853	0.905836	0.910459	0.914851	0.909419	0.91867	0.901415	0.909463	0.907473	0.886886	0.920175	0.908134	0.91141	0.904289	0.912027	0.899181	0.929149	0.897574	0.909402	0.916296	0.912723	0.900281	0.913064	0.902731	0.907604	0.906158	0.919946	0.924039	0.912777	0.913316	0.919748
1334.76	0.910211	0.898549	0.912581	0.884676	0.889051	0.901835	0.90988	0.891122	0.888512	0.922913	0.895855	0.900525	0.904813	0.899442	0.908564	0.891324	0.899359	0.897465	0.876843	0.910123	0.898137	0.901424	0.894354	0.902002	0.889248	0.919164	0.887569	0.899424	0.906226	0.902537	0.890126	0.903038	0.8926	0.897492	0.896073	0.909739	0.91398	0.902815	0.903269	0.909654
1334.04	0.900247	0.888478	0.90267	0.874697	0.879101	0.891885	0.899952	0.881089	0.878584	0.913042	0.885936	0.89066	0.894841	0.889539	0.898528	0.881304	0.889323	0.887532	0.866868	0.900143	0.888212	0.891507	0.884486	0.892045	0.879385	0.909249	0.877626	0.889511	0.896226	0.892419	0.880042	0.893088	0.88254	0.887447	0.886056	0.8996	0.903985	0.892923	0.89329	0.899628
1333.33	0.890357	0.87848	0.892833	0.864798	0.869223	0.882008	0.890096	0.871135	0.868728	0.903246	0.876092	0.88087	0.884948	0.879712	0.888572	0.871355	0.879363	0.877679	0.856971	0.890236	0.878366	0.881662	0.874691	0.882161	0.869596	0.899407	0.867753	0.879674	0.886299	0.882375	0.870032	0.883215	0.87256	0.877477	0.876115	0.88954	0.894064	0.883106	0.883386	0.889679
1332.62	0.88055	0.868562	0.883079	0.854981	0.859427	0.872207	0.880322	0.861262	0.858955	0.893531	0.866332	0.871161	0.875146	0.869967	0.878698	0.861489	0.86949	0.867912	0.847161	0.880412	0.868601	0.871896	0.864976	0.87236	0.859887	0.889642	0.857961	0.869922	0.876452	0.87241	0.860102	0.873421	0.862664	0.867592	0.866256	0.879572	0.884229	0.873373	0.873562	0.879809
1331.91	0.87084	0.858735	0.87342	0.845254	0.849723	0.862496	0.87064	0.851477	0.84928	0.883911	0.856669	0.861544	0.865443	0.860314	0.868915	0.85172	0.859717	0.858236	0.83745	0.87068	0.858925	0.862222	0.855353	0.862658	0.850268	0.879967	0.848263	0.860262	0.866698	0.862534	0.85026	0.863712	0.85286	0.8578	0.856492	0.869705	0.874496	0.863732	0.863829	0.870029
1331.2	0.861239	0.849015	0.863865	0.835631	0.840122	0.852889	0.861058	0.841794	0.839714	0.874396	0.847113	0.852032	0.855844	0.850766	0.859237	0.842057	0.850055	0.848659	0.827845	0.861055	0.849349	0.852655	0.845838	0.853066	0.840754	0.870398	0.838672	0.850702	0.857055	0.852767	0.840524	0.854104	0.843161	0.848113	0.846837	0.859947	0.864869	0.854194	0.854205	0.860351
1330.49	0.851755	0.839413	0.854428	0.826125	0.830639	0.843403	0.851594	0.83223	0.830268	0.864996	0.837674	0.842636	0.846357	0.841334	0.849678	0.832511	0.840512	0.839196	0.818356	0.851547	0.839889	0.843208	0.836443	0.843591	0.831354	0.860948	0.829198	0.841257	0.847534	0.843128	0.830909	0.844613	0.833576	0.838543	0.837302	0.850301	0.855353	0.844772	0.844701	0.85079
1329.79	0.842394	0.829937	0.845114	0.816745	0.82128	0.834045	0.842257	0.822794	0.820945	0.85571	0.828363	0.833359	0.836989	0.832023	0.840248	0.82309	0.831094	0.829856	0.808991	0.842165	0.830556	0.833882	0.827171	0.834233	0.822078	0.851619	0.819847	0.831935	0.838134	0.833622	0.821422	0.83525	0.824118	0.829099	0.827891	0.840773	0.845955	0.835469	0.835321	0.841358
1329.08	0.833162	0.820586	0.835924	0.80749	0.812047	0.824818	0.833051	0.813486	0.811746	0.846546	0.81918	0.824206	0.82775	0.822838	0.830948	0.813798	0.821804	0.820649	0.799753	0.832912	0.821355	0.824678	0.818021	0.824998	0.812929	0.842416	0.81062	0.822742	0.828852	0.824246	0.812061	0.826016	0.814792	0.819787	0.818604	0.831375	0.836688	0.826286	0.826063	0.832057
1328.37	0.824064	0.811367	0.826867	0.798363	0.802944	0.815725	0.823979	0.804308	0.802676	0.837515	0.810126	0.815186	0.818642	0.813788	0.821782	0.804642	0.812643	0.811579	0.790645	0.823793	0.812289	0.815604	0.808996	0.815895	0.803911	0.833346	0.801523	0.813681	0.819695	0.814997	0.802834	0.816915	0.805601	0.810606	0.809448	0.822113	0.827559	0.81723	0.816935	0.822892
1327.67	0.815108	0.802294	0.817952	0.789374	0.793981	0.80677	0.815043	0.795271	0.793746	0.82863	0.801205	0.806313	0.809678	0.804878	0.812755	0.795628	0.803619	0.802647	0.781676	0.814811	0.803361	0.806671	0.800109	0.806935	0.795031	0.824418	0.792568	0.80476	0.810681	0.805887	0.793749	0.807955	0.796552	0.801561	0.800433	0.812994	0.818571	0.808316	0.807947	0.813866
1326.96	0.806297	0.793376	0.809186	0.780533	0.785167	0.79796	0.806251	0.786384	0.784965	0.819894	0.792428	0.797588	0.80086	0.796114	0.803874	0.786759	0.794736	0.793856	0.772852	0.805973	0.794573	0.797886	0.791369	0.798123	0.786298	0.815641	0.78376	0.795986	0.801823	0.796928	0.784817	0.799143	0.787648	0.792657	0.791567	0.804022	0.809725	0.799555	0.79911	0.804984
1326.26	0.797635	0.784614	0.800569	0.771843	0.776504	0.789297	0.797607	0.777649	0.776331	0.811306	0.783802	0.789007	0.792192	0.787496	0.795142	0.778039	0.786005	0.785212	0.764177	0.797285	0.785932	0.789247	0.782776	0.78946	0.777714	0.807008	0.775101	0.787362	0.793119	0.788127	0.776035	0.790482	0.778893	0.783904	0.782848	0.795205	0.801028	0.790943	0.790426	0.796252
1325.56	0.789126	0.776003	0.792099	0.763301	0.767994	0.780783	0.789114	0.769065	0.767846	0.802864	0.775329	0.780569	0.783673	0.779027	0.786562	0.769471	0.777431	0.776717	0.755652	0.788752	0.777442	0.780752	0.77433	0.780946	0.769281	0.798518	0.76659	0.778889	0.784562	0.779484	0.767406	0.781969	0.770288	0.775307	0.774277	0.786545	0.792483	0.782475	0.781894	0.787676
1324.85	0.780776	0.767542	0.783779	0.75491	0.759635	0.772425	0.780774	0.760634	0.759513	0.794572	0.767009	0.772281	0.775307	0.770711	0.778138	0.761058	0.769016	0.768374	0.74728	0.780374	0.76911	0.772408	0.766031	0.772586	0.760998	0.790175	0.75823	0.770566	0.776154	0.770995	0.758932	0.773607	0.761838	0.766872	0.765861	0.778044	0.784094	0.774152	0.773513	0.77926
1324.15	0.772586	0.75924	0.775616	0.746679	0.751431	0.764228	0.772591	0.752361	0.751336	0.786435	0.75884	0.764151	0.767097	0.762557	0.769874	0.752801	0.760757	0.760184	0.739063	0.772153	0.760931	0.76422	0.75789	0.764382	0.752867	0.781991	0.750028	0.762398	0.767905	0.762662	0.750619	0.765401	0.753549	0.758595	0.757605	0.769697	0.775857	0.765983	0.765287	0.771005
1323.45	0.764554	0.751103	0.767615	0.738617	0.74339	0.756196	0.76457	0.744254	0.743321	0.778459	0.750827	0.756184	0.759046	0.754562	0.761771	0.744707	0.752659	0.752153	0.731009	0.764087	0.752906	0.756198	0.749913	0.756337	0.744892	0.773975	0.741991	0.754391	0.759821	0.754495	0.742475	0.757358	0.745423	0.750478	0.749512	0.761507	0.767778	0.757979	0.757226	0.762913
1322.75	0.756684	0.743135	0.759781	0.730727	0.735521	0.748329	0.756718	0.736321	0.735467	0.770648	0.742979	0.748378	0.751157	0.746724	0.753834	0.73678	0.744727	0.744289	0.723124	0.756184	0.745042	0.748343	0.7421	0.748454	0.737083	0.766125	0.734121	0.74655	0.751907	0.746496	0.734503	0.749481	0.737465	0.742525	0.741585	0.753482	0.759862	0.750144	0.749334	0.754987
1322.05	0.748982	0.735338	0.752111	0.723002	0.727821	0.740628	0.749032	0.728561	0.727775	0.763002	0.735296	0.740732	0.743428	0.739045	0.746063	0.729022	0.736964	0.736597	0.715405	0.748447	0.737346	0.740649	0.734448	0.740737	0.729441	0.758436	0.726416	0.738876	0.744159	0.738665	0.7267	0.74177	0.729675	0.734741	0.733823	0.74563	0.752116	0.742472	0.741609	0.747225
1321.35	0.741452	0.72771	0.744603	0.715435	0.720285	0.733091	0.741509	0.720966	0.720245	0.755518	0.727776	0.733244	0.735865	0.731531	0.738459	0.721429	0.729366	0.729073	0.707849	0.740877	0.72982	0.733115	0.726951	0.733184	0.721968	0.750906	0.718874	0.731368	0.736571	0.730996	0.71906	0.734221	0.722052	0.727125	0.726229	0.737954	0.744538	0.734962	0.734046	0.73963
1320.66	0.734093	0.720254	0.737258	0.708028	0.71291	0.725718	0.734149	0.713531	0.71288	0.748195	0.720419	0.725919	0.728471	0.724186	0.731027	0.713999	0.721933	0.721712	0.700457	0.733475	0.722463	0.725743	0.719615	0.725797	0.714659	0.743538	0.711499	0.724025	0.729147	0.723495	0.711583	0.726835	0.714592	0.719673	0.718801	0.730449	0.737127	0.727613	0.726647	0.732203
1319.96	0.7269	0.712973	0.730081	0.700793	0.705701	0.718513	0.72696	0.706264	0.705685	0.741034	0.713227	0.718759	0.721246	0.717008	0.723767	0.706735	0.714667	0.714512	0.693233	0.726238	0.715274	0.71854	0.712449	0.718578	0.707514	0.736337	0.704294	0.716849	0.721892	0.716172	0.704276	0.719617	0.707299	0.712387	0.711543	0.723111	0.72988	0.720428	0.719416	0.724947
1319.26	0.719873	0.705864	0.723075	0.693737	0.698668	0.711479	0.719947	0.699172	0.69866	0.734039	0.706206	0.711766	0.714189	0.709996	0.716681	0.699646	0.707574	0.707479	0.686183	0.71917	0.708252	0.711512	0.705457	0.71153	0.700535	0.729308	0.69726	0.709842	0.714812	0.70903	0.697146	0.712575	0.700178	0.705275	0.704453	0.715941	0.7228	0.713413	0.712358	0.717861
1318.57	0.71301	0.698923	0.716237	0.686855	0.691807	0.704616	0.713106	0.692255	0.691804	0.727212	0.699356	0.704942	0.707299	0.703151	0.709763	0.692731	0.700655	0.700619	0.679304	0.712274	0.701395	0.704654	0.698637	0.704653	0.693722	0.722451	0.690396	0.703004	0.707903	0.702058	0.690193	0.705708	0.693235	0.698339	0.697534	0.708942	0.715889	0.706567	0.705475	0.710945
1317.87	0.706311	0.69215	0.709563	0.680137	0.685113	0.69792	0.706432	0.685506	0.685111	0.720552	0.692673	0.698288	0.700578	0.696474	0.703012	0.685987	0.693904	0.693931	0.672591	0.705549	0.6947	0.697962	0.691982	0.697942	0.687076	0.715758	0.6837	0.696332	0.701163	0.69525	0.68341	0.699009	0.686464	0.691574	0.690783	0.702113	0.709146	0.69989	0.69876	0.704198
1317.18	0.699774	0.685546	0.703052	0.673579	0.678583	0.691391	0.69992	0.678921	0.678584	0.714058	0.686157	0.691803	0.694026	0.689967	0.696427	0.679406	0.687317	0.687408	0.666039	0.69899	0.688167	0.691433	0.685492	0.691395	0.680592	0.709231	0.677169	0.689824	0.694586	0.688606	0.67679	0.692473	0.679856	0.684972	0.684198	0.695449	0.702567	0.69338	0.692209	0.697619
1316.48	0.693402	0.679108	0.696708	0.667188	0.672219	0.685027	0.693574	0.672503	0.672225	0.707731	0.679805	0.685483	0.687641	0.683628	0.69001	0.672987	0.680896	0.681045	0.659651	0.692595	0.681796	0.685068	0.679166	0.685009	0.674269	0.702868	0.670803	0.68348	0.688177	0.682135	0.670337	0.686098	0.673411	0.678532	0.677781	0.688951	0.696153	0.687037	0.685821	0.691204
1315.79	0.687203	0.672835	0.690529	0.660965	0.666018	0.678825	0.687392	0.666253	0.666033	0.701569	0.673618	0.679325	0.681422	0.67745	0.683757	0.666728	0.67464	0.674839	0.653427	0.686364	0.675591	0.678867	0.673002	0.678788	0.668109	0.696667	0.664598	0.677298	0.681934	0.675837	0.664051	0.679886	0.667131	0.672255	0.671528	0.682628	0.689905	0.680855	0.679597	0.684951
1315.1	0.681173	0.666719	0.684509	0.654905	0.659975	0.67278	0.681367	0.660163	0.66	0.695567	0.667592	0.673322	0.675363	0.67143	0.677663	0.660628	0.668547	0.668794	0.647361	0.680296	0.66955	0.672826	0.666993	0.672733	0.662109	0.690623	0.658553	0.671275	0.675855	0.669699	0.657928	0.673835	0.661014	0.666141	0.665434	0.676476	0.683824	0.674831	0.673535	0.678857
1314.41	0.675308	0.660761	0.678643	0.649	0.654088	0.666893	0.675496	0.654227	0.654123	0.689722	0.661726	0.667478	0.669467	0.665568	0.671728	0.654691	0.662614	0.662914	0.641454	0.674389	0.663671	0.666943	0.661137	0.666841	0.656269	0.684734	0.652666	0.665411	0.669932	0.663712	0.651959	0.667941	0.655058	0.660189	0.659501	0.670488	0.677905	0.668963	0.667631	0.672923
1313.72	0.669599	0.654961	0.672932	0.64325	0.648357	0.661166	0.66978	0.648449	0.648405	0.684033	0.656016	0.661792	0.66373	0.659864	0.665953	0.648918	0.656841	0.657196	0.635706	0.668639	0.657948	0.661216	0.655437	0.661108	0.650587	0.679007	0.646936	0.659705	0.664168	0.657879	0.646145	0.662204	0.649261	0.654399	0.65373	0.664656	0.672143	0.663253	0.661881	0.667147
1313.03	0.66404	0.649321	0.667382	0.637658	0.642785	0.655599	0.664221	0.642831	0.642845	0.6785	0.650461	0.656264	0.658149	0.654318	0.660338	0.643309	0.651228	0.651636	0.63012	0.663047	0.652382	0.655649	0.649897	0.655529	0.645058	0.673443	0.641365	0.654155	0.658561	0.652208	0.640491	0.656627	0.643622	0.648769	0.64812	0.65898	0.666535	0.657702	0.656286	0.661529
1312.34	0.658631	0.643841	0.661992	0.632225	0.637371	0.650186	0.658822	0.637372	0.637443	0.673125	0.645063	0.65089	0.65272	0.648927	0.654882	0.637857	0.645774	0.646229	0.624694	0.657611	0.64697	0.65024	0.644517	0.650102	0.639682	0.668038	0.635948	0.648759	0.653114	0.646703	0.635	0.651209	0.638144	0.643297	0.642667	0.653461	0.66108	0.652308	0.650847	0.656067
1311.65	0.653373	0.63852	0.656761	0.626948	0.632109	0.644924	0.65358	0.632069	0.632195	0.667905	0.639822	0.64567	0.647444	0.643689	0.649581	0.632557	0.640472	0.640974	0.619423	0.652327	0.641711	0.644985	0.63929	0.644824	0.634456	0.662787	0.630682	0.643516	0.647822	0.641357	0.629668	0.645946	0.632827	0.637978	0.637366	0.648098	0.655775	0.647066	0.645569	0.650762
1310.96	0.648262	0.633352	0.651681	0.62182	0.626996	0.639812	0.648487	0.626915	0.627093	0.662835	0.634732	0.640601	0.642319	0.638603	0.644431	0.627405	0.63532	0.635867	0.614299	0.647189	0.6366	0.639878	0.634211	0.639693	0.629378	0.657684	0.625563	0.638425	0.642678	0.636159	0.624486	0.64083	0.627665	0.632811	0.632214	0.642883	0.650617	0.641974	0.640446	0.645611
1310.27	0.643295	0.628331	0.646745	0.616836	0.622026	0.634845	0.643536	0.621904	0.622134	0.657906	0.629783	0.635675	0.637341	0.633663	0.639428	0.622397	0.630313	0.6309	0.609318	0.642195	0.631636	0.634912	0.629274	0.634707	0.624445	0.652725	0.620586	0.633478	0.637674	0.631101	0.619444	0.635855	0.622644	0.627788	0.627205	0.637811	0.645606	0.637027	0.635466	0.640606
1309.59	0.638472	0.623448	0.641945	0.611992	0.617198	0.630019	0.63872	0.617032	0.617313	0.653113	0.624969	0.630887	0.632504	0.628862	0.634563	0.617528	0.625445	0.626071	0.604476	0.637347	0.626816	0.630083	0.624475	0.629865	0.619655	0.647904	0.615748	0.628664	0.632804	0.626184	0.614538	0.631016	0.617754	0.622902	0.622332	0.632883	0.640745	0.632217	0.630619	0.635739
1308.9	0.633792	0.618698	0.637279	0.607285	0.612508	0.625328	0.634038	0.6123	0.612631	0.648453	0.620287	0.626231	0.627805	0.624192	0.629834	0.612796	0.620714	0.621376	0.599771	0.632641	0.622133	0.625392	0.619811	0.625164	0.615004	0.643219	0.611046	0.62398	0.628072	0.621411	0.609773	0.626318	0.612997	0.618153	0.617596	0.6281	0.636031	0.627542	0.625906	0.631007
1308.22	0.629249	0.614082	0.632747	0.602715	0.607955	0.620769	0.629491	0.607706	0.60809	0.64393	0.615742	0.62171	0.623242	0.619656	0.625239	0.6082	0.61612	0.61682	0.595199	0.628067	0.617584	0.62084	0.615284	0.620599	0.610486	0.638667	0.60648	0.619432	0.623483	0.61678	0.605151	0.621759	0.60838	0.613546	0.612999	0.623459	0.631453	0.623001	0.621331	0.62641
1307.53	0.624834	0.609605	0.62835	0.598278	0.603536	0.616342	0.625079	0.603246	0.603687	0.639543	0.611335	0.617325	0.618816	0.615258	0.620778	0.603741	0.611664	0.612402	0.590761	0.623623	0.613164	0.616427	0.610891	0.616165	0.606096	0.63425	0.602054	0.615025	0.619035	0.612289	0.600667	0.617335	0.603904	0.609078	0.608544	0.618953	0.626999	0.618595	0.616897	0.62195
1306.85	0.620543	0.605262	0.624085	0.59397	0.59925	0.61205	0.620802	0.598916	0.599415	0.63529	0.607061	0.613075	0.614522	0.610996	0.616453	0.599419	0.607342	0.608123	0.586459	0.619306	0.608874	0.612147	0.606626	0.611859	0.601832	0.629966	0.597763	0.610755	0.614721	0.60793	0.596317	0.613042	0.599566	0.604743	0.604221	0.614573	0.622666	0.614321	0.612597	0.617622
1306.17	0.616372	0.601047	0.619945	0.589788	0.595092	0.607893	0.616653	0.594716	0.595267	0.631164	0.602916	0.60895	0.610353	0.606858	0.612258	0.59523	0.603151	0.603973	0.582289	0.615119	0.604712	0.607989	0.602483	0.607679	0.597691	0.62581	0.593599	0.606611	0.610531	0.603695	0.592094	0.608876	0.595356	0.600531	0.600023	0.610318	0.618456	0.61017	0.60842	0.613419
1305.48	0.612325	0.596954	0.615925	0.585731	0.591053	0.60386	0.612623	0.590641	0.591238	0.627159	0.598895	0.60494	0.606303	0.602837	0.608186	0.591164	0.599082	0.599942	0.578243	0.611057	0.600672	0.603951	0.59846	0.603623	0.593672	0.621776	0.589553	0.602582	0.606459	0.599579	0.587992	0.604832	0.591268	0.596438	0.595944	0.606188	0.614373	0.606139	0.60436	0.60934
1304.8	0.608399	0.592981	0.61202	0.581794	0.587124	0.599938	0.608705	0.586683	0.587328	0.623268	0.594991	0.60104	0.602369	0.59893	0.60423	0.587211	0.595125	0.596024	0.574308	0.607115	0.596751	0.60003	0.594558	0.599688	0.589772	0.617862	0.585621	0.598662	0.602503	0.595579	0.584006	0.600901	0.587295	0.592463	0.591985	0.602181	0.610416	0.602225	0.600418	0.605382
1304.12	0.604595	0.589124	0.608231	0.577972	0.583306	0.596122	0.604898	0.582835	0.583532	0.619489	0.591198	0.597252	0.59855	0.595138	0.600388	0.583367	0.591281	0.592216	0.570482	0.60329	0.592945	0.596227	0.590774	0.595869	0.585993	0.614063	0.581802	0.594855	0.598663	0.591697	0.580134	0.59708	0.583433	0.588602	0.588142	0.598294	0.606582	0.598428	0.596594	0.60154
1303.44	0.600908	0.58538	0.604556	0.574262	0.579604	0.592421	0.601204	0.579097	0.579844	0.615821	0.587511	0.593578	0.594845	0.591458	0.596663	0.579632	0.587552	0.58852	0.56677	0.599582	0.589255	0.592533	0.587099	0.592162	0.582332	0.610376	0.578094	0.591165	0.594937	0.587933	0.576377	0.593369	0.579684	0.584857	0.584414	0.594522	0.602866	0.59474	0.592887	0.597808
1302.76	0.59733	0.581745	0.600989	0.570661	0.576017	0.588836	0.597624	0.575475	0.576261	0.612265	0.58393	0.590018	0.59125	0.587888	0.593052	0.576009	0.583938	0.584935	0.563168	0.595987	0.585679	0.588945	0.583528	0.588564	0.578783	0.606795	0.574495	0.587591	0.591322	0.584279	0.572734	0.58977	0.576047	0.581227	0.580796	0.590862	0.599262	0.591155	0.589289	0.594182
1302.08	0.59386	0.578219	0.597525	0.567165	0.572536	0.585358	0.594149	0.571965	0.572782	0.608819	0.580458	0.586569	0.587761	0.584422	0.589546	0.572497	0.580432	0.581457	0.559673	0.592502	0.582214	0.585462	0.580056	0.585077	0.575339	0.603318	0.571002	0.584122	0.587811	0.580731	0.569199	0.586278	0.572519	0.577707	0.577283	0.587311	0.595767	0.587673	0.585794	0.590665
1301.41	0.590493	0.574798	0.594161	0.563772	0.569155	0.581979	0.590776	0.568559	0.569409	0.605474	0.577096	0.583225	0.584377	0.58106	0.586143	0.569092	0.577027	0.578083	0.556282	0.589117	0.578852	0.582083	0.576688	0.581697	0.571997	0.599943	0.567612	0.580751	0.584405	0.57729	0.56577	0.582892	0.569098	0.574291	0.573872	0.583868	0.592374	0.584301	0.582397	0.587256
1300.73	0.587229	0.571482	0.590901	0.560483	0.565877	0.5787	0.587508	0.565256	0.566143	0.602227	0.573838	0.57998	0.581097	0.577804	0.582841	0.565792	0.573724	0.574814	0.552998	0.585827	0.575585	0.578811	0.573429	0.57842	0.568754	0.596673	0.564329	0.577479	0.581109	0.573959	0.562447	0.579613	0.565782	0.570976	0.570565	0.580529	0.589077	0.581039	0.579103	0.583956
1300.05	0.584062	0.568267	0.587748	0.557298	0.562706	0.575526	0.584347	0.562055	0.562981	0.599075	0.57068	0.576831	0.577919	0.574652	0.57964	0.562592	0.570521	0.571648	0.549818	0.582632	0.572412	0.575642	0.570275	0.57524	0.565606	0.593508	0.561152	0.574313	0.57792	0.570738	0.55923	0.576441	0.56257	0.56776	0.567363	0.57729	0.585873	0.577883	0.575919	0.580762
1299.38	0.580986	0.565154	0.584695	0.554211	0.559636	0.572453	0.581285	0.558951	0.55992	0.59602	0.567618	0.57378	0.574839	0.571595	0.576538	0.559485	0.567416	0.568576	0.546733	0.579535	0.569335	0.57257	0.567219	0.572156	0.56255	0.590441	0.558077	0.571252	0.574827	0.567615	0.556113	0.573366	0.559452	0.564641	0.564258	0.574145	0.582767	0.574819	0.57284	0.577667
1298.7	0.578004	0.562142	0.581735	0.551214	0.556659	0.569473	0.578313	0.555942	0.556949	0.593062	0.56465	0.570824	0.571853	0.568627	0.57353	0.556471	0.564407	0.565591	0.543739	0.576537	0.566356	0.569587	0.564254	0.569166	0.559589	0.587464	0.555094	0.568288	0.571821	0.564584	0.55309	0.57038	0.556423	0.561614	0.561242	0.571093	0.579764	0.57184	0.569857	0.574663
1298.03	0.575117	0.559224	0.57886	0.548307	0.553771	0.566581	0.575429	0.553026	0.554065	0.590197	0.561774	0.56796	0.568957	0.565747	0.570618	0.553556	0.561493	0.562696	0.540836	0.573635	0.563472	0.566693	0.561377	0.566271	0.556723	0.584573	0.552197	0.56541	0.568906	0.561644	0.550162	0.567481	0.553483	0.558681	0.558317	0.568135	0.576863	0.568947	0.56696	0.571744
1297.35	0.572322	0.556395	0.57607	0.545492	0.550973	0.56378	0.572638	0.550204	0.551271	0.587425	0.558987	0.565186	0.566152	0.562959	0.5678	0.550738	0.558677	0.559896	0.538027	0.570822	0.560677	0.563891	0.558592	0.563466	0.553951	0.581768	0.54939	0.562619	0.566087	0.558796	0.54733	0.564679	0.550641	0.555846	0.55549	0.56527	0.574051	0.566147	0.564151	0.568916
1296.68	0.569615	0.553654	0.573368	0.542771	0.548268	0.561072	0.569939	0.547471	0.548568	0.584742	0.556286	0.562499	0.563437	0.560265	0.565074	0.548014	0.555952	0.557193	0.535311	0.568092	0.557963	0.561183	0.555896	0.560745	0.551264	0.579055	0.546677	0.559919	0.563364	0.556039	0.544588	0.561972	0.547896	0.553108	0.552761	0.562498	0.571318	0.563442	0.561432	0.566185
1296.01	0.566988	0.551004	0.570756	0.54014	0.54565	0.558455	0.567328	0.544824	0.545954	0.582147	0.553668	0.559897	0.560809	0.557658	0.562435	0.545376	0.553313	0.554579	0.532684	0.565444	0.555329	0.558567	0.553288	0.558102	0.548655	0.576432	0.544057	0.557308	0.560729	0.553372	0.541931	0.559357	0.545242	0.550457	0.55012	0.559813	0.568662	0.560827	0.558803	0.563547
1295.34	0.564439	0.548441	0.568234	0.537595	0.543118	0.555924	0.564801	0.542261	0.54342	0.579634	0.551135	0.557377	0.558264	0.555132	0.559878	0.542819	0.550756	0.552048	0.530138	0.562882	0.552778	0.556032	0.550763	0.555536	0.546122	0.573895	0.541521	0.55478	0.558173	0.550793	0.539359	0.556824	0.542669	0.547886	0.547557	0.55721	0.566086	0.558296	0.55626	0.560993
1294.67	0.56197	0.545954	0.565793	0.535129	0.540662	0.55347	0.562355	0.539781	0.540963	0.577196	0.548683	0.554936	0.555798	0.552681	0.557399	0.540342	0.548274	0.54959	0.527669	0.560406	0.550314	0.553571	0.548316	0.553051	0.543667	0.57144	0.539058	0.552329	0.555691	0.548294	0.536867	0.554366	0.540175	0.545392	0.54507	0.554684	0.563594	0.555842	0.553794	0.558515
1294	0.55958	0.543537	0.563424	0.532735	0.538277	0.551088	0.559984	0.537377	0.538582	0.574831	0.546309	0.55257	0.55341	0.550308	0.554996	0.537939	0.545867	0.547206	0.525275	0.558014	0.547934	0.551184	0.545943	0.550651	0.541295	0.569065	0.536667	0.549952	0.553285	0.545867	0.53445	0.551977	0.537758	0.542975	0.54266	0.552238	0.561185	0.553467	0.551403	0.556112
1293.33	0.557268	0.541191	0.561128	0.530413	0.535961	0.548777	0.557681	0.535046	0.53628	0.572538	0.544011	0.550278	0.551098	0.548012	0.55267	0.535609	0.543536	0.544898	0.522955	0.555699	0.54563	0.548874	0.543643	0.548334	0.539006	0.566768	0.534352	0.547649	0.550956	0.543511	0.532101	0.549659	0.535418	0.540633	0.540327	0.549872	0.558859	0.55117	0.549088	0.553788
1292.66	0.555031	0.538922	0.558908	0.528165	0.533719	0.546541	0.555449	0.532787	0.534055	0.570321	0.541787	0.54806	0.548862	0.545792	0.550419	0.53335	0.541283	0.542665	0.520709	0.55346	0.543397	0.546643	0.541419	0.546096	0.536796	0.564545	0.532112	0.545422	0.548707	0.541231	0.529826	0.547416	0.533153	0.538365	0.53807	0.547586	0.556612	0.548947	0.546849	0.551539
1291.99	0.552869	0.536733	0.556762	0.525992	0.531556	0.544381	0.553292	0.530605	0.531905	0.56818	0.539638	0.545915	0.546697	0.543644	0.548241	0.531163	0.539108	0.540506	0.518535	0.551294	0.541237	0.544486	0.539272	0.54393	0.534661	0.562391	0.529945	0.54327	0.546532	0.539026	0.527626	0.54525	0.530959	0.536171	0.535885	0.545373	0.554441	0.546792	0.544685	0.549361
1291.32	0.550781	0.534617	0.554685	0.523892	0.529473	0.542292	0.551212	0.528499	0.529823	0.566112	0.537563	0.543844	0.544606	0.541568	0.546134	0.529049	0.537007	0.538417	0.516431	0.549202	0.539154	0.542399	0.537199	0.541837	0.532597	0.560304	0.527848	0.541191	0.544429	0.536893	0.525503	0.543157	0.528835	0.534049	0.533772	0.543232	0.552342	0.544704	0.54259	0.547253
1290.66	0.548767	0.532567	0.552674	0.521861	0.52746	0.540272	0.549205	0.526463	0.527811	0.564116	0.535561	0.541848	0.542587	0.539563	0.544098	0.527009	0.534977	0.536395	0.514398	0.547181	0.53715	0.540383	0.535194	0.539817	0.530604	0.558287	0.525821	0.539178	0.542393	0.534832	0.523455	0.541133	0.526778	0.531997	0.531731	0.541163	0.550315	0.542688	0.540563	0.545215
1289.99	0.546824	0.530585	0.550731	0.519899	0.525514	0.538321	0.547265	0.524494	0.525871	0.562192	0.533629	0.539922	0.540641	0.537628	0.542134	0.525043	0.533016	0.534445	0.512438	0.545227	0.535216	0.53844	0.533258	0.537868	0.528678	0.556344	0.523863	0.537235	0.540427	0.532843	0.521475	0.539178	0.524793	0.530015	0.52976	0.539167	0.548357	0.54075	0.538603	0.543249
1289.32	0.544951	0.528677	0.548861	0.51801	0.523632	0.536442	0.545391	0.522592	0.524003	0.560341	0.531766	0.538064	0.538766	0.535762	0.540243	0.52315	0.531123	0.532567	0.510552	0.543335	0.533345	0.536568	0.53139	0.535985	0.526817	0.554475	0.521974	0.53536	0.538529	0.530925	0.519565	0.537297	0.522882	0.528106	0.527856	0.537243	0.546468	0.538884	0.536714	0.541355
1288.66	0.543148	0.526844	0.547065	0.516194	0.52182	0.534633	0.543585	0.52076	0.522204	0.558559	0.529968	0.536273	0.536958	0.533964	0.53842	0.521325	0.529298	0.53076	0.508737	0.541505	0.531536	0.534764	0.529593	0.534166	0.525021	0.552673	0.520157	0.533554	0.536701	0.529078	0.517723	0.535487	0.521043	0.526269	0.52602	0.535391	0.544643	0.537081	0.534898	0.539528
1288	0.54141	0.52508	0.545341	0.51445	0.520081	0.532892	0.541851	0.519001	0.520467	0.55684	0.528233	0.534547	0.535213	0.532233	0.536664	0.519565	0.527541	0.529018	0.506989	0.539738	0.529792	0.533026	0.527865	0.532413	0.523291	0.550934	0.518411	0.531814	0.534942	0.5273	0.515954	0.533746	0.519271	0.524502	0.524254	0.533606	0.542883	0.535339	0.533154	0.537768
1287.33	0.539732	0.52338	0.54368	0.512774	0.518412	0.531217	0.540188	0.517312	0.518793	0.555184	0.526565	0.532889	0.533535	0.530571	0.534974	0.517871	0.52585	0.527341	0.505303	0.538038	0.528115	0.531353	0.526203	0.530727	0.521625	0.549258	0.516734	0.53014	0.533255	0.525592	0.514256	0.53207	0.517568	0.522802	0.522556	0.53188	0.541186	0.533663	0.531477	0.536075
1286.67	0.538111	0.521745	0.542079	0.511156	0.51681	0.529608	0.538589	0.515688	0.517188	0.553594	0.524964	0.531298	0.531926	0.528976	0.533349	0.516246	0.524226	0.525729	0.503682	0.536405	0.526503	0.529747	0.524606	0.529103	0.520022	0.547648	0.515121	0.528535	0.531636	0.52395	0.512625	0.530458	0.515931	0.521164	0.520926	0.530213	0.539551	0.532058	0.529867	0.534448
1286.01	0.536551	0.520178	0.540539	0.509597	0.515266	0.528064	0.537049	0.514126	0.515651	0.552072	0.523431	0.529773	0.530383	0.527446	0.53179	0.514687	0.522666	0.524186	0.502127	0.534839	0.524953	0.528206	0.523073	0.527541	0.518479	0.546102	0.513572	0.526997	0.530079	0.522371	0.511055	0.52891	0.51436	0.519588	0.519358	0.528609	0.53798	0.53052	0.528321	0.532885
1285.35	0.535057	0.518675	0.53906	0.5081	0.513781	0.526583	0.535568	0.512625	0.514176	0.550613	0.521959	0.528308	0.528902	0.525975	0.530291	0.513188	0.521168	0.522709	0.500635	0.533339	0.523461	0.52673	0.521602	0.52604	0.516997	0.54462	0.512083	0.525522	0.528579	0.520852	0.509545	0.527423	0.51285	0.518073	0.517853	0.527073	0.53647	0.529044	0.526836	0.531384
1284.69	0.533627	0.51723	0.537645	0.506666	0.512354	0.525158	0.534146	0.511183	0.512757	0.549207	0.520544	0.5269	0.527475	0.524559	0.52885	0.511742	0.519726	0.521287	0.499197	0.531902	0.522026	0.525314	0.520188	0.524602	0.515575	0.543199	0.510654	0.524104	0.527136	0.519391	0.508093	0.525994	0.511395	0.516619	0.51641	0.525602	0.53502	0.527625	0.525409	0.529943
1284.03	0.532253	0.515835	0.53629	0.505293	0.510985	0.523787	0.532782	0.509798	0.511391	0.547853	0.519184	0.525545	0.526102	0.523199	0.527465	0.510348	0.518338	0.519913	0.497811	0.530525	0.520647	0.523954	0.518827	0.523222	0.514208	0.54184	0.509282	0.522741	0.525753	0.517988	0.506697	0.524619	0.509995	0.515224	0.515022	0.524189	0.53363	0.526263	0.52404	0.528563
1283.37	0.530929	0.514494	0.534992	0.503974	0.509671	0.522469	0.531474	0.508467	0.510082	0.546557	0.517881	0.524245	0.524785	0.521894	0.526136	0.509013	0.517004	0.518592	0.496478	0.529207	0.519329	0.522647	0.51752	0.521897	0.512898	0.54054	0.507966	0.521435	0.524431	0.516642	0.505359	0.523299	0.508651	0.513884	0.513687	0.52283	0.5323	0.524956	0.522727	0.527242
1282.71	0.52966	0.513211	0.533747	0.502704	0.508411	0.521207	0.53022	0.507193	0.50883	0.545322	0.516636	0.523001	0.523528	0.520644	0.524866	0.507742	0.51573	0.517332	0.495207	0.527948	0.518076	0.521396	0.516272	0.520629	0.511649	0.539296	0.506704	0.520185	0.523165	0.515352	0.504079	0.522038	0.507366	0.512598	0.512404	0.521528	0.531033	0.523704	0.521472	0.525977
1282.05	0.528455	0.511986	0.532554	0.501486	0.507205	0.520002	0.52902	0.505975	0.507633	0.544144	0.515447	0.521813	0.522328	0.519446	0.523651	0.506531	0.514517	0.516132	0.493996	0.526746	0.516887	0.520197	0.51508	0.519421	0.510466	0.538103	0.505495	0.518988	0.521949	0.514117	0.502856	0.520835	0.506137	0.511368	0.511179	0.520286	0.529829	0.522507	0.520271	0.524764
1281.39	0.527318	0.510815	0.531408	0.500321	0.506054	0.518851	0.527875	0.504811	0.506488	0.543019	0.51431	0.520679	0.52118	0.518302	0.522491	0.505371	0.513359	0.514985	0.492841	0.5256	0.515758	0.519052	0.513941	0.518277	0.509348	0.53696	0.50434	0.517841	0.520783	0.512937	0.501685	0.519686	0.504959	0.510194	0.510012	0.519108	0.528685	0.521364	0.51912	0.5236
1280.74	0.52624	0.509698	0.530317	0.499217	0.504962	0.517755	0.526784	0.5037	0.505395	0.541942	0.513227	0.519599	0.520085	0.517214	0.521386	0.504258	0.512255	0.513887	0.491737	0.524505	0.514683	0.51796	0.512854	0.517192	0.508288	0.535869	0.503241	0.516748	0.519674	0.511816	0.500567	0.518588	0.503834	0.509075	0.508903	0.517991	0.527597	0.520275	0.518021	0.52249
1280.08	0.525214	0.50864	0.529286	0.498177	0.50393	0.516717	0.525751	0.502646	0.504356	0.540919	0.512198	0.518574	0.519047	0.516181	0.520338	0.503196	0.511205	0.512843	0.490687	0.523462	0.51366	0.516925	0.511824	0.516161	0.507279	0.534835	0.502201	0.515715	0.518628	0.510756	0.499505	0.517543	0.502767	0.50801	0.507846	0.516929	0.526558	0.519241	0.516981	0.521441
1279.43	0.524234	0.50764	0.528315	0.497196	0.502954	0.515734	0.524776	0.501652	0.503375	0.539952	0.511227	0.517603	0.518065	0.515205	0.519346	0.502191	0.510211	0.511855	0.489693	0.522473	0.512688	0.515946	0.51085	0.51518	0.506317	0.53386	0.501217	0.514741	0.51764	0.509751	0.498502	0.516553	0.501759	0.506999	0.506841	0.515913	0.525566	0.518258	0.516	0.520455
1278.77	0.523305	0.506691	0.527396	0.496262	0.502023	0.514799	0.523851	0.500712	0.502452	0.539041	0.510312	0.516687	0.517139	0.514282	0.518404	0.501244	0.509272	0.510922	0.488756	0.521539	0.511769	0.51502	0.509928	0.514249	0.505404	0.532937	0.500283	0.51382	0.516701	0.508795	0.497553	0.515618	0.500804	0.506044	0.505887	0.514947	0.524626	0.517327	0.515071	0.519521
1278.12	0.522434	0.505789	0.526521	0.49537	0.501135	0.513913	0.522973	0.49982	0.501582	0.538185	0.509449	0.515824	0.516265	0.513412	0.517512	0.500351	0.508387	0.51004	0.487869	0.520656	0.510905	0.514147	0.509055	0.513372	0.504545	0.532062	0.499395	0.512943	0.515806	0.507888	0.496653	0.514734	0.499899	0.505144	0.504989	0.514038	0.523741	0.516448	0.51419	0.518631
1277.47	0.521621	0.504942	0.525697	0.494529	0.500303	0.513083	0.522147	0.498981	0.500763	0.537382	0.508638	0.515015	0.515444	0.512594	0.516676	0.499512	0.507555	0.509211	0.487034	0.519819	0.510091	0.513328	0.508237	0.51255	0.50374	0.531238	0.498558	0.512115	0.514964	0.507037	0.495805	0.513901	0.499046	0.504302	0.504149	0.513191	0.522913	0.515626	0.513359	0.51779
1276.81	0.520861	0.50416	0.524935	0.493752	0.499537	0.51232	0.521383	0.498201	0.499994	0.536633	0.507879	0.514258	0.514676	0.511828	0.515899	0.498729	0.506777	0.508439	0.486254	0.519027	0.50932	0.512565	0.507476	0.511777	0.502986	0.530468	0.497781	0.511346	0.514185	0.506248	0.495018	0.513125	0.498251	0.503514	0.503365	0.512401	0.522138	0.514862	0.51259	0.517008
1276.16	0.520146	0.503441	0.524233	0.493038	0.498832	0.511619	0.520677	0.497482	0.499274	0.535937	0.507174	0.513551	0.513962	0.51111	0.515175	0.497999	0.506051	0.507723	0.485529	0.518282	0.508592	0.511855	0.50677	0.511048	0.502274	0.529752	0.497066	0.510639	0.513467	0.505515	0.494292	0.51241	0.497513	0.502777	0.502633	0.511658	0.521407	0.514153	0.511882	0.51629
1275.51	0.519473	0.50277	0.523578	0.492371	0.498172	0.510961	0.520018	0.496812	0.498605	0.535291	0.506519	0.512892	0.513296	0.510441	0.514497	0.497316	0.505373	0.507054	0.484851	0.517589	0.50791	0.511192	0.506111	0.510363	0.501602	0.529086	0.496403	0.509986	0.512797	0.504825	0.493615	0.511747	0.496823	0.502085	0.501947	0.510958	0.52072	0.513489	0.511223	0.515625
1274.86	0.518846	0.502136	0.52296	0.49174	0.497544	0.510334	0.519396	0.496182	0.497984	0.53469	0.505909	0.512281	0.512675	0.509818	0.513862	0.49667	0.504735	0.506422	0.484213	0.516951	0.507282	0.51057	0.505496	0.509726	0.500977	0.528466	0.495781	0.509374	0.512165	0.504174	0.492974	0.511126	0.496174	0.501437	0.501306	0.510301	0.52008	0.51287	0.510601	0.514997
1274.21	0.518265	0.501539	0.522382	0.491149	0.496955	0.509742	0.518811	0.495587	0.497408	0.534132	0.505343	0.511716	0.512097	0.509244	0.513271	0.496062	0.504137	0.505825	0.483611	0.516365	0.506708	0.509994	0.504925	0.509141	0.500404	0.527892	0.4952	0.508796	0.511573	0.503566	0.492369	0.510538	0.495565	0.500839	0.500713	0.509693	0.519491	0.512297	0.510017	0.514403
1273.56	0.51773	0.500992	0.521854	0.490606	0.496419	0.509201	0.518274	0.495035	0.496877	0.533618	0.504823	0.511199	0.511566	0.508719	0.512727	0.495501	0.503581	0.505275	0.483055	0.515828	0.50618	0.509468	0.504403	0.508608	0.49988	0.52737	0.494664	0.50826	0.511028	0.503011	0.491812	0.509991	0.495003	0.50029	0.500167	0.509134	0.518954	0.511774	0.509482	0.513855
1272.91	0.517239	0.5005	0.521381	0.490119	0.495943	0.50872	0.517794	0.494537	0.496394	0.53315	0.504352	0.510731	0.511083	0.508242	0.51223	0.494995	0.503075	0.50478	0.482554	0.515332	0.505692	0.508994	0.503931	0.508119	0.499396	0.526901	0.49418	0.507777	0.510539	0.502511	0.491315	0.509494	0.494491	0.499787	0.499666	0.508621	0.518459	0.511299	0.509007	0.513364
1272.26	0.51679	0.500058	0.520956	0.489681	0.495518	0.508293	0.517367	0.494097	0.495955	0.532728	0.503927	0.510308	0.510647	0.50781	0.511779	0.494543	0.502622	0.50434	0.482107	0.514881	0.505247	0.508563	0.503504	0.507671	0.49895	0.526478	0.493743	0.507347	0.510101	0.502061	0.490875	0.509057	0.494029	0.499327	0.499211	0.50815	0.518003	0.510866	0.508585	0.51293
1271.62	0.516384	0.499656	0.520569	0.489281	0.495128	0.507903	0.516983	0.493704	0.495559	0.532346	0.503543	0.509926	0.510254	0.507417	0.511373	0.494139	0.50222	0.503945	0.481707	0.514476	0.504852	0.508169	0.503115	0.507266	0.498551	0.52609	0.493348	0.506962	0.509704	0.501649	0.490475	0.508668	0.493612	0.498912	0.498803	0.507724	0.517594	0.510471	0.508201	0.512538
1270.97	0.516027	0.499289	0.52022	0.48892	0.494768	0.507541	0.516631	0.493346	0.495205	0.532001	0.503199	0.509582	0.509905	0.507062	0.511013	0.493771	0.501858	0.503585	0.481341	0.514115	0.50451	0.507814	0.502763	0.506908	0.498209	0.525736	0.492992	0.506612	0.509345	0.501275	0.490105	0.508316	0.493238	0.498544	0.498439	0.507347	0.517238	0.510115	0.507848	0.51218
1270.33	0.51572	0.498962	0.519911	0.488604	0.494446	0.507215	0.516311	0.493018	0.494894	0.531698	0.502897	0.509279	0.509599	0.506747	0.510696	0.493438	0.50153	0.50326	0.481008	0.513796	0.504214	0.507501	0.502452	0.506597	0.497922	0.525421	0.492678	0.506298	0.509027	0.500943	0.489773	0.507996	0.492903	0.498219	0.498115	0.507019	0.516933	0.509806	0.50753	0.511855
1269.68	0.515459	0.49868	0.519648	0.488338	0.494178	0.506942	0.516036	0.49273	0.494626	0.531442	0.50264	0.509021	0.509336	0.506478	0.510416	0.493145	0.501239	0.502975	0.480716	0.513517	0.503951	0.507234	0.502185	0.50633	0.497672	0.525151	0.492409	0.506029	0.508757	0.500662	0.489492	0.507718	0.492608	0.497932	0.497828	0.506734	0.516665	0.509543	0.507259	0.511575
1269.04	0.515237	0.498445	0.51943	0.488119	0.493961	0.506727	0.515815	0.492494	0.4944	0.531234	0.502425	0.508808	0.509115	0.506255	0.510176	0.492899	0.500994	0.502738	0.480475	0.513276	0.503719	0.507013	0.501962	0.506099	0.497445	0.524927	0.492184	0.505811	0.508534	0.500426	0.489267	0.50749	0.492355	0.497682	0.497583	0.506489	0.516421	0.509321	0.507036	0.511346
1268.39	0.515046	0.498257	0.519255	0.487933	0.493783	0.506552	0.515642	0.492306	0.494215	0.531067	0.502251	0.508635	0.508933	0.506074	0.509977	0.4927	0.500799	0.502548	0.480281	0.513072	0.503525	0.506833	0.501778	0.505902	0.497245	0.524743	0.492001	0.50564	0.50835	0.500229	0.489083	0.507304	0.492146	0.497472	0.497382	0.506282	0.516209	0.509136	0.506854	0.511165
1267.75	0.514888	0.498105	0.519118	0.487774	0.493632	0.506402	0.515503	0.492154	0.494069	0.530936	0.502114	0.508496	0.508788	0.505933	0.50982	0.492544	0.500646	0.502398	0.480127	0.512905	0.503377	0.506688	0.501632	0.505742	0.497087	0.524595	0.491853	0.505503	0.5082	0.500066	0.488927	0.507149	0.491979	0.497309	0.497224	0.506113	0.516044	0.508985	0.506705	0.511022
1267.11	0.514765	0.497984	0.519016	0.487649	0.493511	0.506275	0.515387	0.492032	0.49396	0.530841	0.502015	0.508392	0.508682	0.505828	0.509704	0.492422	0.500527	0.50228	0.480004	0.51278	0.503274	0.506581	0.501526	0.505625	0.49698	0.524484	0.491739	0.505394	0.508087	0.49994	0.488799	0.507023	0.49185	0.497189	0.497104	0.505982	0.515936	0.508874	0.506588	0.510909
1266.46	0.514682	0.497898	0.518946	0.487568	0.493432	0.506191	0.515302	0.491943	0.493886	0.530786	0.501955	0.508326	0.508616	0.505757	0.509622	0.492332	0.500439	0.502192	0.479916	0.512699	0.503205	0.506515	0.501459	0.50555	0.496914	0.524416	0.491663	0.505316	0.508011	0.499855	0.488708	0.506937	0.491758	0.497104	0.497019	0.505889	0.51587	0.508805	0.506511	0.510827
1265.82	0.514638	0.497851	0.518909	0.487533	0.493403	0.506158	0.515261	0.491898	0.493847	0.53077	0.501934	0.508299	0.508587	0.505721	0.509575	0.492279	0.500388	0.502145	0.479869	0.512654	0.503159	0.506489	0.501429	0.505508	0.496873	0.524391	0.491626	0.505277	0.507973	0.499808	0.488664	0.506902	0.491701	0.497047	0.496967	0.505834	0.515827	0.508773	0.506476	0.510781
1265.18	0.51463	0.497844	0.518907	0.487536	0.493414	0.506167	0.515267	0.491897	0.493841	0.530787	0.501946	0.508307	0.508591	0.50572	0.509563	0.492263	0.500376	0.502138	0.479861	0.512639	0.50314	0.506496	0.501432	0.505494	0.496853	0.524402	0.491628	0.505281	0.507971	0.499795	0.488663	0.506912	0.491683	0.497023	0.49695	0.505816	0.515799	0.508775	0.506482	0.510775
1264.54	0.514652	0.497869	0.518941	0.487564	0.493449	0.506199	0.515305	0.49193	0.493864	0.53083	0.501988	0.508346	0.508624	0.505753	0.509587	0.492279	0.500397	0.502165	0.479882	0.512653	0.503158	0.506528	0.501467	0.505506	0.496862	0.52444	0.49166	0.505321	0.508001	0.499812	0.48869	0.506949	0.491701	0.497035	0.496967	0.505827	0.515798	0.508805	0.506521	0.510803
1263.9	0.514703	0.497918	0.519008	0.487614	0.493499	0.506246	0.515362	0.491982	0.493917	0.530901	0.502059	0.508414	0.508684	0.505814	0.50964	0.492319	0.500443	0.502213	0.479924	0.512702	0.503218	0.506587	0.501532	0.50555	0.49691	0.524504	0.491717	0.505388	0.508058	0.499857	0.488735	0.507002	0.491749	0.497083	0.497014	0.505865	0.515839	0.508867	0.506586	0.51086
1263.26	0.514786	0.497995	0.519103	0.487692	0.493573	0.506318	0.515437	0.492051	0.494006	0.531006	0.502161	0.508514	0.508776	0.505905	0.50972	0.492383	0.500513	0.502282	0.479991	0.512789	0.503317	0.506678	0.501628	0.505632	0.496999	0.524599	0.491798	0.505479	0.508144	0.499932	0.488807	0.507078	0.491817	0.497158	0.497088	0.505937	0.515924	0.508961	0.506681	0.510944
1262.63	0.514905	0.498109	0.519228	0.487808	0.493686	0.506433	0.515547	0.492154	0.494131	0.531146	0.502297	0.508648	0.508903	0.506026	0.50983	0.492484	0.500617	0.502386	0.480097	0.512908	0.503444	0.506802	0.501756	0.505753	0.497125	0.524729	0.491914	0.505598	0.50826	0.500042	0.48892	0.50719	0.491909	0.497257	0.49719	0.50605	0.516044	0.509089	0.506807	0.511059
1261.99	0.51506	0.49826	0.519384	0.487963	0.493843	0.506594	0.515704	0.492304	0.49429	0.531318	0.502466	0.508813	0.509063	0.50618	0.509975	0.49263	0.500766	0.502535	0.480245	0.513056	0.503595	0.506959	0.501913	0.505912	0.497279	0.524892	0.492067	0.505748	0.508411	0.500189	0.489078	0.507348	0.492036	0.497389	0.497329	0.506202	0.516189	0.509249	0.506964	0.511209
1261.35	0.515244	0.498441	0.519575	0.48815	0.494035	0.506786	0.5159	0.492495	0.494478	0.531518	0.502663	0.509008	0.509255	0.506369	0.51016	0.492815	0.500955	0.502726	0.480428	0.513234	0.503771	0.507148	0.502098	0.506099	0.497457	0.525085	0.492255	0.505933	0.508595	0.500372	0.48927	0.507544	0.492207	0.497563	0.497507	0.506379	0.516358	0.509438	0.507151	0.511393
1260.72	0.515452	0.498646	0.519802	0.488366	0.494253	0.507	0.516123	0.492714	0.494693	0.531748	0.502887	0.509232	0.509476	0.506588	0.510377	0.493028	0.501173	0.502945	0.480636	0.513439	0.503977	0.507367	0.502311	0.506306	0.497662	0.525306	0.492473	0.506151	0.508813	0.500589	0.489486	0.507767	0.49242	0.497779	0.497723	0.506576	0.516557	0.509657	0.507368	0.51161
1260.08	0.515686	0.498883	0.520059	0.488611	0.494498	0.50724	0.516369	0.492954	0.494937	0.532008	0.50314	0.509485	0.509728	0.506832	0.510623	0.493264	0.501413	0.503183	0.480866	0.513669	0.504212	0.507617	0.502558	0.506535	0.497896	0.525556	0.492721	0.506404	0.509062	0.500834	0.489727	0.508011	0.492661	0.498025	0.49797	0.506802	0.516788	0.509909	0.50762	0.511861
1259.45	0.515955	0.499157	0.52034	0.488884	0.494773	0.507515	0.516644	0.49322	0.495206	0.532293	0.503423	0.509764	0.510005	0.507101	0.510894	0.493525	0.501675	0.503442	0.481123	0.513924	0.504476	0.507895	0.502837	0.506794	0.49816	0.525835	0.492998	0.506688	0.509342	0.501106	0.489997	0.508282	0.492922	0.498291	0.498241	0.507064	0.517046	0.51019	0.507905	0.512143
1258.81	0.516256	0.499461	0.520643	0.489181	0.495075	0.507824	0.516949	0.493518	0.495498	0.5326	0.50373	0.510065	0.510306	0.507395	0.51119	0.493811	0.501963	0.503727	0.481409	0.514207	0.504768	0.508194	0.50314	0.507085	0.498449	0.526137	0.493301	0.506997	0.509648	0.501401	0.490295	0.508583	0.493204	0.498575	0.498531	0.507359	0.51733	0.510494	0.508214	0.512449
1258.18	0.51658	0.499784	0.520968	0.489497	0.495397	0.508152	0.517278	0.493845	0.49581	0.532927	0.504057	0.510386	0.510627	0.507714	0.511513	0.49412	0.502276	0.504039	0.48172	0.51452	0.505088	0.508512	0.50346	0.507404	0.49876	0.52646	0.493626	0.507324	0.509977	0.501719	0.490615	0.50891	0.493512	0.498882	0.498842	0.507676	0.51764	0.510817	0.508543	0.512775
1257.55	0.51692	0.500124	0.521318	0.489835	0.495736	0.508492	0.517624	0.494191	0.496145	0.533279	0.504403	0.510731	0.51097	0.50806	0.51186	0.494452	0.502611	0.504378	0.482053	0.514858	0.505434	0.508852	0.503799	0.507746	0.499092	0.526805	0.493972	0.50767	0.510327	0.502061	0.490956	0.509256	0.493845	0.499218	0.499178	0.508011	0.517977	0.511162	0.508889	0.513121
1256.91	0.51728	0.500489	0.52169	0.490199	0.496098	0.50885	0.517986	0.494555	0.496507	0.533656	0.504773	0.5111	0.511337	0.508428	0.512229	0.494805	0.502969	0.504739	0.482406	0.515215	0.505801	0.509218	0.504162	0.508109	0.499451	0.527173	0.494338	0.508038	0.510698	0.502428	0.491319	0.509621	0.494202	0.499581	0.499542	0.508369	0.518344	0.51153	0.509258	0.513492
1256.28	0.517668	0.500883	0.522082	0.49059	0.496489	0.509235	0.518371	0.494938	0.496895	0.534053	0.505169	0.511493	0.511729	0.508817	0.512618	0.49518	0.503351	0.50512	0.482784	0.51559	0.506187	0.509609	0.504551	0.508494	0.499838	0.527565	0.494727	0.50843	0.511089	0.502818	0.491707	0.510007	0.494579	0.499963	0.49993	0.508755	0.518736	0.511921	0.509651	0.513887
1255.65	0.518083	0.501301	0.522491	0.491002	0.496906	0.509648	0.518783	0.495346	0.497305	0.534471	0.50559	0.51191	0.512146	0.509227	0.513024	0.495576	0.503757	0.505519	0.483185	0.515987	0.50659	0.510026	0.504963	0.508897	0.500246	0.527984	0.495138	0.508842	0.5115	0.503229	0.49212	0.510417	0.494975	0.50036	0.500337	0.509168	0.519144	0.512339	0.510066	0.514302
1255.02	0.518521	0.501734	0.522919	0.491427	0.497339	0.51008	0.519217	0.495775	0.497736	0.534912	0.506032	0.512346	0.512584	0.509662	0.513447	0.495992	0.504181	0.505939	0.483605	0.516407	0.507009	0.510465	0.505396	0.509319	0.500666	0.528428	0.495569	0.509273	0.511927	0.503656	0.492554	0.510848	0.495392	0.500776	0.500758	0.5096	0.519561	0.512781	0.510502	0.514736
1254.39	0.518975	0.502178	0.523366	0.491865	0.497781	0.510522	0.519664	0.496222	0.498185	0.535374	0.50649	0.512801	0.513041	0.510117	0.513885	0.496428	0.504621	0.506378	0.48404	0.51685	0.507443	0.510922	0.505846	0.50976	0.501099	0.528891	0.496019	0.509723	0.512372	0.504098	0.493003	0.511295	0.495831	0.501213	0.501194	0.51005	0.519993	0.513243	0.510957	0.515186
1253.76	0.519446	0.502639	0.523832	0.492321	0.498237	0.510977	0.520122	0.496682	0.498648	0.535855	0.506965	0.513272	0.513514	0.510588	0.514343	0.496886	0.505082	0.506837	0.484493	0.517311	0.507896	0.511395	0.506311	0.510223	0.501552	0.529368	0.496487	0.510193	0.512837	0.504556	0.493466	0.511755	0.496288	0.50167	0.501647	0.510516	0.520441	0.513719	0.511432	0.515654
1253.13	0.519932	0.503121	0.524315	0.492797	0.498714	0.511454	0.520597	0.497158	0.499127	0.536348	0.507456	0.513759	0.514004	0.511072	0.514822	0.497366	0.505568	0.507318	0.48497	0.517788	0.50837	0.511883	0.506795	0.510707	0.502031	0.529858	0.496975	0.510684	0.513328	0.505038	0.493948	0.512232	0.496761	0.502143	0.502121	0.511	0.520911	0.514207	0.511925	0.516141
1252.51	0.520434	0.503624	0.524817	0.493296	0.499217	0.511957	0.521098	0.497657	0.499624	0.536856	0.507967	0.514263	0.514512	0.511576	0.515325	0.497866	0.506077	0.507822	0.485475	0.518285	0.508869	0.512387	0.5073	0.511208	0.502534	0.530364	0.497483	0.511191	0.51384	0.505547	0.494454	0.51273	0.497252	0.502638	0.502619	0.511501	0.521403	0.51471	0.512437	0.516647
1251.88	0.520953	0.504141	0.525339	0.493815	0.499741	0.512479	0.521625	0.498177	0.500144	0.537384	0.508495	0.514784	0.515042	0.512105	0.515851	0.498385	0.506602	0.508346	0.485998	0.518805	0.509394	0.512909	0.507823	0.511728	0.503058	0.530887	0.498008	0.51171	0.514369	0.506079	0.494982	0.513251	0.497765	0.503157	0.503138	0.512021	0.521921	0.515228	0.512966	0.517173
1251.25	0.521493	0.504669	0.525878	0.494352	0.500281	0.513014	0.522166	0.498714	0.500683	0.537934	0.50904	0.515325	0.51559	0.512653	0.516397	0.49892	0.507142	0.508891	0.486534	0.519344	0.509942	0.51345	0.508359	0.512269	0.503601	0.531427	0.498546	0.512241	0.51491	0.506628	0.495528	0.513792	0.498297	0.5037	0.503678	0.512562	0.522466	0.515759	0.513511	0.517717
1250.63	0.522052	0.505212	0.52643	0.494907	0.500835	0.513562	0.522716	0.499267	0.501239	0.538505	0.509602	0.515883	0.516153	0.513208	0.516961	0.499472	0.5077	0.509451	0.487081	0.519897	0.510508	0.514009	0.508908	0.512829	0.504161	0.531981	0.499098	0.51279	0.515464	0.507187	0.496087	0.514352	0.498847	0.50426	0.504233	0.513124	0.523029	0.516304	0.514071	0.518276
1250	0.522627	0.505777	0.526994	0.495477	0.501404	0.514127	0.52328	0.499837	0.501808	0.539086	0.51018	0.516454	0.516729	0.51377	0.517541	0.500042	0.508278	0.510021	0.487641	0.520459	0.511082	0.514584	0.509474	0.513402	0.504733	0.53255	0.499665	0.513359	0.516035	0.507757	0.496659	0.51493	0.499414	0.50483	0.504804	0.513703	0.523601	0.51687	0.514644	0.518849
1249.38	0.523217	0.50636	0.527571	0.496056	0.501985	0.514713	0.523863	0.500422	0.502391	0.539676	0.510775	0.517037	0.517319	0.514344	0.518134	0.500626	0.508871	0.5106	0.488218	0.52103	0.511661	0.515173	0.510057	0.513985	0.505311	0.533135	0.500246	0.513944	0.516621	0.508338	0.497246	0.515522	0.499996	0.505409	0.505386	0.514293	0.52418	0.517456	0.515231	0.519434
1248.75	0.52382	0.506953	0.528163	0.496643	0.502577	0.515312	0.524462	0.501018	0.502987	0.54028	0.511383	0.517631	0.517922	0.514938	0.518737	0.501222	0.509472	0.511191	0.48881	0.521614	0.512249	0.515774	0.510653	0.514579	0.505899	0.533736	0.500842	0.514539	0.517219	0.508935	0.497845	0.516124	0.500589	0.505997	0.505978	0.514893	0.52477	0.518058	0.51583	0.520031
1248.13	0.524433	0.507553	0.528766	0.497241	0.503178	0.515917	0.525069	0.501621	0.503596	0.5409	0.512001	0.518239	0.518539	0.515554	0.51935	0.501827	0.51008	0.511798	0.489416	0.522214	0.512854	0.516382	0.511258	0.515186	0.506502	0.534351	0.501451	0.515142	0.517826	0.509547	0.498456	0.516732	0.50119	0.506598	0.50658	0.515505	0.525379	0.51867	0.51644	0.520636
1247.5	0.525053	0.508163	0.529379	0.497852	0.503791	0.516526	0.52568	0.502233	0.504217	0.541535	0.512629	0.518861	0.519167	0.516185	0.519971	0.502441	0.510699	0.51242	0.49003	0.52283	0.51348	0.517	0.511872	0.515808	0.507123	0.53498	0.502071	0.515757	0.518442	0.510172	0.499075	0.517349	0.501801	0.507212	0.507194	0.516129	0.526005	0.51929	0.51706	0.521251
1246.88	0.525681	0.508789	0.530003	0.498478	0.504415	0.517146	0.5263	0.502862	0.504851	0.542177	0.513268	0.519497	0.519809	0.516824	0.520602	0.503066	0.511332	0.513051	0.490652	0.523458	0.51412	0.517631	0.512497	0.516441	0.507756	0.535619	0.5027	0.516385	0.519073	0.510808	0.499707	0.517978	0.502427	0.507838	0.507823	0.516763	0.526638	0.519922	0.51769	0.521878
1246.26	0.52632	0.509428	0.530641	0.499113	0.505051	0.517782	0.526937	0.503506	0.505497	0.542825	0.513919	0.520145	0.520462	0.51747	0.521248	0.50371	0.511979	0.513691	0.491287	0.524094	0.514767	0.518278	0.513134	0.517083	0.508398	0.536264	0.503337	0.517027	0.519719	0.511456	0.500353	0.518622	0.503068	0.508478	0.508464	0.517408	0.527274	0.520565	0.518329	0.522518
1245.64	0.526975	0.51008	0.53129	0.499761	0.505698	0.518432	0.527591	0.504163	0.506153	0.543484	0.514583	0.520803	0.521126	0.518126	0.521908	0.504371	0.512637	0.514343	0.491937	0.524736	0.515416	0.51894	0.513784	0.517734	0.509047	0.536916	0.503984	0.517677	0.52038	0.512116	0.501014	0.519278	0.503723	0.509133	0.509114	0.518066	0.527918	0.521218	0.518981	0.523174
1245.02	0.527643	0.510746	0.531945	0.50042	0.506358	0.519092	0.528254	0.504828	0.506818	0.544158	0.515258	0.521471	0.5218	0.518796	0.522579	0.505039	0.513306	0.515008	0.4926	0.525383	0.51607	0.519613	0.514449	0.518394	0.509705	0.53758	0.504644	0.518338	0.521049	0.512785	0.501684	0.519942	0.504384	0.509799	0.509774	0.518738	0.528572	0.521883	0.519648	0.523842
1244.4	0.528323	0.511423	0.532607	0.501089	0.507027	0.519756	0.52892	0.505496	0.507492	0.544844	0.515938	0.522147	0.522482	0.519474	0.523255	0.505708	0.513981	0.515676	0.493267	0.526037	0.516728	0.520296	0.515124	0.519061	0.510369	0.538256	0.505315	0.519007	0.521723	0.51346	0.502359	0.520608	0.505049	0.51047	0.510443	0.519421	0.529233	0.522559	0.520329	0.524519
1243.78	0.529009	0.512104	0.533278	0.501765	0.507705	0.520428	0.529591	0.506168	0.508169	0.545534	0.516621	0.522826	0.523168	0.520156	0.523934	0.506379	0.514662	0.516346	0.493938	0.526702	0.517391	0.520985	0.515803	0.519734	0.511038	0.53894	0.505992	0.519685	0.522402	0.514141	0.503039	0.521278	0.505715	0.511143	0.511117	0.520107	0.529899	0.523242	0.521018	0.525203
1243.16	0.529699	0.512784	0.53396	0.502446	0.508388	0.52111	0.530274	0.50685	0.508849	0.546223	0.517309	0.523505	0.523854	0.520839	0.524618	0.507059	0.515349	0.51702	0.494617	0.527378	0.518062	0.521672	0.516482	0.520416	0.511717	0.539624	0.506673	0.520371	0.523087	0.51483	0.503727	0.521957	0.506385	0.511816	0.511792	0.520794	0.530574	0.523927	0.521709	0.525891
1242.54	0.53039	0.513467	0.53465	0.503133	0.509076	0.521803	0.530971	0.507543	0.50953	0.546912	0.518	0.524189	0.524541	0.521526	0.525311	0.50775	0.516042	0.517704	0.495307	0.528065	0.518743	0.522357	0.51716	0.521108	0.512408	0.540307	0.507359	0.521064	0.523778	0.515529	0.504427	0.522652	0.507067	0.512498	0.51247	0.521483	0.531263	0.524612	0.522403	0.526586
1241.93	0.531084	0.514157	0.535346	0.503824	0.509768	0.522501	0.531678	0.508244	0.510219	0.547608	0.518695	0.524881	0.525232	0.522222	0.526011	0.508449	0.516744	0.518399	0.496003	0.528758	0.519434	0.523045	0.517842	0.521806	0.513109	0.540997	0.508053	0.521759	0.524475	0.516237	0.505132	0.523359	0.507764	0.513192	0.51316	0.522177	0.531966	0.525297	0.523102	0.527289
1241.31	0.531784	0.514856	0.536044	0.504522	0.510464	0.5232	0.532386	0.50895	0.510917	0.548314	0.519398	0.525581	0.525934	0.522929	0.526717	0.509155	0.517454	0.519103	0.496705	0.529451	0.520136	0.523742	0.518536	0.522509	0.513817	0.541697	0.508755	0.522453	0.525177	0.516949	0.505839	0.524069	0.508469	0.513896	0.513862	0.522878	0.532674	0.525986	0.523807	0.528
1240.69	0.532493	0.515565	0.536743	0.505225	0.511169	0.523903	0.533092	0.509658	0.511626	0.54903	0.520109	0.526288	0.526648	0.523642	0.527428	0.509866	0.518171	0.519813	0.49741	0.530146	0.520848	0.524452	0.519242	0.523214	0.51453	0.542406	0.509463	0.523152	0.525887	0.517662	0.506547	0.524777	0.509174	0.514602	0.514572	0.52359	0.533385	0.526686	0.524517	0.528718
1240.08	0.533213	0.516279	0.537444	0.505935	0.51188	0.524615	0.533797	0.510373	0.512341	0.549751	0.520824	0.526996	0.527366	0.524355	0.528145	0.510584	0.518893	0.520527	0.49812	0.530844	0.521567	0.52517	0.519957	0.523924	0.51525	0.543117	0.510173	0.523856	0.526602	0.518376	0.507261	0.525486	0.509881	0.515308	0.515282	0.524313	0.534099	0.527395	0.52523	0.529442
1239.46	0.533938	0.516996	0.538149	0.506644	0.512591	0.52533	0.534504	0.51109	0.513058	0.550475	0.52154	0.527705	0.528085	0.525067	0.528868	0.511305	0.519618	0.521245	0.498832	0.531545	0.522288	0.525888	0.520672	0.524638	0.515976	0.543829	0.510882	0.524566	0.527319	0.519091	0.507978	0.526197	0.510595	0.516018	0.515995	0.525041	0.53482	0.528106	0.525942	0.530168
1238.85	0.534662	0.517709	0.538854	0.50735	0.513299	0.526041	0.535212	0.511806	0.513776	0.551204	0.522259	0.528415	0.528808	0.525783	0.529592	0.512025	0.520346	0.521968	0.499547	0.532251	0.523005	0.526604	0.521381	0.525356	0.5167	0.544542	0.511588	0.525277	0.528036	0.519812	0.508696	0.526909	0.511312	0.516734	0.516711	0.52577	0.535544	0.528814	0.526654	0.530889
1238.24	0.535384	0.518422	0.53956	0.508057	0.514011	0.526747	0.535924	0.51252	0.514499	0.551936	0.522984	0.529131	0.52954	0.52651	0.530318	0.512745	0.521079	0.522698	0.500266	0.532961	0.52372	0.527325	0.522091	0.526076	0.517423	0.545262	0.512295	0.525988	0.528752	0.520539	0.509415	0.527626	0.512029	0.517456	0.517431	0.526496	0.536268	0.529522	0.527371	0.531608
1237.62	0.536105	0.51914	0.540268	0.508773	0.514733	0.527458	0.536645	0.51324	0.51523	0.55267	0.523718	0.529855	0.53028	0.527244	0.531048	0.513471	0.521816	0.523434	0.500991	0.533676	0.52444	0.528055	0.522809	0.526799	0.518151	0.545988	0.513011	0.526704	0.52947	0.521273	0.510139	0.528353	0.512748	0.518181	0.518152	0.527224	0.536997	0.53024	0.528096	0.532329
1237.01	0.536831	0.519866	0.540984	0.509498	0.515464	0.528181	0.537376	0.51397	0.515963	0.553402	0.524455	0.530582	0.531021	0.52798	0.531783	0.514202	0.522555	0.52417	0.501722	0.534394	0.525168	0.52879	0.523536	0.527528	0.518888	0.546717	0.513737	0.527427	0.53019	0.522008	0.510871	0.529089	0.513474	0.518908	0.518873	0.527957	0.537735	0.530968	0.528829	0.533058
1236.4	0.537561	0.520595	0.541705	0.510224	0.516195	0.528909	0.538111	0.514704	0.516696	0.554134	0.52519	0.531311	0.531756	0.528712	0.532521	0.514936	0.523292	0.524903	0.502454	0.535116	0.525904	0.529525	0.524264	0.528261	0.519635	0.54744	0.514466	0.528152	0.530914	0.522743	0.511607	0.529824	0.514206	0.519634	0.519593	0.528695	0.53848	0.531698	0.529564	0.533791
1235.79	0.538292	0.521322	0.542426	0.510945	0.516921	0.529634	0.538842	0.515432	0.517426	0.554867	0.525923	0.53204	0.532487	0.529444	0.533259	0.51567	0.524027	0.525632	0.503185	0.535839	0.526646	0.530256	0.524991	0.528997	0.520383	0.54816	0.515192	0.528877	0.531643	0.523477	0.512344	0.530548	0.514936	0.520358	0.520311	0.529435	0.539227	0.532422	0.530298	0.534524
1235.18	0.539024	0.522047	0.543143	0.511662	0.517643	0.530354	0.539569	0.516157	0.51816	0.555603	0.526655	0.532768	0.533219	0.530179	0.533999	0.516406	0.524765	0.526363	0.503916	0.536564	0.527387	0.530984	0.525715	0.529733	0.521129	0.54888	0.515914	0.529598	0.532375	0.52421	0.51308	0.531269	0.515661	0.521085	0.521031	0.530175	0.53997	0.533141	0.531032	0.535257
1234.57	0.539758	0.522773	0.543857	0.512377	0.518368	0.531075	0.540298	0.516884	0.5189	0.556342	0.527388	0.533496	0.533955	0.530917	0.534741	0.517147	0.525508	0.527097	0.504648	0.53729	0.528125	0.531714	0.526434	0.53047	0.521869	0.549604	0.516635	0.530317	0.533108	0.524946	0.513817	0.531995	0.51639	0.521819	0.521758	0.530915	0.540709	0.533861	0.531766	0.53599
1233.96	0.540495	0.523501	0.544576	0.513096	0.5191	0.531804	0.541033	0.517618	0.519645	0.557081	0.528124	0.534226	0.534694	0.531656	0.535489	0.51789	0.526255	0.527834	0.505379	0.538016	0.52886	0.532447	0.527149	0.531206	0.522603	0.550331	0.517356	0.531037	0.53384	0.525686	0.514553	0.532729	0.517126	0.522559	0.522492	0.531651	0.541447	0.534585	0.5325	0.536727
1233.35	0.541236	0.524231	0.545299	0.513819	0.519833	0.532539	0.541773	0.518353	0.520393	0.557823	0.528862	0.534958	0.53544	0.532394	0.536239	0.518633	0.527001	0.528573	0.506109	0.53874	0.529591	0.533184	0.527865	0.531937	0.523337	0.551062	0.518078	0.531762	0.534571	0.526428	0.515289	0.533465	0.517865	0.523298	0.523227	0.532386	0.542187	0.535312	0.533233	0.537466
1232.74	0.54198	0.524962	0.546025	0.514544	0.52056	0.533272	0.542509	0.519085	0.521139	0.558568	0.529602	0.535691	0.53619	0.533133	0.536987	0.519376	0.527745	0.529311	0.506839	0.539463	0.53032	0.533922	0.528586	0.532668	0.524074	0.551795	0.518803	0.532491	0.535302	0.527171	0.516027	0.534198	0.518603	0.524032	0.523961	0.533125	0.542925	0.536041	0.533965	0.538204
1232.13	0.542724	0.525693	0.546748	0.51527	0.52128	0.533997	0.543239	0.519814	0.52188	0.559311	0.530341	0.536421	0.53694	0.533871	0.53773	0.520116	0.528486	0.530049	0.50757	0.540188	0.531047	0.534657	0.529313	0.5334	0.524815	0.552531	0.519529	0.53322	0.536033	0.527911	0.516765	0.534927	0.519337	0.524761	0.524691	0.533868	0.543659	0.536769	0.534694	0.538938
1231.53	0.543463	0.526421	0.54747	0.515997	0.521999	0.534717	0.543962	0.520541	0.522613	0.560049	0.531078	0.537146	0.537683	0.534606	0.538465	0.520852	0.529226	0.530785	0.508305	0.540919	0.531775	0.535389	0.53004	0.534131	0.525555	0.553261	0.520256	0.533946	0.536763	0.528648	0.517502	0.535656	0.520068	0.52549	0.52542	0.534611	0.544394	0.537494	0.53542	0.539668
1230.92	0.544199	0.527151	0.548194	0.516724	0.522725	0.535441	0.544685	0.52127	0.523341	0.560781	0.531811	0.537867	0.538418	0.535338	0.5392	0.521583	0.529969	0.531518	0.509039	0.541651	0.532511	0.536118	0.530766	0.53486	0.526292	0.553986	0.520985	0.534667	0.537491	0.529384	0.518237	0.536389	0.520802	0.526221	0.526151	0.535349	0.545132	0.538216	0.536146	0.540402
1230.31	0.544935	0.527886	0.548924	0.517452	0.523459	0.536174	0.545412	0.522004	0.524074	0.561516	0.532545	0.538593	0.539149	0.53607	0.539937	0.522316	0.530712	0.532247	0.509772	0.542382	0.533253	0.536848	0.53149	0.535588	0.527029	0.554711	0.521714	0.535389	0.538223	0.530124	0.51897	0.537126	0.52154	0.526953	0.526885	0.536085	0.545874	0.53894	0.536877	0.541143
1229.71	0.54567	0.528624	0.549657	0.518182	0.524196	0.536912	0.546144	0.522744	0.524814	0.562259	0.533281	0.539322	0.539883	0.536807	0.540678	0.523054	0.531455	0.532975	0.510501	0.543114	0.533997	0.537583	0.532217	0.53632	0.527768	0.555441	0.522442	0.536113	0.538961	0.530867	0.519706	0.537863	0.52228	0.527687	0.527623	0.53682	0.546616	0.539666	0.537613	0.541888
1229.11	0.546403	0.529359	0.550385	0.518913	0.524929	0.537645	0.546878	0.523486	0.525553	0.563004	0.534016	0.540053	0.540618	0.537544	0.541421	0.523792	0.532199	0.533703	0.511228	0.543849	0.534735	0.538319	0.532943	0.537055	0.528507	0.556174	0.523167	0.53684	0.5397	0.531609	0.520444	0.538596	0.523016	0.528423	0.528358	0.537556	0.547357	0.540394	0.538352	0.542626
1228.5	0.547137	0.530091	0.551108	0.519641	0.525656	0.53837	0.547611	0.524224	0.526285	0.563742	0.534747	0.540781	0.541353	0.538279	0.542163	0.524525	0.532943	0.534433	0.511954	0.544586	0.535467	0.539054	0.533667	0.537786	0.529244	0.556905	0.523892	0.537568	0.540434	0.532348	0.52118	0.539327	0.523745	0.529158	0.529088	0.538295	0.548098	0.541123	0.53909	0.543358
1227.9	0.547872	0.530823	0.55183	0.520367	0.526383	0.539092	0.548343	0.524958	0.527013	0.564474	0.535476	0.541504	0.542085	0.539013	0.542904	0.525253	0.533685	0.535164	0.512681	0.545319	0.536194	0.539784	0.534388	0.538509	0.529975	0.557633	0.524616	0.538294	0.541162	0.533084	0.52191	0.540058	0.524472	0.529892	0.529813	0.539036	0.548835	0.541851	0.539829	0.54409
1227.3	0.548604	0.531556	0.552555	0.521089	0.527112	0.539817	0.549078	0.525688	0.527741	0.565202	0.536204	0.542224	0.542816	0.539747	0.543645	0.525982	0.534423	0.535896	0.513412	0.546047	0.53692	0.540511	0.535108	0.539226	0.5307	0.55836	0.525339	0.539017	0.541886	0.533819	0.522639	0.540788	0.525202	0.530625	0.530539	0.539774	0.549564	0.542578	0.540568	0.544824
1226.69	0.549329	0.532284	0.553283	0.52181	0.527842	0.540543	0.549813	0.526417	0.528471	0.565928	0.53693	0.542943	0.54355	0.540478	0.544388	0.526716	0.535159	0.53663	0.514145	0.54677	0.537643	0.541236	0.535825	0.539947	0.531422	0.559088	0.526059	0.539739	0.542611	0.534554	0.523368	0.541518	0.525936	0.531356	0.531266	0.540506	0.550286	0.543301	0.541305	0.545561
1226.09	0.550047	0.53301	0.55401	0.52253	0.528567	0.541267	0.550545	0.527143	0.529198	0.566653	0.53765	0.543661	0.544284	0.541207	0.545131	0.527454	0.535893	0.537367	0.514874	0.54749	0.538365	0.541959	0.536536	0.540672	0.532146	0.559814	0.526775	0.540459	0.543337	0.535287	0.5241	0.542247	0.526669	0.532087	0.531991	0.541234	0.551009	0.544021	0.542036	0.546294
1225.49	0.550766	0.533737	0.554738	0.523248	0.529287	0.541987	0.55127	0.527868	0.529921	0.567376	0.538365	0.544378	0.545016	0.541936	0.545872	0.528188	0.536625	0.538102	0.515596	0.548209	0.539087	0.54268	0.537243	0.541396	0.532871	0.560536	0.527487	0.541175	0.544061	0.536017	0.524829	0.542975	0.527399	0.532815	0.532714	0.541963	0.551732	0.544736	0.542762	0.547024
1224.89	0.551489	0.534466	0.555466	0.523962	0.530005	0.542705	0.551991	0.528593	0.530643	0.568098	0.539079	0.54509	0.545741	0.542664	0.546609	0.528916	0.537354	0.53883	0.516313	0.548928	0.539807	0.543397	0.537948	0.542116	0.533594	0.561254	0.528196	0.541885	0.54478	0.536745	0.525551	0.5437	0.528128	0.53354	0.533434	0.542694	0.552454	0.545451	0.543483	0.547753
1224.29	0.552212	0.535193	0.55619	0.524675	0.530725	0.543423	0.552712	0.529319	0.531368	0.568819	0.539798	0.545798	0.546462	0.543389	0.547342	0.52964	0.538081	0.539552	0.517027	0.54965	0.540529	0.544114	0.538656	0.542831	0.534311	0.561967	0.528905	0.542592	0.545497	0.537475	0.526269	0.544423	0.528857	0.534261	0.534156	0.543421	0.553171	0.546163	0.544202	0.548482
1223.69	0.552933	0.535916	0.556913	0.52539	0.531447	0.544143	0.553436	0.530044	0.532093	0.56954	0.540518	0.546506	0.547183	0.544111	0.548074	0.530366	0.538811	0.540273	0.517741	0.550373	0.541251	0.544831	0.539367	0.543543	0.535024	0.56268	0.529616	0.5433	0.546217	0.538207	0.526989	0.545144	0.529587	0.534983	0.534878	0.54414	0.553886	0.546874	0.544924	0.549214
1223.09	0.553654	0.536639	0.557637	0.526109	0.532172	0.544862	0.554161	0.530769	0.532816	0.570263	0.541238	0.547217	0.547907	0.544834	0.54881	0.531095	0.539548	0.540994	0.518459	0.551097	0.541973	0.545547	0.540077	0.544252	0.535737	0.563396	0.530332	0.544011	0.546941	0.538941	0.527714	0.545865	0.530316	0.535709	0.535599	0.544851	0.554603	0.547586	0.54565	0.549951
1222.49	0.554374	0.537364	0.558364	0.526833	0.532898	0.54558	0.554887	0.531494	0.533538	0.570987	0.541956	0.547932	0.548631	0.545562	0.549546	0.531822	0.540289	0.541714	0.519177	0.551821	0.542697	0.546261	0.540784	0.54496	0.536452	0.564117	0.531049	0.544726	0.547668	0.539671	0.528444	0.546586	0.531042	0.536439	0.53632	0.545562	0.555324	0.548299	0.546381	0.550688
1221.9	0.555092	0.538092	0.559094	0.527558	0.533622	0.546297	0.55561	0.53222	0.534257	0.57171	0.542673	0.548646	0.549351	0.546293	0.550279	0.532542	0.541022	0.542429	0.519892	0.552548	0.543419	0.546973	0.541487	0.545669	0.537167	0.564838	0.531764	0.54544	0.548391	0.540399	0.52917	0.547305	0.531766	0.537167	0.53704	0.546278	0.556047	0.549015	0.547112	0.551425
1221.3	0.555807	0.538819	0.559821	0.528282	0.534341	0.547016	0.556329	0.532946	0.534975	0.572428	0.543392	0.549357	0.550065	0.547023	0.551007	0.533255	0.541744	0.543139	0.520603	0.553277	0.544139	0.547681	0.54219	0.546382	0.53788	0.565558	0.532475	0.546151	0.549108	0.541127	0.529891	0.548021	0.532488	0.53789	0.537759	0.546999	0.55677	0.549732	0.547837	0.552159
1220.7	0.556519	0.539547	0.560543	0.529003	0.535058	0.547735	0.55705	0.533673	0.53569	0.573143	0.544111	0.550065	0.550777	0.547745	0.551736	0.533969	0.542458	0.54385	0.521311	0.554003	0.544854	0.54839	0.542893	0.547097	0.538591	0.566276	0.53318	0.546861	0.549822	0.541857	0.530612	0.548735	0.533212	0.538611	0.538478	0.547719	0.55749	0.550446	0.548557	0.552892
1220.11	0.557231	0.540275	0.561264	0.529724	0.535773	0.548454	0.557777	0.534402	0.536407	0.573858	0.544827	0.55077	0.551492	0.548461	0.552466	0.534692	0.543176	0.544564	0.52202	0.554722	0.545569	0.549101	0.543598	0.547809	0.5393	0.566992	0.533881	0.547573	0.550539	0.542586	0.531334	0.549452	0.53394	0.539334	0.5392	0.548435	0.558208	0.551155	0.549274	0.553623
1219.51	0.557943	0.541004	0.561988	0.530446	0.536492	0.549172	0.558508	0.535129	0.537125	0.574574	0.545536	0.551472	0.552211	0.549178	0.553196	0.53542	0.543901	0.545283	0.522728	0.555438	0.546285	0.549815	0.5443	0.548518	0.540008	0.567706	0.534583	0.548286	0.551261	0.543311	0.532054	0.550175	0.534671	0.540061	0.539922	0.549151	0.558926	0.551861	0.549993	0.554352
1218.92	0.558654	0.541731	0.562714	0.531167	0.537212	0.549888	0.559235	0.535854	0.537844	0.575289	0.546239	0.552171	0.552932	0.549897	0.553923	0.536145	0.544626	0.546003	0.523434	0.556157	0.547002	0.550529	0.544999	0.549226	0.540715	0.568417	0.535283	0.548995	0.551983	0.544034	0.532767	0.550898	0.535401	0.540785	0.540644	0.549868	0.559646	0.552568	0.550714	0.555077
1218.32	0.559363	0.542453	0.563438	0.531883	0.537932	0.550599	0.559954	0.536572	0.53856	0.576	0.546943	0.552869	0.55365	0.550617	0.554647	0.536863	0.545346	0.546718	0.524138	0.556881	0.547719	0.551239	0.545696	0.549934	0.541421	0.569125	0.535981	0.549699	0.552701	0.544759	0.533478	0.551616	0.536126	0.541504	0.541364	0.550589	0.560364	0.553275	0.551434	0.5558
1217.73	0.56007	0.543173	0.564159	0.532596	0.538648	0.551305	0.560669	0.537288	0.539275	0.576707	0.547649	0.553567	0.554365	0.551334	0.55537	0.537575	0.546063	0.547426	0.524842	0.557608	0.548435	0.551945	0.546392	0.550643	0.542129	0.569832	0.536675	0.5504	0.553416	0.545487	0.534193	0.552327	0.536851	0.54222	0.542081	0.551307	0.561078	0.553981	0.55215	0.556523
1217.14	0.560778	0.543894	0.56488	0.533307	0.53936	0.552011	0.561385	0.538002	0.539989	0.577413	0.548357	0.554266	0.55508	0.552046	0.556095	0.538286	0.546783	0.548134	0.525547	0.558332	0.549148	0.552645	0.547086	0.55135	0.542837	0.570536	0.53737	0.551103	0.55413	0.546216	0.53491	0.553038	0.537578	0.542939	0.542794	0.552019	0.561788	0.554685	0.552865	0.557249
1216.55	0.561486	0.544617	0.565601	0.53402	0.540072	0.552721	0.562106	0.538718	0.540704	0.578124	0.549062	0.554964	0.555795	0.55276	0.556823	0.539001	0.547509	0.548845	0.526252	0.559053	0.549858	0.553344	0.547776	0.552053	0.543543	0.57124	0.538069	0.55181	0.554844	0.546943	0.535627	0.553755	0.538308	0.543664	0.543507	0.552729	0.562499	0.555388	0.553582	0.557975
1215.95	0.562192	0.545341	0.566322	0.534733	0.540783	0.553437	0.562828	0.539438	0.54142	0.578839	0.549765	0.555662	0.556511	0.553479	0.557552	0.539718	0.548235	0.54956	0.526956	0.559773	0.550569	0.554045	0.548469	0.552753	0.544245	0.571945	0.538773	0.552519	0.555558	0.547667	0.536342	0.554477	0.539035	0.54439	0.544223	0.553437	0.563214	0.556092	0.554303	0.558702
1215.36	0.562898	0.546063	0.567043	0.535445	0.541496	0.554154	0.563549	0.540159	0.542136	0.579553	0.550468	0.556359	0.557227	0.554201	0.55828	0.540434	0.548956	0.55027	0.527659	0.560492	0.551282	0.55475	0.549168	0.553452	0.544944	0.572652	0.539479	0.553223	0.556271	0.548389	0.537055	0.555199	0.539757	0.545114	0.544945	0.554146	0.563932	0.556797	0.555025	0.559431
1214.77	0.563603	0.546783	0.567762	0.536153	0.542204	0.554866	0.564266	0.540875	0.542845	0.580261	0.551168	0.557054	0.557941	0.554913	0.559006	0.541144	0.549668	0.550971	0.528359	0.561214	0.551996	0.555454	0.54987	0.554153	0.545644	0.573362	0.540184	0.553918	0.556984	0.549109	0.537765	0.55591	0.540475	0.545836	0.545666	0.554853	0.56465	0.557497	0.555744	0.560158
1214.18	0.564309	0.547502	0.568481	0.536861	0.542909	0.555573	0.564974	0.541586	0.543546	0.580959	0.551864	0.557747	0.558649	0.555615	0.559729	0.541849	0.550373	0.551665	0.529055	0.561937	0.552705	0.556153	0.550565	0.554856	0.546344	0.574071	0.540882	0.554605	0.557695	0.549827	0.538476	0.556611	0.541191	0.546556	0.546381	0.555558	0.565362	0.558191	0.556459	0.560882
1213.59	0.56501	0.54822	0.5692	0.537571	0.543611	0.556277	0.565677	0.542292	0.544243	0.581651	0.552556	0.558437	0.559352	0.556316	0.560453	0.542552	0.551079	0.552361	0.529748	0.562655	0.55341	0.556847	0.551251	0.555556	0.547042	0.574775	0.541573	0.555292	0.558403	0.550543	0.539187	0.557312	0.541909	0.547271	0.547088	0.556263	0.566068	0.55888	0.557169	0.561602
1213	0.565702	0.548937	0.569916	0.538281	0.544314	0.556982	0.566378	0.543001	0.544943	0.582345	0.553251	0.559125	0.560053	0.557027	0.561179	0.543258	0.551791	0.553061	0.530445	0.563367	0.554113	0.557541	0.551931	0.556254	0.547736	0.575474	0.542259	0.555985	0.559108	0.55126	0.539901	0.55802	0.542626	0.547981	0.547794	0.55697	0.566771	0.559571	0.557878	0.56232
1212.42	0.566389	0.549654	0.570627	0.538987	0.545018	0.557689	0.567082	0.543712	0.545647	0.583043	0.55395	0.559813	0.560754	0.557745	0.561905	0.543966	0.552504	0.553765	0.531147	0.564073	0.554816	0.558238	0.552611	0.556949	0.548428	0.576171	0.542946	0.556683	0.559811	0.551978	0.540612	0.558733	0.543344	0.548692	0.548506	0.557675	0.567477	0.560264	0.558585	0.563037
1211.83	0.567076	0.550368	0.571334	0.539683	0.545721	0.558391	0.567785	0.54442	0.54635	0.583737	0.554647	0.560498	0.561455	0.558459	0.562624	0.54467	0.553212	0.554467	0.531851	0.56478	0.555521	0.558933	0.553293	0.557644	0.54912	0.576865	0.543632	0.557375	0.560513	0.552694	0.541316	0.559441	0.544062	0.549406	0.549221	0.558374	0.568186	0.560958	0.559289	0.563752
1211.24	0.567768	0.551077	0.572036	0.54037	0.546419	0.559084	0.568486	0.545122	0.547048	0.584425	0.555336	0.561175	0.562152	0.559158	0.563335	0.545369	0.553912	0.555162	0.53255	0.56549	0.556224	0.559621	0.553973	0.558338	0.549812	0.577555	0.544315	0.558057	0.561213	0.553405	0.542011	0.560139	0.544778	0.55012	0.549933	0.559068	0.568896	0.561645	0.559989	0.56446
1210.65	0.56846	0.551779	0.572733	0.541053	0.54711	0.559768	0.569181	0.545819	0.547737	0.585107	0.556011	0.561846	0.562841	0.559842	0.56404	0.546063	0.554609	0.555852	0.533237	0.5662	0.55692	0.5603	0.554647	0.559032	0.550501	0.578243	0.544992	0.558733	0.561908	0.554109	0.542699	0.560829	0.545491	0.550828	0.550635	0.55976	0.569599	0.562325	0.560683	0.565163
1210.07	0.569145	0.552471	0.573423	0.541738	0.547794	0.560445	0.569871	0.54651	0.548419	0.585788	0.556678	0.56251	0.563521	0.56052	0.564742	0.546754	0.555305	0.55654	0.533915	0.566905	0.557609	0.560974	0.555315	0.559718	0.551181	0.578927	0.545664	0.559406	0.562597	0.554806	0.543383	0.561514	0.5462	0.551526	0.55133	0.560453	0.570292	0.563002	0.561371	0.565861
1209.48	0.56982	0.553158	0.574109	0.542423	0.548473	0.561119	0.570556	0.547197	0.549097	0.586463	0.557341	0.563171	0.564194	0.561201	0.56544	0.547444	0.555999	0.557224	0.534588	0.567602	0.558294	0.561644	0.555977	0.560396	0.551852	0.579608	0.546331	0.560078	0.563281	0.5555	0.544068	0.562198	0.546905	0.55222	0.552021	0.561142	0.570978	0.563678	0.562055	0.566554
1208.9	0.570486	0.553844	0.574794	0.543103	0.549143	0.561791	0.571236	0.54788	0.549773	0.587129	0.558003	0.563831	0.564866	0.56188	0.566134	0.54813	0.556689	0.557902	0.535259	0.568293	0.558975	0.562308	0.556635	0.561066	0.552516	0.580282	0.546995	0.560745	0.563959	0.556193	0.544755	0.56288	0.547606	0.552913	0.552709	0.561824	0.571662	0.564349	0.562736	0.567247
1208.31	0.571146	0.554527	0.575474	0.543777	0.549805	0.562459	0.57191	0.54856	0.550446	0.587787	0.558664	0.564487	0.565537	0.562555	0.56682	0.54881	0.557369	0.55857	0.535928	0.568978	0.55965	0.562968	0.557289	0.561735	0.553177	0.580949	0.547653	0.561405	0.564631	0.556884	0.545438	0.563558	0.548302	0.553605	0.553391	0.562499	0.572344	0.565011	0.563414	0.567939
1207.73	0.571801	0.555203	0.576144	0.544445	0.550461	0.563119	0.572576	0.549235	0.551113	0.588442	0.559317	0.565135	0.566203	0.563223	0.567496	0.549483	0.558041	0.559229	0.536589	0.569659	0.560319	0.563622	0.557937	0.562403	0.553835	0.58161	0.548304	0.562058	0.565296	0.557565	0.54611	0.564229	0.54899	0.554288	0.554062	0.56317	0.573023	0.565662	0.564085	0.568627
1207.15	0.572448	0.555869	0.5768	0.545105	0.551113	0.563767	0.573234	0.5499	0.551771	0.589093	0.559959	0.565772	0.566858	0.563886	0.568163	0.550148	0.558705	0.55988	0.537242	0.570334	0.560978	0.564268	0.558579	0.563065	0.554487	0.582263	0.548944	0.5627	0.565954	0.558233	0.546768	0.564888	0.549668	0.554959	0.554726	0.563835	0.573697	0.566305	0.564746	0.569307
1206.56	0.573083	0.556529	0.577442	0.545754	0.551762	0.564406	0.573881	0.550553	0.552417	0.589734	0.56059	0.566396	0.567503	0.564544	0.568823	0.550804	0.559363	0.560524	0.537883	0.571003	0.561626	0.564906	0.559209	0.563716	0.555128	0.582907	0.549576	0.563332	0.566605	0.558893	0.547416	0.565536	0.550335	0.555618	0.555386	0.564487	0.57436	0.566944	0.565396	0.569975
1205.98	0.573706	0.557182	0.578079	0.54639	0.552402	0.56504	0.574515	0.551196	0.553048	0.590362	0.561209	0.56701	0.56814	0.565191	0.569478	0.551448	0.56001	0.561157	0.538513	0.571659	0.562264	0.565537	0.559827	0.564353	0.555758	0.583537	0.5502	0.563955	0.567247	0.559549	0.548055	0.566174	0.550992	0.556271	0.556038	0.565124	0.575009	0.567575	0.566037	0.570635
1205.4	0.574323	0.557824	0.578709	0.547012	0.553026	0.565667	0.575135	0.551828	0.553666	0.590975	0.561817	0.567614	0.568767	0.565823	0.570122	0.552079	0.560641	0.56178	0.539134	0.5723	0.562891	0.566157	0.560434	0.564976	0.556377	0.584155	0.550816	0.564567	0.567878	0.560199	0.548687	0.566804	0.551642	0.556918	0.556678	0.565751	0.575645	0.568194	0.566669	0.571285
1204.82	0.574933	0.558448	0.579329	0.54762	0.553632	0.566278	0.575746	0.552446	0.554272	0.591576	0.562411	0.56821	0.569378	0.566435	0.570754	0.552697	0.561257	0.562391	0.539741	0.572928	0.563508	0.566761	0.561031	0.565587	0.556983	0.584764	0.551419	0.565166	0.568496	0.560837	0.549305	0.567421	0.55228	0.55755	0.5573	0.566373	0.576269	0.568796	0.567288	0.571922
1204.24	0.575531	0.559053	0.57993	0.548215	0.554221	0.566871	0.576347	0.553044	0.554868	0.592163	0.56299	0.568792	0.569972	0.567027	0.571371	0.553302	0.561857	0.562988	0.540333	0.573544	0.564113	0.567348	0.561612	0.566184	0.557576	0.58536	0.552003	0.56575	0.569102	0.561457	0.549908	0.568019	0.552904	0.558162	0.557907	0.566987	0.576881	0.569383	0.567893	0.572541
1203.66	0.57611	0.559643	0.58051	0.548793	0.554794	0.567445	0.576933	0.553623	0.55545	0.592734	0.563554	0.569354	0.570548	0.567606	0.571974	0.55389	0.562445	0.56357	0.540911	0.574147	0.564702	0.56792	0.562171	0.56677	0.558156	0.585938	0.552566	0.566315	0.569692	0.562058	0.550494	0.568597	0.553509	0.558758	0.558501	0.567583	0.577476	0.569956	0.568481	0.573138
1203.08	0.576669	0.560222	0.581071	0.549356	0.555351	0.568003	0.577498	0.554189	0.556015	0.593285	0.564102	0.569892	0.571107	0.568174	0.572565	0.554461	0.563021	0.564137	0.541479	0.574732	0.565274	0.568478	0.56271	0.567343	0.558721	0.586496	0.553112	0.566864	0.570258	0.562641	0.551062	0.569158	0.554098	0.559343	0.559081	0.568153	0.578051	0.570513	0.569052	0.573719
1202.5	0.577209	0.560786	0.581613	0.549903	0.55589	0.568543	0.578043	0.554745	0.55656	0.593815	0.564632	0.570407	0.571645	0.568728	0.573135	0.555016	0.563582	0.56469	0.542035	0.575293	0.565825	0.569019	0.563231	0.567896	0.559266	0.587034	0.553644	0.567397	0.570801	0.563207	0.551613	0.569709	0.554671	0.559914	0.559642	0.568699	0.578606	0.571053	0.569605	0.574284
1201.92	0.577726	0.561328	0.582134	0.550429	0.556407	0.569061	0.578571	0.555283	0.557081	0.594321	0.56514	0.570902	0.572163	0.569262	0.57368	0.555555	0.564124	0.565223	0.54257	0.575831	0.566355	0.56954	0.563739	0.568425	0.559783	0.587556	0.554158	0.567912	0.571322	0.563753	0.552143	0.57025	0.555226	0.560463	0.560181	0.569228	0.579143	0.571571	0.570138	0.574835
1201.35	0.578218	0.561844	0.582633	0.550932	0.556904	0.569557	0.579081	0.555795	0.557582	0.594804	0.565624	0.57138	0.572662	0.569774	0.574196	0.556073	0.564643	0.565732	0.543075	0.57635	0.566864	0.570038	0.564228	0.568928	0.560276	0.588059	0.55465	0.568404	0.571825	0.564276	0.552653	0.570769	0.55576	0.560982	0.560698	0.56974	0.579663	0.572068	0.570646	0.575365
1200.77	0.578686	0.562335	0.583106	0.551408	0.557378	0.57003	0.579566	0.556277	0.558061	0.595266	0.56608	0.571839	0.573138	0.570262	0.574687	0.556563	0.565138	0.566211	0.543547	0.576852	0.567349	0.570511	0.564694	0.569407	0.560747	0.588542	0.555117	0.568871	0.57231	0.564773	0.553141	0.571258	0.556269	0.561476	0.561194	0.570234	0.580164	0.572541	0.571125	0.575869
1200.19	0.579131	0.562799	0.583555	0.551857	0.557826	0.570476	0.58002	0.556731	0.558512	0.595704	0.566509	0.572272	0.573587	0.570726	0.575154	0.557026	0.565604	0.566661	0.543994	0.577326	0.567806	0.57096	0.565134	0.569865	0.561195	0.588995	0.555557	0.569311	0.572772	0.565242	0.5536	0.571715	0.556752	0.561948	0.561665	0.570703	0.580638	0.572988	0.571574	0.576346
1199.62	0.579548	0.563232	0.583978	0.552277	0.558246	0.570893	0.580441	0.557157	0.558933	0.596114	0.566912	0.572674	0.574005	0.571157	0.575598	0.557461	0.566043	0.567086	0.544421	0.577768	0.56823	0.571381	0.565546	0.570295	0.561616	0.589413	0.55597	0.569721	0.573204	0.565683	0.554029	0.572147	0.557209	0.5624	0.562109	0.571142	0.581081	0.573405	0.571997	0.576795
1199.04	0.579936	0.563629	0.584372	0.552666	0.558633	0.571278	0.580833	0.557556	0.559323	0.596494	0.567286	0.573045	0.574394	0.571553	0.576014	0.557868	0.566453	0.567484	0.544824	0.578176	0.568622	0.571772	0.565926	0.570692	0.562003	0.589798	0.556355	0.570097	0.573601	0.566097	0.554427	0.572552	0.557634	0.562823	0.562524	0.571547	0.58149	0.573791	0.572394	0.577215
1198.47	0.580294	0.563992	0.584734	0.553023	0.558989	0.571631	0.581195	0.557925	0.559684	0.596841	0.567628	0.573384	0.574752	0.571915	0.576399	0.558244	0.566834	0.567854	0.545197	0.578551	0.568982	0.57213	0.566271	0.571056	0.562357	0.590151	0.556708	0.570442	0.573965	0.566484	0.554797	0.572926	0.558024	0.563211	0.562908	0.571919	0.581868	0.574144	0.572766	0.577603
1197.89	0.580621	0.564326	0.585059	0.553346	0.559312	0.571955	0.581522	0.55826	0.560013	0.597153	0.567935	0.573688	0.575078	0.572246	0.57675	0.558582	0.567183	0.56819	0.545533	0.578893	0.56931	0.572452	0.566578	0.57139	0.562681	0.590478	0.557023	0.570758	0.574297	0.566842	0.555137	0.573264	0.55838	0.563564	0.563258	0.572257	0.58221	0.574469	0.573109	0.577957
1197.32	0.580911	0.564627	0.585345	0.553632	0.559596	0.572246	0.58181	0.558555	0.560306	0.597427	0.568206	0.573956	0.575366	0.572547	0.577061	0.558883	0.567489	0.568488	0.545832	0.579199	0.569603	0.572734	0.56685	0.571693	0.562975	0.590771	0.557301	0.571042	0.574595	0.567167	0.555442	0.573563	0.558702	0.563884	0.563568	0.572561	0.582515	0.574762	0.573414	0.578279
1196.74	0.581158	0.564892	0.585592	0.55388	0.55984	0.572496	0.58206	0.55881	0.560559	0.597664	0.568438	0.574183	0.575613	0.57281	0.577331	0.559147	0.56775	0.568749	0.54609	0.579467	0.56986	0.572977	0.567088	0.571961	0.563228	0.591022	0.557543	0.571286	0.574852	0.56745	0.555704	0.573827	0.558989	0.56417	0.563837	0.57283	0.582783	0.575017	0.573675	0.578565
1196.17	0.58136	0.565115	0.585797	0.554089	0.560041	0.572701	0.582275	0.559024	0.560772	0.597863	0.568628	0.574369	0.575822	0.573029	0.577561	0.559375	0.567969	0.568973	0.546308	0.579694	0.570077	0.57318	0.567293	0.572184	0.563437	0.591231	0.557749	0.571487	0.575067	0.567688	0.555923	0.574058	0.559239	0.564417	0.564068	0.57306	0.583017	0.575228	0.573892	0.578811
1195.6	0.58152	0.565295	0.585959	0.554257	0.560202	0.572863	0.582455	0.559199	0.560948	0.598027	0.568776	0.574513	0.575994	0.573204	0.577755	0.559567	0.568153	0.569159	0.546484	0.579884	0.570252	0.573346	0.56746	0.572358	0.563602	0.591403	0.557918	0.571644	0.57524	0.567882	0.556101	0.574251	0.559451	0.564621	0.564265	0.573246	0.583213	0.575394	0.574071	0.579016
1195.03	0.581641	0.565435	0.586079	0.554384	0.560321	0.572986	0.582595	0.559334	0.561082	0.598149	0.568883	0.574614	0.576124	0.573339	0.577909	0.559717	0.568301	0.569307	0.546619	0.580036	0.570382	0.573471	0.567581	0.572488	0.56373	0.591538	0.558044	0.571763	0.575378	0.568034	0.556239	0.574402	0.559622	0.564782	0.564427	0.573388	0.583368	0.57552	0.574212	0.579177
1194.46	0.581724	0.565533	0.586159	0.554465	0.560396	0.57307	0.582685	0.559427	0.56117	0.598225	0.568949	0.574675	0.576208	0.573437	0.57802	0.559821	0.568408	0.569412	0.546715	0.58015	0.570468	0.573553	0.567653	0.572582	0.563822	0.591633	0.558126	0.571845	0.575479	0.568145	0.556335	0.574504	0.559749	0.5649	0.564547	0.57349	0.58348	0.57561	0.574316	0.579296
1193.89	0.581765	0.565585	0.586199	0.554502	0.560424	0.57311	0.582725	0.559477	0.561209	0.598251	0.568973	0.574696	0.576243	0.573497	0.578087	0.559877	0.56847	0.569471	0.546769	0.580219	0.570512	0.573589	0.567679	0.572638	0.563873	0.591681	0.558166	0.571881	0.575537	0.568214	0.556387	0.574559	0.559832	0.564973	0.564619	0.573554	0.583548	0.575661	0.574378	0.579369
1193.32	0.581764	0.565587	0.586197	0.554494	0.560409	0.573104	0.582721	0.559481	0.561201	0.59823	0.568949	0.574673	0.576231	0.573512	0.578108	0.559889	0.568488	0.569481	0.546778	0.580239	0.570512	0.573582	0.567663	0.57265	0.563873	0.591682	0.558161	0.571869	0.575548	0.568238	0.556392	0.57457	0.559872	0.565001	0.564643	0.573578	0.583572	0.575667	0.574391	0.579398
1192.75	0.581718	0.565541	0.586147	0.554448	0.560355	0.57305	0.582678	0.559439	0.561147	0.598165	0.568877	0.574606	0.57618	0.573478	0.578085	0.559862	0.568464	0.569446	0.54674	0.580211	0.570464	0.573532	0.567609	0.572613	0.563824	0.591641	0.55811	0.571808	0.575511	0.568218	0.556353	0.574543	0.55987	0.564985	0.564621	0.573557	0.583551	0.575627	0.574352	0.579385
1192.18	0.581625	0.565452	0.586051	0.554365	0.560265	0.572954	0.582598	0.559351	0.561054	0.598059	0.568765	0.574496	0.576092	0.573399	0.578018	0.559796	0.568399	0.569371	0.54666	0.580138	0.57037	0.57344	0.567514	0.572531	0.563734	0.591558	0.558017	0.571706	0.575431	0.568158	0.556275	0.574476	0.559829	0.56493	0.564556	0.573493	0.583488	0.575545	0.574269	0.579335
1191.61	0.581491	0.565328	0.585915	0.554243	0.560138	0.57282	0.582478	0.559222	0.560925	0.597916	0.568618	0.574345	0.575966	0.573281	0.577911	0.559692	0.568294	0.569261	0.546544	0.580027	0.57024	0.573308	0.567381	0.572412	0.563608	0.591436	0.557885	0.571572	0.575314	0.568061	0.55616	0.57437	0.559748	0.564839	0.564451	0.573388	0.583387	0.575429	0.57415	0.579249
1191.04	0.581325	0.565172	0.585741	0.55408	0.55997	0.572651	0.582321	0.559054	0.560761	0.597738	0.568437	0.574157	0.575804	0.573129	0.577765	0.559548	0.568148	0.569113	0.546396	0.57988	0.570079	0.573137	0.56721	0.57226	0.56345	0.591275	0.557717	0.571408	0.57516	0.567928	0.556011	0.574227	0.55963	0.564715	0.564312	0.573248	0.583251	0.575277	0.574003	0.579128
1190.48	0.581131	0.564977	0.585532	0.553872	0.559766	0.572449	0.58213	0.55885	0.560561	0.597527	0.568219	0.573936	0.575602	0.572943	0.577583	0.559366	0.567966	0.56893	0.546213	0.579699	0.569886	0.572929	0.566997	0.572076	0.563254	0.591079	0.557517	0.571212	0.574972	0.56776	0.555825	0.574047	0.559474	0.564555	0.564145	0.573073	0.583078	0.575087	0.573825	0.578968
1189.91	0.580906	0.564744	0.585291	0.553628	0.559529	0.572215	0.581904	0.558613	0.560327	0.597282	0.567963	0.573683	0.575364	0.572721	0.577369	0.559152	0.567755	0.568715	0.545995	0.579486	0.569656	0.572688	0.566748	0.571857	0.563021	0.590849	0.557286	0.57098	0.574751	0.567559	0.555604	0.573833	0.559281	0.56436	0.563954	0.572866	0.58287	0.574859	0.57361	0.578768
1189.34	0.580646	0.564476	0.585021	0.553358	0.55926	0.571951	0.581646	0.55835	0.560063	0.597008	0.567678	0.5734	0.575095	0.572464	0.577128	0.558911	0.567521	0.568476	0.545747	0.579244	0.569392	0.572418	0.56647	0.571605	0.562757	0.590593	0.557026	0.570713	0.574502	0.56733	0.555355	0.573592	0.559059	0.564134	0.563738	0.572627	0.582629	0.5746	0.57336	0.578536
1188.78	0.580354	0.564187	0.584728	0.553067	0.558962	0.571659	0.581362	0.558066	0.559775	0.596711	0.567375	0.573094	0.574802	0.572181	0.576864	0.558645	0.567264	0.568216	0.545478	0.578976	0.569104	0.572123	0.566174	0.571328	0.562472	0.590315	0.556741	0.570417	0.57423	0.56708	0.555083	0.573328	0.558816	0.563882	0.563495	0.572366	0.582368	0.57432	0.573083	0.578279
1188.21	0.580042	0.563885	0.584416	0.552755	0.558638	0.571343	0.581057	0.557763	0.559468	0.596391	0.567056	0.572767	0.574489	0.57188	0.576583	0.558357	0.566982	0.567933	0.54519	0.578687	0.5688	0.571807	0.56586	0.571032	0.562174	0.590019	0.556433	0.570097	0.573938	0.56681	0.554788	0.57304	0.558557	0.563614	0.563223	0.572088	0.582097	0.574026	0.572784	0.578006
1187.65	0.57972	0.56357	0.584089	0.552422	0.558298	0.571011	0.580738	0.557441	0.559145	0.596056	0.56672	0.572423	0.574162	0.571566	0.576287	0.558048	0.566679	0.567626	0.544884	0.578381	0.568482	0.571476	0.565531	0.57072	0.561865	0.589703	0.556107	0.569761	0.573627	0.566519	0.554471	0.572736	0.558284	0.563332	0.562926	0.571796	0.581817	0.573717	0.572467	0.577719
1187.08	0.579392	0.563239	0.583749	0.552073	0.557951	0.570668	0.580405	0.557104	0.55881	0.595707	0.566363	0.572063	0.573824	0.571241	0.575976	0.557726	0.56636	0.567303	0.544563	0.578064	0.568148	0.571133	0.56519	0.570395	0.561545	0.589368	0.555766	0.569413	0.573298	0.566206	0.55414	0.57242	0.557997	0.563037	0.562612	0.571491	0.581521	0.573392	0.57214	0.577417
1186.52	0.579058	0.562891	0.583399	0.551718	0.557598	0.570315	0.580059	0.556759	0.558467	0.595348	0.565991	0.571693	0.573476	0.570906	0.575653	0.5574	0.566035	0.566977	0.544232	0.577741	0.567803	0.570784	0.56484	0.570063	0.561216	0.589024	0.555415	0.569058	0.572957	0.565883	0.553804	0.5721	0.557697	0.562726	0.562292	0.571175	0.581204	0.573052	0.571806	0.577105
1185.96	0.578719	0.562534	0.583043	0.551364	0.557237	0.569957	0.579701	0.55641	0.558118	0.594979	0.565613	0.571317	0.573121	0.570567	0.575321	0.557073	0.565709	0.566652	0.543898	0.577414	0.56745	0.570426	0.564483	0.569731	0.560878	0.588679	0.55506	0.568698	0.572611	0.56556	0.553467	0.571776	0.557386	0.562402	0.561967	0.570854	0.580875	0.572703	0.571467	0.576785
1185.4	0.578379	0.562178	0.582685	0.551012	0.556873	0.569599	0.579341	0.55606	0.557765	0.594606	0.565234	0.570943	0.572761	0.570229	0.574989	0.556746	0.565381	0.566329	0.543567	0.577082	0.5671	0.570062	0.56412	0.569401	0.560534	0.588335	0.554704	0.568338	0.572264	0.565243	0.553129	0.571447	0.557071	0.562079	0.56164	0.570534	0.580545	0.572351	0.571124	0.576462
1184.83	0.578043	0.561831	0.582329	0.550664	0.556513	0.569248	0.578988	0.555711	0.557414	0.594238	0.56486	0.570575	0.572405	0.569897	0.574661	0.556421	0.565056	0.566005	0.543242	0.576752	0.566758	0.569697	0.563757	0.56907	0.560189	0.58799	0.554351	0.567982	0.571922	0.564933	0.552792	0.571117	0.556761	0.561765	0.561315	0.570218	0.580222	0.572001	0.570779	0.576142
1184.27	0.577715	0.561491	0.581977	0.550318	0.556164	0.568907	0.578651	0.555364	0.557067	0.593881	0.564494	0.570216	0.572057	0.56957	0.574339	0.5561	0.564737	0.565681	0.542921	0.576429	0.566425	0.569341	0.563399	0.568739	0.559852	0.587647	0.554002	0.567633	0.571586	0.564626	0.552461	0.570792	0.556461	0.561458	0.560997	0.569906	0.579905	0.571656	0.570436	0.575826
1183.71	0.577396	0.561158	0.581634	0.549977	0.555822	0.568572	0.578326	0.555025	0.556732	0.593535	0.564136	0.569863	0.571719	0.569248	0.574026	0.555788	0.56443	0.565361	0.542606	0.576118	0.566101	0.568999	0.563052	0.568416	0.559525	0.587312	0.55366	0.567292	0.571255	0.564318	0.552137	0.570473	0.556171	0.561154	0.560694	0.5696	0.579594	0.571317	0.5701	0.575514
1183.15	0.577087	0.560836	0.5813	0.549644	0.555488	0.568244	0.578009	0.554699	0.55641	0.593197	0.563788	0.569517	0.571392	0.568933	0.573724	0.555484	0.564135	0.565053	0.542298	0.575821	0.565782	0.568669	0.562713	0.568105	0.559208	0.58699	0.55333	0.566957	0.570932	0.564011	0.55182	0.570165	0.555887	0.560855	0.560402	0.569304	0.579292	0.570987	0.56977	0.57521
1182.59	0.576789	0.560529	0.580978	0.549325	0.555166	0.567928	0.577702	0.554392	0.556103	0.592869	0.563456	0.569181	0.57108	0.56863	0.573437	0.555193	0.563854	0.564763	0.542003	0.57554	0.565471	0.568349	0.562385	0.56781	0.558899	0.586676	0.553014	0.566633	0.570621	0.563716	0.551513	0.569871	0.555614	0.56057	0.560119	0.569024	0.579006	0.570668	0.56945	0.574917
1182.03	0.576505	0.560235	0.580671	0.549026	0.554862	0.567629	0.577411	0.554104	0.55581	0.592558	0.563142	0.568863	0.570786	0.568349	0.573168	0.554918	0.563587	0.564492	0.541722	0.575274	0.565173	0.568044	0.562069	0.567529	0.558605	0.586369	0.552711	0.566322	0.570327	0.563441	0.55122	0.569593	0.555355	0.560301	0.559844	0.568758	0.578734	0.570362	0.569143	0.574638
[truncated: 385 more rows]

## Sheet: Table S6
Table S6 The average raw spectra of coconut water samples from postharvest nuts for Wenye No.2 at developmental stage of 10 months.
[truncated: 1,503 more rows]

[truncated: 5 more sheets: Table S7, Table S8, TableS9, Table S10, Table S11]
